# Supplementary material for: Novel risk loci for COVID-19 hospitalization among admixed American populations
Source: eLife. 2024 Oct 3;13:RP93666. doi: 10.7554/eLife.93666 (PMC11449485; doi:10.7554/eLife.93666)
Supplement: Supplementary file 1. [file elife-93666-supp1.xlsx]

## Sheet: Supplementary Table 1.
Supplementary table 1. Participating centers
Centre	City	Country	Samples
Universidad federal de Pará	Belem	Brazil	229
Universidade Federal da Paraiba	Joao Pessoa	Brazil	26
Federal University of Pernambuco	Recife	Brazil	212
Universidad Federal do Rio Grande do Norte	Natal	Brazil	515
Universidad Brasilia	Brasilia	Brazil	165
Clínica Comfamiliar	Pereira	Colombia	176
Universidad Simón Bolívar	Barranquilla	Colombia	182
SIGEN Alianza Universidad de los Andes-Fundación Santa Fe de Bogotá	Bogotá	Colombia	133
Fundación Universitaria de Ciencias de la Salud	Bogotá	Colombia	397
Universidad Tecnológica Equinoccial	Guayaquil	Ecuador	15
Instituto tecnológico de Monterrey	Monterrey	Mexico	346
Universidad de Guadalajara	Guadalajara	Mexico	33
Centro para el Desarrollo de Investigación Científica (CEDIC)/ UNCA	Asunción	Paraguay	80
Biocruces Bizkaia	Baracaldo	Spain	2
Complejo Asistencial Universitario de León	Leon	Spain	3
Complexo Hospitalario Universitario de A Coruña	Coruña	Spain	7
Complejo Hospitalario Universitario de Santiago de Compostela	Santiago de Compostela	Spain	3
Centro de Investigación Biomédica de la Rioja	Logroño	Spain	5
Centro Nacional de Microbiología, ISCIII	Madrid	Spain	114
Instituto de Investigación Sanitaria Hospital Clínico San Carlos	Madrid	Spain	25
Instituto de Investigacion Sanitaria Fundación Jiménez Díaz1 , 2	Madrid	Spain	271
Hospital Universitario de Getafe	Getafe	Spain	2
Hospital 12 de octubre	Madrid	Spain	118
Hospital Clínico Universitario de Valladolid	Valladolid	Spain	1
Hospital General de Segovia	Segovia	Spain	1
Hospital Universitario Nª Sra. Candelaria	Santa Cruz de Tenerife	Spain	1
Hospital Universitario de Salamanca	Salamanca	Spain	2
Hospital Santa Bárbara de Soria	Soria	Spain	1
Hospital Universitario Gregorio Marañón	Madrid	Spain	71
Centro de Genética Cardiovascular de Girona	Girona	Spain	17
Hospital Universitario y Politécnico La Fe	Valencia	Spain	10
Hospital Universitario de La Paz	Madrid	Spain	35
Hospital Universitari Mútua Terrassa	Terrasa	Spain	39
Hospital Universitario Río Hortega	Valladolid	Spain	2
Hospital Universitario Vírgen del Rocío	Sevilla	Spain	1
Instituto Murciano de Investigación Biosanitaria (IMIB-Arrixaca)2,3	Murcia/Cartagena	Spain	107
IIB Sant Pau	Barcelona	Spain	64
Instituto de Investigación Biomédica de Bellvitge	Barcelona	Spain	29
INDITEX	Arteixo	Spain	3
Hospital Universitario de Móstoles	Móstoles	Spain	18
Fundación Rioja Salud	Logroño	Spain	1
Hospital Marques de Valdecilla	Santander	Spain	11
Universidad de León	Leon	Spain	18
Hospital Universitario Virgen de las Nieves	Granada	Spain	4
