# Supplementary material for: Novel risk loci for COVID-19 hospitalization among admixed American populations
Source: eLife. 2024 Oct 3;13:RP93666. doi: 10.7554/eLife.93666 (PMC11449485; doi:10.7554/eLife.93666)
Supplement: Supplementary file 2. — EA: effect allele; NEA: non-effect allele; EAF: effect allele frequency; EAF_avg: averaged effect allele frequency; FreqSE: standard error of averaged effect allele frequency; SCOURGE_AMR: SCOURGE Latin-America; HGIB2_AMR: HGI meta-analysis of AMR studies. [file elife-93666-supp2.xlsx]

## Sheet: Supplementary Table 2.
Supplementary Table 2. Independent variants with p-value<1e-05 in the SC-HGI_AMR GWAS meta-analysis (hg38). EA: effect allele; NEA: non-effect allele; EAF: Effect allele frequency; EAF_avg: averaged effect allele frequency; FreqSE: standard error of averaged effect allele frequency; SCOURGE_AMR: SCOURGE Latin-America; HGIB2_AMR: HGI meta analysis of AMR studies
						SC-HGI_AMR meta-analysis							SCOURGE_AMR						HGIB2_AMR
SNP	CHR	POS	GENE	type	rsid	EA	NEA	beta	SE	pval	EAF_avg	FreqSE	NEA	EA	beta	SE	pval	EAF	NEA	EA	beta	SE	pval	EAF
1:203618410:G:T	1	203618410	OPTC(dist=109461),ATP2B4(dist=8377)	intergenic	rs12120868	t	g	-0.1647	0.0322	3.076e-07	0.4213	0.0044	G	T	-0.141868	0.073145	0.0524354	0.412301	G	T	-0.17013	0.035819	2.0357e-06	0.4234
1:228245159:T:C	1	228245159	OBSCN	intronic	rs1757130	t	c	0.1457	0.0325	7.317e-06	0.33	0.0018	C	T	0.128261	0.0752753	0.088401	0.333713	T	C	-0.14963	0.036005	3.2419e-05	0.6709
1:30245797:C:T	1	30245797	LINC01648(dist=208185),MATN1(dist=465480)	intergenic	rs1321115	t	c	0.1497	0.0332	6.632e-06	0.31	0.0233	C	T	0.192145	0.0744684	0.00987376	0.356634	C	T	0.13918	0.037139	0.00017864	0.2984
1:38502311:A:G	1	38502311	LINC01685(dist=25827),RRAGC(dist=335889)	intergenic	rs3011203	a	g	-0.4782	0.1039	4.202e-06	0.9734	0.0026	A	G	0.583203	0.20047	0.00362374	0.0308941	A	G	0.4396	0.12154	0.00029811	0.02509
10:121400343:T:G	10	121400343	WDR11(dist=490819),FGFR2(dist=77987)	intergenic	rs7097301	t	g	-0.34	0.0711	1.754e-06	0.1428	0.0048	G	T	-0.308056	0.101676	0.00244729	0.137813	T	G	0.37066	0.099559	0.00019684	0.8525
10:133093164:G:A	10	133093164	ADGRA1	intronic	rs113910052	a	g	0.3498	0.0789	9.389e-06	0.0409	0.0028	G	A	0.144782	0.167878	0.388455	0.0461276	G	A	0.40796	0.089446	5.0918e-06	0.03938
10:15019571:A:G	10	15019571	ACBD7-DCLRE1CP1,DCLRE1CP1	ncRNA_intronic	rs189812040	a	g	-0.9609	0.212	5.809e-06	0.9919	0.0016	A	G	1.45358	0.358366	4.98916e-05	0.0102506	A	G	0.69579	0.26289	0.0081273	0.006932
10:23927227:T:C	10	23927227	KIAA1217	intronic	rs4529808	t	c	0.1463	0.0315	3.456e-06	0.595	0.0044	T	C	-0.17844	0.0722708	0.0135472	0.414009	T	C	-0.13871	0.035014	7.4471e-05	0.4029
10:80555977:G:A	10	80555977	SH2D4B	intronic	rs2880648	a	g	-0.1477	0.033	7.629e-06	0.3452	0.0131	G	A	-0.133687	0.0727419	0.0660872	0.370871	G	A	-0.15139	0.037048	4.3858e-05	0.3386
10:95515777:G:A	10	95515777	SORBS1	intronic	rs77514391	a	g	0.6178	0.1384	8.048e-06	0.0153	0.0014	G	A	0.170365	0.315567	0.589287	0.0125285	G	A	0.72436	0.154	2.5552e-06	0.01596
11:82906875:A:G	11	82906875	DDIAS	intronic	rs77599934	a	g	-0.8228	0.1472	2.259e-08	0.9889	0.0021	A	G	1.27347	0.282453	6.52524e-06	0.0145216	A	G	0.65488	0.17243	0.00014589	0.009842
12:4786686:G:A	12	4786686	GALNT8(dist=13960),KCNA6(dist=22490)	intergenic	rs117879697	a	g	0.356	0.0778	4.702e-06	0.0404	0.0058	G	A	0.354049	0.166981	0.0339815	0.0513952	G	A	0.35654	0.087882	4.9697e-05	0.03738
12:83988871:C:T	12	83988871	TMTC2(dist=854006),SLC6A15(dist=870620)	intergenic	rs7955708	t	c	-0.1534	0.0315	1.115e-06	0.452	0.0023	C	T	-0.099053	0.0708807	0.162275	0.447323	C	T	-0.16683	0.035172	2.1026e-06	0.4531
15:90382489:T:G	15	90382489	ZNF774(dist=19642),IQGAP1(dist=5753)	intergenic	rs2601183	t	g	-0.1843	0.034	6.114e-08	0.6828	0.0307	T	G	0.144982	0.0761415	0.0568961	0.378559	T	G	0.19418	0.038056	3.353e-07	0.3019
16:23830792:C:A	16	23830792	CHP2(dist=71857),PRKCB(dist=5191)	intergenic	rs73554264	a	c	0.8144	0.1807	6.603e-06	0.0086	0.0016	C	A	0.832363	0.321502	0.00962606	0.0109624	C	A	0.80617	0.21855	0.00022532	0.00746
16:48109493:C:T	16	48109493	ABCC12	intronic	rs74598708	t	c	0.5289	0.1122	2.437e-06	0.0228	0.0004	C	T	0.601304	0.250643	0.016438	0.0220672	C	T	0.51078	0.1255	4.7003e-05	0.02299
16:56689391:G:A	16	56689391	MT1X(dist=5195),NUP93(dist=40738)	intergenic	rs62038756	a	g	0.192	0.0418	4.303e-06	0.2059	0.0106	G	A	0.120199	0.0912429	0.187722	0.185364	G	A	0.21098	0.046975	7.0775e-06	0.2114
16:5793956:G:A	16	5793956	MIR8065(dist=161390),RBFOX1(dist=225068)	intergenic	rs28687534	a	g	0.5458	0.1214	6.978e-06	0.0206	0.003	G	A	0.311178	0.223221	0.163307	0.0253417	G	A	0.64436	0.14472	8.4879e-06	0.01866
17:841262:C:T	17	841262	NXN	intronic	rs76214055	t	c	-0.3936	0.0882	8.047e-06	0.0995	0.0196	C	T	-0.35555	0.115521	0.00208532	0.116031	C	T	-0.44665	0.13646	0.0010637	0.07634
18:70928136:G:A	18	70928136	GTSCR1(dist=277182),LINC01541(dist=591828)	intergenic	rs150231001	a	g	-0.3566	0.0722	7.709e-07	0.0452	0.0092	G	A	-0.345676	0.147281	0.0189225	0.0616458	G	A	-0.3601	0.08277	1.3573e-05	0.04
19:50394350:A:G	19	50394350	POLD1	intronic	rs3219337	a	g	-0.1738	0.0345	4.708e-07	0.7203	0.0255	A	G	0.181925	0.0776111	0.0190749	0.33115	A	G	0.17176	0.038504	8.1597e-06	0.267
2:159407982:T:C	2	159407982	BAZ2B	intronic	rs13003835	t	c	0.1789	0.0325	3.657e-08	0.4703	0.0192	C	T	0.230828	0.0740727	0.00183178	0.509681	T	C	-0.16652	0.036148	4.0957e-06	0.5391
21:33235131:G:A	21	33235131	IFNAR2	intronic	rs6517153	a	g	0.1588	0.0316	4.835e-07	0.4255	0.0136	G	A	0.163606	0.0720038	0.0230752	0.453445	G	A	0.15766	0.035104	7.0863e-06	0.4189
21:33940612:C:T	21	33940612	LINC00649	ncRNA_intronic	rs78314212	t	c	0.2132	0.04	9.675e-08	0.1671	0.0192	C	T	0.213821	0.0895641	0.01697	0.205581	C	T	0.21308	0.044685	1.8572e-06	0.1575
22:21879748:G:A	22	21879748	MAPK1(dist=12068),PPM1F(dist=39677)	intergenic	rs5755884	a	g	0.1867	0.0419	8.405e-06	0.1618	0.0022	G	A	0.00662281	0.100036	0.947215	0.157033	G	A	0.22497	0.046146	1.0864e-06	0.1628
3:110577791:A:AT	3	110577791	MIR4445(dist=974894),NECTIN3-AS1(dist=467525)	intergenic	rs112159477	a	at	-0.1963	0.0436	6.724e-06	0.7808	0.0111	A	AT	0.101741	0.0889284	0.252591	0.199459	A	AT	0.22624	0.050029	6.1191e-06	0.2254
3:115597710:G:A	3	115597710	ZBTB20(dist=450422),GAP43(dist=25800)	intergenic	rs11720367	a	g	0.1695	0.0364	3.322e-06	0.2747	0.0006	G	A	0.164901	0.0788776	0.0365646	0.275769	G	A	0.1707	0.041094	3.2685e-05	0.2744
3:179348516:T:C	3	179348516	MFN1	intronic	rs13089906	t	c	-0.5082	0.096	1.201e-07	0.971	0.0014	T	C	0.447093	0.217243	0.0395872	0.0261959	T	C	0.52306	0.10703	1.0237e-06	0.02968
3:45787094:T:C	3	45787094	SLC6A20	intronic	rs2531747	t	c	0.1824	0.0409	8.21e-06	0.2617	0.013	C	T	0.192653	0.0841999	0.0221352	0.238326	T	C	-0.17924	0.046793	0.00012785	0.7311
3:45848457:C:T	3	45848457	LZTFL1	intronic	rs35731912	t	c	0.5017	0.0601	6.926e-17	0.0563	0.0049	C	T	0.507519	0.140879	0.000315143	0.0667711	C	T	0.50045	0.066451	5.0317e-14	0.05397
3:50823172:T:A	3	50823172	DOCK3	intronic	rs1902959	a	t	0.1527	0.0343	8.59e-06	0.5909	0.0153	A	T	-0.135902	0.0734112	0.0641337	0.438069	T	A	0.15743	0.038825	5.0153e-05	0.599
4:120985638:A:G	4	120985638	PRDM5(dist=62912),NDNF(dist=49975)	intergenic	rs144803296	a	g	0.4986	0.1075	3.484e-06	0.9737	0.0016	A	G	-0.780606	0.241106	0.00120536	0.0230638	A	G	-0.42868	0.12003	0.00035513	0.02713
4:149951806:T:A	4	149951806	IQCM(dist=135963),DCLK2(dist=126639)	intergenic	rs77465984	a	t	0.6653	0.1471	6.07e-06	0.0294	0.0037	T	A	0.59648	0.239046	0.0125867	0.0246298	T	A	0.70717	0.18653	0.00014989	0.03225
4:40236269:G:A	4	40236269	RHOH	intronic	rs76290867	a	g	0.5007	0.1108	6.177e-06	0.0285	0.0039	G	A	0.473592	0.245593	0.0538107	0.0207859	G	A	0.50763	0.12411	4.3098e-05	0.03051
5:111804979:C:A	5	111804979	NREP	intronic	rs532816402	a	c	0.5603	0.1185	2.262e-06	0.015	0.0073	C	A	0.439261	0.218364	0.0442614	0.0263383	C	A	0.61076	0.14106	1.4929e-05	0.01026
5:74142715:C:T	5	74142715	ARHGEF28(dist=200722),LINC01335(dist=163695)	intergenic	rs11738090	t	c	0.2318	0.0513	6.094e-06	0.1084	0.0018	C	T	0.193576	0.113078	0.0869173	0.111902	C	T	0.24174	0.057505	2.6256e-05	0.1075
6:12017538:AC:A	6	12017538	HIVEP1	intronic	rs112516121	a	ac	0.7351	0.1604	4.591e-06	0.011	0.0027	AC	A	0.434605	0.292401	0.137191	0.0150911	AC	A	0.86454	0.19187	6.6114e-06	0.00929
6:155124407:C:T	6	155124407	TIAM2	intronic	rs60955209	t	c	0.754	0.1614	2.995e-06	0.0106	0.0001	C	T	0.666763	0.307693	0.030237	0.01082	C	T	0.78717	0.18961	3.3013e-05	0.01055
6:157087503:C:T	6	157087503	ARID1B	intronic	rs77881567	t	c	0.5406	0.119	5.528e-06	0.0227	0.0043	C	T	0.727815	0.211891	0.000592883	0.0290433	C	T	0.45438	0.14378	0.0015768	0.01975
6:162027064:G:A	6	162027064	PRKN	intronic	rs12110423	a	g	0.6646	0.1462	5.46e-06	0.0154	0.0034	G	A	0.653643	0.239049	0.00625046	0.0197893	G	A	0.67111	0.18475	0.00028055	0.01276
6:163642850:T:C	6	163642850	QKI(dist=64259),LOC102724152(dist=21516)	intergenic	rs7767326	t	c	-0.4962	0.107	3.562e-06	0.9741	0.0028	T	C	0.634863	0.193919	0.00106094	0.0301822	T	C	0.43541	0.12837	0.00069409	0.02401
6:25371460:G:C	6	25371460	CARMIL1	intronic	rs9467479	c	g	0.5812	0.1186	9.64e-07	0.0159	0.0002	G	C	-0.00185462	0.280421	0.994723	0.0153759	G	C	0.70828	0.13093	6.3092e-08	0.01597
6:41535254:T:A	6	41535254	FOXP4-AS1	ncRNA_intronic	rs2477820	a	t	-0.1789	0.0318	1.893e-08	0.4983	0.0148	T	A	-0.167877	0.071573	0.019	0.468536	T	A	-0.18167	0.03554	3.1911e-07	0.5057
6:42466886:G:A	6	42466886	TRERF1(dist=14662),UBR2(dist=97136)	intergenic	rs188665121	a	g	0.4736	0.1043	5.628e-06	0.0377	0.0037	G	A	0.181688	0.196483	0.355122	0.0317483	G	A	0.58817	0.1231	1.7718e-06	0.03997
6:6170992:T:G	6	6170992	F13A1	intronic	rs13362686	t	g	-0.3294	0.0732	6.787e-06	0.9368	0.0055	T	G	0.268244	0.136682	0.0497003	0.0718964	T	G	0.35395	0.086662	4.4209e-05	0.05966
6:6536985:A:G	6	6536985	LY86-AS1	ncRNA_intronic	rs193133029	a	g	-0.8144	0.182	7.636e-06	0.9872	0.0044	A	G	0.937521	0.268959	0.000490779	0.0176538	A	G	0.71042	0.24714	0.0040458	0.008767
7:50268931:C:T	7	50268931	SPATA48(dist=109675),IKZF1(dist=35133)	intergenic	rs876038	t	c	0.1465	0.0321	5.088e-06	0.4814	0.0188	T	C	-0.0287215	0.0740386	0.698071	0.479499	C	T	0.17374	0.035637	1.0863e-06	0.4723
8:108587740:T:C	8	108587740	EMC2(dist=98544),NONE(dist=NONE)	intergenic	rs10089785	t	c	0.1565	0.0316	7.365e-07	0.4884	0.0088	C	T	0.110347	0.0693068	0.111349	0.471241	T	C	-0.16859	0.035509	2.057e-06	0.5071
8:113779041:G:A	8	113779041	CSMD3(dist=342102),TRPS1(dist=1629455)	intergenic	rs72675353	a	g	0.7039	0.1527	4.054e-06	0.0144	0.0013	G	A	0.402949	0.320137	0.208148	0.011959	G	A	0.79253	0.17378	5.1017e-06	0.01506
8:137131551:G:C	8	137131551	LINC02055(dist=233950),LOC101927915(dist=274550)	intergenic	rs77738220	c	g	0.3701	0.0825	7.299e-06	0.04	0.0033	G	C	0.298296	0.197093	0.130159	0.0328872	G	C	0.38532	0.090863	2.2284e-05	0.04154
9:10515751:T:A	9	10515751	PTPRD	intronic	rs60037109	a	t	-0.6414	0.1353	2.116e-06	0.0254	0.0038	T	A	-0.773458	0.242933	0.00145343	0.0197893	T	A	-0.58206	0.16283	0.00035056	0.02799
9:4235142:T:A	9	4235142	GLIS3	intronic	rs11794626	a	t	0.2866	0.062	3.869e-06	0.0759	0.0016	T	A	0.347195	0.13331	0.00920294	0.0728929	T	A	0.26978	0.070103	0.00011894	0.07673
