# Supplementary material for: Novel risk loci for COVID-19 hospitalization among admixed American populations
Source: eLife. 2024 Oct 3;13:RP93666. doi: 10.7554/eLife.93666 (PMC11449485; doi:10.7554/eLife.93666)
Supplement: Supplementary file 3. — NEA: non-effect allele; EA: effect allele; r2: maximum r2 of the SNP with one of the independent SNPs; IndSigSNP: the independent SNP which has the maximum r2 value with the SNP; dist: distance to the nearest gene; func: functional consequence of the SNP on the gene; CADD: CADD score; RDB: RegulomeDB score; minChrState: the minimum 15-core chromatin state across 127 tissues/cell types; commonChrState: the most common 15-core chromatin state across 127 tissues/cell types; posMapFilt: 1 if the SNP was used for positional mapping, 0 otherwise; eqtlMapFilt: 1 if the SNP was used for eQTL mapping, 0 otherwise. [file elife-93666-supp3.xlsx]

## Sheet: Supplementary Table 3.
Supplementary Table 3. Annotated SNPs in moderate-to-strong LD with lead SNPs of the genome-wide significant loci in the SC-HGI_AMR GWAS meta-analysis, with ANNOVAR. NEA: non-effect allele; EA: effect allele; r2: maximum r2 of the SNP with one of the independent SNPs; IndSigSNP: the independent SNP which has the maximum r2 value with the SNP; dist: distance to the nearest gene; func: functional c…
uniqID	rsID	CHR	POS	NEA	EA	MAF	gwasP	beta	SE	r2	IndSigSNP	nearestGene	dist	func	CADD	RDB	minChrState	commonChrState	posMapFilt	eqtlMapFilt
2:160218677:G:GA	rs11354532	2	160218677	GA	G	0.4597	4.413e-06	-0.1661	0.0362	0.735745	rs13003835	BAZ2B	0	intronic	1.472	NA	4	5	1	0
2:160218751:A:C	rs7559654	2	160218751	C	A	0.4597	1.696e-06	-0.1585	0.0331	0.735745	rs13003835	BAZ2B	0	intronic	0.111	3a	4	5	1	1
2:160220336:A:G	rs3771687	2	160220336	G	A	0.4496	2.342e-06	0.1564	0.0331	0.780525	rs13003835	BAZ2B	0	intronic	2.356	3a	4	4	1	1
2:160220798:A:G	rs3771688	2	160220798	G	A	0.4496	2.391e-06	0.1561	0.0331	0.780525	rs13003835	BAZ2B	0	intronic	7.013	7	4	4	1	1
2:160221802:C:T	rs3771689	2	160221802	C	T	0.4496	2.509e-06	0.1552	0.033	0.780525	rs13003835	BAZ2B	0	intronic	4.331	7	4	4	1	1
2:160222239:A:G	rs888632	2	160222239	G	A	0.4496	2.662e-06	0.1554	0.0331	0.780525	rs13003835	BAZ2B	0	intronic	3.784	NA	4	4	1	1
2:160222902:A:T	rs888630	2	160222902	T	A	0.4496	2.142e-06	0.1569	0.0331	0.780525	rs13003835	BAZ2B	0	intronic	5.978	6	4	4	1	1
2:160223384:C:G	rs2357173	2	160223384	G	C	0.4496	2.098e-06	-0.157	0.0331	0.780525	rs13003835	BAZ2B	0	intronic	2.012	5	4	4	1	1
2:160224168:A:G	rs6432529	2	160224168	G	A	0.4352	6.17e-07	0.1659	0.0333	0.807409	rs13003835	BAZ2B	0	intronic	2.646	7	4	5	1	1
2:160224271:C:T	rs7559223	2	160224271	C	T	0.4957	4.471e-06	-0.1482	0.0323	0.685282	rs13003835	BAZ2B	0	intronic	2.083	7	4	5	1	1
2:160225287:C:T	rs3771695	2	160225287	C	T	0.4409	3.876e-07	0.1685	0.0332	0.785663	rs13003835	BAZ2B	0	intronic	0.19	7	4	5	1	1
2:160226845:A:AT	rs56110903	2	160226845	A	AT	0.4769	NA	NA	NA	0.616315	rs13003835	BAZ2B	0	intronic	0.546	NA	4	5	1	1
2:160227975:A:T	rs12468969	2	160227975	T	A	0.4409	4.332e-07	0.1678	0.0332	0.785663	rs13003835	BAZ2B	0	intronic	6.368	6	4	5	1	1
2:160230587:C:CT	rs113508055	2	160230587	C	CT	0.464	NA	NA	NA	0.660262	rs13003835	BAZ2B	0	intronic	0.541	NA	4	5	1	0
2:160232967:A:G	rs2161080	2	160232967	G	A	0.4352	4.738e-07	-0.1669	0.0331	0.807409	rs13003835	BAZ2B	0	intronic	3.805	NA	4	5	1	1
2:160235751:A:G	rs12618293	2	160235751	G	A	0.4352	4.536e-07	0.1677	0.0332	0.807409	rs13003835	BAZ2B	0	intronic	8.074	5	4	5	1	1
2:160235998:C:T	rs12611927	2	160235998	C	T	0.4914	3.225e-06	-0.153	0.0329	0.704425	rs13003835	BAZ2B	0	intronic	7.825	6	4	5	1	1
2:160236167:C:G	rs10929940	2	160236167	G	C	0.4611	9.045e-07	-0.1624	0.0331	0.783472	rs13003835	BAZ2B	0	intronic	0.5	6	4	5	1	1
2:160240692:A:G	rs2112116	2	160240692	G	A	0.4352	4.329e-07	0.168	0.0332	0.807409	rs13003835	BAZ2B	0	intronic	4.087	NA	4	5	1	1
2:160242424:A:G	rs3771706	2	160242424	G	A	0.4265	1.241e-06	0.1613	0.0333	0.784091	rs13003835	BAZ2B	0	intronic	0.911	6	4	4	1	1
2:160242616:A:T	rs3771707	2	160242616	T	A	0.4769	1.191e-07	0.172	0.0325	0.898747	rs13003835	BAZ2B	0	intronic	2.594	6	4	4	1	1
2:160243183:A:T	rs918351	2	160243183	T	A	0.4553	4.676e-07	-0.1667	0.0331	0.814361	rs13003835	BAZ2B:AC008277.1	00:00:00	ncRNA_intronic	6.774	6	4	5	1	1
2:160243184:A:T	rs918350	2	160243184	T	A	0.4553	4.67e-07	0.1667	0.0331	0.814361	rs13003835	BAZ2B:AC008277.1	00:00:00	ncRNA_intronic	5.547	6	4	5	1	1
2:160243726:A:G	rs3771709	2	160243726	G	A	0.4553	5.722e-07	0.1654	0.0331	0.814361	rs13003835	BAZ2B:AC008277.1	00:00:00	ncRNA_intronic	6.768	7	4	5	1	1
2:160243794:C:T	rs3771710	2	160243794	C	T	0.4568	6.459e-07	0.1647	0.0331	0.818086	rs13003835	BAZ2B:AC008277.1	00:00:00	ncRNA_intronic	3.44	6	4	5	1	1
2:160244080:C:T	rs3771711	2	160244080	C	T	0.4611	7.484e-07	0.1637	0.0331	0.803058	rs13003835	BAZ2B:AC008277.1	00:00:00	ncRNA_intronic	1.91	6	4	5	1	1
2:160244205:A:G	rs13010687	2	160244205	G	A	0.4568	6.525e-07	-0.1646	0.0331	0.818086	rs13003835	BAZ2B:AC008277.1	00:00:00	ncRNA_intronic	4.165	6	4	5	1	1
2:160245088:A:T	rs12692548	2	160245088	T	A	0.4568	6.783e-07	-0.1643	0.0331	0.818086	rs13003835	BAZ2B:AC008277.1	00:00:00	ncRNA_intronic	9.239	7	4	5	1	1
2:160248290:G:GAT	rs35334995	2	160248290	GAT	G	0.4986	4.106e-07	-0.1788	0.0353	0.863961	rs13003835	BAZ2B:AC008277.1	00:00:00	ncRNA_intronic	1.475	NA	4	5	1	1
2:160248648:A:G	rs12994216	2	160248648	G	A	0.4582	2.507e-06	0.1556	0.0331	0.785421	rs13003835	BAZ2B:AC008277.1	00:00:00	ncRNA_exonic	1.339	5	4	5	1	1
2:160249771:C:T	rs12692550	2	160249771	C	T	0.4798	1.396e-07	0.1696	0.0322	0.816385	rs13003835	BAZ2B:AC008277.1	00:00:00	ncRNA_intronic	0.399	7	4	5	1	1
2:160250138:T:TC	rs67413247	2	160250138	TC	T	0.4798	1.058e-06	-0.1721	0.0353	0.806037	rs13003835	BAZ2B:AC008277.1	00:00:00	ncRNA_intronic	1.559	NA	4	5	1	1
2:160250140:A:T	rs5022534	2	160250140	T	A	0.4798	7.43e-07	-0.1671	0.0338	0.806037	rs13003835	BAZ2B:AC008277.1	00:00:00	ncRNA_intronic	7.249	6	4	5	1	1
2:160251572:A:G	rs7609152	2	160251572	G	A	0.4741	8.223e-06	0.1468	0.0329	0.748125	rs13003835	BAZ2B:AC008277.1	00:00:00	ncRNA_intronic	1.578	6	4	5	1	1
2:160254658:A:G	rs77532579	2	160254658	G	A	0.4121	2.65e-06	0.1592	0.0339	0.747355	rs13003835	BAZ2B:AC008277.1	00:00:00	ncRNA_intronic	0.192	5	4	5	1	1
2:160258370:C:T	rs2884110	2	160258370	C	T	0.4914	1.862e-06	-0.1544	0.0324	0.869572	rs13003835	BAZ2B:AC008277.1	00:00:00	ncRNA_intronic	1.887	6	4	5	1	1
2:160262693:C:T	rs2032777	2	160262693	C	T	0.4914	1.985e-06	-0.1537	0.0323	0.869572	rs13003835	BAZ2B	0	intronic	5.118	NA	4	5	1	1
2:160264493:C:T	rs13003835	2	160264493	C	T	0.4885	3.657e-08	0.1789	0.0325	1	rs13003835	BAZ2B	0	intronic	2.357	7	4	5	1	1
2:160265520:A:G	rs6432531	2	160265520	G	A	0.4798	4.3e-07	-0.1642	0.0325	0.95892	rs13003835	BAZ2B	0	intronic	0.759	7	4	5	1	1
2:160268393:A:G	rs3771715	2	160268393	G	A	0.4784	5.455e-07	0.1648	0.0329	0.954017	rs13003835	BAZ2B	0	intronic	16.54	7	4	4	1	1
2:160269308:C:T	rs3755434	2	160269308	C	T	0.487	3.979e-08	0.1784	0.0325	0.994827	rs13003835	BAZ2B	0	intronic	3.251	6	4	5	1	1
2:160269847:A:C	rs6432532	2	160269847	C	A	0.4769	3.05e-07	-0.1685	0.0329	0.959446	rs13003835	BAZ2B	0	intronic	4.891	6	4	5	1	1
2:160270133:G:T	rs9973670	2	160270133	G	T	0.4597	1.912e-07	0.1687	0.0324	0.827692	rs13003835	BAZ2B	0	intronic	0.56	6	4	5	1	1
2:160270858:A:C	rs12463644	2	160270858	C	A	0.4539	9.236e-07	0.1619	0.033	0.878892	rs13003835	BAZ2B	0	intronic	10.68	7	4	5	1	1
2:160271750:G:T	rs7567974	2	160271750	G	T	0.4755	4.928e-08	0.1792	0.0329	0.803179	rs13003835	BAZ2B	0	intronic	2.881	5	4	5	1	1
3:45841938:C:T	rs35896106	3	45841938	C	T	0.04611	1.144e-15	0.4816	0.0601	0.873049	rs35731912	SLC6A20	3910	intergenic	0.407	6	5	14	1	0
3:45843242:A:G	rs13071258	3	45843242	G	A	0.04179	6.719e-16	0.5169	0.064	0.9661	rs35731912	SLC6A20	5214	intergenic	3.784	6	4	14	1	1
3:45843315:C:T	rs17763537	3	45843315	C	T	0.04179	7.788e-16	0.5171	0.0642	0.9661	rs35731912	SLC6A20	5287	intergenic	0.241	7	4	14	1	1
3:45843439:G:T	3:45843439:G:T	3	45843439	G	T	0.04179	NA	NA	NA	0.9661	rs35731912	SLC6A20	5411	intergenic	4.173	5	4	14	1	1
3:45844198:A:C	rs34668658	3	45844198	C	A	0.04179	1.144e-16	-0.5276	0.0637	0.9661	rs35731912	SLC6A20	6170	intergenic	1.551	7	4	15	1	1
3:45845748:A:C	rs17078346	3	45845748	C	A	0.07205	7.795e-12	-0.3695	0.054	1	rs17078346	SLC6A20	7720	intergenic	1.571	7	4	15	1	0
3:45846769:A:G	rs17763742	3	45846769	G	A	0.04179	8.087e-17	-0.5291	0.0635	0.9661	rs35731912	SLC6A20	8741	intergenic	0.577	7	4	15	1	1
3:45847241:A:G	rs17078348	3	45847241	G	A	0.07349	2.048e-11	-0.3584	0.0535	0.90096	rs17078346	SLC6A20	9213	intergenic	2.574	7	4	15	1	0
3:45848760:C:G	3:45848760:C:G	3	45848760	G	C	0.04179	NA	NA	NA	0.9661	rs35731912	SLC6A20	10732	intergenic	0.735	4	4	15	0	1
3:45850783:A:T	rs72893671	3	45850783	T	A	0.05908	1.668e-13	0.4259	0.0578	0.820811	rs17078346	SLC6A20	12755	intergenic	2.772	6	4	15	0	0
3:45859651:A:G	rs17713054	3	45859651	G	A	0.04323	2.394e-16	0.5102	0.0622	1	rs35731912	LZTFL1	5156	intergenic	2.996	4	4	5	1	1
3:45861932:A:G	rs13078854	3	45861932	G	A	0.04323	2.275e-16	0.5106	0.0622	1	rs35731912	LZTFL1	2875	intergenic	7.958	7	4	5	1	1
3:45862952:C:T	rs71325088	3	45862952	C	T	0.04323	2.26e-16	-0.51	0.0621	1	rs35731912	LZTFL1	1855	intergenic	13.68	7	4	5	1	1
3:45864732:C:T	rs10490770	3	45864732	C	T	0.04323	4.007e-16	-0.5073	0.0623	1	rs35731912	LZTFL1	75	downstream	7.643	NA	4	5	1	1
3:45867440:A:G	rs35624553	3	45867440	G	A	0.04611	1.897e-16	-0.512	0.0622	0.93599	rs35731912	LZTFL1	0	UTR3	5.695	7	4	5	1	1
3:45871139:G:GA	rs71619611	3	45871139	GA	G	0.04755	NA	NA	NA	0.906729	rs35731912	LZTFL1	0	intronic	0.951	NA	4	5	1	0
3:45871908:A:G	rs67959919	3	45871908	G	A	0.04323	2.453e-16	0.5106	0.0623	1	rs35731912	LZTFL1	0	intronic	2.607	5	4	4	1	1
3:45876459:G:GA	rs11385942	3	45876459	GA	G	0.04611	1.001e-15	-0.5096	0.0635	0.93599	rs35731912	LZTFL1	0	intronic	2.568	NA	4	5	1	1
3:45880481:C:T	rs35508621	3	45880481	C	T	0.04323	2.374e-16	-0.5131	0.0626	1	rs35731912	LZTFL1	0	intronic	3.728	6	4	5	1	1
3:45888690:A:G	rs34288077	3	45888690	G	A	0.04323	2.245e-16	-0.5136	0.0626	1	rs35731912	LZTFL1	0	intronic	10.71	5	5	14	1	1
3:45889921:A:T	rs35081325	3	45889921	T	A	0.04323	2.237e-16	-0.5137	0.0626	1	rs35731912	LZTFL1	0	intronic	2.108	7	4	14	1	1
3:45889949:C:T	rs35731912	3	45889949	C	T	0.04323	6.926e-17	0.5017	0.0601	1	rs35731912	LZTFL1	0	intronic	0.264	7	4	14	1	1
3:45899651:A:G	rs34326463	3	45899651	G	A	0.04323	1.486e-16	-0.5195	0.0629	1	rs35731912	LZTFL1	0	intronic	4.966	5	5	15	1	1
3:45900634:C:G	rs76374459	3	45900634	G	C	0.03026	1.492e-12	0.5892	0.0833	0.702346	rs35731912	LZTFL1	0	intronic	2.871	4	5	15	1	1
3:45901089:C:T	rs73064425	3	45901089	C	T	0.04323	1.544e-16	0.5193	0.0629	1	rs35731912	LZTFL1	0	intronic	1.041	5	5	15	1	1
3:45908116:A:T	rs13081482	3	45908116	T	A	0.04467	1.45e-16	-0.5208	0.063	0.967025	rs35731912	LZTFL1	0	intronic	0.944	6	5	15	1	1
3:45908514:C:G	rs35652899	3	45908514	G	C	0.04467	5.003e-16	-0.5217	0.0643	0.967025	rs35731912	LZTFL1	0	intronic	5.41	6	5	15	1	1
3:45909024:A:G	rs35044562	3	45909024	G	A	0.04467	1.697e-16	-0.5196	0.063	0.967025	rs35731912	LZTFL1	0	intronic	0.93	5	5	15	1	1
3:45909528:C:T	rs73064431	3	45909528	C	T	0.04035	1.039e-16	0.5022	0.0605	0.86602	rs35731912	LZTFL1	0	intronic	0.645	7	5	15	1	1
3:45909644:A:C	rs13092887	3	45909644	C	A	0.04035	1.429e-15	0.5243	0.0657	0.86602	rs35731912	LZTFL1	0	intronic	0.519	5	5	15	1	0
3:45914585:C:CTT	rs35482426	3	45914585	C	CTT	0.0562	5.771e-11	-0.424	0.0647	0.975916	rs34901975	LZTFL1	0	intronic	3.252	NA	2	15	1	1
3:45916222:C:T	rs12639224	3	45916222	C	T	0.1787	4.371e-08	0.2218	0.0405	1	rs12639224	LZTFL1	0	intronic	3.466	4	3	15	1	1
3:45916547:T:TA	rs35605052	3	45916547	TA	T	0.1182	3.377e-07	0.2616	0.0513	0.651666	rs12639224	LZTFL1	0	intronic	5.351	NA	3	15	1	1
3:45916786:A:G	rs34901975	3	45916786	G	A	0.05764	3.067e-12	0.4168	0.0598	1	rs34901975	LZTFL1	0	intronic	0.919	5	5	15	1	1
3:45918215:A:G	rs17764831	3	45918215	G	A	0.05764	3.661e-12	0.4153	0.0598	1	rs34901975	LZTFL1	0	intronic	1.291	7	5	15	1	1
3:45920298:C:T	rs34518147	3	45920298	C	T	0.05764	4.917e-12	-0.4126	0.0597	1	rs34901975	LZTFL1	0	intronic	0.397	6	5	15	1	1
3:45926043:C:T	rs74586549	3	45926043	C	T	0.1023	1.897e-08	0.2659	0.0473	0.955176	rs7653372	LZTFL1	0	intronic	0.059	4	1	15	1	1
3:45927759:C:T	rs7653372	3	45927759	C	T	0.1066	8.468e-09	-0.2695	0.0468	1	rs7653372	LZTFL1	0	intronic	4.704	2b	2	15	1	1
3:45928769:A:G	rs34338823	3	45928769	G	A	0.05764	6.911e-12	0.4092	0.0597	1	rs34901975	LZTFL1:CCR9	00:00:00	intronic	3.755	5	1	15	1	1
3:45930796:T:TA	rs397989423	3	45930796	TA	T	0.06052	1.168e-09	0.3881	0.0638	0.953696	rs34901975	LZTFL1:CCR9	00:00:00	intronic	0.021	NA	1	15	1	0
3:45932407:A:G	rs71325091	3	45932407	G	A	0.05764	9.035e-12	0.4074	0.0597	1	rs34901975	LZTFL1:CCR9	00:00:00	intronic	6.254	5	1	15	1	1
3:45936945:C:G	rs6782814	3	45936945	G	C	0.1167	4.74e-08	0.2485	0.0455	0.874951	rs7653372	LZTFL1:CCR9	00:00:00	intronic	0.064	2b	5	15	1	1
3:45939016:A:G	rs17764980	3	45939016	G	A	0.05764	1.512e-11	0.4012	0.0595	1	rs34901975	LZTFL1:CCR9	00:00:00	intronic	4.193	4	4	15	1	1
3:45939802:A:G	rs17714101	3	45939802	G	A	0.05764	1.152e-11	0.404	0.0595	1	rs34901975	LZTFL1:CCR9	00:00:00	intronic	1.892	7	5	15	1	1
3:45945132:A:C	rs17714228	3	45945132	C	A	0.05764	1.767e-11	-0.4006	0.0596	1	rs34901975	LZTFL1	0	intronic	1.449	7	4	15	1	1
3:45947018:A:G	rs71325092	3	45947018	G	A	0.05764	2.279e-11	-0.3983	0.0596	1	rs34901975	LZTFL1	0	intronic	2.398	5	5	15	1	1
3:45951647:A:G	rs35280891	3	45951647	G	A	0.0634	1.445e-10	0.3698	0.0577	0.911106	rs34901975	LZTFL1	0	intronic	8.293	6	3	15	1	1
3:45954339:C:T	rs34068335	3	45954339	C	T	0.0562	6.062e-11	0.3862	0.059	0.975916	rs34901975	LZTFL1	0	intronic	0.479	5	3	15	1	1
3:45960420:C:G	rs1994491	3	45960420	G	C	0.06052	9.003e-11	0.3711	0.0572	0.911231	rs34901975	FYCO1	0	UTR3	4.576	4	4	5	1	1
3:45960646:C:T	rs1994492	3	45960646	C	T	0.0562	9.834e-11	-0.3803	0.0588	0.975916	rs34901975	FYCO1	0	UTR3	11.76	3a	4	5	1	1
3:45960700:C:T	rs1994493	3	45960700	C	T	0.0562	9.834e-11	0.3803	0.0588	0.975916	rs34901975	FYCO1	0	UTR3	9.694	3a	4	5	1	1
3:45962603:A:G	rs75928798	3	45962603	G	A	0.0562	9.663e-11	-0.3804	0.0588	0.975916	rs34901975	FYCO1	0	UTR3	3.595	4	4	4	1	1
3:45967800:C:CA	rs71619614	3	45967800	C	CA	0.05764	1.094e-09	-0.387	0.0635	0.952262	rs34901975	FYCO1	0	intronic	1.361	NA	4	5	1	1
3:45968043:G:T	rs2373087	3	45968043	G	T	0.05764	2.536e-10	-0.3707	0.0586	0.952262	rs34901975	FYCO1	0	intronic	6.279	6	4	5	1	1
3:45970391:A:G	rs35831747	3	45970391	G	A	0.05908	2.499e-10	0.3709	0.0586	0.929616	rs34901975	FYCO1	0	intronic	2.765	5	4	4	1	1
3:45970944:C:G	rs13099120	3	45970944	G	C	0.05764	3.667e-10	-0.3828	0.0611	0.952262	rs34901975	FYCO1	0	intronic	0.456	2b	4	4	1	1
3:45974092:A:G	rs35477280	3	45974092	G	A	0.05764	2.481e-10	0.371	0.0586	0.952262	rs34901975	FYCO1	0	intronic	9.515	7	4	4	1	1
3:45975443:C:T	rs13066516	3	45975443	C	T	0.05764	2.609e-10	0.3702	0.0586	0.952262	rs34901975	FYCO1	0	intronic	0.352	6	4	4	1	1
3:45975485:T:TA	rs200582580	3	45975485	T	TA	0.05908	NA	NA	NA	0.929616	rs34901975	FYCO1	0	intronic	1.42	NA	4	4	1	0
3:45976662:C:T	rs77902290	3	45976662	C	T	0.05764	2.609e-10	0.3702	0.0586	0.952262	rs34901975	FYCO1	0	intronic	6.755	7	4	4	1	1
3:45977810:A:AAAG	rs147246298	3	45977810	AAAG	A	0.05764	1.959e-09	0.3802	0.0634	0.952262	rs34901975	FYCO1	0	intronic	6.23	NA	4	4	1	1
3:45981171:C:T	rs2171531	3	45981171	C	T	0.05764	3.042e-10	0.3683	0.0585	0.952262	rs34901975	FYCO1	0	intronic	1.037	4	4	5	1	1
3:45983476:A:T	rs55920693	3	45983476	T	A	0.05764	2.95e-10	0.3682	0.0584	0.952262	rs34901975	FYCO1:CXCR6	00:00:00	intronic	3.671	5	4	5	1	1
3:45985347:C:G	rs6785091	3	45985347	G	C	0.1196	1.469e-09	-0.2856	0.0472	1	rs6785091	FYCO1:CXCR6	00:00:00	intronic	3.59	6	1	5	1	1
3:45989873:C:T	rs56332428	3	45989873	C	T	0.0634	6.958e-10	0.35	0.0568	0.871851	rs34901975	FYCO1	0	intronic	4.367	4	4	4	1	1
3:45989921:G:T	rs71325095	3	45989921	G	T	0.06196	3.876e-10	0.3562	0.0569	0.891154	rs34901975	FYCO1	0	intronic	0.746	4	4	4	1	1
3:45993645:C:T	rs35501575	3	45993645	C	T	0.05908	5.732e-10	0.3565	0.0575	0.929616	rs34901975	FYCO1	0	intronic	0.264	5	4	4	1	1
3:45994205:G:GGA	rs143443576	3	45994205	GGA	G	0.06196	1.958e-09	-0.3701	0.0617	0.891154	rs34901975	FYCO1	0	intronic	5.338	NA	4	4	1	1
3:45995708:T:TGG	rs532777636	3	45995708	T	TGG	0.05764	NA	NA	NA	0.903969	rs34901975	FYCO1	0	intronic	0.973	NA	4	4	1	1
3:45995748:C:T	rs34381952	3	45995748	C	T	0.0634	7.845e-10	-0.3482	0.0566	0.871851	rs34901975	FYCO1	0	intronic	5.407	6	4	4	1	1
3:45996501:A:G	rs4388012	3	45996501	G	A	0.06196	4.121e-10	-0.3544	0.0567	0.891154	rs34901975	FYCO1	0	intronic	3.431	5	4	4	1	1
3:45997263:C:T	rs41289616	3	45997263	C	T	0.06196	4.711e-10	-0.3535	0.0568	0.891154	rs34901975	FYCO1	0	intronic	4.623	7	3	4	1	1
3:45997506:G:GA	rs35257780	3	45997506	GA	G	0.05764	2.123e-09	-0.3775	0.063	0.952262	rs34901975	FYCO1	0	intronic	11.81	NA	2	4	1	1
3:45998058:G:GTTC	rs147316571	3	45998058	GTTC	G	0.05764	1.977e-09	0.3782	0.063	0.952262	rs34901975	FYCO1	0	intronic	2.172	NA	1	4	1	1
3:45999209:A:G	rs34000569	3	45999209	G	A	0.05764	4.773e-10	-0.3631	0.0583	0.952262	rs34901975	FYCO1	0	intronic	3.358	4	1	4	1	1
3:46000728:G:T	rs34324101	3	46000728	G	T	0.05764	4.766e-10	-0.3632	0.0583	0.952262	rs34901975	FYCO1	0	intronic	5.373	5	4	4	1	1
3:46000870:A:G	rs13069079	3	46000870	G	A	0.05764	4.773e-10	0.3631	0.0583	0.952262	rs34901975	FYCO1	0	intronic	0.068	5	4	4	1	1
3:46001227:A:G	rs76597151	3	46001227	G	A	0.06196	5.515e-10	0.3513	0.0566	0.891154	rs34901975	FYCO1	0	intronic	4.409	5	4	4	1	1
3:46001367:A:C	rs34849862	3	46001367	C	A	0.05764	4.773e-10	0.3631	0.0583	0.952262	rs34901975	FYCO1	0	intronic	1.952	7	4	4	1	1
3:46001720:G:T	rs35827997	3	46001720	G	T	0.0634	6.74e-10	-0.3496	0.0566	0.871851	rs34901975	FYCO1	0	intronic	3.132	5	4	4	1	1
3:46002963:C:G	rs71325096	3	46002963	G	C	0.05908	6.953e-10	0.3595	0.0583	0.929616	rs34901975	FYCO1	0	intronic	0.175	6	4	4	1	1
3:46003496:C:T	rs35209528	3	46003496	C	T	0.05764	1.041e-09	-0.3558	0.0583	0.952262	rs34901975	FYCO1	0	intronic	4.641	4	4	4	1	1
3:46003537:A:G	rs36039366	3	46003537	G	A	0.06196	7.446e-10	0.3484	0.0566	0.891154	rs34901975	FYCO1	0	intronic	2.053	4	4	4	1	1
3:46006239:A:G	rs35855315	3	46006239	G	A	0.0634	1.044e-09	-0.3494	0.0572	0.871851	rs34901975	FYCO1	0	intronic	12	5	4	4	1	1
3:46006269:C:T	rs35525815	3	46006269	C	T	0.0634	1.038e-09	0.3494	0.0572	0.871851	rs34901975	FYCO1	0	intronic	3.548	5	4	4	1	1
3:46006341:C:G	rs17280623	3	46006341	G	C	0.0634	1.034e-09	-0.3494	0.0572	0.871851	rs34901975	FYCO1	0	intronic	10.31	7	4	4	1	1
3:46007488:A:G	rs13078739	3	46007488	G	A	0.0634	1.351e-09	0.3469	0.0572	0.871851	rs34901975	FYCO1	0	intronic	7.1	5	2	4	1	1
3:46007823:G:T	rs13079478	3	46007823	G	T	0.05908	1.141e-09	0.3592	0.059	0.929616	rs34901975	FYCO1	0	exonic	14.93	5	3	4	1	1
3:46007825:C:T	rs13059238	3	46007825	C	T	0.0634	1.223e-09	-0.3483	0.0573	0.871851	rs34901975	FYCO1	0	exonic	12.88	5	3	4	1	1
3:46008087:A:G	rs13079869	3	46008087	G	A	0.06052	2.528e-09	0.3511	0.0589	0.907917	rs34901975	FYCO1	0	exonic	0.099	5	3	4	1	1
3:46009487:A:G	rs33910087	3	46009487	G	A	0.05908	1.254e-09	0.3566	0.0587	0.929616	rs34901975	FYCO1	0	exonic	8.74	5	4	4	1	1
3:46010007:C:T	rs13071283	3	46010007	C	T	0.0634	1.535e-09	-0.3459	0.0573	0.871851	rs34901975	FYCO1	0	exonic	2.766	2c	4	4	1	1
3:46011436:A:G	rs17214952	3	46011436	G	A	0.0634	1.777e-09	-0.344	0.0572	0.871851	rs34901975	FYCO1	0	intronic	4.791	5	4	4	1	1
3:46012279:C:T	rs17215008	3	46012279	C	T	0.05908	1.273e-09	-0.3581	0.059	0.929616	rs34901975	FYCO1	0	intronic	4.996	6	4	5	1	1
3:46012375:C:CTA	rs149942772	3	46012375	C	CTA	0.05908	4.715e-09	-0.3731	0.0637	0.929616	rs34901975	FYCO1	0	intronic	6.817	NA	4	5	1	1
3:46012391:A:G	rs71325098	3	46012391	G	A	0.05908	1.353e-09	-0.3575	0.059	0.929616	rs34901975	FYCO1	0	intronic	4.103	6	4	5	1	1
3:46012542:T:TA	rs139901862	3	46012542	TA	T	0.0634	5.647e-09	-0.3605	0.0619	0.871851	rs34901975	FYCO1	0	intronic	2.146	NA	4	5	1	1
3:46013832:C:T	rs71325100	3	46013832	C	T	0.05908	1.273e-09	0.3581	0.059	0.929616	rs34901975	FYCO1	0	intronic	2.686	5	2	5	1	1
3:46014545:G:T	rs41289622	3	46014545	G	T	0.05908	1.273e-09	-0.3581	0.059	0.929616	rs34901975	FYCO1	0	intronic	5.773	4	2	4	1	1
3:46015569:C:T	rs71325101	3	46015569	C	T	0.06484	1.508e-09	-0.3461	0.0573	0.859174	rs34901975	FYCO1	0	intronic	3.182	7	4	5	1	1
3:46015933:C:T	rs71325102	3	46015933	C	T	0.0634	1.468e-09	-0.3462	0.0573	0.871851	rs34901975	FYCO1	0	intronic	3.184	5	4	4	1	1
3:46018344:A:G	rs13066062	3	46018344	G	A	0.05908	9.532e-10	0.3608	0.059	0.929616	rs34901975	FYCO1	0	intronic	12.4	3a	3	4	1	1
3:46018781:A:G	rs71615437	3	46018781	A	G	0.0389	NA	NA	NA	0.708043	rs35731912	FYCO1	0	intronic	5.604	7	4	4	1	1
3:46022833:A:G	rs36122610	3	46022833	G	A	0.05908	9.426e-10	0.361	0.059	0.929616	rs34901975	FYCO1	0	intronic	7.748	4	4	4	1	1
3:46024529:A:T	rs34442130	3	46024529	T	A	0.05908	9.166e-10	0.3612	0.059	0.929616	rs34901975	FYCO1	0	intronic	6.743	6	3	4	1	1
3:46025048:A:G	rs13075758	3	46025048	G	A	0.05908	1.577e-09	0.3577	0.0593	0.929616	rs34901975	FYCO1	0	intronic	4.891	4	3	4	1	1
3:46029098:C:CA	rs34044394	3	46029098	C	CA	0.05908	4.844e-09	-0.374	0.0639	0.929616	rs34901975	FYCO1	0	intronic	7.654	NA	2	7	1	1
3:46033167:G:GCCTTACCCACAGACTCCTTCAC	rs146285477	3	46033167	G	GCCTTACCCACAGACTCCTTCAC	0.05908	NA	NA	NA	0.929616	rs34901975	FYCO1	0	intronic	2.596	NA	2	5	1	1
3:46035097:A:G	rs17330872	3	46035097	G	A	0.05908	1.077e-09	-0.3618	0.0593	0.929616	rs34901975	FYCO1	0	intronic	4.383	4	2	7	1	1
3:46036387:A:AT	rs142571332	3	46036387	AT	A	0.06772	2e-07	-0.3332	0.0641	0.811727	rs34901975	FYCO1	0	intronic	11.64	NA	1	2	1	0
3:46036521:C:T	rs71327003	3	46036521	C	T	0.05908	2.466e-08	0.3457	0.062	0.929616	rs34901975	FYCO1	0	intronic	7.049	2b	1	1	1	1
3:46039060:C:G	rs36023124	3	46039060	G	C	0.05908	1.535e-08	0.336	0.0594	0.929616	rs34901975	FYCO1	1743	intergenic	2.021	7	5	15	1	1
3:46039868:A:G	rs71615438	3	46039868	G	A	0.05908	1.489e-08	-0.3363	0.0594	0.929616	rs34901975	FYCO1	2551	intergenic	0.423	6	5	15	1	1
3:46041837:C:T	rs34754340	3	46041837	C	T	0.05908	1.303e-08	0.3378	0.0594	0.929616	rs34901975	FYCO1	4520	intergenic	6.396	6	5	15	1	1
3:46046459:A:G	rs34836513	3	46046459	G	A	0.05908	1.034e-08	0.3404	0.0595	0.929616	rs34901975	FYCO1	9142	intergenic	8.658	5	5	15	1	1
3:46047658:C:G	rs34283240	3	46047658	G	C	0.05908	1.159e-08	0.3392	0.0595	0.929616	rs34901975	FYCO1	10341	intergenic	10.27	5	2	15	0	1
3:46049764:A:G	rs76281521	3	46049764	G	A	0.05908	1.714e-08	0.3361	0.0596	0.929616	rs34901975	XCR1	8751	intergenic	0.217	5	5	15	1	1
3:46049765:C:T	rs13433997	3	46049765	C	T	0.1009	3.684e-08	-0.2634	0.0479	0.613245	rs6785091	XCR1	8750	intergenic	5.166	5	5	15	1	1
3:46049827:G:T	rs67937868	3	46049827	G	T	0.08934	5.948e-09	0.2856	0.0491	0.686001	rs6785091	XCR1	8688	intergenic	4.656	5	5	15	1	1
3:46051702:A:G	rs55875328	3	46051702	G	A	0.09078	7.241e-09	0.2835	0.049	0.672399	rs6785091	XCR1	6813	intergenic	2.562	5	5	15	1	1
3:46051774:A:G	rs67200151	3	46051774	G	A	0.09078	6.981e-09	0.2838	0.049	0.672399	rs6785091	XCR1	6741	intergenic	0.182	6	5	15	1	1
3:46051908:A:G	3:46051908:A:G	3	46051908	A	G	0.09078	NA	NA	NA	0.672399	rs6785091	XCR1	6607	intergenic	1.562	7	5	15	1	1
3:46051908:A:C	3:46051908:A:C	3	46051908	A	C	0.001441	NA	NA	NA	0.672399	rs6785091	XCR1	6607	NA	1.799	NA	5	15	1	0
3:46052263:C:G	rs13089855	3	46052263	G	C	0.09078	8.259e-09	0.2823	0.049	0.672399	rs6785091	XCR1	6252	intergenic	1.97	4	5	15	1	1
3:46052800:A:G	rs34493660	3	46052800	G	A	0.08934	5.765e-09	0.2874	0.0493	0.636281	rs6785091	XCR1	5715	intergenic	1.709	7	5	15	1	1
3:46053581:A:T	rs3851346	3	46053581	T	A	0.06052	1.237e-07	-0.3154	0.0596	0.907917	rs34901975	XCR1	4934	intergenic	9.602	7	5	15	1	1
3:46053968:A:G	rs35883205	3	46053968	G	A	0.06052	1.234e-07	-0.3154	0.0596	0.907917	rs34901975	XCR1	4547	intergenic	4.535	3a	5	15	1	1
3:46054156:G:T	rs61650989	3	46054156	G	T	0.08934	5.649e-09	0.2875	0.0493	0.636281	rs6785091	XCR1	4359	intergenic	2.512	6	5	15	1	0
3:46055250:A:G	rs35669129	3	46055250	G	A	0.09078	1.026e-08	0.2806	0.049	0.672399	rs6785091	XCR1	3265	intergenic	1.902	5	5	15	1	1
3:46055716:A:G	rs13081151	3	46055716	G	A	0.05908	7.825e-08	0.3303	0.0615	0.884025	rs34901975	XCR1	2799	intergenic	0.59	7	5	15	1	1
3:46055909:C:T	rs13081213	3	46055909	C	T	0.09078	1.027e-08	0.2806	0.049	0.672399	rs6785091	XCR1	2606	intergenic	1.319	6	5	15	1	0
3:46056162:A:G	rs34168660	3	46056162	G	A	0.09078	1.003e-08	0.2808	0.049	0.672399	rs6785091	XCR1	2353	intergenic	1.729	7	5	15	1	1
3:46056173:C:T	rs35751180	3	46056173	C	T	0.06052	2.204e-08	0.3269	0.0584	0.907917	rs34901975	XCR1	2342	intergenic	0.109	7	5	15	1	1
3:46056911:A:T	rs4362758	3	46056911	T	A	0.09078	1.049e-08	0.2804	0.049	0.672399	rs6785091	XCR1	1604	intergenic	0.195	5	5	15	1	1
3:46057233:A:C	rs35921206	3	46057233	C	A	0.09078	NA	NA	NA	0.672399	rs6785091	XCR1	1282	intergenic	1.896	5	5	15	1	1
3:46057867:A:G	rs73833520	3	46057867	G	A	0.09078	8.871e-09	-0.2818	0.049	0.672399	rs6785091	XCR1	648	downstream	1.623	5	5	15	1	1
3:46058908:A:G	rs71327006	3	46058908	G	A	0.06052	1.157e-07	0.3162	0.0597	0.907917	rs34901975	XCR1	0	UTR3	1.746	7	5	15	1	1
3:46059249:C:T	rs71327007	3	46059249	C	T	0.06052	1.283e-07	0.3151	0.0597	0.907917	rs34901975	XCR1	0	UTR3	7.083	4	5	15	1	1
3:46059484:C:T	rs35454877	3	46059484	C	T	0.09078	8.917e-09	-0.2817	0.049	0.672399	rs6785091	XCR1	0	UTR3	1.554	4	5	15	1	1
3:46061218:C:T	rs35334665	3	46061218	C	T	0.06052	1.086e-07	-0.3169	0.0597	0.907917	rs34901975	XCR1	0	UTR3	0.881	5	5	15	1	1
3:46061304:A:G	rs36040135	3	46061304	G	A	0.09078	8.917e-09	-0.2817	0.049	0.672399	rs6785091	XCR1	0	UTR3	5.338	4	5	15	1	1
3:46061840:A:G	rs13074382	3	46061840	G	A	0.09078	8.459e-09	-0.2822	0.049	0.672399	rs6785091	XCR1	0	UTR3	4.761	5	5	15	1	1
3:46061997:C:T	rs13097556	3	46061997	C	T	0.09078	1.133e-08	-0.2797	0.049	0.672399	rs6785091	XCR1	0	UTR3	1.161	5	5	15	1	1
3:46063329:C:T	rs2230322	3	46063329	C	T	0.09078	8.886e-09	-0.2815	0.049	0.672399	rs6785091	XCR1	0	exonic	10.39	NA	5	15	1	1
3:46063753:C:T	rs876668	3	46063753	C	T	0.09078	8.764e-09	-0.2822	0.0491	0.672399	rs6785091	XCR1	0	UTR5	1.135	NA	5	15	1	1
3:46064618:C:G	rs60019065	3	46064618	G	C	0.09078	1.186e-08	0.2797	0.0491	0.672399	rs6785091	XCR1	0	intronic	2.393	3a	1	15	1	1
3:46064626:C:G	rs71327009	3	46064626	G	C	0.06052	1.091e-07	-0.3171	0.0597	0.907917	rs34901975	XCR1	0	intronic	7.008	4	1	15	1	1
3:46065763:A:G	rs35930050	3	46065763	G	A	0.09078	8.986e-09	0.2818	0.049	0.672399	rs6785091	XCR1	0	intronic	7.874	2b	5	15	1	1
3:46065963:A:G	rs34584867	3	46065963	G	A	0.09078	8.986e-09	0.2818	0.049	0.672399	rs6785091	XCR1	0	intronic	0.757	5	5	15	1	1
3:46067507:G:T	rs35161099	3	46067507	G	T	0.06052	9.42e-08	-0.3185	0.0597	0.907917	rs34901975	XCR1	0	intronic	8.762	6	5	15	1	1
3:46068473:A:G	rs35159820	3	46068473	G	A	0.09078	5.528e-09	-0.2857	0.049	0.672399	rs6785091	XCR1	0	intronic	9.208	7	5	15	1	1
3:46068835:G:T	rs71327010	3	46068835	G	T	0.06052	8.637e-08	0.3195	0.0597	0.907917	rs34901975	XCR1	0	intronic	1.792	5	7	15	1	1
3:46069573:A:C	rs13090194	3	46069573	C	A	0.09078	5.592e-09	-0.2856	0.049	0.672399	rs6785091	XCR1	338	upstream	5.714	2b	7	9	1	1
3:46070337:C:G	rs59166269	3	46070337	G	C	0.09078	5.586e-09	-0.2856	0.049	0.672399	rs6785091	XCR1	1102	intergenic	2.252	6	9	15	1	1
3:46070353:A:C	rs57437758	3	46070353	C	A	0.09078	5.586e-09	-0.2856	0.049	0.672399	rs6785091	XCR1	1118	intergenic	4.205	7	9	15	1	1
3:46071081:A:G	rs34562820	3	46071081	G	A	0.06052	8.637e-08	0.3195	0.0597	0.907917	rs34901975	XCR1	1846	intergenic	8.692	5	5	15	1	1
3:46071763:C:T	rs13082697	3	46071763	C	T	0.09078	5.725e-09	-0.2855	0.049	0.672399	rs6785091	XCR1	2528	intergenic	10.87	4	5	15	1	1
3:46071868:A:G	rs13060287	3	46071868	G	A	0.09078	5.514e-09	-0.2857	0.049	0.672399	rs6785091	XCR1	2633	intergenic	9.369	4	5	15	1	1
3:46072519:A:G	rs34619093	3	46072519	G	A	0.06052	8.637e-08	0.3195	0.0597	0.907917	rs34901975	XCR1	3284	intergenic	6.557	7	5	15	1	1
3:46072630:C:T	rs68087193	3	46072630	C	T	0.09078	5.346e-09	0.286	0.049	0.672399	rs6785091	XCR1	3395	intergenic	4.132	5	5	15	1	1
3:46072704:A:G	rs2102055	3	46072704	G	A	0.09078	4.231e-09	0.2871	0.0489	0.672399	rs6785091	XCR1	3469	intergenic	7.687	5	5	15	1	1
3:46072768:A:G	rs2102056	3	46072768	G	A	0.09078	5.507e-09	0.2858	0.049	0.672399	rs6785091	XCR1	3533	intergenic	0.219	5	5	15	1	1
3:46072839:C:T	rs2088690	3	46072839	C	T	0.09078	5.514e-09	0.2857	0.049	0.672399	rs6785091	XCR1	3604	intergenic	4.321	5	5	15	1	1
3:46073314:C:T	rs34774687	3	46073314	C	T	0.09078	5.514e-09	-0.2857	0.049	0.672399	rs6785091	XCR1	4079	intergenic	3.335	7	5	15	1	1
3:46073923:A:G	rs35814488	3	46073923	G	A	0.09078	5.509e-09	-0.2857	0.049	0.672399	rs6785091	XCR1	4688	intergenic	3.113	7	5	15	1	1
3:46074588:G:GT	rs35467633	3	46074588	G	GT	0.0951	NA	NA	NA	0.657918	rs6785091	XCR1	5353	intergenic	6.59	NA	5	15	1	0
3:46074711:A:G	rs6790866	3	46074711	G	A	0.09078	5.509e-09	0.2857	0.049	0.672399	rs6785091	XCR1	5476	intergenic	7.245	6	5	15	1	0
3:46074858:A:G	rs6791016	3	46074858	G	A	0.09078	5.509e-09	0.2857	0.049	0.672399	rs6785091	XCR1	5623	intergenic	11.83	7	5	15	1	1
3:46075090:A:C	rs6780028	3	46075090	C	A	0.09078	5.493e-09	-0.2858	0.049	0.672399	rs6785091	XCR1	5855	intergenic	8.022	6	5	15	1	1
3:46077332:A:G	rs2088692	3	46077332	G	A	0.09078	4.44e-09	-0.2874	0.049	0.672399	rs6785091	XCR1	8097	intergenic	1.572	5	7	15	1	1
3:46079524:T:TTTTTG	rs199538350	3	46079524	T	TTTTTG	0.0562	NA	NA	NA	0.880039	rs34901975	XCR1	10289	intergenic	0.525	NA	13	15	0	0
3:46081306:C:T	rs34438204	3	46081306	C	T	0.06052	9.092e-08	-0.3189	0.0597	0.907917	rs34901975	XCR1	12071	intergenic	5.293	6	13	15	0	1
3:46082481:A:G	rs13063033	3	46082481	G	A	0.06052	8.925e-08	0.319	0.0597	0.907917	rs34901975	XCR1	13246	intergenic	3.047	6	9	15	0	0
3:46087992:A:G	rs34679077	3	46087992	G	A	0.06052	9.092e-08	0.3189	0.0597	0.907917	rs34901975	XCR1	18757	intergenic	8.121	3a	5	15	0	1
3:46094063:A:G	rs34863575	3	46094063	G	A	0.06052	1.397e-07	-0.314	0.0596	0.907917	rs34901975	XCR1	24828	intergenic	10.27	6	5	15	0	1
3:46094762:A:G	rs4339140	3	46094762	G	A	0.1196	NA	NA	NA	0.65433	rs6785091	XCR1	25527	intergenic	1.198	7	5	15	0	1
3:46095104:A:G	rs35772789	3	46095104	G	A	0.06052	2.43e-07	-0.3089	0.0598	0.907917	rs34901975	XCR1	25869	intergenic	7.114	7	5	15	0	1
3:46095219:A:G	rs79298034	3	46095219	A	G	0.05331	NA	NA	NA	0.834829	rs34901975	XCR1	25984	intergenic	0.327	6	5	15	0	1
3:46095222:C:T	rs183817891	3	46095222	C	T	0.04899	NA	NA	NA	0.76531	rs34901975	XCR1	25987	intergenic	2.24	NA	5	15	0	1
3:46095226:C:T	rs558116414	3	46095226	C	T	0.05331	NA	NA	NA	0.834829	rs34901975	XCR1	25991	intergenic	0.275	NA	5	15	0	1
3:46095227:A:G	rs73830715	3	46095227	A	G	0.07349	NA	NA	NA	0.612056	rs34901975	XCR1	25992	intergenic	0.42	7	5	15	0	1
3:46095336:C:T	rs34339943	3	46095336	T	C	0.06052	NA	NA	NA	0.907917	rs34901975	XCR1	26101	intergenic	11.31	5	5	15	0	1
3:46096043:A:G	rs34340587	3	46096043	G	A	0.06052	1.33e-06	0.3019	0.0624	0.907917	rs34901975	XCR1	26808	intergenic	1.741	6	5	15	0	1
3:46096798:C:T	rs77399277	3	46096798	C	T	0.06052	1.653e-07	-0.3122	0.0596	0.907917	rs34901975	XCR1	27563	intergenic	3.776	6	5	15	0	1
3:46098526:C:G	rs34718164	3	46098526	G	C	0.06052	1.65e-07	-0.3122	0.0596	0.907917	rs34901975	XCR1	29291	intergenic	5.402	6	5	15	0	1
3:46099154:C:T	rs13096741	3	46099154	C	T	0.06052	1.659e-07	0.3122	0.0596	0.907917	rs34901975	XCR1	29919	intergenic	0.587	5	5	15	0	1
3:46100138:C:G	rs35420565	3	46100138	G	C	0.06052	1.637e-07	-0.3123	0.0596	0.907917	rs34901975	XCR1	30903	intergenic	4.583	7	2	15	0	1
3:46100491:C:T	rs34047915	3	46100491	C	T	0.06052	1.644e-07	0.3123	0.0596	0.907917	rs34901975	XCR1	31256	intergenic	0.671	4	2	15	0	1
3:46101466:C:T	rs71327014	3	46101466	C	T	0.06052	1.638e-07	0.3123	0.0596	0.907917	rs34901975	XCR1	32231	intergenic	2.892	5	2	15	0	1
3:46102173:C:G	rs71327015	3	46102173	G	C	0.06052	1.632e-07	0.3124	0.0596	0.907917	rs34901975	XCR1	32938	intergenic	4.518	7	5	15	0	1
3:46103680:G:T	rs34127208	3	46103680	G	T	0.06052	1.638e-07	0.3123	0.0596	0.907917	rs34901975	XCR1	34445	intergenic	2.287	3a	5	15	0	1
3:46107498:A:G	rs35516580	3	46107498	G	A	0.06052	1.862e-07	-0.3108	0.0596	0.907917	rs34901975	XCR1	38263	intergenic	1.323	4	2	15	0	1
3:46107601:A:G	rs34766614	3	46107601	G	A	0.06052	1.377e-07	-0.3143	0.0597	0.907917	rs34901975	XCR1	38366	intergenic	7.69	5	5	15	0	1
3:46108285:C:T	rs9824651	3	46108285	C	T	0.1081	2.378e-06	0.2267	0.0481	0.604032	rs6785091	XCR1	39050	intergenic	3.416	5	5	15	0	1
3:46108400:A:G	rs9825081	3	46108400	G	A	0.1081	2.493e-06	0.2265	0.0481	0.604032	rs6785091	XCR1	39165	intergenic	0.799	5	5	15	0	1
3:46111081:A:G	rs9877748	3	46111081	G	A	0.1066	1.96e-06	-0.2295	0.0482	0.614542	rs6785091	XCR1	41846	intergenic	6.15	6	1	15	0	1
3:46111213:C:T	rs71327017	3	46111213	C	T	0.06196	2.436e-07	-0.308	0.0597	0.887105	rs34901975	XCR1	41978	intergenic	1.026	6	1	15	0	1
3:46111759:A:G	rs9845382	3	46111759	G	A	0.1066	1.975e-06	0.2294	0.0482	0.614542	rs6785091	XCR1	42524	intergenic	9.676	6	1	15	0	1
3:46114216:A:G	rs13069742	3	46114216	G	A	0.1066	2.262e-06	-0.228	0.0482	0.614542	rs6785091	XCR1	44981	intergenic	10.78	6	5	15	0	1
3:46116010:A:T	rs13072267	3	46116010	T	A	0.06196	2.554e-07	0.3072	0.0596	0.887105	rs34901975	XCR1	46775	intergenic	7.424	7	5	15	0	1
3:46116787:A:G	rs13098366	3	46116787	G	A	0.08501	2.414e-06	0.2326	0.0493	0.65167	rs34901975	XCR1	47552	intergenic	3.23	7	5	15	0	0
3:46117096:A:G	rs36057789	3	46117096	G	A	0.06196	3.379e-07	-0.3041	0.0596	0.887105	rs34901975	XCR1	47861	intergenic	3.505	6	5	15	0	1
3:46117960:A:G	rs76647202	3	46117960	G	A	0.06196	1.693e-07	-0.3124	0.0597	0.887105	rs34901975	XCR1	48725	intergenic	2.901	7	5	15	0	1
3:46118439:C:T	rs35951367	3	46118439	C	T	0.08213	2.675e-06	-0.2315	0.0493	0.675137	rs34901975	XCR1	49204	intergenic	4.15	3a	5	15	0	1
3:46120517:A:G	rs71327021	3	46120517	G	A	0.06196	2.557e-07	-0.3072	0.0596	0.887105	rs34901975	XCR1	51282	intergenic	2.561	4	1	15	0	1
3:46123043:A:G	rs13091868	3	46123043	G	A	0.06196	2.571e-07	-0.3073	0.0596	0.887105	rs34901975	XCR1	53808	intergenic	0.618	5	5	15	0	1
3:46123055:C:T	rs13092030	3	46123055	C	T	0.06196	2.63e-07	0.3071	0.0596	0.887105	rs34901975	XCR1	53820	intergenic	3.004	5	5	15	0	1
3:46123900:T:TAC	rs34278810	3	46123900	T	TAC	0.06196	NA	NA	NA	0.839132	rs34901975	XCR1	54665	intergenic	1.067	NA	5	15	0	0
3:46124418:A:G	rs17215981	3	46124418	G	A	0.06196	2.627e-07	-0.307	0.0596	0.887105	rs34901975	XCR1	55183	intergenic	5.459	4	5	15	0	1
3:46127557:A:G	rs13089554	3	46127557	G	A	0.06196	2.586e-07	0.3071	0.0596	0.887105	rs34901975	FLT1P1	56292	intergenic	5.415	5	5	15	0	1
3:46128542:A:G	rs13095717	3	46128542	G	A	0.06196	2.58e-07	0.3071	0.0596	0.887105	rs34901975	FLT1P1	55307	intergenic	2.721	5	5	15	0	1
3:46128709:C:T	rs13075528	3	46128709	C	T	0.06196	2.562e-07	-0.3072	0.0596	0.887105	rs34901975	FLT1P1	55140	intergenic	1.834	4	5	15	0	1
3:46128713:A:G	rs13095602	3	46128713	G	A	0.06196	2.562e-07	-0.3072	0.0596	0.887105	rs34901975	FLT1P1	55136	intergenic	0.583	5	5	15	0	1
3:46131225:C:G	rs71327023	3	46131225	G	C	0.06196	2.581e-07	-0.3071	0.0596	0.887105	rs34901975	FLT1P1	52624	intergenic	2.096	3a	2	15	0	1
3:46135690:A:G	rs13063527	3	46135690	G	A	0.06196	2.503e-07	0.3075	0.0596	0.887105	rs34901975	FLT1P1	48159	intergenic	3.563	5	5	15	0	1
3:46136438:A:G	rs13068570	3	46136438	G	A	0.0634	3.071e-07	-0.3053	0.0596	0.829768	rs34901975	FLT1P1	47411	intergenic	0.058	3a	2	15	0	1
3:46138107:A:G	rs1491950	3	46138107	G	A	0.06196	2.602e-07	0.3071	0.0596	0.887105	rs34901975	FLT1P1	45742	intergenic	2.19	5	2	15	0	1
3:46138455:A:G	rs4373103	3	46138455	G	A	0.06196	2.507e-07	0.3075	0.0596	0.887105	rs34901975	FLT1P1	45394	intergenic	0.284	5	2	15	0	1
3:46138842:A:T	rs34492478	3	46138842	T	A	0.06196	2.516e-07	-0.3072	0.0596	0.887105	rs34901975	FLT1P1	45007	intergenic	5.665	7	2	15	0	1
3:46140073:G:T	rs71327024	3	46140073	G	T	0.06196	2.505e-07	0.3075	0.0596	0.887105	rs34901975	FLT1P1	43776	intergenic	18.33	4	2	15	0	1
3:46142464:C:T	rs34460587	3	46142464	C	T	0.0634	2.454e-07	0.3077	0.0596	0.867127	rs34901975	FLT1P1	41385	intergenic	5.655	5	2	15	0	1
3:46143187:C:T	rs34452002	3	46143187	C	T	0.0634	2.456e-07	0.3077	0.0596	0.867127	rs34901975	FLT1P1	40662	intergenic	3.236	6	2	15	0	1
3:46144981:G:T	rs34093271	3	46144981	G	T	0.0634	2.468e-07	0.3076	0.0596	0.867127	rs34901975	FLT1P1	38868	intergenic	11.55	6	5	15	0	1
3:46146314:G:T	rs13093179	3	46146314	G	T	0.0634	2.481e-07	0.3075	0.0596	0.867127	rs34901975	FLT1P1	37535	intergenic	0.752	4	5	15	0	1
3:46147504:A:G	rs71327025	3	46147504	G	A	0.0634	2.463e-07	-0.3076	0.0596	0.867127	rs34901975	FLT1P1	36345	intergenic	9.595	5	5	15	0	1
3:46154272:C:T	rs35539222	3	46154272	C	T	0.0634	2.072e-07	-0.3103	0.0598	0.867127	rs34901975	FLT1P1	29577	intergenic	4.792	4	5	15	0	1
3:46154457:A:G	rs35110864	3	46154457	G	A	0.0634	2.07e-07	0.3103	0.0598	0.867127	rs34901975	FLT1P1	29392	intergenic	8.332	7	5	15	0	1
3:46169040:C:T	rs35464221	3	46169040	C	T	0.0634	1.032e-06	0.2947	0.0603	0.867127	rs34901975	FLT1P1	14809	intergenic	7.735	4	5	15	0	1
3:46170897:G:T	rs35581648	3	46170897	G	T	0.0634	9.569e-07	0.2959	0.0604	0.867127	rs34901975	FLT1P1	12952	intergenic	0.672	7	5	15	0	1
3:46172824:C:T	rs13085367	3	46172824	C	T	0.0634	7.206e-07	-0.2995	0.0604	0.867127	rs34901975	FLT1P1	11025	intergenic	3.91	6	1	15	0	1
3:46173072:C:G	rs13063635	3	46173072	G	C	0.0634	5.499e-07	0.3027	0.0604	0.867127	rs34901975	FLT1P1	10777	intergenic	1.634	6	1	15	0	1
3:46173210:G:T	rs71327027	3	46173210	G	T	0.0634	5.818e-07	-0.3019	0.0604	0.867127	rs34901975	FLT1P1	10639	intergenic	4.378	6	1	15	0	1
3:46173642:C:T	rs17282175	3	46173642	C	T	0.06484	2.172e-06	0.2778	0.0587	0.805873	rs34901975	FLT1P1	10207	intergenic	0.059	4	1	15	0	1
3:46174331:C:T	rs78380307	3	46174331	C	T	0.06196	7.484e-07	-0.2986	0.0603	0.843351	rs34901975	FLT1P1	9518	intergenic	2.328	5	2	15	1	1
3:46174605:A:G	rs17282238	3	46174605	G	A	0.06196	6.83e-07	-0.3025	0.0609	0.843351	rs34901975	FLT1P1	9244	intergenic	3.485	7	2	15	1	1
3:46176394:A:ATTGTTT	rs67491888	3	46176394	ATTGTTT	A	0.06052	5.177e-06	0.3015	0.0662	0.819735	rs34901975	FLT1P1	7455	intergenic	3.954	NA	2	15	1	1
3:46177096:A:G	rs13068572	3	46177096	G	A	0.06052	2.497e-06	0.2941	0.0625	0.819735	rs34901975	FLT1P1	6753	intergenic	0.454	5	2	15	1	1
3:46177992:C:T	rs4493469	3	46177992	C	T	0.0562	1.451e-06	-0.3096	0.0643	0.708201	rs34901975	FLT1P1	5857	intergenic	3.758	7	5	15	1	1
3:46192270:C:T	rs143995536	3	46192270	T	C	0.04755	NA	NA	NA	0.655663	rs34901975	FLT1P1	7100	intergenic	1.068	6	5	15	1	0
3:46194127:G:T	rs13096873	3	46194127	G	T	0.04755	NA	NA	NA	0.650585	rs34901975	FLT1P1	8957	intergenic	0.671	6	5	15	1	0
3:46194769:A:G	3:46194769:A:G	3	46194769	G	A	0.04899	NA	NA	NA	0.678122	rs34901975	FLT1P1	9599	intergenic	0.006	7	5	15	1	1
3:46194769:G:T	3:46194769:G:T	3	46194769	G	T	0.005764	NA	NA	NA	0.678122	rs34901975	FLT1P1	9599	NA	0.004	NA	5	15	1	0
3:46211920:G:GGCA	rs34940111	3	46211920	G	GGCA	0.05043	NA	NA	NA	0.658862	rs34901975	CCR3	0	intronic	1.24	NA	5	15	1	1
3:46244280:A:G	rs3136668	3	46244280	G	A	0.05187	NA	NA	NA	0.640522	rs34901975	CCR3:CCR1	00:00:00	UTR3	1.643	6	3	15	1	0
3:46244283:G:GA	rs375628669	3	46244283	GA	G	0.05187	NA	NA	NA	0.640522	rs34901975	CCR3:CCR1	00:00:00	UTR3	0.191	NA	3	15	1	0
3:46252886:A:T	rs533324341	3	46252886	A	T	0.005764	NA	NA	NA	0.612386	rs34901975	CCR3	0	intronic	3.864	NA	5	15	1	0
3:46252886:A:ATATT	rs142700036	3	46252886	ATATT	A	0.05764	NA	NA	NA	0.612386	rs34901975	CCR3	0	NA	1.346	NA	5	15	1	0
3:46263174:T:TGGGTTGGAGTA	rs138732762	3	46263174	T	TGGGTTGGAGTA	0.05187	NA	NA	NA	0.640522	rs34901975	CCR3	0	intronic	0.369	NA	2	15	1	1
6:41501205:C:CA	rs35157113	6	41501205	CA	C	0.4597	NA	NA	NA	0.870974	rs2477820	RP11-328M4.2	0	ncRNA_intronic	6.084	NA	5	14	1	0
6:41502992:A:T	rs2477820	6	41502992	T	A	0.4424	1.893e-08	-0.1789	0.0318	1	rs2477820	RP11-328M4.2	0	ncRNA_intronic	1.972	7	5	14	1	0
6:41504126:C:T	rs2496652	6	41504126	C	T	0.4265	3.029e-08	-0.1759	0.0318	0.936802	rs2477820	RP11-328M4.2	0	ncRNA_intronic	10.41	NA	5	14	1	0
6:41505948:A:AC	rs35616241	6	41505948	AC	A	0.4409	2.074e-07	-0.1803	0.0347	0.993926	rs2477820	RP11-328M4.2	0	ncRNA_intronic	4.186	NA	5	14	1	0
11:82470323:G:T	rs80287789	11	82470323	G	T	0.01009	8.897e-08	-0.8176	0.1529	1	rs77599934	FAM181B	25416	intergenic	1.658	7	5	15	0	0
11:82552787:C:T	rs75710930	11	82552787	T	C	0.008646	NA	NA	NA	0.854629	rs77599934	PRCP	0	intronic	4.826	6	4	5	1	0
11:82579852:A:G	rs80354954	11	82579852	G	A	0.01153	NA	NA	NA	0.872426	rs77599934	PRCP	0	intronic	4.098	7	5	5	1	0
11:82612888:C:G	rs78295364	11	82612888	G	C	0.01153	3.792e-06	0.7241	0.1566	0.872426	rs77599934	PRCP:C11orf82	00:00:00	intronic	6.471	4	1	1	1	0
11:82617917:A:G	rs77599934	11	82617917	G	A	0.01009	2.259e-08	-0.8228	0.1472	1	rs77599934	PRCP:C11orf82	00:00:00	intronic	2.59	5	1	15	1	0
11:82645422:A:G	rs79881497	11	82645422	A	G	0.008646	NA	NA	NA	0.854629	rs77599934	PRCP:C11orf82	00:00:00	UTR3	14.21	6	4	15	1	0
11:82682464:G:GA	rs150348896	11	82682464	GA	G	0.008646	NA	NA	NA	0.854629	rs77599934	RP11-659G9.3	0	ncRNA_intronic	2.652	NA	1	15	1	0
11:82709783:C:T	rs76763611	11	82709783	C	T	0.008646	NA	NA	NA	0.854629	rs77599934	RP11-659G9.3:RAB30	00:00:00	ncRNA_intronic	1.018	5	4	5	1	0
11:82732175:C:T	rs116119450	11	82732175	T	C	0.008646	NA	NA	NA	0.854629	rs77599934	RP11-659G9.3:RAB30	00:00:00	ncRNA_intronic	3.338	5	4	15	1	0
11:82735011:A:G	rs77846944	11	82735011	G	A	0.008646	NA	NA	NA	0.854629	rs77599934	RP11-659G9.3:RAB30	00:00:00	ncRNA_intronic	2.851	6	5	15	1	0
11:82765160:A:G	rs76212468	11	82765160	G	A	0.008646	NA	NA	NA	0.854629	rs77599934	RAB30	0	intronic	4.369	4	5	7	1	0
11:82803127:C:G	rs143151204	11	82803127	C	G	0.008646	NA	NA	NA	0.854629	rs77599934	RAB30-AS1:RP11-113K21.4	00:00:00	ncRNA_exonic	0.002	6	5	15	1	0
11:82816711:C:T	rs75205666	11	82816711	C	T	0.008646	NA	NA	NA	0.854629	rs77599934	RAB30-AS1	0	ncRNA_intronic	0.973	7	5	15	1	0
