# Supplementary material for: Novel risk loci for COVID-19 hospitalization among admixed American populations
Source: eLife. 2024 Oct 3;13:RP93666. doi: 10.7554/eLife.93666 (PMC11449485; doi:10.7554/eLife.93666)
Supplement: Supplementary file 4. — NSNPS: number of SNPs in the gene; NPARAM: the number of relevant parameters used in the model; ZSTAT: z statistics. [file elife-93666-supp4.xlsx]

## Sheet: Supplementary Table 4. 
Supplementary Table 4. Results from the MAGMA gene-based analysis in the SC-HGI_AMR GWAS meta-analysis (hg37). NSNPS: number of SNPs in the gene; NPARAM: the number of relevant parameteres used in the model; ZSTAT: z statistics.
GENE	CHR	START	STOP	NSNPS	NPARAM	ZSTAT	P	SYMBOL
ENSG00000163818	3	45864808	45957534	225	29	7.4578	4.3985e-14	LZTFL1
ENSG00000173578	3	46058516	46069234	36	6	5.8012	3.2919e-09	XCR1
ENSG00000163820	3	45959396	46037316	271	19	5.4864	2.0507e-08	FYCO1
ENSG00000173585	3	45927996	45944667	42	10	5.2737	6.6836e-08	CCR9
ENSG00000123636	2	160175490	160473203	1015	47	5.1862	1.0732e-07	BAZ2B
ENSG00000159110	21	34602206	34637980	127	14	4.6758	1.4642e-06	IFNAR2
ENSG00000249624	21	34619079	34655517	101	25	4.3643	6.3772e-06	AP000295.9
ENSG00000241837	21	35275757	35288284	46	10	4.1943	1.3684e-05	ATP5O
ENSG00000131400	19	50861734	50869087	16	4	4.1281	1.8291e-05	NAPSA
ENSG00000183625	3	46205096	46308197	455	24	4.0759	2.2916e-05	CCR3
ENSG00000163823	3	46243200	46249887	15	3	3.9847	3.3788e-05	CCR1
ENSG00000131408	19	50832910	50886239	159	20	3.8554	5.7768e-05	NR1H2
ENSG00000141934	19	281040	291393	55	14	3.6505	0.00013086	PPAP2C
ENSG00000172215	3	45982425	45989845	19	7	3.569	0.00017914	CXCR6
ENSG00000109332	4	103715540	103790053	208	10	3.5094	0.00022459	UBE2D3
ENSG00000178217	10	82297658	82406316	577	47	3.49	0.00024149	SH2D4B
ENSG00000164037	4	103806205	103940896	335	10	3.485	0.00024603	SLC9B1
ENSG00000109758	4	3443614	3451211	43	12	3.4456	0.00028492	HGFAC
ENSG00000180304	15	64979772	64995480	25	6	3.4338	0.00029761	OAZ2
ENSG00000084623	1	32687529	32697205	12	2	3.4147	0.00031926	EIF3I
ENSG00000164841	8	109619079	109799844	618	35	3.4128	0.00032146	TMEM74
ENSG00000196391	15	90895477	90909324	76	11	3.4106	0.00032411	ZNF774
ENSG00000164038	4	103941025	104006986	97	22	3.374	0.00037047	SLC9B2
ENSG00000165617	14	59100685	59115039	32	8	3.3428	0.0004147	DACT1
ENSG00000107242	9	71320575	71624092	960	43	3.3333	0.00042907	PIP5K1B
ENSG00000235878	21	47612391	47613673	2	1	3.3332	0.00042929	AP001468.1
ENSG00000160055	1	32680073	32687972	8	2	3.3311	0.00043251	TMEM234
ENSG00000145354	4	103790135	103810399	76	6	3.2947	0.00049256	CISD2
ENSG00000160051	1	32671236	32674288	5	1	3.292	0.00049737	IQCC
ENSG00000130175	19	11546109	11561783	36	9	3.2788	0.00052131	PRKCSH
ENSG00000088538	3	50712672	51421629	1629	20	3.2708	0.00053629	DOCK3
ENSG00000154358	1	228395831	228566577	693	25	3.2461	0.00058503	OBSCN
ENSG00000084652	1	32645287	32663886	29	7	3.2443	0.0005887	TXLNA
ENSG00000198003	19	11531272	11546603	35	9	3.2428	0.0005918	CCDC151
ENSG00000025800	1	32573639	32642169	94	9	3.2366	0.00060485	KPNA6
ENSG00000119688	14	74752126	74769759	117	5	3.2346	0.00060904	ABCD4
ENSG00000114738	3	50648951	50686720	75	10	3.2271	0.00062526	MAPKAPK3
ENSG00000120549	10	23983675	24836772	3113	127	3.1609	0.00078649	KIAA1217
ENSG00000179152	3	44379611	44450943	143	12	3.1486	0.00082023	TCAIM
ENSG00000136653	1	206680879	206762616	276	35	3.1449	0.0008306	RASSF5
ENSG00000160781	1	156213206	156217881	7	3	3.1347	0.00086005	PAQR6
ENSG00000269738	9	125148344	125148928	4	2	3.1249	0.00088922	AL162424.1
ENSG00000159388	1	203274619	203278730	8	3	3.1164	0.00091523	BTG2
ENSG00000124782	6	7107830	7252213	375	40	3.1076	0.00094301	RREB1
ENSG00000187871	6	55192267	55267291	661	22	3.0799	0.0010354	GFRAL
ENSG00000140575	15	90931450	91045475	342	20	3.0604	0.0011052	IQGAP1
ENSG00000112531	6	163835032	163999628	516	24	3.0585	0.0011123	QKI
ENSG00000198417	16	56691606	56694610	8	4	3.049	0.0011479	MT1F
ENSG00000163808	3	44803209	44914868	173	23	3.0485	0.0011498	KIF15
ENSG00000268865	12	25055243	25057615	12	5	3.0329	0.0012112	AC026310.1
ENSG00000121775	1	32537632	32568467	49	7	3.0322	0.001214	TMEM39B
ENSG00000158555	11	75145685	75236948	254	24	3.0301	0.0012222	GDPD5
ENSG00000182912	21	45937099	45945835	41	7	3.0268	0.0012356	C21orf90
ENSG00000127080	9	95375466	95432547	166	17	3.0268	0.0012357	IPPK
ENSG00000132153	3	47844399	47891685	51	9	3.0267	0.0012364	DHX30
ENSG00000177683	7	108194987	108210194	38	7	3.0262	0.0012383	THAP5
ENSG00000183615	1	32712834	32714457	1	1	3.0171	0.001276	FAM167B
ENSG00000198914	2	105471969	105476929	7	2	3.0141	0.0012885	POU3F3
ENSG00000124587	6	42931608	42946958	60	9	3.0036	0.0013341	PEX6
ENSG00000047849	3	47892182	48130769	301	17	3.0033	0.0013353	MAP4
ENSG00000107331	9	139901686	139923367	41	12	3.0011	0.0013451	ABCA2
ENSG00000258945	14	85994943	85995730	5	2	2.9988	0.0013554	RP11-497E19.2
ENSG00000174799	4	56815037	56899529	198	19	2.9911	0.0013898	CEP135
ENSG00000066422	3	101367733	101396339	63	11	2.9824	0.00143	ZBTB11
ENSG00000231924	19	43370616	43383974	34	3	2.9799	0.0014416	PSG1
ENSG00000248672	2	160628362	160761221	596	36	2.9777	0.0014523	LY75-CD302
ENSG00000054219	2	160628362	160761260	596	36	2.9777	0.0014523	LY75
ENSG00000173473	3	47626762	47823596	240	11	2.971	0.0014842	SMARCC1
ENSG00000163785	3	133784147	133969689	617	25	2.9667	0.0015051	RYK
ENSG00000168124	16	3254247	3255188	4	2	2.9662	0.0015073	OR1F1
ENSG00000143486	1	206744620	206785904	119	23	2.962	0.0015282	EIF2D
ENSG00000132010	19	12203658	12251222	115	18	2.9596	0.0015402	ZNF20
ENSG00000124713	6	42928496	42931618	12	4	2.9588	0.0015441	GNMT
ENSG00000021300	11	73357223	73373864	80	16	2.9571	0.0015526	PLEKHB1
ENSG00000255394	8	11618896	11620309	13	5	2.95	0.0015887	C8orf49
ENSG00000142327	2	241505221	241520789	50	17	2.9468	0.0016053	RNPEPL1
ENSG00000163462	1	155145873	155157447	17	5	2.937	0.0016568	TRIM46
ENSG00000173769	3	44283378	44373590	191	9	2.9281	0.001705	TOPAZ1
ENSG00000166831	15	65032091	65067786	100	13	2.9134	0.0017878	RBPMS2
ENSG00000020129	1	36023074	36032875	16	4	2.9052	0.001835	NCDN
ENSG00000267976	21	37858165	37860058	15	8	2.8775	0.0020042	AP000695.1
ENSG00000273088	1	155141885	155159748	32	8	2.8768	0.0020084	RP11-201K10.3
ENSG00000104833	19	6494330	6502859	23	10	2.8715	0.0020425	TUBB4A
ENSG00000008196	6	50786436	50815326	81	15	2.8704	0.00205	TFAP2B
ENSG00000171488	1	90098631	90235462	327	21	2.864	0.0020915	LRRC8C
ENSG00000182504	3	101442769	101489406	95	12	2.8592	0.0021235	CEP97
ENSG00000128274	22	43088127	43117304	175	21	2.8555	0.0021487	A4GALT
ENSG00000168228	4	25314407	25372005	186	19	2.8513	0.0021769	ZCCHC4
ENSG00000214189	19	12203078	12248050	108	17	2.8489	0.0021934	ZNF788
ENSG00000128590	7	108210012	108215294	17	7	2.8469	0.0022072	DNAJB9
ENSG00000104826	19	49519237	49520338	10	2	2.8346	0.0022938	LHB
ENSG00000197217	8	23243296	23315208	260	24	2.83	0.0023276	ENTPD4
ENSG00000142687	1	35899091	36023551	188	13	2.8289	0.0023353	KIAA0319L
ENSG00000168772	4	105389469	105416058	46	10	2.8211	0.0023932	CXXC4
ENSG00000259803	16	89262406	89268072	22	6	2.8179	0.0024172	SLC22A31
ENSG00000220256	2	240684554	240724577	282	22	2.814	0.0024465	AC093802.1
ENSG00000134107	3	5020801	5027008	16	3	2.8049	0.0025166	BHLHE40
ENSG00000104827	19	49526126	49527590	6	1	2.8014	0.0025438	CGB
ENSG00000112578	6	41888926	41900784	20	9	2.8013	0.0025446	BYSL
ENSG00000222046	1	32674695	32681797	6	2	2.7892	0.002642	DCDC2B
ENSG00000198087	6	47445525	47594999	384	13	2.7849	0.0026769	CD2AP
ENSG00000134202	1	110276554	110284384	18	4	2.7711	0.0027938	GSTM3
ENSG00000107187	9	139088096	139096955	27	8	2.7673	0.0028258	LHX3
ENSG00000103769	15	66018392	66184329	388	20	2.7642	0.0028533	RAB11A
ENSG00000143954	2	79252812	79255631	20	6	2.7563	0.0029232	REG3G
ENSG00000162931	1	228595641	228604562	19	7	2.7539	0.0029441	TRIM17
ENSG00000103174	16	5074845	5084142	36	10	2.7436	0.0030389	NAGPA
ENSG00000141452	18	21083473	21111746	66	11	2.7324	0.0031434	C18orf8
ENSG00000170848	19	43406231	43423715	36	4	2.7297	0.0031697	PSG6
ENSG00000145864	5	160715436	160976050	744	41	2.7195	0.003269	GABRB2
ENSG00000132170	3	12328867	12475855	440	26	2.7191	0.0032727	PPARG
ENSG00000131398	19	50815194	50836772	65	18	2.7184	0.0032798	KCNC3
ENSG00000111816	6	116252312	116381921	302	23	2.7164	0.0032995	FRK
ENSG00000151365	11	77774907	77779397	25	3	2.7132	0.0033318	THRSP
ENSG00000185559	14	101192042	101201539	23	8	2.7066	0.0033988	DLK1
ENSG00000166105	11	134144139	134189458	138	26	2.7046	0.0034191	GLB1L3
ENSG00000163738	4	74979891	75168816	418	29	2.7041	0.0034243	MTHFD2L
ENSG00000187546	7	15239943	15601640	1539	67	2.7023	0.0034429	AGMO
ENSG00000169231	1	155165379	155178842	14	3	2.7013	0.0034533	THBS3
ENSG00000153253	2	165944032	166060577	308	24	2.6983	0.0034846	SCN3A
ENSG00000143870	2	10923517	10978103	414	20	2.6959	0.0035098	PDIA6
ENSG00000235863	6	33244917	33252609	28	8	2.6921	0.0035502	B3GALT4
ENSG00000111846	6	10492456	10629601	624	56	2.6884	0.0035899	GCNT2
ENSG00000114735	3	50606583	50622366	30	8	2.6829	0.0036488	HEMK1
ENSG00000105088	19	9964394	10047228	327	33	2.6777	0.0037066	OLFM2
ENSG00000114646	3	47603729	47622282	21	5	2.6757	0.0037287	CSPG5
ENSG00000103671	15	64679947	64747502	144	21	2.6737	0.0037509	TRIP4
ENSG00000060982	12	24964295	25102393	596	44	2.6734	0.0037547	BCAT1
ENSG00000146463	1	35734568	35887659	249	14	2.6709	0.0037826	ZMYM4
ENSG00000198435	9	140194083	140196703	3	1	2.6705	0.0037871	NRARP
ENSG00000116560	1	35641979	35658749	54	7	2.6703	0.0037887	SFPQ
ENSG00000140044	14	75894419	75940814	174	23	2.6687	0.0038076	JDP2
ENSG00000134318	2	11319887	11488456	517	19	2.6665	0.0038326	ROCK2
ENSG00000164049	3	48413709	48442666	60	4	2.6609	0.0038967	FBXW12
ENSG00000184436	22	21353393	21356485	4	2	2.6596	0.0039121	THAP7
ENSG00000082482	1	215179118	215410436	772	34	2.6558	0.0039564	KCNK2
ENSG00000072571	5	162887209	162918947	99	18	2.6508	0.0040156	HMMR
ENSG00000159479	1	43849588	43855479	5	3	2.6471	0.0040596	MED8
ENSG00000198502	6	32485120	32498064	3	1	2.647	0.0040602	HLA-DRB5
ENSG00000146352	6	123317116	123394072	193	18	2.6464	0.0040682	CLVS2
ENSG00000164082	3	51741086	51752629	7	4	2.6415	0.0041272	GRM2
ENSG00000112319	6	133561736	133853258	1187	58	2.6314	0.0042522	EYA4
ENSG00000103742	15	65673802	65715410	111	25	2.6293	0.0042775	IGDCC4
ENSG00000114737	3	50643921	50649262	9	3	2.6264	0.004315	CISH
ENSG00000134452	10	5931535	5979556	191	16	2.626	0.0043193	FBXO18
ENSG00000105738	19	38397868	38699012	1045	49	2.6212	0.0043815	SIPA1L3
ENSG00000162408	1	6581407	6614595	139	6	2.6205	0.00439	NOL9
ENSG00000117408	1	44412611	44433694	42	8	2.619	0.004409	IPO13
ENSG00000173918	17	77018896	77045870	142	17	2.6186	0.0044142	C1QTNF1
ENSG00000162062	16	2510081	2514964	9	4	2.6167	0.0044387	C16orf59
ENSG00000182325	8	145579091	145583036	11	3	2.6151	0.0044598	FBXL6
ENSG00000154265	17	67240452	67323385	197	15	2.6094	0.0045353	ABCA5
ENSG00000178623	2	241544848	241570676	115	30	2.6085	0.004547	GPR35
ENSG00000180357	15	64752941	64978264	516	20	2.6067	0.0045714	ZNF609
ENSG00000158104	12	122277433	122301502	78	13	2.6048	0.004596	HPD
ENSG00000188095	15	90303822	90321982	115	10	2.6042	0.004605	MESP2
ENSG00000039650	19	50364461	50371166	20	8	2.5981	0.0046864	PNKP
ENSG00000256229	19	20278037	20311299	138	12	2.5975	0.0046948	ZNF486
ENSG00000178149	3	49052921	49059726	6	3	2.5967	0.0047055	DALRD3
ENSG00000163807	3	44779153	44803154	30	8	2.5952	0.0047273	KIAA1143
ENSG00000100030	22	22108789	22221970	310	21	2.594	0.0047428	MAPK1
ENSG00000271949	1	90098699	90398809	684	45	2.5916	0.0047764	RP11-302M6.4
ENSG00000272414	4	77172874	77232282	312	23	2.5886	0.0048189	FAM47E-STBD1
ENSG00000155330	16	46830519	46865323	20	3	2.5861	0.0048528	C16orf87
ENSG00000115520	2	198318147	198340032	28	9	2.5853	0.0048651	COQ10B
ENSG00000116819	1	36038971	36060929	32	10	2.5844	0.0048779	TFAP2E
ENSG00000117407	1	44398992	44402913	11	4	2.5758	0.0050006	ARTN
ENSG00000173175	3	123001143	123168605	550	43	2.574	0.0050264	ADCY5
ENSG00000139318	12	89741009	89747048	32	6	2.5698	0.0050877	DUSP6
ENSG00000180974	11	5905501	5906527	7	2	2.5684	0.0051081	OR52E4
ENSG00000112964	5	42423879	42721979	787	43	2.5672	0.0051266	GHR
ENSG00000118491	6	144185573	144259483	203	26	2.5668	0.0051314	ZC2HC1B
ENSG00000136193	7	29959719	30029905	183	15	2.5661	0.0051425	SCRN1
ENSG00000013375	6	83870869	83903655	64	13	2.5628	0.0051917	PGM3
ENSG00000167658	19	3976054	3985467	30	8	2.5594	0.0052429	EEF2
ENSG00000140464	15	74287014	74340153	140	15	2.5588	0.0052523	PML
ENSG00000188312	9	95087766	95382815	787	20	2.5555	0.0053013	CENPP
ENSG00000105376	19	10400657	10407454	22	5	2.555	0.0053097	ICAM5
ENSG00000239605	2	47272677	47382517	653	52	2.5538	0.0053273	C2orf61
ENSG00000145868	5	147763498	147822399	134	17	2.5503	0.0053817	FBXO38
ENSG00000110243	11	116660083	116663136	12	4	2.5454	0.0054578	APOA5
ENSG00000135241	7	108110866	108210110	258	19	2.5404	0.0055355	PNPLA8
ENSG00000187866	9	71394964	71398609	8	3	2.5401	0.0055414	FAM122A
ENSG00000106809	9	95146249	95166978	50	6	2.5391	0.0055568	OGN
ENSG00000212719	17	21428051	21477722	105	11	2.5351	0.0056205	C17orf51
ENSG00000142330	2	241526133	241557122	159	20	2.5331	0.005653	CAPN10
ENSG00000175455	3	123616152	123680564	188	12	2.5302	0.0056991	CCDC14
ENSG00000118804	4	77172886	77232752	316	22	2.5287	0.005724	FAM47E-STBD1
ENSG00000185033	15	90703836	90772911	365	27	2.5258	0.0057725	SEMA4B
ENSG00000183086	7	74379083	74438803	1	1	2.5255	0.005776	GATSL1
ENSG00000173171	1	155178490	155183615	6	3	2.525	0.0057848	MTX1
ENSG00000136868	9	115983808	116028674	138	19	2.5151	0.0059499	SLC31A1
ENSG00000213297	19	12242932	12267546	50	8	2.5145	0.0059607	ZNF625-ZNF20
ENSG00000092068	14	23594504	23652883	191	39	2.5125	0.0059936	SLC7A8
ENSG00000163749	4	77234154	77343021	612	14	2.5106	0.0060269	CCDC158
ENSG00000257591	19	12251032	12267546	35	7	2.5103	0.006031	ZNF625
ENSG00000102924	16	49311828	49315742	11	4	2.507	0.0060877	CBLN1
ENSG00000169180	16	28109300	28223241	287	12	2.5065	0.006096	XPO6
ENSG00000151414	1	198126093	198291550	620	24	2.5057	0.0061096	NEK7
ENSG00000112576	6	41902671	42018095	404	47	2.5029	0.0061596	CCND3
ENSG00000140577	15	91073157	91188577	458	23	2.502	0.0061751	CRTC3
ENSG00000204673	19	50372295	50381716	18	4	2.4972	0.0062589	AKT1S1
ENSG00000214237	3	150588832	150612089	70	14	2.4925	0.0063431	FAM188B2
ENSG00000163947	3	56761446	57113357	1355	91	2.4901	0.0063846	ARHGEF3
ENSG00000081870	1	54382247	54411602	64	7	2.4851	0.0064766	HSPB11
ENSG00000188474	19	12203078	12225491	54	10	2.4833	0.0065077	ZNF788
ENSG00000134853	4	55095264	55164414	194	12	2.4813	0.0065455	PDGFRA
ENSG00000172209	7	107110463	107116098	9	4	2.4789	0.0065901	GPR22
ENSG00000118369	11	77899858	77925757	79	14	2.4764	0.0066349	USP35
ENSG00000133063	1	203181955	203242769	209	29	2.4763	0.0066383	CHIT1
ENSG00000118454	1	70726271	70820417	173	26	2.4751	0.0066594	ANKRD13C
ENSG00000184774	1	202789394	202796353	29	4	2.4738	0.0066834	RP11-480I12.4
ENSG00000106682	7	73588575	73611431	56	11	2.4727	0.0067045	EIF4H
ENSG00000078328	16	6069095	7763340	12634	263	2.4716	0.0067263	RBFOX1
ENSG00000092820	6	159186773	159240444	236	11	2.4695	0.0067655	EZR
ENSG00000157216	1	54691105	54879152	595	71	2.4683	0.0067881	SSBP3
ENSG00000012223	3	46477136	46526724	205	22	2.4683	0.0067881	LTF
ENSG00000106080	7	30050203	30066300	32	7	2.4669	0.0068138	FKBP14
ENSG00000160563	9	134735494	134955295	417	28	2.4645	0.0068603	MED27
ENSG00000049618	6	157099063	157531913	1210	73	2.4642	0.0068652	ARID1B
ENSG00000138294	10	51549498	51562517	4	2	2.4635	0.0068796	MSMB
ENSG00000132139	17	34071530	34079897	29	7	2.4569	0.0070076	GAS2L2
ENSG00000129048	3	132316081	132337811	54	14	2.4564	0.0070173	ACKR4
ENSG00000133275	19	1941188	1981337	178	17	2.4512	0.0071185	CSNK1G2
ENSG00000136169	13	50018429	50069138	182	16	2.4487	0.0071696	SETDB2
ENSG00000221914	8	26149007	26230196	228	29	2.4482	0.0071796	PPP2R2A
ENSG00000181467	3	152880029	152886265	11	5	2.4471	0.0071998	RAP2B
ENSG00000157823	15	90373831	90437574	159	16	2.4467	0.0072092	AP3S2
ENSG00000110693	11	15987995	16761138	1824	45	2.4458	0.0072274	SOX6
ENSG00000179344	6	32627244	32636160	141	14	2.4436	0.0072714	HLA-DQB1
ENSG00000164393	6	47624172	47665533	223	6	2.4425	0.0072925	GPR111
ENSG00000100429	22	50683612	50689834	21	5	2.4422	0.0072993	HDAC10
ENSG00000249209	21	34956993	35284635	751	58	2.4393	0.0073571	AP000304.12
ENSG00000155393	16	50099852	50140298	140	13	2.4391	0.0073617	HEATR3
ENSG00000105668	19	36157715	36169367	50	9	2.438	0.0073849	UPK1A
ENSG00000182866	1	32716840	32751766	50	11	2.4375	0.007395	LCK
ENSG00000142973	1	47223510	47285085	190	28	2.4356	0.0074326	CYP4B1
ENSG00000184007	1	32372022	32410457	67	13	2.4337	0.0074722	PTP4A2
ENSG00000169777	5	9629109	9712490	268	32	2.4315	0.0075182	TAS2R1
ENSG00000088543	3	50595462	50608458	26	8	2.4284	0.007582	C3orf18
ENSG00000101158	20	57556263	57570188	38	7	2.4269	0.0076137	NELFCD
ENSG00000105997	7	27145803	27192200	119	18	2.4258	0.0076381	HOXA3
ENSG00000104953	19	2977444	2995177	93	19	2.4189	0.007784	TLE6
ENSG00000133111	13	37393361	37403241	19	4	2.4079	0.0080223	RFXAP
ENSG00000143322	1	179068462	179198819	343	19	2.4028	0.0081361	ABL2
ENSG00000250021	15	90377540	90456114	220	15	2.4024	0.008145	C15orf38-AP3S2
ENSG00000176715	16	89154783	89222254	371	17	2.4023	0.0081453	ACSF3
ENSG00000162894	1	207077731	207096592	38	8	2.3917	0.0083856	FAIM3
ENSG00000065717	19	2997636	3047633	265	45	2.3901	0.0084228	TLE2
ENSG00000153294	6	47653600	47689757	166	8	2.3887	0.0084543	GPR115
ENSG00000197852	1	112223252	112298446	292	33	2.3881	0.0084682	FAM212B
ENSG00000095303	9	125132824	125157982	140	19	2.3847	0.0085469	PTGS1
ENSG00000273269	2	47293080	47403650	618	48	2.3845	0.0085512	RP11-761B3.1
ENSG00000138078	2	44543420	44589001	169	24	2.3824	0.0086007	PREPL
ENSG00000164627	6	39297766	39693181	1341	57	2.3823	0.0086014	KIF6
ENSG00000187193	16	56716336	56718108	12	4	2.3814	0.0086224	MT1X
ENSG00000185453	19	48673949	48700877	102	19	2.3805	0.0086455	C19orf68
ENSG00000100053	22	25595817	25603330	29	11	2.3795	0.0086683	CRYBB3
ENSG00000104518	8	144635377	144645232	45	14	2.3766	0.0087372	GSDMD
ENSG00000137161	6	42896938	42907025	32	9	2.375	0.0087751	CNPY3
ENSG00000258941	14	39703106	39820397	396	23	2.374	0.0087983	RP11-407N17.3
ENSG00000164366	5	196986	218330	119	16	2.3708	0.0088739	CCDC127
ENSG00000111664	12	6949118	6956557	11	6	2.3696	0.0089027	GNB3
ENSG00000146618	7	19184405	19185044	1	1	2.3689	0.00892	FERD3L
ENSG00000204856	12	110906169	110928190	38	8	2.3684	0.0089327	FAM216A
ENSG00000213471	15	90792762	90808199	71	7	2.3668	0.0089703	TTLL13
ENSG00000197119	14	100757448	100772884	36	8	2.3655	0.009002	SLC25A29
ENSG00000115540	2	198380295	198418423	57	10	2.3626	0.0090736	MOB4
ENSG00000188483	9	131937835	131940540	5	2	2.3555	0.0092491	IER5L
ENSG00000170364	3	4344988	4359251	48	15	2.3539	0.0092899	SETMAR
ENSG00000172216	20	48807376	48809212	3	2	2.3515	0.009348	CEBPB
ENSG00000101446	20	44141101	44144264	10	4	2.3491	0.0094098	SPINT3
ENSG00000173662	1	6615241	6639817	88	18	2.3449	0.0095159	TAS1R1
ENSG00000100813	14	23527773	23564823	116	17	2.3445	0.0095255	ACIN1
ENSG00000185803	8	145577795	145584932	20	5	2.3444	0.0095281	SLC52A2
ENSG00000180549	9	139924626	139927462	9	3	2.3434	0.0095545	FUT7
ENSG00000114391	3	101399935	101405626	15	6	2.3401	0.0096385	RPL24
ENSG00000241553	3	9834179	9849410	40	11	2.3365	0.0097316	ARPC4
ENSG00000226887	4	53588785	53617807	43	4	2.3361	0.0097435	ERVMER34-1
ENSG00000231500	6	33239787	33244287	23	5	2.3337	0.0098047	RPS18
ENSG00000171533	11	75297963	75380165	163	21	2.3321	0.0098487	MAP6
ENSG00000144815	3	101498046	101547073	84	11	2.3308	0.0098811	NXPE3
ENSG00000111231	12	110890289	110907073	25	5	2.3303	0.0098939	GPN3
ENSG00000214597	8	145575878	145578574	10	3	2.3288	0.0099335	TMEM249
ENSG00000162976	2	11295324	11319000	114	20	2.3288	0.0099342	PQLC3
ENSG00000163463	1	155141884	155145951	11	3	2.3271	0.009981	KRTCAP2
ENSG00000254004	19	37001597	37019562	44	8	2.327	0.0099826	ZNF260
ENSG00000213626	2	30454397	30546596	401	36	2.3256	0.010019	LBH
ENSG00000111667	12	6961292	6975796	26	7	2.3248	0.01004	USP5
ENSG00000255384	11	118303836	118305921	1	1	2.3196	0.01018	RP11-770J1.4
ENSG00000100652	14	70242134	70264006	72	13	2.319	0.010197	SLC10A1
ENSG00000083097	6	83777385	83881069	234	18	2.3185	0.010211	DOPEY1
ENSG00000131634	16	1578689	1605581	107	12	2.3183	0.010217	TMEM204
ENSG00000107281	9	139933922	139940655	13	4	2.3163	0.010272	NPDC1
ENSG00000162365	1	47603107	47615413	57	10	2.3161	0.010276	CYP4A22
ENSG00000261147	15	90792788	90815440	83	10	2.3153	0.010298	RP11-697E2.6
ENSG00000133958	14	93799565	94174222	856	34	2.3151	0.010304	UNC79
ENSG00000116754	1	70671365	70718735	63	8	2.3144	0.010322	SRSF11
ENSG00000144355	2	172949468	172954405	7	4	2.3129	0.010365	DLX1
ENSG00000111669	12	6976283	6980112	12	4	2.3123	0.010379	TPI1
ENSG00000180785	11	4664650	4676718	70	14	2.3083	0.01049	OR51E1
ENSG00000124593	6	41748087	41757879	35	10	2.3047	0.010592	PRICKLE4
ENSG00000109323	4	103552660	103682151	447	26	2.3022	0.010662	MANBA
ENSG00000170370	10	119301955	119309056	13	4	2.2984	0.01077	EMX2
ENSG00000108094	10	35297479	35379570	249	12	2.2968	0.010816	CUL2
ENSG00000171450	2	219824377	219826876	6	1	2.2938	0.010901	CDK5R2
ENSG00000138760	4	77079890	77135046	327	24	2.2904	0.010999	SCARB2
ENSG00000105676	19	19144384	19170563	80	10	2.2903	0.011003	ARMC6
ENSG00000164825	8	6728097	6735544	89	7	2.2893	0.011031	DEFB1
ENSG00000112218	6	97242002	97285353	137	17	2.2891	0.011036	GPR63
ENSG00000235931	10	61715188	61720671	19	3	2.2877	0.011078	C10orf40
ENSG00000105486	19	48618702	48673860	250	15	2.2862	0.011122	LIG1
ENSG00000174437	12	110718561	110788898	90	18	2.2861	0.011125	ATP2A2
ENSG00000239704	17	15339332	15406922	280	27	2.2853	0.011147	CDRT4
ENSG00000142002	19	4675236	4724685	147	33	2.2849	0.011158	DPP9
ENSG00000127083	9	95176527	95186743	21	6	2.2824	0.011232	OMD
ENSG00000170166	2	177015950	177017954	4	2	2.2803	0.011294	HOXD4
ENSG00000066557	1	70610488	70671303	90	11	2.2787	0.011343	LRRC40
ENSG00000113161	5	74632154	74657929	53	11	2.2781	0.011361	HMGCR
ENSG00000166145	15	41136216	41150405	56	10	2.2753	0.011444	SPINT1
ENSG00000053900	4	25378835	25420120	177	12	2.2739	0.011485	ANAPC4
ENSG00000174485	15	65950384	66084631	338	15	2.273	0.011513	DENND4A
ENSG00000010361	19	50310126	50320633	22	6	2.2729	0.011515	FUZ
ENSG00000094916	12	54624724	54673886	51	10	2.2713	0.011563	CBX5
ENSG00000196735	6	32595956	32614839	551	18	2.2691	0.01163	HLA-DQA1
ENSG00000087088	19	49458072	49465055	23	6	2.268	0.011665	BAX
ENSG00000267001	19	2717767	2740046	95	17	2.2664	0.011714	AC006538.4
ENSG00000259112	11	77728017	77790911	311	23	2.2661	0.011723	NDUFC2-KCTD14
ENSG00000179066	19	35596873	35598141	6	2	2.2625	0.011833	AC020907.1
ENSG00000122852	10	81370695	81375196	34	8	2.2615	0.011865	SFTPA1
ENSG00000066583	5	128430444	128449721	79	15	2.2597	0.011921	ISOC1
ENSG00000133661	10	81697496	81742370	285	13	2.2597	0.011921	SFTPD
ENSG00000187535	16	1560428	1662111	370	18	2.2558	0.012042	IFT140
ENSG00000019582	5	149781200	149792492	26	8	2.2503	0.012214	CD74
ENSG00000123066	12	116395711	116715143	552	25	2.2478	0.012293	MED13L
ENSG00000136147	13	50069746	50103123	129	18	2.246	0.012351	PHF11
ENSG00000196305	9	94972489	95056038	230	15	2.2459	0.012354	IARS
ENSG00000156689	11	58601542	58671688	318	9	2.2449	0.012387	GLYATL2
ENSG00000223501	6	33218049	33239824	72	11	2.2448	0.012392	VPS52
ENSG00000227057	6	33246885	33257304	45	12	2.2422	0.012475	WDR46
ENSG00000120051	10	106113522	106214848	209	24	2.2422	0.012475	CCDC147
ENSG00000173679	9	125423845	125424927	4	2	2.2414	0.012501	OR1L1
ENSG00000106524	7	16639401	16685442	200	20	2.2372	0.012638	ANKMY2
ENSG00000131871	15	101811022	101817705	19	8	2.2371	0.01264	VIMP
ENSG00000272921	12	4714110	4771809	262	20	2.2358	0.012681	RP11-500M8.7
ENSG00000100591	14	77924213	77935817	73	11	2.2342	0.012734	AHSA1
ENSG00000269360	15	93749295	93751277	8	4	2.232	0.012806	AC112693.2
ENSG00000157087	3	10365707	10749716	1657	119	2.2293	0.012898	ATP2B2
ENSG00000128159	22	50656118	50683421	120	18	2.2286	0.012919	TUBGCP6
ENSG00000269676	12	133049334	133050726	1	1	2.2268	0.01298	MUC8
ENSG00000064042	4	41361624	41702061	1102	63	2.2265	0.012992	LIMCH1
ENSG00000067365	16	8715540	8740081	76	15	2.2223	0.01313	METTL22
ENSG00000123545	6	97337189	97345757	32	8	2.2216	0.013156	NDUFAF4
ENSG00000121807	3	46395225	46402419	23	6	2.2203	0.0132	CCR2
ENSG00000267893	17	70036164	70036872	4	2	2.2198	0.013216	AC007461.1
ENSG00000270757	2	198365137	198415450	77	12	2.2189	0.013248	HSPE1-MOB4
ENSG00000157214	7	89796904	89867451	278	17	2.2172	0.013304	STEAP2
ENSG00000196628	18	52889562	53332018	875	53	2.2166	0.013324	TCF4
ENSG00000154511	1	93307724	93427057	254	13	2.2158	0.013351	FAM69A
ENSG00000136770	10	22045466	22292698	413	19	2.2146	0.013393	DNAJC1
ENSG00000177311	3	141043055	141168634	354	31	2.2139	0.013418	ZBTB38
ENSG00000173020	11	67033881	67054027	34	8	2.2136	0.01343	ADRBK1
ENSG00000124641	6	41873092	41888877	26	10	2.213	0.013449	MED20
ENSG00000185246	14	45553302	45585485	59	7	2.213	0.013449	PRPF39
ENSG00000099917	22	20850200	20941919	354	21	2.2125	0.013466	MED15
ENSG00000150527	14	39734488	39856156	473	25	2.2116	0.013497	CTAGE5
ENSG00000175550	11	65686728	65689032	5	3	2.2115	0.013502	DRAP1
ENSG00000198000	9	95059640	95087918	78	11	2.2089	0.013592	NOL8
ENSG00000163833	3	121311966	121349139	132	21	2.2074	0.013642	FBXO40
ENSG00000203857	1	120049821	120057681	33	5	2.2011	0.013865	HSD3B1
ENSG00000187123	2	150186499	150330662	363	29	2.1999	0.013907	LYPD6
ENSG00000089876	10	127524906	127585005	79	14	2.1987	0.01395	DHX32
ENSG00000180398	2	47129009	47168994	186	16	2.1935	0.014137	MCFD2
ENSG00000122970	12	110562140	110656602	118	21	2.1924	0.014176	IFT81
ENSG00000108219	10	82213922	82292879	267	31	2.192	0.014188	TSPAN14
ENSG00000110172	11	89934328	89956532	87	10	2.1893	0.014289	CHORDC1
ENSG00000130487	22	50986462	50989451	11	5	2.189	0.014298	KLHDC7B
ENSG00000117399	1	43824626	43828874	7	4	2.1888	0.014307	CDC20
ENSG00000100077	22	25960816	26125261	399	22	2.1878	0.014342	ADRBK2
ENSG00000222047	10	75669727	75682535	30	7	2.1849	0.014447	C10orf55
ENSG00000064607	19	19101697	19144832	138	13	2.1831	0.014516	SUGP2
ENSG00000186919	17	74068042	74079747	17	5	2.1772	0.014733	ZACN
ENSG00000235034	19	51152702	51162567	31	9	2.177	0.01474	C19orf81
ENSG00000189366	3	125648118	125655882	55	8	2.1765	0.014759	ALG1L
ENSG00000179271	19	13064972	13068050	4	2	2.1679	0.015082	GADD45GIP1
ENSG00000170027	7	75956116	75988348	122	19	2.1647	0.015206	YWHAG
ENSG00000180539	9	139921916	139931234	23	4	2.1627	0.015282	C9orf139
ENSG00000135052	9	88641061	88715088	323	28	2.1618	0.015318	GOLM1
ENSG00000095794	10	35415719	35501886	249	11	2.1606	0.015363	CREM
ENSG00000081307	3	132373290	132396941	46	14	2.1571	0.0155	UBA5
ENSG00000132768	1	44435672	44439041	7	3	2.1567	0.015515	DPH2
ENSG00000234719	16	12021230	12070500	189	15	2.1562	0.015535	RP11-166B2.1
ENSG00000162896	1	207101863	207119811	42	7	2.156	0.015541	PIGR
ENSG00000187630	14	24439148	24475617	163	20	2.1554	0.015566	DHRS4L2
ENSG00000076356	1	208195587	208417665	744	45	2.1552	0.015571	PLXNA2
ENSG00000185372	5	180551357	180552304	2	1	2.1548	0.015587	OR2V1
ENSG00000171574	19	58912871	58929694	102	12	2.1546	0.015597	ZNF584
ENSG00000196646	19	12273879	12300064	50	11	2.1545	0.015601	ZNF136
ENSG00000196510	12	110810705	110841535	69	9	2.1538	0.015629	ANAPC7
ENSG00000152207	13	49280951	49283498	6	4	2.153	0.015661	CYSLTR2
ENSG00000126934	19	4090319	4124126	107	22	2.1524	0.015681	MAP2K2
ENSG00000187048	1	47394849	47407156	37	6	2.1485	0.015838	CYP4A11
ENSG00000198901	15	91509270	91538859	131	18	2.1464	0.01592	PRC1
ENSG00000107949	10	127512115	127542264	42	7	2.1445	0.015995	BCCIP
ENSG00000129038	15	74218330	74244478	120	17	2.142	0.016098	LOXL1
ENSG00000214194	7	112756773	112758668	8	3	2.1397	0.016189	LINC00998
ENSG00000134326	2	6980701	7006766	25	11	2.1384	0.016242	CMPK2
ENSG00000196074	20	58438618	58508710	202	10	2.1366	0.016317	SYCP2
ENSG00000048462	16	12058964	12061925	14	4	2.1362	0.01633	TNFRSF17
ENSG00000138375	2	217277137	217347776	275	22	2.1332	0.016453	SMARCAL1
ENSG00000162747	1	161592986	161601753	36	7	2.1328	0.016471	FCGR3B
ENSG00000213699	2	26987152	27004099	44	9	2.1322	0.016497	SLC35F6
ENSG00000171385	1	112313284	112531777	736	68	2.1319	0.016508	KCND3
ENSG00000144935	3	142442916	142526730	239	18	2.1309	0.01655	TRPC1
ENSG00000130517	19	18451397	18480760	124	25	2.1307	0.016556	PGPEP1
ENSG00000267059	19	1578338	1605444	36	8	2.1306	0.016562	UQCR11
ENSG00000168159	1	228674762	228683467	27	9	2.1289	0.01663	RNF187
ENSG00000111254	12	4724674	4758213	174	15	2.1283	0.016655	AKAP3
ENSG00000176619	19	2427636	2456994	163	23	2.128	0.016669	LMNB2
ENSG00000172380	1	68167149	68299150	346	31	2.1275	0.01669	GNG12
ENSG00000011260	17	49337889	49375297	118	17	2.1268	0.016718	UTP18
ENSG00000164508	6	25726291	25726790	7	3	2.1259	0.016758	HIST1H2AA
ENSG00000102891	16	56598961	56602869	17	7	2.1258	0.016759	MT4
ENSG00000213132	3	187896331	187898598	12	3	2.1246	0.016811	AC022498.1
ENSG00000106819	9	95218487	95244788	54	8	2.1244	0.016819	ASPN
ENSG00000270299	20	627270	656444	105	32	2.1243	0.016821	RP5-850E9.3
ENSG00000083814	19	58231119	58238992	21	7	2.1237	0.016849	ZNF671
ENSG00000100583	14	77843032	77857840	51	8	2.1235	0.016858	SAMD15
ENSG00000170417	2	103353367	103460352	237	15	2.1227	0.016887	TMEM182
ENSG00000137270	6	52991762	53013627	76	17	2.1226	0.016893	GCM1
ENSG00000171148	3	9821544	9834695	37	8	2.1223	0.016908	TADA3
ENSG00000145041	3	51433298	51534010	161	16	2.1221	0.016913	VPRBP
ENSG00000107518	10	116853124	117708503	2457	39	2.1191	0.017041	ATRNL1
ENSG00000132671	20	23016057	23017314	5	2	2.1188	0.017052	SSTR4
ENSG00000147853	9	4711155	4742043	241	21	2.1183	0.017074	AK3
ENSG00000141449	18	18822203	19105378	332	19	2.114	0.01726	GREB1L
ENSG00000164080	3	51575160	51702683	157	23	2.1123	0.01733	RAD54L2
ENSG00000106823	9	95256365	95298937	116	15	2.1099	0.017435	ECM2
ENSG00000269035	19	17547420	17571613	83	15	2.1072	0.017549	CTD-2521M24.10
ENSG00000010539	16	3272325	3286221	39	8	2.1068	0.017568	ZNF200
ENSG00000137434	6	10671651	10695030	61	10	2.1056	0.017621	C6orf52
ENSG00000268275	6	41653964	41654127	1	1	2.1049	0.01765	AL035588.1
ENSG00000212673	1	32379174	32380745	3	2	2.1033	0.017721	AL136115.1
ENSG00000272658	14	24778161	24781252	5	2	2.1023	0.017763	LTB4R2
ENSG00000081154	3	101292939	101313281	59	11	2.1014	0.017803	PCNP
ENSG00000162944	2	198432948	198540769	213	15	2.0999	0.017867	RFTN2
ENSG00000185404	2	231191899	231268447	387	24	2.0996	0.017882	SP140L
ENSG00000123612	2	158383279	158485517	132	20	2.0983	0.017941	ACVR1C
ENSG00000126067	1	36067185	36107445	66	10	2.0978	0.017962	PSMB2
ENSG00000196772	1	247978102	247979031	6	3	2.0976	0.01797	OR14A16
ENSG00000108819	17	48211104	48227991	30	11	2.0953	0.018073	PPP1R9B
ENSG00000178821	1	1849029	1850712	7	3	2.0935	0.018151	TMEM52
ENSG00000165355	14	39866873	39901704	142	21	2.0927	0.018187	FBXO33
ENSG00000033327	11	77926343	78129394	666	17	2.0925	0.018195	GAB2
ENSG00000173120	11	66886740	67025558	231	21	2.0924	0.018202	KDM2A
ENSG00000221888	1	247920676	247921982	5	2	2.0913	0.018249	OR1C1
ENSG00000171303	2	26915619	26956288	104	16	2.0912	0.018257	KCNK3
ENSG00000134460	10	6052652	6104288	246	31	2.0889	0.018357	IL2RA
ENSG00000161920	17	4634723	4636905	6	3	2.0882	0.018392	MED11
ENSG00000251537	17	15474805	15554967	262	27	2.0879	0.018402	RP11-385D13.1
ENSG00000113971	3	132276986	132441303	387	29	2.0877	0.018411	NPHP3
ENSG00000188690	10	127477146	127511817	73	4	2.0877	0.018414	UROS
ENSG00000129270	17	34083268	34122711	100	14	2.0875	0.018421	MMP28
ENSG00000143162	1	167498914	167523004	139	23	2.0858	0.018499	CREG1
ENSG00000240303	3	132276982	132379567	239	24	2.0852	0.018526	ACAD11
ENSG00000184014	11	9160372	9286937	363	23	2.085	0.018533	DENND5A
ENSG00000157500	3	57261765	57307496	101	13	2.0846	0.018551	APPL1
ENSG00000111237	12	110928902	110939922	11	4	2.0843	0.018567	VPS29
ENSG00000175619	11	48238344	48239314	3	2	2.083	0.018625	OR4B1
ENSG00000089199	20	5892076	5906007	60	12	2.0821	0.018664	CHGB
ENSG00000154415	7	113516832	113715975	415	17	2.0817	0.018685	PPP1R3A
ENSG00000162998	2	183698002	183731890	134	20	2.0799	0.018769	FRZB
ENSG00000158816	1	20617412	20681387	261	28	2.0795	0.018786	VWA5B1
ENSG00000162913	1	228391207	228401365	37	8	2.0791	0.018803	C1orf145
ENSG00000108602	17	19641297	19652256	29	7	2.0773	0.018887	ALDH3A1
ENSG00000239388	3	57302375	57326710	55	11	2.0772	0.018891	ASB14
ENSG00000004838	3	50378541	50384283	7	3	2.0769	0.018903	ZMYND10
ENSG00000248098	19	41884215	41930910	177	10	2.0758	0.018955	BCKDHA
ENSG00000140623	16	4827670	4838522	67	11	2.074	0.019039	2012-09-01
ENSG00000172339	1	95439963	95538501	270	22	2.0736	0.019057	ALG14
ENSG00000109189	4	53457138	53525502	91	8	2.0714	0.01916	USP46
ENSG00000146122	6	39760142	39872648	432	44	2.0708	0.019187	DAAM2
ENSG00000106541	7	16831435	16873057	256	22	2.0706	0.019197	AGR2
ENSG00000117616	1	25568728	25664704	52	12	2.0684	0.019303	C1orf63
ENSG00000150526	14	39699435	39722859	71	13	2.0683	0.019306	MIA2
ENSG00000151445	14	77893018	77924295	107	15	2.0644	0.019492	VIPAS39
ENSG00000085377	6	105725440	105850959	485	38	2.0642	0.019497	PREP
ENSG00000122986	12	111065646	111142755	121	13	2.064	0.019508	HVCN1
ENSG00000160803	1	156005092	156023585	24	8	2.0621	0.019601	UBQLN4
ENSG00000163531	1	204797779	204991950	727	53	2.0606	0.01967	NFASC
ENSG00000100385	22	37521878	37571094	202	38	2.0606	0.01967	IL2RB
ENSG00000197261	6	49518113	49529620	48	7	2.0603	0.019687	C6orf141
ENSG00000166823	15	90291892	90294541	12	5	2.0601	0.019692	MESP1
ENSG00000185069	12	53161939	53171129	41	10	2.0599	0.019703	KRT76
ENSG00000186827	1	1146706	1149518	12	5	2.0573	0.019831	TNFRSF4
ENSG00000197576	7	27168126	27170418	8	2	2.0547	0.019955	HOXA4
ENSG00000175643	16	11343476	11445619	499	21	2.0528	0.020048	RMI2
ENSG00000136160	13	78469616	78493903	48	9	2.0513	0.020118	EDNRB
ENSG00000116212	1	54411750	54433841	28	7	2.0506	0.020152	LRRC42
ENSG00000134061	5	66478103	66492627	50	10	2.0505	0.020156	CD180
ENSG00000178150	19	48675575	48790865	675	49	2.0505	0.020156	ZNF114
ENSG00000254656	14	101346992	101351184	11	5	2.0499	0.020189	RTL1
ENSG00000164663	6	41757634	41863099	233	20	2.049	0.020233	USP49
ENSG00000205863	13	24465238	24476794	49	6	2.0483	0.020264	C1QTNF9B
ENSG00000108342	17	38171614	38174066	14	4	2.0472	0.020318	CSF3
ENSG00000141458	18	21086148	21166862	185	16	2.0472	0.020321	NPC1
ENSG00000228835	18	30349758	30354376	8	3	2.0439	0.020483	AC012123.1
ENSG00000145332	4	88081255	88161466	192	19	2.0435	0.020502	KLHL8
ENSG00000178917	3	44540462	44552128	11	5	2.043	0.020524	ZNF852
ENSG00000001167	6	41040684	41067715	58	11	2.0429	0.020531	NFYA
ENSG00000214706	3	50325163	50330349	8	5	2.0421	0.020572	IFRD2
ENSG00000189129	10	81891438	81905115	87	17	2.0419	0.020578	PLAC9
ENSG00000160999	7	101928405	101962178	93	23	2.0419	0.02058	SH2B2
ENSG00000122483	1	93645476	93744287	280	15	2.0417	0.020593	CCDC18
ENSG00000133059	1	205111632	205180727	178	12	2.0415	0.020599	DSTYK
ENSG00000182083	2	240968841	240969906	2	1	2.0405	0.020651	OR6B2
ENSG00000162399	1	55464606	55476556	49	12	2.0387	0.020742	BSND
ENSG00000256591	11	61196692	61253294	130	14	2.0384	0.020756	RP11-286N22.8
ENSG00000071655	19	1576639	1592882	29	7	2.0381	0.020772	MBD3
ENSG00000138297	10	51592080	51623365	1	1	2.0367	0.02084	TIMM23
ENSG00000089902	14	103058998	103196913	453	21	2.0364	0.020856	RCOR1
ENSG00000185972	9	36169389	36171329	6	3	2.0333	0.021013	CCIN
ENSG00000131203	8	39759794	39785963	50	8	2.0323	0.021063	IDO1
ENSG00000213139	3	186256230	186264491	19	6	2.0318	0.021088	CRYGS
ENSG00000110066	11	67922330	67981295	121	14	2.0311	0.021124	SUV420H1
ENSG00000109917	11	116648436	116658766	30	9	2.0303	0.021163	ZNF259
ENSG00000102753	13	50273447	50367057	313	25	2.0292	0.021217	KPNA3
ENSG00000163527	3	31574130	31679112	277	23	2.0292	0.021221	STT3B
ENSG00000213949	5	52083730	52255040	660	63	2.0277	0.021296	ITGA1
ENSG00000205189	8	81397854	81438500	96	14	2.0262	0.021371	ZBTB10
ENSG00000021645	14	78708734	80330762	5046	160	2.0262	0.021371	NRXN3
ENSG00000134201	1	110254864	110318050	212	29	2.0235	0.021509	GSTM5
ENSG00000151151	10	59951278	60027694	340	11	2.0234	0.021514	IPMK
ENSG00000180353	3	121350246	121379774	85	11	2.0226	0.021557	HCLS1
ENSG00000117500	1	93615299	93646285	75	11	2.0221	0.021582	TMED5
ENSG00000129910	16	89238175	89261900	87	14	2.0219	0.021596	CDH15
ENSG00000167881	17	74035184	74068734	75	8	2.0178	0.021804	SRP68
ENSG00000198952	1	156219015	156252620	86	9	2.017	0.021847	SMG5
ENSG00000126246	19	36230058	36233354	12	4	2.017	0.02185	IGFLR1
ENSG00000167768	12	53068520	53074191	20	6	2.0157	0.021916	KRT1
ENSG00000178951	19	4044362	4066943	51	10	2.014	0.022004	ZBTB7A
ENSG00000157017	3	10327359	10334631	26	9	2.0132	0.022048	GHRL
ENSG00000145216	4	54243810	55161439	3018	101	2.0125	0.022086	FIP1L1
ENSG00000255221	11	104963196	104972158	34	9	2.009	0.022268	CARD17
ENSG00000099817	19	1086594	1095598	51	16	2.007	0.022374	POLR2E
ENSG00000172538	10	50339199	50342053	19	5	2.0059	0.022431	FAM170B
ENSG00000067066	2	231280657	231408805	447	35	2.0053	0.022467	SP100
ENSG00000268519	12	77949297	77950568	5	1	2.0049	0.022485	AC073528.1
ENSG00000169676	4	9783258	9785632	5	2	2.0042	0.022522	DRD5
ENSG00000077522	1	236849754	236927931	341	35	2.0041	0.022531	ACTN2
ENSG00000167595	19	36249044	36261930	42	13	2.0039	0.022541	C19orf55
ENSG00000162290	3	53317447	53381654	150	21	2.0038	0.022548	DCP1A
ENSG00000161911	6	41117080	41122075	10	4	2.003	0.022588	TREML1
ENSG00000087128	4	69313167	69363322	246	17	2.0029	0.022593	TMPRSS11E
ENSG00000164081	3	51696709	51738339	48	11	2.0029	0.022595	TEX264
ENSG00000130304	19	17579578	17616977	148	19	2.0027	0.022603	SLC27A1
ENSG00000244623	7	99473610	99474680	8	3	2.002	0.022643	OR2AE1
ENSG00000182759	8	144501352	144512576	67	15	2.0019	0.022647	MAFA
ENSG00000122873	10	60028818	60049346	73	8	2.0017	0.02266	CISD1
ENSG00000078403	10	21823094	22032559	276	23	2.0007	0.022714	MLLT10
ENSG00000167985	11	61197514	61215001	40	8	1.9996	0.022772	SDHAF2
ENSG00000160255	21	46305868	46351904	263	50	1.9966	0.022934	ITGB2
ENSG00000104969	19	2754712	2783369	94	11	1.9966	0.022935	SGTA
ENSG00000243725	1	55181495	55208330	179	5	1.9961	0.022962	TTC4
ENSG00000149452	11	62756626	62783311	52	17	1.9961	0.022964	SLC22A8
ENSG00000111796	12	9747147	9760482	64	15	1.9959	0.022975	KLRB1
ENSG00000267552	19	38180766	38210089	87	14	1.9954	0.023001	CTD-2528L19.4
ENSG00000172239	5	43526369	43557860	72	9	1.9951	0.023016	PAIP1
ENSG00000176490	19	2714565	2721416	30	6	1.9943	0.023059	DIRAS1
ENSG00000255730	19	41856758	41930906	247	15	1.9938	0.023088	CTC-435M10.3
ENSG00000146143	6	57179603	57513375	481	35	1.993	0.023133	PRIM2
ENSG00000182584	20	32254304	32256331	4	1	1.9929	0.023138	ACTL10
ENSG00000117139	1	202696526	202778598	228	16	1.9904	0.023271	KDM5B
ENSG00000204397	11	104912053	104972158	247	18	1.9904	0.023273	CARD16
ENSG00000215397	20	642240	656823	49	15	1.9903	0.023278	SCRT2
ENSG00000096006	6	49695097	49712150	44	9	1.99	0.023294	CRISP3
ENSG00000028528	15	64386322	64438289	132	17	1.9897	0.023311	SNX1
ENSG00000182263	2	164449906	164592522	311	40	1.9893	0.023332	FIGN
ENSG00000023909	1	94350761	94374966	76	11	1.9889	0.023354	GCLM
ENSG00000185198	19	685521	695460	105	19	1.9876	0.023426	PRSS57
ENSG00000133433	22	24299601	24303373	2	1	1.9875	0.023433	GSTT2B
ENSG00000198788	11	1074875	1104419	143	20	1.9869	0.023465	MUC2
ENSG00000112530	6	163148164	163736524	2189	104	1.9869	0.023468	PACRG
ENSG00000127989	7	91321323	91510034	339	17	1.9849	0.023576	MTERF
ENSG00000106341	7	31726329	31748069	92	20	1.9845	0.023603	PPP1R17
ENSG00000114405	3	62304648	62321888	20	8	1.9841	0.023625	C3orf14
ENSG00000163075	2	120302008	120419827	201	16	1.9819	0.023744	PCDP1
ENSG00000183020	11	924894	1012239	369	15	1.9815	0.02377	AP2A2
ENSG00000196387	12	133656424	133684130	12	3	1.9812	0.023785	ZNF140
ENSG00000204889	17	39133968	39143387	82	6	1.981	0.023797	KRT40
ENSG00000086730	7	73613982	73644161	93	10	1.9801	0.023847	LAT2
ENSG00000008517	16	3115298	3131908	95	18	1.9783	0.023947	IL32
ENSG00000205726	21	35014706	35272165	625	51	1.9781	0.023958	ITSN1
ENSG00000135540	6	138743180	139013708	1096	66	1.9775	0.023991	NHSL1
ENSG00000163827	3	46556913	46621589	264	21	1.9767	0.024038	LRRC2
ENSG00000187189	6	116571151	116575261	10	3	1.9766	0.024046	TSPYL4
ENSG00000197056	1	35525387	35581460	167	22	1.9738	0.024203	ZMYM1
ENSG00000182585	4	75174190	75181024	11	2	1.972	0.024306	EPGN
ENSG00000145623	5	38845960	38945698	307	34	1.9706	0.024385	OSMR
ENSG00000169981	3	44690219	44702283	10	6	1.9699	0.024427	ZNF35
ENSG00000161970	17	8280838	8286531	19	4	1.9699	0.024428	RPL26
ENSG00000105989	7	116916685	116963343	89	20	1.9691	0.024471	WNT2
ENSG00000136628	1	220141943	220220000	357	15	1.969	0.024477	EPRS
ENSG00000135521	6	144164481	144184949	56	12	1.967	0.024593	LTV1
ENSG00000165555	14	77860364	77889860	84	15	1.9664	0.024629	NOXRED1
ENSG00000184787	21	46188955	46221934	126	18	1.9653	0.02469	UBE2G2
ENSG00000135999	2	149402009	149545130	359	12	1.9649	0.024713	EPC2
ENSG00000100441	14	24898492	24910540	77	12	1.9642	0.024756	KHNYN
ENSG00000164647	7	89783689	89794143	26	8	1.9636	0.02479	STEAP1
ENSG00000269267	5	60411538	60411762	2	1	1.9634	0.024802	AC008498.1
ENSG00000172244	5	43486803	43515247	45	6	1.9626	0.024845	C5orf34
ENSG00000215912	1	2567415	2718286	149	18	1.9622	0.024867	TTC34
ENSG00000175782	12	69139886	69187508	115	27	1.9622	0.024868	SLC35E3
ENSG00000104957	19	13842574	13874110	119	17	1.9608	0.024948	CCDC130
ENSG00000166794	15	64448011	64455404	18	6	1.9608	0.024949	PPIB
ENSG00000067560	3	49396578	49450431	108	12	1.9599	0.025005	RHOA
ENSG00000187098	3	69788586	70017488	534	21	1.9589	0.025063	MITF
ENSG00000215306	14	23286463	23291750	21	7	1.9587	0.025076	AL135998.1
ENSG00000105341	19	41937223	41946622	32	5	1.9584	0.025094	ATP5SL
ENSG00000114395	3	50388126	50395891	11	4	1.9569	0.025177	CYB561D2
ENSG00000180992	6	44081194	44095194	48	10	1.9553	0.025271	MRPL14
ENSG00000114124	3	141496990	141537332	137	23	1.9545	0.025322	GRK7
ENSG00000173610	4	70454135	70518965	325	22	1.9536	0.025376	UGT2A1
ENSG00000245317	5	179286013	179288283	11	4	1.9505	0.025558	CTC-241N9.1
ENSG00000155890	3	140396881	140419992	76	13	1.9504	0.025566	TRIM42
ENSG00000115524	2	198254508	198299815	64	11	1.9496	0.025611	SF3B1
ENSG00000126091	1	44171495	44396831	627	25	1.9485	0.025678	ST3GAL3
ENSG00000100908	14	24608174	24610797	6	2	1.9472	0.025753	EMC9
ENSG00000117505	1	93811445	93835055	61	11	1.9464	0.025802	DR1
ENSG00000177414	1	64669310	64733051	199	17	1.9464	0.025805	UBE2U
ENSG00000188223	19	36236579	36245420	17	5	1.946	0.025827	AC002398.9
ENSG00000183207	19	49496705	49519252	75	10	1.9458	0.02584	RUVBL2
ENSG00000117614	1	25549170	25558993	20	4	1.9452	0.025876	SYF2
ENSG00000151164	12	110939460	110969891	63	10	1.9448	0.025898	RAD9B
ENSG00000008294	17	49039535	49198226	314	24	1.9439	0.025952	SPAG9
ENSG00000101605	18	3066805	3220106	722	68	1.9439	0.025952	MYOM1
ENSG00000142698	1	34632484	34684732	206	22	1.9436	0.02597	C1orf94
ENSG00000249915	5	271736	353971	314	21	1.9436	0.025974	PDCD6
ENSG00000171051	19	52248425	52307363	289	38	1.9424	0.026043	FPR1
ENSG00000186925	21	31913854	31914183	3	1	1.9423	0.026051	KRTAP19-6
ENSG00000106006	7	27185015	27190222	16	4	1.9418	0.026083	HOXA6
ENSG00000104765	8	26240414	26363152	567	60	1.9409	0.026134	BNIP3L
ENSG00000136381	15	78729773	78793798	173	19	1.9408	0.026144	IREB2
ENSG00000122359	10	81910645	81965328	230	18	1.9406	0.026153	ANXA11
ENSG00000246922	15	65385338	65407535	21	7	1.9396	0.026214	UBAP1L
ENSG00000111229	12	110872630	110888227	36	8	1.9392	0.02624	ARPC3
ENSG00000065371	3	123687368	123711025	73	13	1.9386	0.026274	ROPN1
ENSG00000113522	5	131891711	131980313	265	18	1.9386	0.026277	RAD50
ENSG00000184254	15	101417919	101456831	108	18	1.9386	0.026278	ALDH1A3
ENSG00000268146	1	244227632	244231211	7	3	1.9384	0.026288	AL590483.1
ENSG00000128284	22	36536372	36562225	132	23	1.9379	0.026318	APOL3
ENSG00000186106	8	101521980	101572012	142	21	1.9375	0.026342	ANKRD46
ENSG00000180543	8	98285717	98290176	10	4	1.9371	0.026369	TSPYL5
ENSG00000121774	1	32479430	32526451	93	7	1.937	0.026375	KHDRBS1
ENSG00000128609	7	123177051	123198309	51	9	1.9368	0.026386	NDUFA5
ENSG00000139329	12	91496406	91505608	49	8	1.9365	0.026406	LUM
ENSG00000080293	2	120197419	120282070	394	34	1.9357	0.026453	SCTR
ENSG00000169194	5	131991955	131996802	14	5	1.9356	0.026457	IL13
ENSG00000072832	4	5749811	5894785	689	74	1.9339	0.026561	CRMP1
ENSG00000163817	3	45796942	45838027	114	37	1.9338	0.026568	SLC6A20
ENSG00000172061	3	194075976	194090472	123	12	1.9306	0.026765	LRRC15
ENSG00000104946	19	50380682	50392005	28	7	1.9305	0.026774	TBC1D17
ENSG00000080823	14	102690837	102771537	263	18	1.9302	0.026789	MOK
ENSG00000105393	19	17378159	17392058	52	10	1.9295	0.026836	BABAM1
ENSG00000058804	1	54231133	54304533	149	14	1.9291	0.026857	NDC1
ENSG00000196859	17	39114669	39123144	32	7	1.9291	0.02686	KRT39
ENSG00000197177	10	134884433	134945179	273	35	1.9285	0.026896	GPR123
ENSG00000140527	15	90234028	90286869	213	10	1.9284	0.026902	WDR93
ENSG00000144381	2	198351305	198381461	59	12	1.9275	0.026957	HSPD1
ENSG00000270386	4	70454912	70518967	323	22	1.9264	0.027026	UGT2A1
ENSG00000267880	19	51377552	51378040	2	1	1.9259	0.02706	AC037199.1
ENSG00000251493	5	72740654	72744352	9	4	1.9243	0.02716	FOXD1
ENSG00000149532	11	61170121	61197503	42	10	1.9239	0.027186	CPSF7
ENSG00000166803	15	64657193	64679886	48	10	1.9214	0.027343	KIAA0101
ENSG00000271271	4	70454135	70505360	267	18	1.9209	0.02737	UGT2A2
ENSG00000105483	19	48684027	48759203	412	31	1.9204	0.027406	CARD8
ENSG00000100442	14	45584803	45604522	28	7	1.9203	0.02741	FKBP3
ENSG00000163006	2	109403213	109501933	282	22	1.9192	0.027478	CCDC138
ENSG00000106263	7	2393721	2420380	86	11	1.9178	0.027571	EIF3B
ENSG00000184349	5	106712590	107006596	946	89	1.9175	0.027584	EFNA5
ENSG00000161849	12	52771596	52779436	65	5	1.9167	0.027636	KRT84
ENSG00000142409	19	56598732	56632649	126	12	1.9154	0.027719	ZNF787
ENSG00000180667	1	207217194	207226325	22	7	1.9137	0.027827	YOD1
ENSG00000171611	6	42883727	42893573	31	6	1.9133	0.027858	PTCRA
ENSG00000171773	19	17566234	17571763	30	7	1.913	0.027874	NXNL1
ENSG00000144306	2	175260458	175294303	120	9	1.9109	0.028008	SCRN3
ENSG00000180592	10	21802407	21814611	13	4	1.9104	0.028039	SKIDA1
ENSG00000003436	2	188328957	188430487	315	36	1.9103	0.028047	TFPI
ENSG00000243646	21	34638663	34669539	116	13	1.9079	0.028202	IL10RB
ENSG00000137210	6	10747992	10852986	294	36	1.9074	0.028236	TMEM14B
ENSG00000185518	15	91643180	91844539	798	54	1.9068	0.028275	SV2B
ENSG00000054179	9	139942550	139948497	18	7	1.9048	0.028406	ENTPD2
ENSG00000123444	11	47593749	47600567	5	3	1.9047	0.028411	KBTBD4
ENSG00000165813	10	115880621	115933979	117	13	1.9046	0.028417	C10orf118
ENSG00000166965	15	91498100	91506349	45	11	1.904	0.028453	RCCD1
ENSG00000180869	1	85093913	85100703	20	7	1.9039	0.028463	C1orf180
ENSG00000089169	12	113008184	113336686	776	63	1.903	0.028519	RPH3A
ENSG00000188130	22	50683879	50700254	73	11	1.9027	0.028537	MAPK12
ENSG00000132849	1	62208149	62629592	1689	87	1.902	0.028588	INADL
ENSG00000204542	6	31079000	31080336	18	5	1.902	0.028588	C6orf15
ENSG00000169964	3	44903361	44907162	2	1	1.9009	0.028661	TMEM42
ENSG00000120693	13	37418968	37494902	274	37	1.9009	0.028661	SMAD9
ENSG00000137218	6	41737914	41754280	52	15	1.8998	0.028733	FRS3
ENSG00000167992	11	61025762	61062896	51	9	1.8992	0.028766	VWCE
ENSG00000157837	12	121200313	121342174	481	20	1.8977	0.028868	SPPL3
ENSG00000150760	10	128593978	129250781	2228	128	1.897	0.028916	DOCK1
ENSG00000198108	5	129240165	129522327	733	28	1.8951	0.029037	CHSY3
ENSG00000054967	11	73087309	73108519	57	12	1.8919	0.029253	RELT
ENSG00000228474	2	27293340	27294641	1	1	1.8895	0.02941	OST4
ENSG00000070761	16	58147496	58163354	44	6	1.8893	0.029424	C16orf80
ENSG00000163328	2	175296966	175351822	141	19	1.8876	0.02954	GPR155
ENSG00000174943	16	29916333	29938356	52	11	1.8874	0.02955	KCTD13
ENSG00000204681	6	29523406	29601753	351	31	1.8856	0.029671	GABBR1
ENSG00000169885	1	1846266	1848735	11	3	1.8855	0.029683	CALML6
ENSG00000085998	1	46654354	46685977	50	10	1.8848	0.029727	POMGNT1
ENSG00000205155	19	36236015	36237911	3	2	1.8847	0.029737	PSENEN
ENSG00000268800	5	162866447	162873821	12	5	1.8834	0.029822	AC112205.1
ENSG00000091844	6	153325594	153452384	493	26	1.8834	0.029824	RGS17
ENSG00000184956	11	1012821	1036706	72	18	1.8824	0.029889	MUC6
ENSG00000153107	2	112523848	112642267	368	20	1.8817	0.029937	ANAPC1
ENSG00000162105	11	70313961	70963623	2181	133	1.8811	0.029979	SHANK2
ENSG00000170929	19	9203855	9204889	2	1	1.8803	0.030036	OR1M1
ENSG00000186446	3	44771088	44778575	13	3	1.8798	0.030066	ZNF501
ENSG00000161981	16	103010	107669	14	4	1.8792	0.03011	SNRNP25
ENSG00000182973	3	32726637	32815367	370	16	1.8786	0.030152	CNOT10
ENSG00000184601	14	105046021	105056852	35	7	1.8781	0.030181	C14orf180
ENSG00000083896	4	69176105	69215807	83	15	1.8761	0.030319	YTHDC1
ENSG00000127914	7	91570181	91739987	381	9	1.8748	0.03041	AKAP9
ENSG00000251692	16	1535887	1538982	31	8	1.8745	0.030428	PTX4
ENSG00000143001	1	55446465	55457966	62	9	1.8731	0.030525	TMEM61
ENSG00000116586	1	156024543	156028301	4	2	1.8725	0.030569	LAMTOR2
ENSG00000164129	4	164265091	164273086	27	5	1.8695	0.030775	NPY5R
ENSG00000065534	3	123328896	123603178	816	63	1.869	0.03081	MYLK
ENSG00000092421	5	115779312	115910630	524	64	1.8686	0.030838	SEMA6A
ENSG00000156958	15	49447853	49660066	688	19	1.8685	0.030846	GALK2
ENSG00000198464	19	52800430	52829175	103	20	1.8672	0.03094	ZNF480
ENSG00000140153	14	102605840	102691184	231	26	1.8667	0.030969	WDR20
ENSG00000235268	11	94758422	94760760	5	2	1.8657	0.031044	KDM4E
ENSG00000142583	1	9095166	9148537	222	24	1.8656	0.031049	SLC2A5
ENSG00000136939	9	125486269	125487204	1	1	1.8646	0.03112	OR1L4
ENSG00000154262	17	67074843	67138029	136	15	1.8637	0.031182	ABCA6
ENSG00000174939	16	29911696	29931185	32	10	1.8635	0.031195	ASPHD1
ENSG00000138079	2	44502599	44548633	173	24	1.8616	0.031327	SLC3A1
ENSG00000273079	12	13693165	14133053	1634	76	1.8601	0.031432	GRIN2B
ENSG00000155886	9	19507450	19786926	1049	53	1.8601	0.031434	SLC24A2
ENSG00000180336	17	42733762	42767676	40	13	1.8599	0.031447	C17orf104
ENSG00000149658	20	61826781	61847586	55	8	1.8599	0.031447	YTHDF1
ENSG00000103342	16	11961985	12009939	118	15	1.8589	0.031522	GSPT1
ENSG00000196620	4	69512348	69536346	84	19	1.8584	0.031559	UGT2B15
ENSG00000135213	7	75046066	75115548	161	24	1.8562	0.031713	POM121C
ENSG00000159214	1	44457031	44462200	9	4	1.856	0.031729	CCDC24
ENSG00000219607	6	5085720	5087455	7	2	1.856	0.03173	PPP1R3G
ENSG00000144227	2	139428342	139537918	351	38	1.8548	0.031812	NXPH2
ENSG00000173141	13	21750784	21753223	4	2	1.8546	0.031827	MRP63
ENSG00000171490	16	11929056	11945442	44	9	1.8527	0.031959	RSL1D1
ENSG00000111262	12	5019071	5040527	58	11	1.8526	0.031969	KCNA1
ENSG00000126432	11	64085560	64089283	8	4	1.852	0.032012	PRDX5
ENSG00000100650	14	70193617	70238722	137	22	1.8515	0.032047	SRSF5
ENSG00000211445	5	150400124	150408554	41	8	1.8506	0.032114	GPX3
ENSG00000158901	20	44179792	44207965	182	4	1.8499	0.032164	WFDC8
ENSG00000259024	17	15339338	15466875	459	31	1.8491	0.03222	TVP23C-CDRT4
ENSG00000124467	19	43256838	43359843	421	25	1.8491	0.032221	PSG8
ENSG00000137252	6	55039050	55147418	420	29	1.8484	0.032269	HCRTR2
ENSG00000124003	2	223536505	223574649	148	29	1.8482	0.032285	MOGAT1
ENSG00000071189	7	17830385	17980124	407	21	1.8481	0.032291	SNX13
ENSG00000159267	21	38123189	38362536	904	40	1.848	0.032304	HLCS
ENSG00000100448	14	25042728	25045466	9	4	1.847	0.032376	CTSG
ENSG00000147571	8	67088620	67090960	5	3	1.8459	0.032453	CRH
ENSG00000269307	19	17378227	17393775	64	12	1.8447	0.032543	CTD-2278I10.6
ENSG00000171817	19	38042308	38104998	177	17	1.8443	0.032567	ZNF540
ENSG00000261717	16	75446582	75498604	223	9	1.8442	0.032574	RP11-77K12.1
ENSG00000244045	17	26684604	26708716	53	6	1.8429	0.032673	TMEM199
ENSG00000223547	19	12175514	12192380	53	7	1.8428	0.032679	ZNF844
ENSG00000186146	4	9446260	9452240	23	8	1.842	0.032737	DEFB131
ENSG00000105255	19	4304597	4323840	66	16	1.8405	0.032845	FSD1
ENSG00000175143	1	248569296	248570405	3	2	1.8403	0.032859	OR2T1
ENSG00000163902	3	128338817	128399918	190	12	1.84	0.032884	RPN1
ENSG00000049541	7	73645829	73668774	66	11	1.8391	0.032953	RFC2
ENSG00000196850	12	110969120	111021125	64	15	1.8378	0.033045	PPTC7
ENSG00000154263	17	67143355	67240987	287	20	1.8372	0.033092	ABCA10
ENSG00000163481	2	219528587	219537134	23	4	1.8361	0.033174	RNF25
ENSG00000160113	19	17342692	17356749	46	18	1.8351	0.033249	NR2F6
ENSG00000076662	19	10444452	10450499	25	3	1.8342	0.03331	ICAM3
ENSG00000127463	1	19542158	19578046	121	18	1.8335	0.033362	EMC1
ENSG00000161609	19	49891475	49921251	133	15	1.8334	0.033375	CCDC155
ENSG00000048740	10	11047259	11378674	1384	86	1.8317	0.033497	CELF2
ENSG00000198865	5	42756903	42802462	141	14	1.83	0.033622	CCDC152
ENSG00000113525	5	131877136	131892530	33	8	1.8299	0.033632	IL5
ENSG00000151881	5	43444354	43483995	96	7	1.8296	0.033654	C5orf28
ENSG00000113494	5	35048861	35230794	662	40	1.8294	0.033667	PRLR
ENSG00000036565	8	20002366	20040717	211	25	1.8294	0.033667	SLC18A1
ENSG00000132330	2	238969530	239008054	183	17	1.8293	0.033674	SCLY
ENSG00000116809	1	16268364	16302627	72	16	1.8285	0.033734	ZBTB17
ENSG00000141753	17	38599702	38613983	28	8	1.8283	0.033752	IGFBP4
ENSG00000183668	19	43715943	43773682	63	10	1.8283	0.033756	PSG9
ENSG00000164597	7	106842000	107204959	879	19	1.8272	0.033833	COG5
ENSG00000143318	1	160160285	160171676	38	14	1.8247	0.034026	CASQ1
ENSG00000002549	4	17578815	17609595	124	13	1.8246	0.034028	LAP3
ENSG00000179588	16	88519725	88603424	381	42	1.8246	0.034032	ZFPM1
ENSG00000179837	3	51428731	51435330	8	4	1.8243	0.034056	RBM15B
ENSG00000113805	3	74311719	74570291	911	79	1.8237	0.0341	CNTN3
ENSG00000004700	12	21621845	21654603	139	24	1.8236	0.034106	RECQL
ENSG00000253148	1	192286122	192336415	108	12	1.8224	0.034198	RGS21
ENSG00000188771	11	112118876	112131583	41	9	1.8199	0.034388	PLET1
ENSG00000005421	7	94926988	95025673	381	28	1.8198	0.034397	PON1
ENSG00000120802	12	98909290	98944157	103	16	1.8191	0.034447	TMPO
ENSG00000111206	12	2966847	2986206	67	13	1.8188	0.034471	FOXM1
ENSG00000163235	2	70674412	70781325	434	43	1.8184	0.0345	TGFA
ENSG00000124882	4	75230860	75254468	72	7	1.8184	0.034503	EREG
ENSG00000089351	19	35485688	35517375	125	14	1.8175	0.034571	GRAMD1A
ENSG00000183090	4	144498455	144621828	411	22	1.8156	0.034713	FREM3
ENSG00000137225	6	44126548	44152139	106	21	1.8154	0.03473	CAPN11
ENSG00000100726	16	1543345	1560458	69	12	1.8147	0.034787	TELO2
ENSG00000122718	9	35957105	35958151	11	2	1.8143	0.034813	OR2S2
ENSG00000160050	1	32665987	32670988	4	2	1.8143	0.034816	CCDC28B
ENSG00000107643	10	49514698	49647403	369	23	1.8143	0.034817	MAPK8
ENSG00000065609	6	84262599	84419410	447	29	1.8137	0.034863	SNAP91
ENSG00000170561	5	2745959	2752969	14	6	1.813	0.034915	IRX2
ENSG00000096088	6	41704449	41721847	49	17	1.8122	0.034974	PGC
ENSG00000130313	19	17622438	17632097	32	9	1.8118	0.035008	PGLS
ENSG00000099290	10	51827648	51893269	41	9	1.8117	0.035014	FAM21A
ENSG00000196381	19	38158652	38183223	85	18	1.8116	0.03502	ZNF781
ENSG00000145088	3	121554030	121605373	172	13	1.8114	0.035038	EAF2
ENSG00000147454	8	23386318	23432976	279	23	1.8112	0.035051	SLC25A37
ENSG00000038002	4	178351924	178363657	53	14	1.811	0.035071	AGA
ENSG00000187554	1	223282748	223316624	104	10	1.8105	0.035113	TLR5
ENSG00000171049	19	52255279	52273779	95	16	1.81	0.035148	FPR2
ENSG00000198182	19	38187264	38210691	72	13	1.8099	0.035159	ZNF607
ENSG00000158296	20	45186463	45304714	354	51	1.8098	0.035163	SLC13A3
ENSG00000175727	12	122516628	122631894	278	12	1.8094	0.035194	MLXIP
ENSG00000141873	19	2732202	2740150	27	7	1.8089	0.035232	SLC39A3
ENSG00000105880	7	96649704	96654409	10	6	1.8087	0.035247	DLX5
ENSG00000087460	20	57414773	57486247	188	36	1.8085	0.035265	GNAS
ENSG00000170190	17	73083822	73102257	117	22	1.8083	0.035278	SLC16A5
ENSG00000065029	6	35226686	35263762	94	12	1.8082	0.035286	ZNF76
ENSG00000156966	2	232260254	232265875	15	7	1.8079	0.035314	B3GNT7
ENSG00000160208	21	45079429	45115958	100	13	1.8075	0.035345	RRP1B
ENSG00000170185	4	144106070	144144983	102	11	1.8048	0.035553	USP38
ENSG00000122952	10	58116989	58121036	12	4	1.8042	0.0356	ZWINT
ENSG00000185219	3	44481262	44519162	60	11	1.8033	0.035672	ZNF445
ENSG00000148600	10	85954410	85979377	125	19	1.8032	0.035676	CDHR1
ENSG00000082269	6	71122644	71270877	549	17	1.8021	0.035765	FAM135A
ENSG00000103148	16	134273	188859	179	22	1.8013	0.035829	NPRL3
ENSG00000173894	17	77751931	77761782	31	16	1.8011	0.035843	CBX2
ENSG00000166797	15	64364758	64386217	71	10	1.8008	0.03587	FAM96A
ENSG00000067334	1	94333373	94345474	52	8	1.7997	0.035952	DNTTIP2
ENSG00000157379	14	24759804	24769039	27	6	1.7983	0.036068	DHRS1
ENSG00000182544	12	53645035	53648189	7	2	1.798	0.036088	MFSD5
ENSG00000119321	9	115923286	115983641	251	18	1.7978	0.036102	FKBP15
ENSG00000162373	1	49193195	49242641	86	15	1.7973	0.03614	BEND5
ENSG00000085276	3	168801287	169381406	2098	106	1.7973	0.036142	MECOM
ENSG00000177951	11	167784	207428	57	14	1.7959	0.036256	BET1L
ENSG00000162636	1	109102711	109187522	168	9	1.7956	0.036278	FAM102B
ENSG00000135443	12	52753790	52761265	30	9	1.7935	0.036443	KRT85
ENSG00000260234	3	150600784	150659530	237	44	1.7934	0.036455	RP11-166N6.3
ENSG00000111358	12	124118375	124147153	93	13	1.7925	0.036529	GTF2H3
ENSG00000114030	3	122140796	122233792	231	16	1.7922	0.036548	KPNA1
ENSG00000106034	7	120628731	120937498	862	32	1.7918	0.036584	CPED1
ENSG00000179431	11	35639735	35642419	7	4	1.7918	0.036585	FJX1
ENSG00000198756	1	183898796	184006863	434	42	1.7917	0.036587	COLGALT2
ENSG00000196961	19	50270225	50310370	105	15	1.7913	0.036621	AP2A1
ENSG00000127252	3	192958914	192995527	128	15	1.7903	0.036703	HRASLS
ENSG00000175106	17	15341205	15466909	454	29	1.789	0.03681	TVP23C
ENSG00000011258	17	49254786	49337524	224	15	1.7889	0.036812	MBTD1
ENSG00000177106	11	694438	727727	146	32	1.7888	0.036826	EPS8L2
ENSG00000197134	19	22235254	22274282	237	14	1.7883	0.036862	ZNF257
ENSG00000099956	22	24129150	24176703	348	19	1.7871	0.03696	SMARCB1
ENSG00000176349	7	1878222	1889567	79	11	1.787	0.03697	AC110781.3
ENSG00000108947	17	7608520	7614696	7	2	1.7867	0.036995	EFNB3
ENSG00000164045	3	48198636	48229892	44	9	1.7852	0.037118	CDC25A
ENSG00000159055	21	33640530	33651380	16	5	1.785	0.037129	MIS18A
ENSG00000124701	6	41021043	41032250	28	5	1.784	0.037209	APOBEC2
ENSG00000172939	3	38206580	38296979	134	20	1.784	0.037211	OXSR1
ENSG00000196378	8	145998499	146012730	67	12	1.784	0.037212	ZNF34
ENSG00000186834	17	43224684	43229468	10	5	1.784	0.037212	HEXIM1
ENSG00000166822	16	75476952	75499395	94	9	1.7839	0.037224	TMEM170A
ENSG00000244687	20	48697661	48732496	74	10	1.7835	0.037255	UBE2V1
ENSG00000173868	17	47300724	47308128	18	5	1.7832	0.037281	PHOSPHO1
ENSG00000166016	11	34172535	34379555	847	93	1.7827	0.037314	ABTB2
ENSG00000114388	3	50384761	50388522	6	2	1.7821	0.037368	NPRL2
ENSG00000184979	22	18632666	18660164	117	15	1.7813	0.037434	USP18
ENSG00000124786	6	8413301	8435794	109	10	1.7812	0.037442	SLC35B3
ENSG00000130307	19	17359985	17393595	119	20	1.7811	0.037447	USHBP1
ENSG00000267796	19	36239262	36245420	11	3	1.78	0.037537	LIN37
ENSG00000184530	6	127840600	127912962	339	19	1.7797	0.037563	C6orf58
ENSG00000138778	4	104026963	104119566	222	13	1.7793	0.037599	CENPE
ENSG00000214309	7	99724317	99726118	3	2	1.7788	0.03764	MBLAC1
ENSG00000164690	7	155592680	155604967	24	10	1.7787	0.037641	SHH
ENSG00000150627	4	176986985	177103978	503	25	1.7781	0.037695	WDR17
ENSG00000163273	2	232786530	232791113	8	3	1.7766	0.03782	NPPC
ENSG00000174483	11	66278077	66301098	62	9	1.7765	0.037828	BBS1
ENSG00000172322	12	10103915	10148293	272	19	1.7764	0.037834	CLEC12A
ENSG00000138796	4	108910870	108956331	126	9	1.7762	0.037847	HADH
ENSG00000151136	12	107712190	108053419	1103	65	1.776	0.037865	BTBD11
ENSG00000240563	1	62660503	62678000	135	21	1.7753	0.037924	L1TD1
ENSG00000163041	1	226249552	226259702	19	7	1.775	0.03795	H3F3A
ENSG00000124491	6	6144318	6321246	791	95	1.7744	0.037995	F13A1
ENSG00000124731	6	41235664	41254457	93	20	1.7744	0.037997	TREM1
ENSG00000164520	6	150204511	150219238	96	8	1.7734	0.03808	RAET1E
ENSG00000174456	12	110465872	110511491	114	20	1.7734	0.038082	C12orf76
ENSG00000166265	21	27838528	27945603	369	51	1.7733	0.038086	CYYR1
ENSG00000187766	21	46031996	46032871	2	1	1.7727	0.038141	KRTAP10-8
ENSG00000103375	16	25227052	25240261	68	10	1.7722	0.038177	AQP8
ENSG00000222007	2	236682499	236692031	42	4	1.7718	0.038214	AC064874.1
ENSG00000171357	1	46669006	46686933	24	8	1.7696	0.038396	LURAP1
ENSG00000142694	1	36787632	36789755	4	2	1.7692	0.038426	EVA1B
ENSG00000110429	11	33762485	33796089	112	16	1.7689	0.038453	FBXO3
ENSG00000106683	7	73497263	73536855	74	12	1.7663	0.038677	LIMK1
ENSG00000132470	17	73717408	73753899	92	17	1.7661	0.038689	ITGB4
ENSG00000198715	1	156259880	156265463	13	4	1.7655	0.038737	C1orf85
ENSG00000120158	9	4792869	4885917	424	34	1.7651	0.038771	RCL1
ENSG00000178175	5	71738479	71803554	208	20	1.7636	0.038901	ZNF366
ENSG00000221926	17	15531274	15587625	166	31	1.7631	0.038944	TRIM16
ENSG00000111837	6	10762956	10838764	203	23	1.7627	0.038972	MAK
ENSG00000103932	15	41809374	41836467	90	12	1.7627	0.038972	RPAP1
ENSG00000038382	5	14143811	14532235	1214	48	1.7626	0.038984	TRIO
ENSG00000189050	17	58029601	58042122	27	7	1.7622	0.039022	RNFT1
ENSG00000153774	16	75327596	75467383	580	15	1.762	0.039035	CFDP1
ENSG00000154175	3	100468000	100712359	831	52	1.7619	0.039043	ABI3BP
ENSG00000205078	16	77233294	77247112	82	11	1.7613	0.039098	SYCE1L
ENSG00000256349	11	66276550	66301084	67	9	1.7586	0.03932	CTD-3074O7.11
ENSG00000112137	6	12717893	13288645	1745	72	1.7585	0.039332	PHACTR1
ENSG00000183844	21	42676139	42729358	223	32	1.7581	0.039369	FAM3B
ENSG00000074527	12	96051583	96184930	623	44	1.7578	0.039387	NTN4
ENSG00000154856	18	10454625	10489945	140	25	1.7577	0.039395	APCDD1
ENSG00000106086	7	30067020	30170096	261	12	1.7576	0.039405	PLEKHA8
ENSG00000144455	3	3742498	4508965	3922	102	1.7575	0.039418	SUMF1
ENSG00000180479	19	38045684	38085673	126	19	1.7564	0.039506	ZNF571
ENSG00000251380	5	134779905	134783038	18	5	1.7554	0.039593	C5orf20
ENSG00000164120	4	175411328	175444305	156	30	1.7552	0.039616	HPGD
ENSG00000103184	16	5008318	5069159	313	34	1.7552	0.039616	SEC14L5
ENSG00000038210	4	25162263	25280714	428	29	1.7545	0.039674	PI4K2B
ENSG00000128829	15	40226347	40327797	409	24	1.7539	0.039728	EIF2AK4
ENSG00000137558	8	75736772	75767264	76	11	1.7538	0.03973	PI15
ENSG00000105398	19	48373723	48389654	75	12	1.7522	0.039867	SULT2A1
ENSG00000167914	17	38119226	38134019	74	17	1.7514	0.039937	GSDMA
ENSG00000145348	4	106962756	107242652	830	21	1.7513	0.039951	TBCK
ENSG00000122176	1	203309756	203320617	38	10	1.7508	0.039987	FMOD
ENSG00000164107	4	174446120	174451380	11	4	1.7502	0.040046	HAND2
ENSG00000175874	2	101962013	102004057	131	15	1.7501	0.040055	CREG2
ENSG00000095787	10	28821422	28912041	208	14	1.7485	0.040185	WAC
ENSG00000164675	7	123092454	123175131	170	22	1.7483	0.04021	IQUB
ENSG00000198743	21	35445870	35478559	58	13	1.7482	0.040217	SLC5A3
ENSG00000272962	21	35445870	35478561	58	13	1.7482	0.040217	SLC5A3
ENSG00000217930	16	4381550	4405608	69	15	1.7465	0.040364	PAM16
ENSG00000136104	13	51483814	51544592	108	18	1.7453	0.040466	RNASEH2B
ENSG00000120645	12	175931	287626	512	55	1.7442	0.04056	IQSEC3
ENSG00000158528	7	94536514	94925727	971	34	1.744	0.04058	PPP1R9A
ENSG00000160710	1	154554538	154600475	106	12	1.744	0.040581	ADAR
ENSG00000175606	8	74884672	74895018	45	6	1.7438	0.0406	TMEM70
ENSG00000180113	6	46655612	46672056	20	9	1.7436	0.040615	TDRD6
ENSG00000157601	21	42792231	42831141	218	15	1.7433	0.040641	MX1
ENSG00000111845	6	10694928	10710015	52	6	1.7433	0.040644	PAK1IP1
ENSG00000160868	7	99354604	99381888	42	14	1.7427	0.040694	CYP3A4
ENSG00000112116	6	52101479	52109335	28	9	1.7423	0.040729	IL17F
ENSG00000185055	7	105205567	105241322	128	26	1.7422	0.040735	EFCAB10
ENSG00000165660	10	126490354	126525239	95	13	1.7413	0.040814	FAM175B
ENSG00000251695	12	69186125	69187743	3	2	1.7408	0.040855	AC124890.1
ENSG00000197506	9	86890372	86955672	299	31	1.7408	0.040856	SLC28A3
ENSG00000189241	6	116597741	116601066	9	3	1.7407	0.040871	TSPYL1
ENSG00000135426	12	55341802	55378530	214	9	1.7403	0.040904	TESPA1
ENSG00000118733	1	102268130	102462586	747	61	1.7391	0.041008	OLFM3
ENSG00000165388	10	48355024	48373866	4	2	1.7391	0.041012	ZNF488
ENSG00000131379	3	14716606	14814541	287	35	1.739	0.041021	C3orf20
ENSG00000189157	4	77135193	77204933	426	24	1.7386	0.041048	FAM47E
ENSG00000119514	9	101569981	101612363	131	28	1.7386	0.041051	GALNT12
ENSG00000248835	1	54635333	54637997	11	4	1.7379	0.041117	AL357673.1
ENSG00000236320	17	33875144	33885117	43	10	1.7377	0.041131	SLFN14
ENSG00000267710	19	56784138	56821819	143	24	1.7376	0.041143	AC006116.20
ENSG00000118985	5	95220802	95297775	227	11	1.7372	0.041179	ELL2
ENSG00000173230	3	121382046	121468602	158	17	1.737	0.041191	GOLGB1
ENSG00000153250	2	161128662	161350305	525	23	1.7364	0.04125	RBMS1
ENSG00000164674	6	159071046	159185908	450	40	1.7359	0.041289	SYTL3
ENSG00000125107	16	58553855	58663790	371	14	1.7357	0.041307	CNOT1
ENSG00000163867	1	35449523	35497569	125	10	1.7353	0.041346	ZMYM6
ENSG00000063046	12	53399942	53435993	113	8	1.735	0.041369	EIF4B
ENSG00000176533	19	2511217	2702707	1021	92	1.7338	0.041479	GNG7
ENSG00000271741	1	35447134	35497342	137	11	1.7332	0.041528	RP11-244H3.4
ENSG00000161091	19	3538259	3574288	136	30	1.7325	0.041593	MFSD12
ENSG00000149577	11	117049449	117068160	68	12	1.7319	0.041642	SIDT2
ENSG00000063177	19	49118585	49122793	5	2	1.7319	0.041647	RPL18
ENSG00000158201	18	19230858	19284766	108	14	1.7308	0.041747	ABHD3
ENSG00000124444	19	44100544	44105309	7	4	1.7305	0.041771	ZNF576
ENSG00000184860	16	82031221	82045093	72	17	1.73	0.041812	SDR42E1
ENSG00000132142	17	35441923	35766909	598	31	1.7288	0.041922	ACACA
ENSG00000142453	19	10982189	11033453	73	11	1.7284	0.041957	CARM1
ENSG00000116750	1	192981380	193029237	52	12	1.7282	0.041974	UCHL5
ENSG00000254986	11	66247484	66277130	79	9	1.7276	0.042033	DPP3
ENSG00000021461	7	99425636	99463718	124	15	1.7274	0.042049	CYP3A43
ENSG00000185739	16	4239375	4292081	303	42	1.7271	0.042073	SRL
ENSG00000178425	6	116422012	116570660	422	27	1.7246	0.042301	NT5DC1
ENSG00000072840	4	5712924	5830772	663	61	1.723	0.042447	EVC
ENSG00000144152	2	112895962	112945791	161	28	1.7221	0.042529	FBLN7
ENSG00000176018	5	89811428	89825401	42	7	1.722	0.042534	LYSMD3
ENSG00000166200	15	49398268	49447858	151	21	1.7215	0.042579	COPS2
ENSG00000077348	19	41892279	41903384	41	7	1.721	0.042629	EXOSC5
ENSG00000135363	11	33880122	33913836	121	26	1.7193	0.042779	LMO2
ENSG00000186198	15	65337708	65345734	14	4	1.717	0.042991	SLC51B
ENSG00000095970	6	41126244	41130924	17	3	1.7166	0.043028	TREM2
ENSG00000267901	14	71683031	71683462	1	1	1.7164	0.04304	AC004817.1
ENSG00000069329	16	46690054	46723430	19	4	1.716	0.043081	VPS35
ENSG00000186792	3	50330262	50336899	12	3	1.7156	0.043113	HYAL3
ENSG00000171227	2	120187477	120196096	45	10	1.7144	0.043227	TMEM37
ENSG00000109618	4	25121627	25162204	101	21	1.7144	0.043227	SEPSECS
ENSG00000115896	2	198669426	199437305	2045	73	1.7142	0.043246	PLCL1
ENSG00000168148	1	228612546	228613026	2	1	1.7141	0.043254	HIST3H3
ENSG00000151364	11	77726761	77757237	164	19	1.7124	0.043414	KCTD14
ENSG00000164050	3	48445261	48471594	34	8	1.712	0.043451	PLXNB1
ENSG00000185303	10	81315608	81320153	38	10	1.7106	0.043576	SFTPA2
ENSG00000182963	17	42875816	42908184	82	17	1.7105	0.043587	GJC1
ENSG00000078549	7	31092076	31151089	217	41	1.71	0.043635	ADCYAP1R1
ENSG00000177885	17	73314157	73401790	248	12	1.7096	0.043667	GRB2
ENSG00000173402	3	49506146	49573048	110	11	1.7084	0.043781	DAG1
ENSG00000149476	11	61100682	61120767	28	6	1.708	0.043817	DAK
ENSG00000183166	7	71244476	71912136	2440	75	1.7071	0.043902	CALN1
ENSG00000238244	15	90890819	90892669	16	3	1.707	0.043909	GABARAPL3
ENSG00000116473	1	112084840	112259313	637	38	1.7069	0.043919	RAP1A
ENSG00000124160	20	44689624	44718591	79	13	1.7058	0.044021	NCOA5
ENSG00000146066	5	175815748	175816772	5	2	1.7057	0.044035	HIGD2A
ENSG00000164253	5	76721795	76916436	932	34	1.7054	0.044061	WDR41
ENSG00000188778	8	37820516	37824483	9	3	1.7053	0.044068	ADRB3
ENSG00000205464	5	81575281	81682796	216	20	1.7049	0.04411	ATP6AP1L
ENSG00000132975	13	27329341	27334922	14	5	1.7038	0.044205	GPR12
ENSG00000254505	14	24678789	24683075	11	6	1.7038	0.044211	CHMP4A
ENSG00000197077	22	25348697	25593415	832	53	1.7034	0.044247	KIAA1671
ENSG00000171208	16	47111614	47177908	50	7	1.7022	0.044362	NETO2
ENSG00000034693	6	143771944	143811147	102	15	1.6996	0.044607	PEX3
ENSG00000145022	3	49449639	49453908	5	2	1.699	0.044658	TCTA
ENSG00000103150	16	83932731	83949787	128	13	1.6989	0.044667	MLYCD
ENSG00000068724	2	47143296	47303276	778	53	1.6987	0.044688	TTC7A
ENSG00000150787	11	112097088	112140678	160	14	1.6985	0.044705	PTS
ENSG00000001630	7	91741465	91772266	75	7	1.6977	0.044781	CYP51A1
ENSG00000104804	19	49384222	49401990	78	9	1.6977	0.044781	TULP2
ENSG00000162148	11	61248592	61258403	41	9	1.6965	0.0449	PPP1R32
ENSG00000105672	19	36132647	36135773	7	4	1.6949	0.045045	ETV2
ENSG00000115808	2	37070783	37193615	336	22	1.6942	0.04511	STRN
ENSG00000163634	3	63819546	63849579	62	17	1.6942	0.045118	THOC7
ENSG00000185610	12	45408455	45444882	141	18	1.6931	0.045219	DBX2
ENSG00000114026	3	9791628	9829903	94	17	1.6927	0.045259	OGG1
ENSG00000143850	1	204187979	204346793	556	31	1.6924	0.04528	PLEKHA6
ENSG00000129474	14	23440383	23451851	18	5	1.6923	0.045294	AJUBA
ENSG00000164485	6	137464968	137494785	92	16	1.6923	0.045297	IL22RA2
ENSG00000176024	19	52430400	52452012	94	11	1.6921	0.045314	ZNF613
ENSG00000117222	1	205055270	205091143	113	15	1.6921	0.045316	RBBP5
ENSG00000164626	6	39156749	39197226	184	26	1.6916	0.04536	KCNK5
ENSG00000117266	1	205473723	205501921	148	37	1.6915	0.045375	CDK18
ENSG00000090989	4	56719782	56771200	126	19	1.691	0.045423	EXOC1
ENSG00000206527	3	123209667	123304032	335	23	1.6908	0.045433	PTPLB
ENSG00000164002	1	40974413	40982228	33	7	1.6882	0.045682	EXO5
ENSG00000142686	1	36179476	36185073	7	3	1.6878	0.045728	C1orf216
ENSG00000126267	19	36139125	36149763	31	10	1.686	0.045895	COX6B1
ENSG00000204010	10	91137813	91144962	26	8	1.6857	0.045926	IFIT1B
ENSG00000181035	19	19174808	19223697	103	15	1.6857	0.045927	SLC25A42
ENSG00000011114	14	93703896	93799438	280	17	1.6854	0.045952	BTBD7
ENSG00000156381	14	102973179	102976136	7	2	1.6851	0.045989	ANKRD9
ENSG00000118961	2	20883788	21022882	430	35	1.6849	0.046005	C2orf43
ENSG00000198718	14	45431411	45543634	293	15	1.6849	0.046006	FAM179B
ENSG00000161010	5	179261436	179289173	115	19	1.6848	0.046017	C5orf45
ENSG00000105464	19	48898132	48948188	147	34	1.6843	0.046058	GRIN2D
ENSG00000111671	12	6980099	6998522	46	7	1.6841	0.046082	SPSB2
ENSG00000060656	1	29563028	29653325	252	28	1.6838	0.046105	PTPRU
ENSG00000121797	3	46448654	46454488	27	7	1.6838	0.046106	CCRL2
ENSG00000139180	12	4758261	4798454	139	20	1.6835	0.046137	NDUFA9
ENSG00000189269	22	23950639	23974508	88	19	1.6834	0.046149	C22orf43
ENSG00000007384	16	108058	126354	65	12	1.6832	0.046169	RHBDF1
ENSG00000177119	12	45609770	45834187	667	22	1.6823	0.046255	ANO6
ENSG00000138496	3	122246771	122283424	95	13	1.6821	0.046272	PARP9
ENSG00000174165	11	66288108	66313709	75	10	1.6816	0.046327	ZDHHC24
ENSG00000133678	10	81838402	81852313	53	9	1.6811	0.046374	TMEM254
ENSG00000243927	21	35445524	35515334	167	21	1.6809	0.046386	MRPS6
ENSG00000108556	17	4801069	4806369	27	9	1.6805	0.046431	CHRNE
ENSG00000179454	14	45393522	45511525	312	15	1.68	0.046478	KLHL28
ENSG00000258247	12	95770984	95774672	41	8	1.6793	0.046547	RP11-167N24.6
ENSG00000065615	6	84569362	84677143	285	16	1.6783	0.046641	CYB5R4
ENSG00000135569	6	132909731	132910877	4	2	1.6779	0.046686	TAAR5
ENSG00000078369	1	1716729	1822495	156	18	1.6767	0.0468	GNB1
ENSG00000145050	3	51422478	51426828	6	1	1.6749	0.046974	MANF
ENSG00000184162	19	19312225	19314233	4	2	1.6745	0.04702	NR2C2AP
ENSG00000117650	1	211836114	211848960	33	9	1.6734	0.047125	NEK2
ENSG00000169570	5	118173017	118324240	479	33	1.673	0.047168	DTWD2
ENSG00000269026	19	58193413	58264943	207	24	1.673	0.047168	AC003006.7
ENSG00000171497	4	159630286	159644548	25	5	1.6729	0.047178	PPID
ENSG00000117595	1	209959036	209979465	67	9	1.6723	0.047231	IRF6
ENSG00000197595	13	113301358	113338811	182	26	1.6706	0.047403	C13orf35
ENSG00000243477	3	50333833	50336852	7	2	1.6702	0.047441	NAT6
ENSG00000123179	13	50234859	50265611	146	18	1.6699	0.047473	EBPL
ENSG00000176894	12	133264192	133297276	123	21	1.6698	0.047484	PXMP2
ENSG00000100697	14	95552565	95624347	184	16	1.6695	0.047514	DICER1
ENSG00000104973	19	50321539	50342073	42	11	1.6677	0.047691	MED25
ENSG00000140750	16	24930706	25026987	350	22	1.667	0.047762	ARHGAP17
ENSG00000168002	11	62529016	62534182	8	4	1.6664	0.047819	POLR2G
ENSG00000186458	20	238377	241737	17	2	1.6658	0.047877	DEFB132
ENSG00000180875	1	240652873	240775449	465	71	1.6657	0.047882	GREM2
ENSG00000130226	7	153584182	154685995	4726	225	1.6656	0.047894	DPP6
ENSG00000166847	16	23652713	23681195	98	8	1.6648	0.047977	DCTN5
ENSG00000271723	1	55107459	55207981	459	36	1.6639	0.048064	MROH7-TTC4
ENSG00000267335	19	49526210	49540152	82	18	1.6638	0.048073	CTB-60B18.6
ENSG00000137269	6	53659295	53788919	378	16	1.6633	0.048126	LRRC1
ENSG00000128519	7	122634759	122635754	6	2	1.6624	0.048214	TAS2R16
ENSG00000144724	3	61547243	62283288	2690	144	1.6618	0.048274	PTPRG
ENSG00000182580	3	184279572	184300197	69	15	1.6612	0.048333	EPHB3
ENSG00000033122	1	70034081	70617628	1909	69	1.6597	0.048489	LRRC7
ENSG00000184857	16	8874241	8891505	105	17	1.6596	0.048501	TMEM186
ENSG00000152778	10	91174343	91180758	33	11	1.659	0.048558	IFIT5
ENSG00000183346	10	63422719	63526524	392	20	1.659	0.048561	C10orf107
ENSG00000143756	1	224301789	224349749	207	13	1.6589	0.048565	FBXO28
ENSG00000126351	17	38214543	38250120	83	21	1.6584	0.048623	THRA
ENSG00000166123	16	46918290	46965209	37	9	1.6566	0.048805	GPT2
ENSG00000110436	11	35272753	35441610	689	39	1.6558	0.048878	SLC1A2
ENSG00000104524	8	144686083	144691943	20	5	1.6553	0.048927	PYCRL
ENSG00000048162	5	175810949	175815976	13	3	1.6552	0.048944	NOP16
ENSG00000132256	11	5684425	5959849	1731	47	1.6549	0.048974	TRIM5
ENSG00000064545	19	19229978	19249322	52	11	1.6544	0.049022	TMEM161A
ENSG00000143061	1	117117031	117210375	210	30	1.6542	0.049046	IGSF3
ENSG00000091137	7	107301080	107358254	126	21	1.6515	0.049315	SLC26A4
ENSG00000145451	4	175558065	175750465	804	51	1.6515	0.049317	GLRA3
ENSG00000007216	17	26800311	26824799	55	20	1.6512	0.049345	SLC13A2
ENSG00000174080	11	66330934	66336312	14	3	1.6503	0.049438	CTSF
ENSG00000125571	2	113670548	113676459	49	3	1.6499	0.049477	IL37
ENSG00000171551	2	233344537	233352538	24	10	1.6486	0.049615	ECEL1
ENSG00000091128	7	107663993	107770801	358	27	1.6475	0.049723	LAMB4
ENSG00000197841	19	35225060	35233777	16	7	1.6468	0.049796	ZNF181
ENSG00000070193	5	44303646	44389808	246	15	1.6468	0.049799	FGF10
ENSG00000014164	8	144519825	144623623	433	30	1.6458	0.049905	ZC3H3
ENSG00000267318	17	58018269	58050462	70	14	1.6453	0.049954	RP11-178C3.1
ENSG00000205409	11	5862158	5863182	10	1	1.6452	0.049964	OR52E6
ENSG00000108443	17	57970447	58027925	129	17	1.645	0.049981	RPS6KB1
ENSG00000163125	1	150335567	150449042	438	18	1.643	0.050194	RPRD2
ENSG00000159063	11	77811982	77850706	255	11	1.6425	0.050247	ALG8
ENSG00000137752	11	104896170	104972158	323	19	1.6422	0.050278	CASP1
ENSG00000196584	7	152341864	152373250	127	21	1.6421	0.050288	XRCC2
ENSG00000172493	4	87856154	88062206	696	32	1.6417	0.050321	AFF1
ENSG00000170584	5	162873532	162887146	26	7	1.6412	0.050375	NUDCD2
ENSG00000112110	6	160210844	160219468	68	8	1.64	0.050507	MRPL18
ENSG00000249693	4	57396775	57469673	284	36	1.6398	0.050526	THEGL
ENSG00000087995	17	60501228	60527454	101	8	1.6396	0.050546	METTL2A
ENSG00000109072	17	26691290	26700110	23	4	1.6388	0.050629	VTN
ENSG00000176386	9	116018115	116037869	65	15	1.6385	0.050656	CDC26
ENSG00000116747	1	193028552	193060907	61	13	1.6376	0.050755	TROVE2
ENSG00000186094	1	48998527	50489585	2861	52	1.6375	0.050758	AGBL4
ENSG00000112077	6	49572871	49604552	138	17	1.6374	0.050773	RHAG
ENSG00000090339	19	10381511	10397291	47	15	1.6372	0.050798	ICAM1
ENSG00000182511	15	91426925	91439006	43	9	1.6371	0.050802	FES
ENSG00000175573	11	65684279	65686588	14	4	1.6365	0.050864	C11orf68
ENSG00000146426	6	155153831	155578857	1637	115	1.6359	0.050935	TIAM2
ENSG00000163933	3	53122499	53164478	143	15	1.6357	0.050947	RFT1
ENSG00000120784	19	38104650	38183238	242	24	1.6344	0.051089	ZFP30
ENSG00000122592	7	27193335	27197555	11	5	1.6341	0.051114	HOXA7
ENSG00000118200	1	200708686	200829832	260	16	1.634	0.051128	CAMSAP2
ENSG00000225399	3	49297518	49298744	4	2	1.6338	0.051147	RP11-3B7.1
ENSG00000124785	6	5998232	6007200	27	4	1.6331	0.051228	NRN1
ENSG00000107249	9	3824127	4348392	2673	140	1.6328	0.051252	GLIS3
ENSG00000215298	8	23430157	23432974	13	3	1.6322	0.051317	FP15737
ENSG00000087074	19	49375649	49379314	23	3	1.6313	0.051415	PPP1R15A
ENSG00000198610	10	5237425	5260912	131	10	1.6312	0.051419	AKR1C4
ENSG00000163666	3	57231944	57260549	63	11	1.631	0.051442	HESX1
ENSG00000198498	4	164415594	164441691	77	9	1.6306	0.051488	TMA16
ENSG00000167685	19	56643968	56672262	114	21	1.6296	0.051597	ZNF444
ENSG00000105278	19	3804022	3869030	279	27	1.629	0.051652	ZFR2
ENSG00000262003	17	812872	814452	8	2	1.629	0.051658	RP11-676J12.7
ENSG00000104903	19	13209847	13213975	17	7	1.6289	0.051663	LYL1
ENSG00000159259	21	37757676	37791313	126	14	1.6283	0.051726	CHAF1B
ENSG00000243543	20	44162835	44168134	15	5	1.6281	0.05175	WFDC6
ENSG00000140795	16	46740891	46824319	55	8	1.6272	0.051848	MYLK3
ENSG00000105556	19	305575	344798	230	16	1.6269	0.051878	MIER2
ENSG00000182400	14	39617015	39639736	114	17	1.6259	0.051988	TRAPPC6B
ENSG00000180957	22	28247657	28316122	143	15	1.6258	0.052	PITPNB
ENSG00000181135	8	144766622	144796068	98	19	1.6256	0.052019	ZNF707
ENSG00000139899	14	24895738	24900160	20	6	1.625	0.052087	CBLN3
ENSG00000082497	1	210406144	210419976	30	9	1.6246	0.052126	SERTAD4
ENSG00000154114	11	120894781	120961484	128	12	1.624	0.052192	TBCEL
ENSG00000169131	5	178138593	178157703	80	6	1.6219	0.052416	ZNF354A
ENSG00000135847	1	180244515	180472089	782	24	1.6216	0.052449	ACBD6
ENSG00000163191	1	152004982	152020383	36	7	1.6215	0.052451	S100A11
ENSG00000008438	19	46522411	46526323	12	4	1.6212	0.052492	PGLYRP1
ENSG00000130635	9	137533620	137736686	1105	76	1.6208	0.052534	COL5A1
ENSG00000185585	9	127539437	127577164	82	20	1.6201	0.052603	OLFML2A
ENSG00000104960	19	50353992	50364001	34	9	1.6198	0.052635	PTOV1
ENSG00000096654	6	27418522	27440897	93	7	1.6198	0.052638	ZNF184
ENSG00000064655	20	45523263	45817492	1180	84	1.6194	0.052678	EYA2
ENSG00000155011	4	107842959	108204963	1114	73	1.6179	0.052837	DKK2
ENSG00000113504	5	1050499	1112150	264	39	1.6178	0.052848	SLC12A7
ENSG00000213417	17	39221369	39222131	3	2	1.617	0.052935	KRTAP2-4
ENSG00000270394	4	117220016	117221520	4	2	1.617	0.052939	MTRNR2L13
ENSG00000175105	3	88188254	88193815	17	5	1.615	0.053159	ZNF654
ENSG00000160714	1	154521053	154531504	18	5	1.6147	0.053185	UBE2Q1
ENSG00000247077	12	133287405	133299228	63	17	1.6142	0.05324	PGAM5
ENSG00000166183	14	104552016	104579098	102	18	1.6137	0.053292	ASPG
ENSG00000105357	19	50691443	50813802	634	63	1.6135	0.053319	MYH14
ENSG00000171700	20	62704534	62711323	15	6	1.6132	0.053346	RGS19
ENSG00000215462	13	50007495	50020554	34	8	1.6132	0.053356	AL136218.1
ENSG00000101230	20	13202418	13281298	386	43	1.6128	0.053398	ISM1
ENSG00000122786	7	134429003	134655479	758	53	1.6126	0.053418	CALD1
ENSG00000154781	3	14693271	14714166	76	10	1.6118	0.053506	CCDC174
ENSG00000242485	1	1337288	1342693	19	7	1.6111	0.053574	MRPL20
ENSG00000116663	1	11724181	11734411	46	12	1.6106	0.053633	FBXO6
ENSG00000007202	17	26941458	26972472	31	13	1.6104	0.05366	KIAA0100
ENSG00000140287	15	50534144	50558223	69	17	1.6082	0.053901	HDC
ENSG00000173660	1	46769303	46782448	24	8	1.6079	0.053932	UQCRH
ENSG00000197724	9	96338689	96441869	505	26	1.6078	0.053942	PHF2
ENSG00000011083	5	149569520	149602351	168	32	1.6077	0.053946	SLC6A7
ENSG00000188133	9	32783497	32787397	8	3	1.6074	0.05398	TMEM215
ENSG00000250722	5	42799982	42887494	315	26	1.6071	0.054019	SEPP1
ENSG00000161016	8	146015150	146017972	19	5	1.6067	0.05406	RPL8
ENSG00000162144	11	61116217	61129771	16	6	1.6053	0.054214	CYB561A3
ENSG00000105374	19	51874860	51875969	4	2	1.6052	0.054224	NKG7
ENSG00000164794	8	110975874	110988076	17	5	1.6051	0.054236	KCNV1
ENSG00000175514	11	67218772	67220200	7	1	1.6041	0.054347	GPR152
ENSG00000168769	4	106067032	106200973	393	29	1.6033	0.05443	TET2
ENSG00000243440	21	15964251	16031142	232	23	1.601	0.054689	AF165138.7
ENSG00000181873	1	228353516	228369958	34	9	1.601	0.05469	IBA57
ENSG00000159256	21	37692487	37758446	271	16	1.6002	0.054782	MORC3
ENSG00000186075	17	38024417	38034149	48	7	1.5998	0.054822	ZPBP2
ENSG00000124449	19	44220162	44224173	13	5	1.5994	0.054868	IRGC
ENSG00000143537	1	155023042	155035252	23	7	1.5991	0.054897	ADAM15
ENSG00000153896	19	35248981	35264134	22	8	1.599	0.054914	ZNF599
ENSG00000123836	1	207222801	207254369	76	13	1.5979	0.055034	PFKFB2
ENSG00000107738	10	73507316	73533255	100	25	1.5978	0.055042	C10orf54
ENSG00000164512	5	55395507	55529186	542	47	1.5978	0.055048	ANKRD55
ENSG00000105559	19	49340354	49371889	142	18	1.5974	0.055083	PLEKHA4
ENSG00000166262	15	49619159	49913128	1046	26	1.5969	0.055145	FAM227B
ENSG00000039987	19	12862516	12869272	7	5	1.596	0.055245	BEST2
ENSG00000197122	20	35973088	36034453	174	19	1.596	0.055246	SRC
ENSG00000130429	7	98971872	98992424	59	11	1.5949	0.055366	ARPC1B
ENSG00000085999	1	46713360	46744145	37	11	1.5945	0.055416	RAD54L
ENSG00000151503	11	134020014	134095348	185	20	1.5944	0.055418	NCAPD3
ENSG00000163982	4	4190530	4228616	221	24	1.5943	0.055436	OTOP1
ENSG00000105856	7	106809406	106842974	66	6	1.5941	0.055456	HBP1
ENSG00000174640	3	133651540	133771028	453	56	1.5924	0.055645	SLCO2A1
ENSG00000243667	2	68350068	68384692	100	16	1.5917	0.055722	WDR92
ENSG00000236338	7	135611542	135613214	4	2	1.5916	0.05574	AC015987.2
ENSG00000179038	11	66963391	66964638	3	2	1.5916	0.055743	AP001885.1
ENSG00000173926	5	126203406	126366500	461	14	1.5909	0.055812	MARCH3
ENSG00000188687	2	74443369	74570541	309	35	1.5909	0.055817	SLC4A5
ENSG00000214305	11	107650219	107652316	13	5	1.5907	0.055844	AP001024.1
ENSG00000214756	11	62432781	62435968	6	3	1.5903	0.055886	METTL12
ENSG00000117868	7	158523686	158622944	464	16	1.5897	0.055948	ESYT2
ENSG00000141577	17	79163393	79196799	161	27	1.5897	0.055953	AZI1
ENSG00000271698	8	145576888	145579269	7	2	1.5894	0.055981	GS1-393G12.13
ENSG00000146453	6	160221298	160241736	72	14	1.5894	0.055988	PNLDC1
ENSG00000125144	16	56700643	56701977	7	3	1.5889	0.056047	MT1G
ENSG00000167986	11	61066923	61110068	59	7	1.5887	0.056066	DDB1
ENSG00000095951	6	12008995	12165232	536	37	1.5883	0.056105	HIVEP1
ENSG00000168884	4	2743375	2758103	63	13	1.5882	0.056121	TNIP2
ENSG00000117308	1	24122089	24127271	1	1	1.5881	0.05613	GALE
ENSG00000115457	2	217497551	217529159	56	18	1.5881	0.056133	IGFBP2
ENSG00000151366	11	77779350	77791265	41	8	1.5879	0.05615	NDUFC2
ENSG00000189182	12	53083410	53097247	51	14	1.5872	0.056235	KRT77
ENSG00000089356	19	35606732	35615228	32	8	1.5872	0.056237	FXYD3
ENSG00000113369	5	90664541	90679176	26	10	1.5863	0.056332	ARRDC3
ENSG00000187626	6	28212401	28227011	48	15	1.5846	0.056529	ZKSCAN4
ENSG00000135480	12	52626304	52645970	66	13	1.5842	0.05657	KRT7
ENSG00000142046	19	41856816	41889988	87	11	1.584	0.056595	TMEM91
ENSG00000182150	9	98637983	98776842	450	23	1.583	0.056716	ERCC6L2
ENSG00000140564	15	91411822	91426688	43	10	1.5824	0.056781	FURIN
ENSG00000186283	1	179050512	179067158	59	16	1.5813	0.056906	TOR3A
ENSG00000115946	2	68384976	68403370	64	12	1.5812	0.056916	PNO1
ENSG00000136213	7	2443223	2474242	72	12	1.5802	0.057035	CHST12
ENSG00000073605	17	38060848	38076107	69	8	1.5798	0.057081	GSDMB
ENSG00000163467	1	156307105	156316786	17	5	1.5791	0.057152	TSACC
ENSG00000206530	3	113005777	113160457	644	25	1.579	0.057169	WDR52
ENSG00000042832	8	133879203	134147147	1084	49	1.5779	0.05729	TG
ENSG00000188340	1	158746472	158747425	2	1	1.577	0.057397	OR6N2
ENSG00000214029	12	133694740	133707059	46	9	1.5765	0.057454	ZNF891
ENSG00000142765	1	27668513	27680421	30	8	1.5758	0.057538	SYTL1
ENSG00000100445	14	24908972	24912111	21	3	1.5752	0.057604	SDR39U1
ENSG00000059915	10	104162376	104181296	25	10	1.575	0.057633	PSD
ENSG00000113248	5	140625147	140627799	10	4	1.5747	0.057658	PCDHB15
ENSG00000135486	12	54673977	54680872	7	4	1.5741	0.057736	HNRNPA1
ENSG00000204519	19	58193337	58228669	110	23	1.574	0.057743	ZNF551
ENSG00000036448	8	1993155	2113475	1232	64	1.5739	0.057755	MYOM2
ENSG00000197375	5	131705444	131731306	94	11	1.5739	0.057757	SLC22A5
ENSG00000167807	19	10416103	10426685	39	9	1.5731	0.057851	CTD-2369P2.10
ENSG00000267673	19	10416103	10426691	39	9	1.5731	0.057851	FDX1L
ENSG00000182070	11	5172239	5207612	291	15	1.572	0.057977	OR52A1
ENSG00000169085	8	67372238	67430759	206	25	1.5717	0.05801	C8orf46
ENSG00000188559	20	20370196	20693131	525	20	1.5714	0.058041	RALGAPA2
ENSG00000157106	16	18816175	18937776	336	15	1.5708	0.058114	SMG1
ENSG00000116675	1	65713902	65881552	521	29	1.5707	0.058123	DNAJC6
ENSG00000007402	3	50400233	50541675	330	23	1.5691	0.058313	CACNA2D2
ENSG00000143442	1	151375200	151431941	108	11	1.5689	0.058332	POGZ
ENSG00000172661	10	46222648	46288409	77	12	1.5688	0.058342	FAM21C
ENSG00000134013	8	23154702	23282841	880	45	1.5677	0.058474	LOXL2
ENSG00000172461	6	96463860	96663488	786	37	1.5673	0.058517	FUT9
ENSG00000163848	3	124944405	125094198	335	14	1.5673	0.05852	ZNF148
ENSG00000242498	15	90443159	90456188	42	13	1.5671	0.058542	C15orf38
ENSG00000256162	6	131148546	131158275	58	13	1.567	0.058558	SMLR1
ENSG00000206561	3	15491640	15563258	288	24	1.5653	0.058753	COLQ
ENSG00000213171	1	151772740	151778630	11	4	1.565	0.058789	LINGO4
ENSG00000124194	20	42875887	42909013	92	12	1.5646	0.058835	GDAP1L1
ENSG00000092009	14	24974559	24977471	12	5	1.5642	0.058887	CMA1
ENSG00000161057	7	102984701	103009842	41	9	1.5629	0.059036	PSMC2
ENSG00000122705	9	36190853	36304778	346	25	1.5625	0.059083	CLTA
ENSG00000111241	12	4537321	4554780	46	10	1.5624	0.059092	FGF6
ENSG00000186654	22	45064593	45133561	444	52	1.5624	0.059099	PRR5
ENSG00000138593	15	49280673	49338760	120	13	1.5615	0.059202	SECISBP2L
ENSG00000172869	5	118373467	118584833	601	27	1.5614	0.05922	DMXL1
ENSG00000174173	3	101280706	101285290	12	4	1.5613	0.05923	TRMT10C
ENSG00000203791	10	126436718	126480439	95	14	1.5612	0.059235	METTL10
ENSG00000169635	22	21771693	21805752	9	2	1.56	0.059377	HIC2
ENSG00000108064	10	60144782	60158981	48	10	1.5597	0.059418	TFAM
ENSG00000236980	3	49215065	49229291	21	6	1.559	0.059502	C3orf84
ENSG00000184566	11	33902189	33903338	4	2	1.5579	0.059625	AC132216.1
ENSG00000167994	11	61664773	61687741	64	20	1.5574	0.059686	RAB3IL1
ENSG00000177084	12	133200348	133263951	233	12	1.5574	0.059693	POLE
ENSG00000155714	16	21995186	22012433	18	8	1.557	0.05973	PDZD9
ENSG00000243749	1	35447136	35450954	16	5	1.557	0.059733	ZMYM6NB
ENSG00000163479	1	155978839	155990750	18	5	1.557	0.059735	SSR2
ENSG00000130948	9	98997588	99064434	229	27	1.5565	0.059797	HSD17B3
ENSG00000174374	7	74441226	74490064	37	8	1.5563	0.059818	WBSCR16
ENSG00000134461	10	5903580	5931869	206	19	1.5559	0.059867	ANKRD16
ENSG00000178252	3	49044495	49053386	7	3	1.5549	0.05998	WDR6
ENSG00000110218	11	93862094	93915138	222	20	1.5518	0.060357	PANX1
ENSG00000068028	3	50367219	50378411	23	5	1.5516	0.060379	RASSF1
ENSG00000131849	19	58944181	58951589	23	7	1.5515	0.060393	ZNF132
ENSG00000180016	17	3300398	3301704	2	1	1.5514	0.060404	OR1E1
ENSG00000198169	8	145946298	145981802	117	21	1.5512	0.060427	ZNF251
ENSG00000272104	3	50388323	50405354	22	5	1.5512	0.060428	XXcos-LUCA11.5
ENSG00000139684	13	47345391	47371367	69	13	1.5507	0.060489	ESD
ENSG00000074842	19	4641386	4670382	129	16	1.55	0.060568	C19orf10
ENSG00000185527	17	79617489	79630142	89	12	1.5497	0.060603	PDE6G
ENSG00000185619	4	699537	764428	244	25	1.5494	0.060637	PCGF3
ENSG00000196355	4	38628029	38666430	117	19	1.5493	0.060651	AC021860.1
ENSG00000267041	19	37205285	37263727	168	21	1.5493	0.060658	ZNF850
ENSG00000152430	2	198591603	198651486	77	9	1.5485	0.060756	BOLL
ENSG00000204852	12	111051832	111087235	49	13	1.5477	0.060851	TCTN1
ENSG00000196981	3	122130715	122134882	7	3	1.5464	0.061009	WDR5B
ENSG00000167972	16	2325882	2390747	149	22	1.5464	0.06101	ABCA3
ENSG00000116852	1	200938520	200992828	193	20	1.5451	0.061161	KIF21B
ENSG00000012779	10	45869661	45941561	358	29	1.5451	0.061166	ALOX5
ENSG00000131941	19	33469499	33555794	398	30	1.545	0.061178	RHPN2
ENSG00000250173	5	979480	981415	6	4	1.5449	0.06119	RP11-661C8.3
ENSG00000153558	3	33318517	33445154	324	21	1.5445	0.061229	FBXL2
ENSG00000124406	4	42410390	42659122	875	34	1.5445	0.06124	ATP8A1
ENSG00000132792	20	36322408	36500531	457	27	1.5444	0.061243	CTNNBL1
ENSG00000110244	11	116691419	116694022	15	7	1.5442	0.061265	APOA4
ENSG00000154342	1	228194752	228248961	165	22	1.544	0.061293	WNT3A
ENSG00000174886	19	5891287	5904017	50	11	1.5433	0.061379	NDUFA11
ENSG00000145390	4	120133742	120216672	248	15	1.5424	0.061488	USP53
ENSG00000213977	17	3566196	3571976	19	6	1.5422	0.061517	TAX1BP3
ENSG00000124596	6	41001366	41065526	172	17	1.5415	0.061597	OARD1
ENSG00000172728	8	33228342	33330940	363	20	1.5414	0.061606	FUT10
ENSG00000100284	22	35695268	35743985	153	17	1.5407	0.061699	TOM1
ENSG00000157388	3	53528683	53847760	1038	89	1.5405	0.061717	CACNA1D
ENSG00000228259	5	179078298	179079445	5	3	1.54	0.061778	AC136604.1
ENSG00000002822	7	1855429	2272878	2082	37	1.5395	0.061845	MAD1L1
ENSG00000071564	19	1609291	1652604	97	18	1.5394	0.06185	TCF3
ENSG00000163359	2	238232646	238323018	354	36	1.5391	0.061895	COL6A3
ENSG00000268656	2	27998851	28009186	14	4	1.5388	0.061922	AC110084.1
ENSG00000124208	20	48697661	48770174	147	18	1.5387	0.061945	TMEM189-UBE2V1
ENSG00000240849	20	48697663	48770335	147	18	1.5387	0.061945	TMEM189
ENSG00000164241	5	126378250	126409184	77	10	1.538	0.062021	C5orf63
ENSG00000023892	6	35265595	35289548	66	13	1.5373	0.062108	DEF6
ENSG00000066739	14	96747595	96830207	212	19	1.5372	0.062116	ATG2B
ENSG00000186971	21	31802572	31803216	6	2	1.5366	0.062195	KRTAP13-4
ENSG00000184304	14	30045687	30661104	1934	103	1.5366	0.062197	PRKD1
ENSG00000114503	3	196662273	196669468	33	8	1.5358	0.062294	NCBP2
ENSG00000240720	7	91741473	91808845	144	11	1.5353	0.062352	LRRD1
ENSG00000106299	7	123321989	123389121	163	14	1.5344	0.062467	WASL
ENSG00000205899	17	1173853	1174754	1	1	1.5341	0.0625	BHLHA9
ENSG00000176515	6	1080164	1105181	125	22	1.5339	0.062522	AL033381.1
ENSG00000169118	15	64457716	64648442	417	21	1.5337	0.062548	CSNK1G1
ENSG00000269095	19	17346749	17366257	71	19	1.5337	0.062551	AC010646.3
ENSG00000122378	10	82167585	82192753	83	17	1.5336	0.062567	FAM213A
ENSG00000113211	5	140529683	140532868	15	6	1.5334	0.062585	PCDHB6
ENSG00000183474	5	68856035	68890550	1	1	1.5332	0.06261	GTF2H2C
ENSG00000101079	20	35280169	35374481	141	24	1.5326	0.062681	NDRG3
ENSG00000146809	7	123207064	123277951	175	17	1.5323	0.062719	ASB15
ENSG00000256632	12	133264635	133291498	83	15	1.5318	0.062782	RP13-672B3.2
ENSG00000068001	3	50355221	50360337	5	2	1.5318	0.062785	HYAL2
ENSG00000165802	9	140342022	140353786	13	6	1.5314	0.062833	NSMF
ENSG00000127337	12	69753483	69784576	166	19	1.5314	0.062836	YEATS4
ENSG00000197406	14	102027688	102029789	1	1	1.5297	0.06305	DIO3
ENSG00000156427	5	170846660	170884627	91	18	1.5296	0.063056	FGF18
ENSG00000004139	17	26691378	26728065	78	8	1.5296	0.063062	SARM1
ENSG00000158825	1	20915441	20945401	146	23	1.5288	0.06316	CDA
ENSG00000180329	17	42750437	42767147	17	7	1.5286	0.063182	CCDC43
ENSG00000138767	4	78634541	78740769	208	15	1.5284	0.063202	CNOT6L
ENSG00000213024	19	50410082	50433020	94	19	1.5281	0.063244	NUP62
ENSG00000186298	12	111157485	111180744	54	9	1.5278	0.063277	PPP1CC
ENSG00000142166	21	34696734	34732168	109	19	1.527	0.063384	IFNAR1
ENSG00000007545	16	1662326	1727909	215	14	1.5258	0.063524	CRAMP1L
ENSG00000134365	1	196819371	196888102	235	17	1.5256	0.063553	CFHR4
ENSG00000132128	1	46726868	46769280	47	15	1.5256	0.06356	LRRC41
ENSG00000100918	14	24641062	24649463	24	8	1.5254	0.063582	REC8
ENSG00000162227	11	62538775	62554814	32	7	1.5248	0.063654	TAF6L
ENSG00000103018	16	69458428	69500169	155	20	1.5248	0.063654	CYB5B
ENSG00000106538	7	150035408	150038763	17	4	1.5245	0.06369	RARRES2
ENSG00000100836	14	23790498	23795394	9	5	1.5242	0.063727	PABPN1
ENSG00000129028	15	71173681	71185124	11	5	1.523	0.063882	THAP10
ENSG00000175899	12	9220260	9268825	148	11	1.5228	0.063902	A2M
ENSG00000009413	6	111620234	111804918	473	24	1.5221	0.063992	REV3L
ENSG00000169750	17	79989500	79992080	6	3	1.5218	0.064031	RAC3
ENSG00000198218	3	49067140	49131796	74	16	1.5217	0.064038	QRICH1
ENSG00000124766	6	21593972	21598847	4	2	1.5214	0.064079	SOX4
ENSG00000172009	19	2785458	2813599	86	11	1.5208	0.064155	THOP1
ENSG00000171703	20	62681189	62703700	75	18	1.5199	0.064272	TCEA2
ENSG00000161996	16	699311	717833	76	5	1.5194	0.064329	WDR90
ENSG00000142611	1	2985732	3355185	1775	132	1.5192	0.064362	PRDM16
ENSG00000100934	14	39501123	39578850	235	22	1.519	0.064379	SEC23A
ENSG00000110628	11	2920951	2946476	104	24	1.5182	0.064485	SLC22A18
ENSG00000161326	17	35849937	35873603	62	11	1.5177	0.064549	DUSP14
ENSG00000153066	16	11772936	11836734	209	18	1.5176	0.064551	TXNDC11
ENSG00000156983	3	9773413	9789702	30	11	1.5175	0.064574	BRPF1
ENSG00000134548	12	21679241	21690311	44	10	1.5174	0.064579	C12orf39
ENSG00000213079	6	155054459	155155192	232	15	1.5174	0.06458	SCAF8
ENSG00000128585	7	130794855	131181395	1092	74	1.5174	0.064586	MKLN1
ENSG00000153012	4	25000469	25032501	173	27	1.5168	0.06466	LGI2
ENSG00000263809	17	8271956	8286505	45	9	1.5166	0.06469	RP11-849F2.7
ENSG00000172867	12	53038342	53045948	21	10	1.5163	0.064718	KRT2
ENSG00000095627	10	115939029	115992063	125	12	1.5161	0.064744	TDRD1
ENSG00000106113	7	30692200	30739745	144	29	1.5161	0.064746	CRHR2
ENSG00000186297	15	27111510	27194354	315	44	1.5157	0.064793	GABRA5
ENSG00000082438	2	165510134	165700189	585	28	1.5156	0.064804	COBLL1
ENSG00000184900	21	46225532	46238694	56	13	1.5151	0.064879	SUMO3
ENSG00000090382	12	69742121	69748014	25	8	1.5142	0.06499	LYZ
ENSG00000167183	17	46029333	46035244	22	6	1.5136	0.065067	PRR15L
ENSG00000102886	16	30116131	30125177	16	6	1.5135	0.065076	GDPD3
ENSG00000071462	7	73097355	73119491	61	9	1.5135	0.065081	WBSCR22
ENSG00000222017	2	198557830	198639547	122	11	1.5134	0.065093	AC011997.1
ENSG00000198556	7	99070464	99101273	40	11	1.5124	0.065213	ZNF789
ENSG00000158516	7	129906667	129929638	69	10	1.5123	0.065233	CPA2
ENSG00000166140	15	41099284	41106767	28	5	1.5121	0.065256	ZFYVE19
ENSG00000135679	12	69201956	69239214	129	16	1.5116	0.065312	MDM2
ENSG00000182348	7	88388682	88966346	2687	90	1.5113	0.065355	ZNF804B
ENSG00000172046	3	49145479	49158371	15	6	1.511	0.065396	USP19
ENSG00000175137	1	249104648	249120832	41	10	1.5109	0.065401	SH3BP5L
ENSG00000205835	3	190570666	190610218	139	26	1.5102	0.065491	GMNC
ENSG00000229415	14	36942493	36983034	105	15	1.5094	0.065601	SFTA3
ENSG00000268702	14	23790839	23791484	1	1	1.5093	0.06561	AL049829.1
ENSG00000135374	11	34500340	34535352	154	17	1.509	0.065644	ELF5
ENSG00000135040	9	88556061	88637213	154	24	1.5087	0.065688	NAA35
ENSG00000103811	15	79213400	79241916	137	18	1.5081	0.065759	CTSH
ENSG00000186442	12	53183469	53189901	24	9	1.5078	0.065798	KRT3
ENSG00000198053	20	1875154	1920543	188	25	1.5073	0.065862	SIRPA
ENSG00000204859	1	6640061	6649340	11	5	1.507	0.065908	ZBTB48
ENSG00000166851	16	23688977	23701688	44	6	1.5067	0.065949	PLK1
ENSG00000179520	12	100750857	100815837	187	26	1.506	0.066034	SLC17A8
ENSG00000186017	19	36936021	36980804	116	12	1.5052	0.066139	ZNF566
ENSG00000197362	7	148766735	148787874	38	6	1.505	0.066167	ZNF786
ENSG00000261190	16	52039399	52112386	239	28	1.5049	0.066176	C16orf97
ENSG00000112305	6	71377479	71571718	499	24	1.5048	0.066188	SMAP1
ENSG00000132002	19	14625582	14640582	29	6	1.5046	0.066211	DNAJB1
ENSG00000110324	11	117857063	117872196	52	12	1.5044	0.066238	IL10RA
ENSG00000241685	7	98923521	98985787	137	18	1.5042	0.066265	ARPC1A
ENSG00000226364	17	50939481	50976948	206	19	1.5035	0.066356	AC102948.2
ENSG00000110900	12	31079362	31149534	349	44	1.5026	0.066469	TSPAN11
ENSG00000134215	1	108113782	108507766	1476	65	1.5016	0.0666	VAV3
ENSG00000268432	5	157160003	157161727	7	2	1.5015	0.066619	AC026407.1
ENSG00000164220	5	75911307	75919259	32	7	1.5014	0.066625	F2RL2
ENSG00000197723	17	40274756	40275371	1	1	1.5006	0.06673	HSPB9
ENSG00000056558	9	123664671	123691451	107	12	1.4999	0.066821	TRAF1
ENSG00000264194	17	10048831	10050277	7	3	1.4994	0.066879	AC000003.2
ENSG00000023572	1	193065598	193075244	17	6	1.4994	0.066891	GLRX2
ENSG00000177030	11	644233	706715	282	20	1.4993	0.066892	DEAF1
ENSG00000105568	19	52693292	52730687	146	21	1.4986	0.06699	PPP2R1A
ENSG00000158828	1	20959948	20978004	93	14	1.498	0.067069	PINK1
ENSG00000103549	16	30773066	30787628	15	6	1.4978	0.067093	RNF40
ENSG00000153246	2	160788519	160919121	520	33	1.4976	0.067124	PLA2R1
ENSG00000269121	16	12062000	12062333	1	1	1.4972	0.06717	AC007216.2
ENSG00000249471	19	58962971	58969200	19	6	1.4968	0.067222	ZNF324B
ENSG00000257446	19	12154620	12167127	34	7	1.4966	0.067252	ZNF878
ENSG00000167191	16	19868616	19897489	89	16	1.4963	0.067283	GPRC5B
ENSG00000168924	4	1813206	1857974	81	14	1.496	0.067327	LETM1
ENSG00000166974	18	32556892	32723434	483	38	1.496	0.067328	MAPRE2
ENSG00000129596	5	115140430	115152651	30	7	1.4951	0.067446	CDO1
ENSG00000136161	13	49063095	49107369	116	18	1.4944	0.067532	RCBTB2
ENSG00000116991	1	232533711	232697304	587	35	1.494	0.06759	SIPA1L2
ENSG00000140093	14	94749650	94759608	31	7	1.4939	0.067596	SERPINA10
ENSG00000168056	11	65306276	65326401	34	10	1.4939	0.067597	LTBP3
ENSG00000185338	16	11348262	11350036	2	1	1.4935	0.067656	SOCS1
ENSG00000166987	12	57914493	57923931	13	3	1.4934	0.067665	MBD6
ENSG00000125384	14	52781023	52795324	51	10	1.4932	0.067692	PTGER2
ENSG00000105229	19	4007644	4039384	153	17	1.4927	0.067757	PIAS4
ENSG00000196839	20	43248163	43280874	113	28	1.4923	0.067817	ADA
ENSG00000185332	17	79285074	79304474	96	13	1.4915	0.067918	TMEM105
ENSG00000060709	12	130880682	131200826	1613	120	1.491	0.067974	RIMBP2
ENSG00000133710	5	147405246	147516852	676	20	1.4899	0.068125	SPINK5
ENSG00000149289	11	109964087	110042566	298	19	1.4899	0.068127	ZC3H12C
ENSG00000196372	10	5680830	5708558	153	33	1.4893	0.068198	ASB13
ENSG00000258984	2	238875656	239008053	526	18	1.4892	0.068215	UBE2F-SCLY
ENSG00000212993	8	128426535	128432311	34	5	1.4886	0.068291	POU5F1B
ENSG00000072694	1	161551101	161648444	256	22	1.4885	0.068311	FCGR2B
ENSG00000159784	7	143050493	143059863	14	6	1.4879	0.068383	FAM131B
ENSG00000163632	3	63805038	63834312	58	17	1.4879	0.068391	C3orf49
ENSG00000006451	7	39663082	39747723	206	23	1.4876	0.06843	RALA
ENSG00000168806	15	43619974	43622803	4	2	1.4875	0.068437	LCMT2
ENSG00000122861	10	75668935	75677255	18	4	1.4875	0.068439	PLAU
ENSG00000167656	8	143866296	143868008	8	3	1.4873	0.068471	LY6D
ENSG00000137259	6	26033320	26033796	2	1	1.4869	0.068521	HIST1H2AB
ENSG00000181291	17	32907768	32966337	158	37	1.4867	0.068545	TMEM132E
ENSG00000011451	19	15532319	15560762	22	8	1.4864	0.06859	WIZ
ENSG00000146477	6	160769300	160876014	342	30	1.4851	0.068756	SLC22A3
ENSG00000254943	11	124761200	124762022	2	1	1.4847	0.068808	RP11-664I21.6
ENSG00000173214	6	111580551	111592370	31	9	1.4844	0.068853	KIAA1919
ENSG00000008838	17	38175350	38217468	141	21	1.4843	0.068859	MED24
ENSG00000166143	15	41107650	41120907	32	7	1.4838	0.068931	PPP1R14D
ENSG00000117501	1	170904612	171033906	563	30	1.4832	0.069007	MROH9
ENSG00000013288	4	6576902	6625089	188	28	1.4827	0.069081	MAN2B2
ENSG00000101265	20	4760669	4804291	308	40	1.4826	0.069094	RASSF2
ENSG00000168569	11	62539101	62559493	41	10	1.4824	0.069113	TMEM223
ENSG00000108702	17	32687347	32690250	15	6	1.4822	0.069147	CCL1
ENSG00000269559	4	75023327	75024085	1	1	1.4819	0.06918	AC093677.1
ENSG00000164823	8	90914087	90940116	77	15	1.4817	0.069213	OSGIN2
ENSG00000136378	15	79051545	79103773	267	18	1.4806	0.069361	ADAMTS7
ENSG00000213886	6	29523292	29527702	31	6	1.4802	0.069405	UBD
ENSG00000112773	6	82201156	82462491	897	39	1.4796	0.069487	FAM46A
ENSG00000011275	7	5659678	5821370	629	25	1.4783	0.069658	RNF216
ENSG00000092098	14	24615892	24629870	35	13	1.4772	0.069805	RNF31
ENSG00000136931	9	127243516	127269709	65	11	1.477	0.069843	NR5A1
ENSG00000196663	14	102829300	102968818	435	18	1.4762	0.069942	TECPR2
ENSG00000148343	9	131798900	131834361	82	14	1.4749	0.070115	FAM73B
ENSG00000154429	1	229456758	229479041	73	15	1.4748	0.070133	CCSAP
ENSG00000145975	6	4049668	4087578	156	20	1.4748	0.070134	FAM217A
ENSG00000116095	2	179345195	179381189	75	15	1.4736	0.070289	PLEKHA3
ENSG00000188641	1	97543299	98386605	2205	106	1.4734	0.070324	DPYD
ENSG00000149488	20	2517253	2622430	524	40	1.473	0.070373	TMC2
ENSG00000214732	6	42123279	42131156	56	10	1.473	0.070379	RP1-139D8.6
ENSG00000138678	4	84457067	84527028	245	19	1.4729	0.070386	AGPAT9
ENSG00000149257	11	75273101	75283828	51	10	1.4725	0.07044	SERPINH1
ENSG00000101160	20	57570240	57582302	46	8	1.4715	0.070582	CTSZ
ENSG00000183048	17	79670404	79688042	93	13	1.4712	0.070618	SLC25A10
ENSG00000125753	19	46009837	46030241	65	12	1.4709	0.070659	VASP
ENSG00000160801	3	46919236	46945287	63	15	1.4709	0.070661	PTH1R
ENSG00000125868	20	17550508	17590564	125	19	1.4693	0.070871	DSTN
ENSG00000143469	1	210111538	210337636	597	21	1.4693	0.070877	SYT14
ENSG00000103710	15	65345679	65369028	53	9	1.4691	0.070908	RASL12
ENSG00000120210	9	5131979	5185668	217	10	1.4687	0.070957	INSL6
ENSG00000083544	13	60970591	61148012	413	19	1.4685	0.070978	TDRD3
ENSG00000178403	4	113434672	113437328	4	2	1.4685	0.07098	NEUROG2
ENSG00000157985	2	236402733	237040444	2144	101	1.4681	0.071033	AGAP1
ENSG00000183044	16	8768422	8878432	811	81	1.468	0.071051	ABAT
ENSG00000133739	8	86019382	86058311	69	14	1.468	0.071058	LRRCC1
ENSG00000115275	2	74688184	74692537	4	2	1.4679	0.071064	MOGS
ENSG00000113269	5	179338651	179499118	429	35	1.4679	0.071072	RNF130
ENSG00000102796	13	52342129	52378293	80	21	1.4669	0.071197	DHRS12
ENSG00000106245	7	99006264	99017239	30	8	1.4665	0.071262	BUD31
ENSG00000082929	4	5526296	5529528	8	3	1.4663	0.071289	C4orf6
ENSG00000158019	2	28112808	28561768	1052	41	1.466	0.071318	BRE
ENSG00000118420	6	83602117	83775560	500	27	1.4658	0.071347	UBE3D
ENSG00000267303	19	10426147	10431354	16	5	1.4654	0.0714	CTD-2369P2.12
ENSG00000107796	10	90694831	90751147	148	32	1.4651	0.07144	ACTA2
ENSG00000138380	2	203776937	203851786	173	13	1.4648	0.071482	CARF
ENSG00000144410	2	207804278	207834198	86	12	1.4636	0.071651	CPO
ENSG00000259316	15	64472547	64665980	430	20	1.4635	0.071662	CTD-2116N17.1
ENSG00000167034	8	23536206	23540440	8	3	1.4635	0.071667	NKX3-1
ENSG00000130413	11	8413418	8615836	708	22	1.4632	0.071706	STK33
ENSG00000005486	7	75471920	75518244	110	19	1.4628	0.071757	RHBDD2
ENSG00000260415	12	52203789	52206636	7	3	1.4628	0.071764	AC068987.1
ENSG00000135119	12	117176096	117291436	460	40	1.4623	0.071834	RNFT2
ENSG00000198774	12	86198331	86230348	134	18	1.4616	0.071932	RASSF9
ENSG00000137491	11	74811608	74917594	426	29	1.461	0.072013	SLCO2B1
ENSG00000172421	17	60447579	60493837	142	25	1.4607	0.072052	EFCAB3
ENSG00000197894	4	99992132	100009952	102	14	1.4604	0.072092	ADH5
ENSG00000245017	12	98879322	98897633	66	12	1.4602	0.07212	RP11-181C3.1
ENSG00000120471	11	128804626	128813040	33	11	1.46	0.072139	TP53AIP1
ENSG00000179603	7	126078652	126893348	2647	67	1.46	0.072151	GRM8
ENSG00000154059	18	22006580	22033499	91	13	1.4598	0.072169	IMPACT
ENSG00000175544	11	67219877	67226699	27	6	1.4596	0.072204	CABP4
ENSG00000115183	2	159825146	160089170	911	47	1.4593	0.072236	TANC1
ENSG00000188051	19	17546318	17559376	43	10	1.4586	0.072333	TMEM221
ENSG00000115020	2	209130991	209223475	281	15	1.4581	0.072406	PIKFYVE
ENSG00000198758	1	110292702	110306649	59	17	1.458	0.072415	EPS8L3
ENSG00000160785	1	156163880	156182587	35	6	1.458	0.072425	SLC25A44
ENSG00000011590	19	36195429	36207940	34	11	1.4578	0.072444	ZBTB32
ENSG00000178636	4	120113928	120133799	67	12	1.4568	0.072581	RP11-455G16.1
ENSG00000178279	16	11361605	11363390	6	2	1.4565	0.072621	TNP2
ENSG00000121406	19	58038693	58068910	51	14	1.4565	0.072631	ZNF549
ENSG00000164741	8	12940870	13373167	2689	79	1.4563	0.072648	DLC1
ENSG00000215883	1	54638009	54665709	73	16	1.4562	0.072671	CYB5RL
ENSG00000166347	18	71920530	71959251	208	15	1.456	0.072697	CYB5A
ENSG00000147576	8	67342420	67383836	160	20	1.4558	0.072727	ADHFE1
ENSG00000114302	3	48782030	48885279	82	14	1.4553	0.072787	PRKAR2A
ENSG00000134375	1	201924619	201939789	41	8	1.4549	0.072849	TIMM17A
ENSG00000137942	1	93913688	94020218	159	26	1.4544	0.072914	FNBP1L
ENSG00000136754	10	27035522	27150016	426	20	1.4544	0.072924	ABI1
ENSG00000198890	1	107599267	107601916	3	2	1.4542	0.07295	PRMT6
ENSG00000109079	17	26662628	26674035	14	5	1.454	0.072978	TNFAIP1
ENSG00000114948	2	207308263	207485851	404	31	1.4537	0.07301	ADAM23
ENSG00000256407	1	54606897	54665746	199	27	1.4536	0.073033	RP11-446E24.4
ENSG00000173137	8	145596790	145618457	38	8	1.4533	0.073069	ADCK5
ENSG00000124256	20	56178902	56195632	48	15	1.4531	0.073102	ZBP1
ENSG00000108773	17	40265126	40273376	15	3	1.4525	0.073179	KAT2A
ENSG00000158158	2	97426639	97477628	84	11	1.4525	0.07318	CNNM4
ENSG00000146197	6	35182190	35220856	65	12	1.4525	0.073183	SCUBE3
ENSG00000187527	3	192992579	193096632	444	33	1.4524	0.073199	ATP13A5
ENSG00000203780	10	127585108	127698161	353	16	1.452	0.073253	FANK1
ENSG00000171115	7	150147718	150176480	71	12	1.4519	0.073267	GIMAP8
ENSG00000187701	1	248813232	248814185	1	1	1.4517	0.07329	OR2T27
ENSG00000162076	16	2933187	2949383	100	13	1.4514	0.073338	FLYWCH2
ENSG00000197536	5	131746328	131811736	205	17	1.4514	0.073341	C5orf56
ENSG00000197992	12	10183276	10218565	70	12	1.451	0.073391	CLEC9A
ENSG00000185043	15	90773207	90777279	27	6	1.4504	0.073471	CIB1
ENSG00000120217	9	5450503	5470566	85	17	1.4504	0.073474	CD274
ENSG00000172890	11	71164155	71235153	327	18	1.4501	0.073511	NADSYN1
ENSG00000179873	19	56296770	56348166	337	46	1.4501	0.073513	NLRP11
ENSG00000172653	17	34181955	34195895	33	6	1.4501	0.073516	C17orf66
ENSG00000092208	14	39583427	39606177	106	23	1.4499	0.073542	GEMIN2
ENSG00000064490	19	19303008	19312678	38	7	1.4491	0.073656	RFXANK
ENSG00000147526	8	38585704	38710546	331	27	1.4489	0.073684	TACC1
ENSG00000185567	14	105403581	105444694	147	24	1.4485	0.07374	AHNAK2
ENSG00000121274	16	50186829	50269221	150	14	1.448	0.073807	PAPD5
ENSG00000080824	14	102547075	102606036	174	18	1.448	0.073811	HSP90AA1
ENSG00000154518	2	176040986	176049335	37	8	1.4478	0.073841	ATP5G3
ENSG00000250644	11	1768897	1780281	42	10	1.4473	0.073907	RP11-295K3.1
ENSG00000100911	14	24612574	24616779	5	3	1.447	0.073946	PSME2
ENSG00000185745	10	91152303	91163745	28	7	1.4463	0.074043	IFIT1
ENSG00000197020	19	21905568	21950430	203	12	1.4445	0.074305	ZNF100
ENSG00000186193	9	139956581	139965040	28	5	1.4438	0.074391	SAPCD2
ENSG00000185361	19	4639530	4655580	60	15	1.4436	0.074428	TNFAIP8L1
ENSG00000212928	14	57671888	57673291	6	1	1.4435	0.074434	AL391152.1
ENSG00000269242	19	12754645	12759211	10	4	1.4435	0.074438	CTD-2192J16.22
ENSG00000198846	8	59717977	60031767	953	61	1.4433	0.074468	TOX
ENSG00000128652	2	177001340	177037830	87	14	1.4428	0.074534	HOXD3
ENSG00000117411	1	44444615	44456840	29	10	1.4427	0.074547	B4GALT2
ENSG00000099204	10	116190872	116444762	893	66	1.4427	0.074558	ABLIM1
ENSG00000177301	1	111136202	111174096	114	16	1.4422	0.074628	KCNA2
ENSG00000273398	2	68358370	68488362	379	19	1.4419	0.074663	RP11-474G23.1
ENSG00000110987	12	122457328	122499948	133	28	1.4417	0.074701	BCL7A
ENSG00000109654	4	154073494	154260472	623	45	1.4411	0.074777	TRIM2
ENSG00000188529	1	24291294	24307417	11	5	1.441	0.074795	SRSF10
ENSG00000115844	2	172964167	172967628	5	3	1.4409	0.074803	DLX2
ENSG00000136883	9	116848406	116861507	62	15	1.4403	0.074895	KIF12
ENSG00000142186	11	65292548	65306175	23	9	1.4401	0.074921	SCYL1
ENSG00000188316	10	118609023	118671299	99	17	1.4399	0.074943	ENO4
ENSG00000175756	1	1309110	1310875	8	4	1.4392	0.075049	AURKAIP1
ENSG00000171804	19	38375463	38397317	42	10	1.439	0.07508	WDR87
ENSG00000249860	10	57358750	57360488	9	4	1.4379	0.075238	MTRNR2L5
ENSG00000254827	11	2909010	2924970	57	17	1.4377	0.075257	SLC22A18AS
ENSG00000143093	1	110574199	110617263	95	16	1.4371	0.075347	STRIP1
ENSG00000203837	10	118187379	118237469	180	15	1.4364	0.075443	PNLIPRP3
ENSG00000015413	16	89679716	89704839	128	25	1.4363	0.075452	DPEP1
ENSG00000178913	5	140698057	140700330	6	3	1.4363	0.075459	TAF7
ENSG00000151360	2	3705785	3750261	229	25	1.4356	0.075552	ALLC
ENSG00000186007	1	205350506	205425082	262	34	1.4347	0.075684	LEMD1
ENSG00000165046	8	38243725	38267045	33	6	1.4345	0.075719	LETM2
ENSG00000180305	20	44258165	44259835	10	2	1.4336	0.075845	WFDC10A
ENSG00000237521	19	9361606	9362820	5	2	1.4336	0.07585	OR7E24
ENSG00000196963	5	140560980	140565793	20	5	1.4332	0.075897	PCDHB16
ENSG00000168243	1	235710987	235814054	492	46	1.4327	0.075979	GNG4
ENSG00000071205	4	148653214	148993931	980	60	1.4326	0.075987	ARHGAP10
ENSG00000137872	15	47476298	48066420	2270	71	1.4322	0.076037	SEMA6D
ENSG00000113734	5	172571445	172591390	56	11	1.4321	0.076056	BNIP1
ENSG00000099385	16	30844947	30906281	77	9	1.4312	0.076189	BCL7C
ENSG00000105397	19	10461209	10491352	95	19	1.431	0.076209	TYK2
ENSG00000082556	8	54138284	54164257	162	18	1.4308	0.076242	OPRK1
ENSG00000159176	1	201452658	201478584	140	21	1.4308	0.076246	CSRP1
ENSG00000184828	18	45553044	45937123	1599	134	1.4307	0.076263	ZBTB7C
ENSG00000204403	11	104756445	104769397	37	5	1.4307	0.076265	CASP12
ENSG00000162571	1	1109264	1133315	134	15	1.4306	0.076276	TTLL10
ENSG00000197901	11	62703857	62752455	137	18	1.4299	0.076373	SLC22A6
ENSG00000188234	10	46321042	46349323	2	1	1.4298	0.076383	AGAP4
ENSG00000136717	2	127805603	127864931	287	30	1.4295	0.076426	BIN1
ENSG00000263711	18	70818476	70931715	403	29	1.4293	0.076459	RP11-169F17.1
ENSG00000165494	11	82868030	82898493	70	9	1.4288	0.07653	PCF11
ENSG00000249853	6	114376750	114664209	697	57	1.4285	0.076578	HS3ST5
ENSG00000160194	21	44299754	44333414	170	17	1.4273	0.076748	NDUFV3
ENSG00000212933	21	46074130	46074576	3	2	1.4272	0.076756	KRTAP12-4
ENSG00000262660	17	79670401	79687569	84	12	1.4268	0.076819	SLC25A10
ENSG00000141971	19	17516531	17544533	121	18	1.4267	0.076836	MVB12A
ENSG00000151917	6	56819773	56892140	181	11	1.4246	0.077136	BEND6
ENSG00000031823	19	5916150	5978153	114	22	1.4245	0.077145	RANBP3
ENSG00000104689	8	23047965	23082639	138	22	1.4241	0.077205	TNFRSF10A
ENSG00000120370	1	170501270	170522587	42	12	1.4241	0.077209	GORAB
ENSG00000039123	5	54603588	54721409	265	8	1.4234	0.07731	SKIV2L2
ENSG00000154839	18	47901365	47920543	129	14	1.4234	0.077313	SKA1
ENSG00000131187	5	176829141	176836577	15	6	1.4234	0.077315	F12
ENSG00000148357	9	133046882	133309510	515	80	1.4233	0.07733	HMCN2
ENSG00000115263	2	162999392	163008914	15	3	1.4232	0.077341	GCG
ENSG00000198874	7	66460160	66704501	1582	26	1.423	0.07737	TYW1
ENSG00000179909	19	58208735	58220579	41	9	1.4228	0.07739	ZNF154
ENSG00000160207	21	44949072	45079374	240	13	1.422	0.077514	HSF2BP
ENSG00000106052	7	27778950	27884183	296	27	1.4211	0.077645	TAX1BP1
ENSG00000169688	16	56685811	56687116	9	2	1.4209	0.077677	MT1B
ENSG00000180929	3	51989330	51991509	7	4	1.4204	0.07775	GPR62
ENSG00000115594	2	102681004	102796334	453	38	1.4181	0.078084	IL1R1
ENSG00000142867	1	85731931	85742773	46	14	1.4179	0.078109	BCL10
ENSG00000103043	16	70721342	70835064	317	36	1.4173	0.078198	VAC14
ENSG00000172197	6	20100935	20212670	468	63	1.4166	0.078302	MBOAT1
ENSG00000092847	1	36335409	36395211	82	11	1.4159	0.078396	2001-08-01
ENSG00000138442	2	203739505	203879521	329	15	1.4159	0.078402	WDR12
ENSG00000164112	4	122680088	122686582	24	6	1.4159	0.078408	TMEM155
ENSG00000160695	11	118938403	118952688	54	9	1.4151	0.078523	VPS11
ENSG00000145808	5	128795958	129074376	1002	34	1.4147	0.078583	ADAMTS19
ENSG00000198369	2	65537985	65659771	454	28	1.4146	0.078595	SPRED2
ENSG00000160716	1	154540257	154552502	25	9	1.4146	0.078598	CHRNB2
ENSG00000269554	1	2121237	2123179	4	2	1.4131	0.078808	AL590822.2
ENSG00000072818	17	7239848	7254797	26	9	1.4131	0.078812	ACAP1
ENSG00000131848	19	56732681	56879752	594	73	1.4119	0.078984	ZSCAN5A
ENSG00000173548	15	75940247	75954642	37	11	1.4116	0.079033	SNX33
ENSG00000177191	19	41931264	41934635	12	4	1.4108	0.079151	B3GNT8
ENSG00000111665	12	6953957	6961230	11	5	1.4108	0.079154	CDCA3
ENSG00000145283	4	87744621	87770416	53	16	1.4106	0.079178	SLC10A6
ENSG00000170923	19	9212945	9213982	5	2	1.4106	0.079183	OR7G2
ENSG00000148362	9	139886870	139888436	2	1	1.41	0.079266	C9orf142
ENSG00000224877	17	79213039	79215081	9	5	1.41	0.079269	C17orf89
ENSG00000163218	1	153302596	153321316	84	7	1.4097	0.079311	PGLYRP4
ENSG00000183397	19	3539152	3544028	16	5	1.4093	0.079381	C19orf71
ENSG00000120686	13	38923986	38937140	52	9	1.4087	0.079469	UFM1
ENSG00000102804	13	45007655	45151283	333	17	1.4086	0.079476	TSC22D1
ENSG00000043514	1	40306723	40349183	117	16	1.4082	0.079534	TRIT1
ENSG00000024048	6	42531800	42661242	375	19	1.4079	0.079576	UBR2
ENSG00000128040	4	57676026	57687908	54	14	1.4078	0.079591	SPINK2
ENSG00000108753	17	36046435	36105237	180	35	1.4065	0.079781	HNF1B
ENSG00000197780	1	109605108	109618624	61	15	1.4063	0.079815	TAF13
ENSG00000186918	8	28203102	28260218	115	19	1.4061	0.079848	ZNF395
ENSG00000205318	6	10633993	10647501	39	9	1.406	0.079862	GCNT6
ENSG00000124789	6	17615269	17706656	272	25	1.406	0.079865	NUP153
ENSG00000158169	9	97861336	98079991	258	19	1.4059	0.079876	FANCC
ENSG00000184613	12	44902058	45315631	1496	48	1.405	0.080006	NELL2
ENSG00000079102	8	92967203	93115514	212	12	1.4049	0.080027	RUNX1T1
ENSG00000155465	14	23242431	23299029	285	33	1.4047	0.080058	SLC7A7
ENSG00000111640	12	6643093	6647537	20	4	1.4046	0.080066	GAPDH
ENSG00000134470	10	5990855	6020150	157	31	1.4041	0.080142	IL15RA
ENSG00000160349	9	138413284	138418378	27	9	1.4038	0.080195	LCN1
ENSG00000134955	11	124932963	124959131	162	31	1.4036	0.080217	SLC37A2
ENSG00000119397	9	123837141	123939888	276	18	1.4034	0.080243	CNTRL
ENSG00000111481	12	54694986	54745633	72	11	1.4021	0.080439	COPZ1
ENSG00000255330	6	127759551	127840146	227	24	1.4012	0.08058	SOGA3
ENSG00000214338	6	127759551	127840500	227	24	1.4012	0.08058	SOGA3
ENSG00000002834	17	37026112	37078023	206	34	1.4007	0.080654	LASP1
ENSG00000187037	7	37723399	37873390	549	26	1.4004	0.080696	GPR141
ENSG00000107742	10	73818793	73848790	110	15	1.3997	0.080796	SPOCK2
ENSG00000103313	16	3292028	3306627	56	7	1.3995	0.08083	MEFV
ENSG00000135968	2	109065017	109125871	226	12	1.3989	0.080928	GCC2
ENSG00000138413	2	209100951	209130798	77	16	1.3987	0.08095	IDH1
ENSG00000146039	6	25754927	25781419	122	19	1.3985	0.080978	SLC17A4
ENSG00000104812	19	49471382	49496567	46	9	1.3985	0.080985	GYS1
ENSG00000196227	20	58508819	58523735	13	5	1.3983	0.081014	FAM217B
ENSG00000171459	9	125512019	125513062	6	1	1.3977	0.081098	OR1L6
ENSG00000205108	9	34723052	34729464	27	6	1.3975	0.081138	FAM205A
ENSG00000081138	18	63417488	63548638	516	30	1.3974	0.081154	CDH7
ENSG00000173530	8	22993101	23021543	111	24	1.397	0.081209	TNFRSF10D
ENSG00000105419	19	47906381	47922780	23	7	1.397	0.08121	MEIS3
ENSG00000160193	21	44263204	44299678	191	16	1.3968	0.081237	WDR4
ENSG00000197479	5	140579183	140582618	12	6	1.3966	0.081273	PCDHB11
ENSG00000179941	12	76738254	76742222	7	3	1.3964	0.081301	BBS10
ENSG00000177728	17	73437240	73496171	188	15	1.3957	0.081407	KIAA0195
ENSG00000197273	1	42628362	42630389	5	2	1.3951	0.081493	GUCA2A
ENSG00000105889	7	22459063	22672544	764	52	1.3949	0.081519	STEAP1B
ENSG00000179709	19	56459198	56499995	225	26	1.3948	0.081544	NLRP8
ENSG00000164211	5	110831731	110848288	32	9	1.3947	0.081554	STARD4
ENSG00000084070	1	40810522	40888998	216	27	1.3947	0.081559	SMAP2
ENSG00000136541	2	158175137	158184225	16	3	1.3946	0.081573	ERMN
ENSG00000103995	15	49005125	49103343	210	21	1.3943	0.081611	CEP152
ENSG00000144043	2	71213068	71222075	35	8	1.3939	0.08168	TEX261
ENSG00000115827	2	172290727	172341562	181	10	1.3927	0.081859	DCAF17
ENSG00000167653	8	143751726	143764142	65	5	1.3911	0.0821	PSCA
ENSG00000172123	17	33738079	33760302	95	14	1.3899	0.082275	SLFN12
ENSG00000149541	11	62382768	62389647	6	2	1.3899	0.082279	B3GAT3
ENSG00000171310	12	104849073	105155792	1381	115	1.3899	0.082282	CHST11
ENSG00000170788	10	82095861	82116511	62	14	1.3898	0.082294	DYDC1
ENSG00000181408	17	80332153	80333462	1	1	1.3894	0.08236	UTS2R
ENSG00000157020	3	10334815	10362862	112	18	1.3893	0.082365	SEC13
ENSG00000100473	14	31343720	31364271	67	20	1.3892	0.082382	COCH
ENSG00000112874	5	102884556	102898494	49	8	1.389	0.082418	NUDT12
ENSG00000160190	21	43916118	44001550	453	30	1.3873	0.082675	SLC37A1
ENSG00000139737	13	78272023	78338377	149	24	1.3872	0.082696	SLAIN1
ENSG00000182836	5	41307056	41510730	596	35	1.3869	0.082742	PLCXD3
ENSG00000174516	11	66234216	66244808	21	6	1.3861	0.08286	PELI3
ENSG00000167280	17	77071021	77084681	92	18	1.386	0.082875	ENGASE
ENSG00000230062	6	46714654	46727243	24	8	1.3858	0.082902	ANKRD66
ENSG00000111269	12	12764761	12798042	72	11	1.3854	0.08296	CREBL2
ENSG00000165682	12	10138241	10166023	170	17	1.3853	0.082987	CLEC1B
ENSG00000150347	10	63661059	63856703	540	54	1.3846	0.083086	ARID5B
ENSG00000110237	11	73019334	73080136	183	14	1.3845	0.083098	ARHGEF17
ENSG00000172469	6	96025419	96057333	118	12	1.3843	0.083135	MANEA
ENSG00000203877	6	84562985	84567234	12	2	1.3841	0.083162	RIPPLY2
ENSG00000261794	15	30896329	30906764	10	3	1.3834	0.083266	GOLGA8H
ENSG00000109107	17	26900133	26904282	5	2	1.3832	0.083305	ALDOC
ENSG00000100341	22	44275558	44287893	61	9	1.3829	0.083346	PNPLA5
ENSG00000171403	17	39722096	39728310	11	2	1.3828	0.083356	KRT9
ENSG00000205808	9	4662298	4665256	7	3	1.3827	0.083382	PPAPDC2
ENSG00000205758	21	34961647	35016232	73	19	1.3823	0.083433	CRYZL1
ENSG00000100281	22	35653445	35691800	85	4	1.3823	0.083433	HMGXB4
ENSG00000268635	11	77184416	77188074	12	6	1.3823	0.083439	DKFZP434E1119
ENSG00000188909	11	122848278	122852428	6	2	1.3823	0.083446	BSX
ENSG00000116539	1	155305059	155532598	352	15	1.382	0.083479	ASH1L
ENSG00000058668	1	203595689	203713209	311	37	1.381	0.083635	ATP2B4
ENSG00000163528	3	14153580	14166370	44	10	1.3808	0.083677	CHCHD4
ENSG00000143622	1	155867599	155881195	25	4	1.3807	0.083684	RIT1
ENSG00000248540	15	74418256	74421619	7	3	1.3807	0.083686	RP11-247C2.2
ENSG00000164953	8	94767072	94831462	92	20	1.3805	0.083713	TMEM67
ENSG00000196357	19	36673188	36737159	245	22	1.3803	0.08375	ZNF565
ENSG00000145384	4	120238405	120243545	44	4	1.3799	0.083816	FABP2
ENSG00000079215	5	36606457	36688436	249	46	1.3797	0.083843	SLC1A3
ENSG00000108839	17	6899384	6914055	56	8	1.3795	0.083864	ALOX12
ENSG00000161573	17	34303529	34308532	22	6	1.3795	0.083867	CCL16
ENSG00000168036	3	41236328	41301587	124	18	1.3793	0.083902	CTNNB1
ENSG00000138316	10	72432559	72522197	506	51	1.3792	0.083917	ADAMTS14
ENSG00000261732	16	1682260	1736716	190	13	1.3791	0.083926	LA16c-431H6.6
ENSG00000072778	17	7120444	7128592	20	8	1.379	0.083949	ACADVL
ENSG00000151116	11	18551156	18610294	184	15	1.379	0.083954	UEVLD
ENSG00000162873	1	205305220	205326218	112	19	1.3787	0.08399	KLHDC8A
ENSG00000119457	9	115641200	115653193	36	11	1.3786	0.084007	SLC46A2
ENSG00000175048	6	157802165	158099178	1235	80	1.3786	0.08401	ZDHHC14
ENSG00000127540	19	1597171	1605480	12	4	1.3786	0.084011	UQCR11
ENSG00000176871	12	118470712	118500235	100	15	1.3784	0.084038	WSB2
ENSG00000178057	3	49057892	49060928	1	1	1.3783	0.08406	NDUFAF3
ENSG00000134321	2	7005937	7038370	54	11	1.378	0.084102	RSAD2
ENSG00000157303	9	95820989	95847420	105	15	1.3777	0.084153	SUSD3
ENSG00000164970	9	34398182	34458568	199	21	1.3775	0.084179	FAM219A
ENSG00000117984	11	1773982	1785222	36	7	1.3775	0.084184	CTSD
ENSG00000088448	13	111530887	111567416	123	12	1.3773	0.084212	ANKRD10
ENSG00000119231	3	196594727	196661585	221	16	1.3772	0.084218	SENP5
ENSG00000133937	14	95234553	95236562	5	3	1.3763	0.084368	GSC
ENSG00000140650	16	8882680	8943188	347	21	1.376	0.08441	PMM2
ENSG00000111371	12	46576846	46663800	207	31	1.3758	0.084436	SLC38A1
ENSG00000173077	9	117904097	118164923	1068	55	1.3757	0.08445	DEC1
ENSG00000176928	5	74323289	74326724	16	6	1.3754	0.084499	GCNT4
ENSG00000180205	20	44236578	44259907	121	14	1.3748	0.084604	WFDC9
ENSG00000070404	19	676392	683385	24	9	1.3747	0.084608	FSTL3
ENSG00000181264	11	120195838	120204391	18	5	1.3744	0.084654	TMEM136
ENSG00000267795	16	4838398	4846492	29	10	1.3743	0.084667	SMIM22
ENSG00000163382	1	156561554	156564091	13	1	1.3743	0.084671	APOA1BP
ENSG00000162374	1	50513686	50669458	230	30	1.3737	0.084772	ELAVL4
ENSG00000222020	2	240323130	240324058	5	2	1.3725	0.084951	AC062017.1
ENSG00000167635	19	36705504	36729676	102	12	1.3722	0.085002	ZNF146
ENSG00000011332	19	38701646	38720354	68	14	1.3719	0.085045	DPF1
ENSG00000118579	4	17616254	17635728	83	10	1.3718	0.085061	MED28
ENSG00000042781	1	215796236	216596738	2655	123	1.3711	0.085178	USH2A
ENSG00000204842	12	111890018	112037480	311	14	1.3704	0.085287	ATXN2
ENSG00000144481	2	234826043	234928166	414	46	1.3701	0.085323	TRPM8
ENSG00000170835	9	135937365	135947248	8	4	1.37	0.085341	CEL
ENSG00000138160	10	94353043	94415150	270	17	1.37	0.085341	KIF11
ENSG00000153292	6	46965440	47010099	131	23	1.37	0.085347	GPR110
ENSG00000066382	11	30406040	30608419	620	40	1.3695	0.085417	MPPED2
ENSG00000134352	5	55230923	55290821	167	22	1.3695	0.085421	IL6ST
ENSG00000142405	19	54296857	54327648	138	24	1.3693	0.08546	NLRP12
ENSG00000152684	5	52083774	52099880	47	10	1.3691	0.085487	PELO
ENSG00000151465	10	12237964	12292588	222	24	1.369	0.085496	CDC123
ENSG00000078140	4	39699664	39784412	281	17	1.3689	0.085519	UBE2K
ENSG00000172399	4	120056939	120108944	213	18	1.3685	0.085573	MYOZ2
ENSG00000163220	1	153330330	153333503	2	1	1.3682	0.085622	S100A9
ENSG00000256660	12	10163226	10171218	23	8	1.3669	0.085834	CLEC12B
ENSG00000100941	14	39644387	39652422	32	10	1.3668	0.085846	PNN
ENSG00000141750	17	37366789	37382125	56	17	1.3664	0.085899	STAC2
ENSG00000115163	2	26987157	27023935	126	16	1.3662	0.085943	CENPA
ENSG00000070831	1	22379120	22419437	106	15	1.3658	0.085999	CDC42
ENSG00000114279	3	191857184	192485553	2423	122	1.3651	0.086107	FGF12
ENSG00000184232	11	120081475	120101041	92	16	1.3643	0.08624	OAF
ENSG00000142484	17	4675179	4686506	45	11	1.3643	0.086242	TM4SF5
ENSG00000244411	11	71238313	71239210	2	1	1.3642	0.086247	KRTAP5-7
ENSG00000197756	2	217362912	217443903	294	41	1.3639	0.086305	RPL37A
ENSG00000211452	1	54356912	54376759	88	12	1.3638	0.086321	DIO1
ENSG00000236699	4	106473777	106629250	486	37	1.363	0.086449	ARHGEF38
ENSG00000101082	20	35240721	35274619	60	13	1.3625	0.086513	SLA2
ENSG00000166401	18	61637159	61672278	124	33	1.3621	0.086587	SERPINB8
ENSG00000163202	1	152551857	152552980	3	2	1.3617	0.086648	LCE3D
ENSG00000006747	7	12610203	12693228	363	42	1.3616	0.086659	SCIN
ENSG00000117480	1	46859937	46879520	39	9	1.3616	0.086663	FAAH
ENSG00000101400	20	31995761	32031698	61	10	1.3612	0.086729	SNTA1
ENSG00000198276	20	62571186	62587769	42	15	1.3612	0.08673	UCKL1
ENSG00000178163	4	10441498	10459034	49	11	1.36	0.086918	ZNF518B
ENSG00000197208	5	131630136	131679899	141	14	1.3599	0.086926	SLC22A4
ENSG00000136448	17	43128978	43186384	240	19	1.3599	0.086926	NMT1
ENSG00000168505	2	237073879	237077012	6	3	1.3594	0.087005	GBX2
ENSG00000135111	12	115108059	115121969	27	8	1.3594	0.087008	TBX3
ENSG00000184922	17	43298811	43324687	65	12	1.3588	0.087104	FMNL1
ENSG00000166069	15	38214140	38259925	110	15	1.3586	0.087142	TMCO5A
ENSG00000198121	9	113635543	113800981	569	33	1.358	0.08723	LPAR1
ENSG00000144369	2	187558698	187630685	164	25	1.3576	0.087301	FAM171B
ENSG00000175787	9	97021593	97063736	207	18	1.3575	0.087306	ZNF169
ENSG00000165097	6	18155560	18224084	327	35	1.3569	0.087412	KDM1B
ENSG00000135744	1	230838269	230850043	58	14	1.3565	0.087468	AGT
ENSG00000188770	1	203463271	203477992	63	12	1.3565	0.087478	OPTC
ENSG00000136487	17	61957578	61959295	3	2	1.3557	0.087598	GH2
ENSG00000113838	3	186263862	186288332	92	14	1.3556	0.087618	TBCCD1
ENSG00000178078	19	4324040	4342783	94	17	1.3554	0.087645	STAP2
ENSG00000100433	14	88649113	88793251	590	52	1.3547	0.087761	KCNK10
ENSG00000070985	11	2425745	2444275	85	13	1.3543	0.087814	TRPM5
ENSG00000215187	9	35561828	35563896	4	2	1.3542	0.087843	FAM166B
ENSG00000143515	1	154298029	154323783	55	8	1.354	0.08787	ATP8B2
ENSG00000101596	18	2655737	2805015	646	20	1.3526	0.088087	SMCHD1
ENSG00000164543	7	43622357	43666385	163	14	1.3526	0.088091	STK17A
ENSG00000150681	1	192127587	192154945	35	7	1.3523	0.088146	RGS18
ENSG00000177879	5	115177178	115249778	172	22	1.3522	0.088157	AP3S1
ENSG00000204246	9	107298030	107299137	4	2	1.3519	0.088205	OR13C3
ENSG00000188334	19	48471303	48495427	132	18	1.3519	0.088208	BSPH1
ENSG00000142507	17	4699439	4701790	10	5	1.3517	0.08823	PSMB6
ENSG00000163472	1	156252726	156262976	19	4	1.3517	0.08824	TMEM79
ENSG00000258792	14	90095265	90109015	30	6	1.3512	0.088322	RP11-944C7.1
ENSG00000111962	6	149068464	149398126	1244	98	1.3511	0.088326	UST
ENSG00000151726	4	185676749	185747972	270	26	1.351	0.088348	ACSL1
ENSG00000115825	2	37477645	37551951	359	23	1.3505	0.088436	PRKD3
ENSG00000144406	2	210636717	210864024	571	34	1.3504	0.088437	UNC80
ENSG00000187815	1	40942887	40962015	57	11	1.3502	0.088475	ZFP69
ENSG00000106635	7	72950686	72972332	33	4	1.3502	0.088483	BCL7B
ENSG00000213029	1	229440129	229441248	2	1	1.35	0.088501	SPHAR
ENSG00000154258	17	66970629	67057205	237	23	1.3499	0.088527	ABCA9
ENSG00000144867	3	133502877	133544616	119	25	1.349	0.088668	SRPRB
ENSG00000184992	12	125478246	125515777	243	21	1.3485	0.088747	BRI3BP
ENSG00000170298	17	20352708	20370852	6	2	1.3485	0.088747	LGALS9B
ENSG00000268351	11	69587254	69587718	1	1	1.3485	0.08875	AP001888.1
ENSG00000172020	3	115342171	115440337	327	54	1.348	0.088823	GAP43
ENSG00000080910	1	196788898	196928356	349	18	1.3479	0.088839	CFHR2
ENSG00000256223	12	133707161	133736051	91	10	1.3468	0.089019	ZNF10
ENSG00000170917	4	123809852	123844123	195	19	1.3468	0.089023	NUDT6
ENSG00000187821	4	185939995	185941958	7	3	1.3459	0.08916	HELT
ENSG00000118322	5	159990127	160279221	1004	56	1.3458	0.089178	ATP10B
ENSG00000167904	8	56608983	56685966	290	22	1.3456	0.089222	TMEM68
ENSG00000090470	15	65409717	65426174	12	4	1.3456	0.089222	PDCD7
ENSG00000109851	11	20177701	20182159	22	9	1.3455	0.089231	DBX1
ENSG00000002933	7	150497491	150502208	36	8	1.3452	0.089286	TMEM176A
ENSG00000007923	1	6694228	6761984	141	15	1.3449	0.089329	DNAJC11
ENSG00000117090	1	160577890	160617085	124	28	1.3445	0.08939	SLAMF1
ENSG00000089048	20	13694969	13765532	225	20	1.3442	0.089448	ESF1
ENSG00000185386	22	50702142	50709196	25	9	1.3439	0.089492	MAPK11
ENSG00000151348	11	44117099	44266979	356	23	1.3437	0.089529	EXT2
ENSG00000122068	3	197464050	197514467	153	20	1.3436	0.089544	FYTTD1
ENSG00000159377	1	151372010	151374420	4	2	1.3434	0.089579	PSMB4
ENSG00000160284	21	47581062	47604390	178	11	1.3433	0.089587	SPATC1L
ENSG00000047249	8	54628117	54756118	191	11	1.3428	0.089669	ATP6V1H
ENSG00000116667	1	184356192	184598154	618	37	1.3425	0.089717	C1orf21
ENSG00000134909	11	128834955	129149219	715	20	1.3422	0.08976	ARHGAP32
ENSG00000272162	6	10748027	10930656	585	54	1.3417	0.08984	RP11-637O19.3
ENSG00000272305	3	53003135	53133469	452	25	1.3413	0.089909	RP11-894J14.5
ENSG00000143033	1	93544792	93604638	118	14	1.3409	0.089971	MTF2
ENSG00000082212	18	48405419	48474691	198	15	1.3404	0.090057	ME2
ENSG00000197299	15	91260558	91358859	355	25	1.3397	0.090168	BLM
ENSG00000185347	14	105956192	105965912	36	11	1.3394	0.090216	C14orf80
ENSG00000161904	6	33738979	33756913	88	13	1.3394	0.090218	LEMD2
ENSG00000163157	1	151142462	151148760	4	2	1.3393	0.090236	TMOD4
ENSG00000132911	5	151771093	151812929	159	7	1.3385	0.090364	NMUR2
ENSG00000187990	6	26216428	26216872	2	1	1.3384	0.090376	HIST1H2BG
ENSG00000182481	17	66031635	66042958	39	6	1.3384	0.090376	KPNA2
ENSG00000100453	14	25100160	25103473	16	3	1.3379	0.090463	GZMB
ENSG00000163638	3	64501333	64673676	730	46	1.3378	0.090487	ADAMTS9
ENSG00000253787	5	67485704	67494235	33	10	1.3374	0.09054	RP11-404L6.2
ENSG00000139797	13	98828039	98829519	5	2	1.3371	0.090599	RNF113B
ENSG00000221947	8	71581600	71702606	459	13	1.3366	0.090681	XKR9
ENSG00000156990	3	9879533	9886286	18	7	1.3366	0.090684	RPUSD3
ENSG00000168071	11	64107695	64125006	52	11	1.3365	0.090689	CCDC88B
ENSG00000168917	3	136537489	136574734	107	5	1.3363	0.090718	SLC35G2
ENSG00000177479	3	48956254	49023815	69	11	1.3358	0.090803	ARIH2
ENSG00000171823	12	1675159	1703331	91	27	1.3353	0.090895	FBXL14
ENSG00000145649	5	54398476	54406080	12	3	1.3348	0.090963	GZMA
ENSG00000185963	9	95473645	95527094	135	10	1.3346	0.091	BICD2
ENSG00000128805	10	49654077	49864310	924	60	1.3346	0.091006	ARHGAP22
ENSG00000105248	19	4247076	4269087	122	11	1.3341	0.091077	CCDC94
ENSG00000150687	11	86502101	86663952	663	48	1.3339	0.091123	PRSS23
ENSG00000143494	1	213123862	213165379	173	35	1.3331	0.091243	VASH2
ENSG00000130713	9	133569108	133580248	18	8	1.333	0.091274	EXOSC2
ENSG00000082515	5	154320630	154348971	54	7	1.3328	0.0913	MRPL22
ENSG00000265096	17	77015291	77023737	28	6	1.3326	0.091325	C1QTNF1-AS1
ENSG00000121351	12	21507893	21532912	131	15	1.3321	0.091409	IAPP
ENSG00000120242	9	21409146	21410184	4	2	1.3317	0.09148	IFNA8
ENSG00000163814	3	45123770	45187914	244	61	1.3316	0.091497	CDCP1
ENSG00000185650	14	69254377	69263190	25	8	1.3315	0.091514	ZFP36L1
ENSG00000159788	4	3294755	3441640	583	41	1.331	0.091589	RGS12
ENSG00000126583	19	54382444	54410906	99	20	1.331	0.091595	PRKCG
ENSG00000182687	17	74070875	74073622	3	2	1.331	0.091599	GALR2
ENSG00000135925	2	219745085	219764303	29	8	1.3305	0.091669	WNT10A
ENSG00000247270	16	66516775	66519747	5	2	1.3302	0.091723	AC132186.1
ENSG00000160584	11	116714118	116969153	1069	27	1.3297	0.091815	SIK3
ENSG00000160932	8	144099399	144105249	14	4	1.3295	0.09184	LY6E
ENSG00000133083	13	36345478	36705443	1298	84	1.3292	0.091897	DCLK1
ENSG00000146872	17	60536019	60692842	215	18	1.3283	0.09204	TLK2
ENSG00000109255	4	56461396	56502865	155	20	1.3277	0.092138	NMU
ENSG00000168386	3	99548985	99833357	394	19	1.3277	0.092146	FILIP1L
ENSG00000004777	19	36265434	36279724	41	7	1.3272	0.092222	ARHGAP33
ENSG00000128039	4	56212276	56239263	100	19	1.3271	0.092237	SRD5A3
ENSG00000184574	12	6728001	6745613	31	12	1.3265	0.092333	LPAR5
ENSG00000187049	11	61159159	61166335	12	4	1.3264	0.092358	TMEM216
ENSG00000136643	1	213224589	213448116	454	26	1.326	0.092426	RPS6KC1
ENSG00000124570	6	2948393	2972090	100	13	1.3257	0.092471	SERPINB6
ENSG00000173976	19	3769087	3772233	15	5	1.3255	0.0925	RAX2
ENSG00000169242	1	155099936	155107333	13	4	1.3255	0.092509	EFNA1
ENSG00000258643	14	23776044	23794578	37	11	1.3246	0.092653	BCL2L2-PABPN1
ENSG00000127419	4	926175	952444	68	16	1.3246	0.09266	TMEM175
ENSG00000187166	12	48722763	48724062	7	3	1.3245	0.092662	H1FNT
ENSG00000185742	11	109292846	109299840	3	1	1.3243	0.092701	C11orf87
ENSG00000167657	19	3958451	3971121	29	6	1.3232	0.092884	DAPK3
ENSG00000197428	11	4660945	4662068	4	1	1.3232	0.092892	OR51D1
ENSG00000168787	6	29364416	29365448	12	3	1.3229	0.092926	OR12D2
ENSG00000133742	8	86239837	86291243	100	19	1.323	0.092926	CA1
ENSG00000041357	15	78832747	78841604	42	6	1.3227	0.092961	PSMA4
ENSG00000198150	17	8261731	8263538	1	1	1.3222	0.09305	AC135178.1
ENSG00000172037	3	49158547	49170551	8	4	1.322	0.093077	LAMB2
ENSG00000244038	1	20978270	20988000	37	9	1.322	0.09308	DDOST
ENSG00000108010	10	131934663	131982785	233	18	1.3219	0.093105	GLRX3
ENSG00000011009	1	24117460	24122029	4	2	1.3218	0.093112	LYPLA2
ENSG00000063438	5	304291	438406	558	34	1.3218	0.093118	AHRR
ENSG00000105289	19	3708107	3750811	155	27	1.3212	0.093216	TJP3
ENSG00000196757	19	12035883	12061588	89	13	1.3207	0.093304	ZNF700
ENSG00000183161	11	22644079	22647387	5	3	1.3198	0.093446	FANCF
ENSG00000121381	12	10961693	10962767	1	1	1.3192	0.09355	TAS2R9
ENSG00000197054	19	12035890	12091196	240	14	1.3184	0.093691	ZNF763
ENSG00000129932	19	3490819	3500938	54	7	1.3183	0.093697	DOHH
ENSG00000069275	1	205681947	205719404	82	16	1.3183	0.09371	NUCKS1
ENSG00000215853	1	152126071	152131704	9	5	1.3182	0.093712	RPTN
ENSG00000141179	17	53828340	53920191	387	19	1.318	0.093748	PCTP
ENSG00000174721	10	93666346	93669240	9	4	1.3177	0.093809	FGFBP3
ENSG00000167749	19	51409608	51413994	20	8	1.3173	0.093864	KLK4
ENSG00000184220	3	99536678	99897447	484	20	1.3165	0.094003	CMSS1
ENSG00000179869	7	48211055	48687092	2117	64	1.3157	0.094139	ABCA13
ENSG00000091640	17	4862521	4871167	24	9	1.3157	0.094143	SPAG7
ENSG00000159873	22	29168662	29185283	59	11	1.3153	0.094198	CCDC117
[truncated: 16,819 more rows]
