# Supplementary material for: Novel risk loci for COVID-19 hospitalization among admixed American populations
Source: eLife. 2024 Oct 3;13:RP93666. doi: 10.7554/eLife.93666 (PMC11449485; doi:10.7554/eLife.93666)
Supplement: Supplementary file 5. — HUGO: HGNC gene symbol; pLI: pLI score from ExAC database, probability of being intolerant to loss of function (higher the score, higher the intolerance); ncRVIS: non-coding residual variation intolerance score (higher the score, higher intolerance to non-coding variation); posMapSNPs: number of SNPs mapped by positional mapping; posMapMaxCADD: the maximum CADD score of mapped SNPs by positional mapping; eqtlMapSNPS: the number of SNPs mapped to the genes based on eQTL mapping; eqtlMapminP: the minimum eQTL p-value of mapped SNPs; eqtlMapminQ: the minimum eQTL FDR of mapped SNPs; eqtlMapts: tissue of mapped eQTLs; eqtlDirection: consequential direction of mapped eQTL SNPs after aligning the risk alleles; minGwasP: minimum GWAS p-value of mapped eQTLs; IndSigSNPs: independent SNPs that are in LD with the mapped SNPs. [file elife-93666-supp5.xlsx]

## Sheet: Supplementary Table 5.
Supplementary Table 5. Prioritized genes by eQTL and positional mapping by FUMA in the SC-HGI_AMR GWAS meta-analysis results (hg37). HUGO: HGNC gene symbol; pLI: pLI score from ExAC database, probability of being intolerant to loss of function (higher the score, higher the intolerance); ncRVIS: non-coding residual variation intolerance score (higher the score, higher intolerance to non-coding var…
ensg	symbol	CHR	start	end	strand	type	entrezID	HUGO	pLI	ncRVIS	posMapSNPs	posMapMaxCADD	eqtlMapSNPs	eqtlMapminP	eqtlMapminQ	eqtlMapts	eqtlDirection	minGwasP	IndSigSNPs
ENSG00000196151	WDSUB1	2	160092304	160143310	-1	protein_coding	151525	WDSUB1	1.37628e-06	NA	0	0	37	1.02903e-07	1.97398e-14	GTEx/v8/Whole_Blood	+	1.396e-07	rs13003835
ENSG00000123636	BAZ2B	2	160175490	160473203	-1	protein_coding	29994	BAZ2B	0.999921	-0.650522	45	16.54	3	1.22582e-06	4.03479e-32	GTEx/v8/Whole_Blood	-	3.657e-08	rs13003835
ENSG00000223642	AC008277.1	2	160242878	160261147	1	antisense	NA	NA	NA	NA	30	16.54	0	NA	NA	NA	NA	3.657e-08	rs13003835
ENSG00000224152	AC009506.1	2	160471807	160473593	1	antisense	NA	NA	NA	NA	0	0	26	8.23673e-08	4.80894e-14	GTEx/v8/Whole_Blood	-	3.657e-08	rs13003835
ENSG00000054219	LY75	2	160628362	160761260	-1	protein_coding	4065	LY75	3.63213e-27	NA	0	0	35	3.46181e-07	3.82017e-87	GTEx/v8/Whole_Blood:GTEx/v8/Esophagus_Mucosa:GTEx/v8/Lung	-	3.657e-08	rs13003835
ENSG00000153246	PLA2R1	2	160788519	160919121	-1	protein_coding	22925	PLA2R1	5.17711e-15	0.994909	0	0	7	1.71762e-05	4.61258e-36	GTEx/v8/Esophagus_Mucosa	-	1.396e-07	rs13003835
ENSG00000163817	SLC6A20	3	45796942	45838027	-1	protein_coding	54716	SLC6A20	6.44898e-10	0.251559	8	4.173	0	NA	NA	NA	NA	8.087e-17	rs35731912;rs17078346
ENSG00000163818	LZTFL1	3	45864808	45957534	-1	protein_coding	54585	LZTFL1	0.194103	-1.16298	42	13.68	0	NA	NA	NA	NA	6.926e-17	rs35731912;rs17078346;rs34901975;rs12639224;rs7653372
ENSG00000236930	RP11-852E15.1	3	45925132	45925605	-1	pseudogene	NA	NA	NA	NA	10	6.254	0	NA	NA	NA	NA	3.067e-12	rs12639224;rs34901975;rs7653372
ENSG00000173585	CCR9	3	45927996	45944667	1	protein_coding	10803	CCR9	0.00464031	-0.458428	14	8.293	18	0.000138734	0.00822783	GTEx/v8/Whole_Blood	+	1.45e-16	rs34901975;rs7653372;rs35731912
ENSG00000201635	Y_RNA	3	45944679	45944790	1	misc_RNA	NA	NA	NA	NA	7	8.293	0	NA	NA	NA	NA	1.152e-11	rs7653372;rs34901975
ENSG00000163820	FYCO1	3	45959396	46037316	-1	protein_coding	79443	FYCO1	9.66913e-13	1.65562	69	14.93	147	1.799e-05	1.55485e-13	GTEx/v8/Esophagus_Mucosa	+	3.067e-12	rs34901975;rs6785091;rs35731912;rs7653372
ENSG00000172215	CXCR6	3	45982425	45989845	1	protein_coding	10663	CXCR6	6.1512e-05	-0.166606	19	11.81	9	5.96297e-05	0.0243627	GTEx/v8/Lung	-	2.481e-10	rs34901975;rs6785091
ENSG00000173578	XCR1	3	46058516	46069234	-1	protein_coding	2829	XCR1	0.0978542	-0.145183	54	11.83	0	NA	NA	NA	NA	4.231e-09	rs34901975;rs6785091;rs7653372
ENSG00000226933	NRBF2P2	3	46064788	46065648	1	pseudogene	100114903	NRBF2P2	NA	NA	41	11.83	0	NA	NA	NA	NA	4.231e-09	rs6785091;rs34901975
ENSG00000229515	FLT1P1	3	46183850	46185169	-1	pseudogene	391533	FLT1P1	NA	NA	9	3.954	197	1.76153e-11	1.00809e-11	GTEx/v8/Whole_Blood	-	3.067e-12	rs34901975;rs7653372;rs6785091;rs35731912
ENSG00000183625	CCR3	3	46205096	46308197	1	protein_coding	1232	CCR3	0.0318931	-0.541029	6	3.864	52	7.32867e-07	1.55584e-30	GTEx/v8/Whole_Blood	-	4.231e-09	rs34901975;rs7653372;rs6785091
ENSG00000163823	CCR1	3	46243200	46249887	-1	protein_coding	1230	CCR1	0.891829	1.8919	4	3.864	176	1.39622e-10	1.25074e-08	GTEx/v8/Esophagus_Mucosa	+	6.926e-17	rs34901975;rs35731912;rs17078346;rs12639224;rs6785091
ENSG00000160791	CCR5	3	46411633	46417697	1	protein_coding	1234	CCR5	3.51209e-08	1.48149	0	0	8	2.16398e-05	0.0058577	GTEx/v8/Lung	-	1.96e-06	rs6785091;rs34901975
ENSG00000234753	RP11-328M4.2	6	41462591	41516359	-1	antisense	101060264	FOXP4-AS1	NA	NA	4	10.41	0	NA	NA	NA	NA	1.893e-08	rs2477820
ENSG00000137166	FOXP4	6	41514164	41570122	1	protein_coding	116113	FOXP4	0.671771	-0.436538	1	4.186	0	NA	NA	NA	NA	2.074e-07	rs2477820
ENSG00000137509	PRCP	11	82534544	82681626	-1	protein_coding	5547	PRCP	3.33653e-08	0.0662213	6	14.21	0	NA	NA	NA	NA	2.259e-08	rs77599934
ENSG00000254441	RP11-718B12.5	11	82546551	82548264	1	pseudogene	NA	NA	NA	NA	1	4.826	0	NA	NA	NA	NA	NA	rs77599934
ENSG00000238995	snoU13	11	82554927	82555027	1	snoRNA	NA	NA	NA	NA	1	4.826	0	NA	NA	NA	NA	NA	rs77599934
ENSG00000165490	C11orf82	11	82611017	82669319	1	protein_coding	220042	C11orf82	5.2589e-13	0.416444	3	14.21	0	NA	NA	NA	NA	2.259e-08	rs77599934
ENSG00000254698	RP11-659G9.3	11	82674723	82750157	-1	sense_overlapping	NA	NA	NA	NA	4	3.338	0	NA	NA	NA	NA	NA	rs77599934
ENSG00000137502	RAB30	11	82684175	82782965	-1	protein_coding	27314	RAB30	0.959124	-0.177824	5	4.369	0	NA	NA	NA	NA	NA	rs77599934
ENSG00000246067	RAB30-AS1	11	82783108	82817761	1	lincRNA	100506233	RAB30-AS1	NA	NA	2	0.973	0	NA	NA	NA	NA	NA	rs77599934
ENSG00000255503	RP11-113K21.4	11	82783444	82808238	-1	lincRNA	NA	NA	NA	NA	2	0.973	0	NA	NA	NA	NA	NA	rs77599934
ENSG00000255010	RP11-113K21.3	11	82817622	82818003	-1	pseudogene	NA	NA	NA	NA	1	0.973	0	NA	NA	NA	NA	NA	rs77599934
ENSG00000254965	RP11-113K21.2	11	82822102	82822484	-1	pseudogene	NA	NA	NA	NA	1	0.973	0	NA	NA	NA	NA	NA	rs77599934
