# Supplementary material for: Novel risk loci for COVID-19 hospitalization among admixed American populations
Source: eLife. 2024 Oct 3;13:RP93666. doi: 10.7554/eLife.93666 (PMC11449485; doi:10.7554/eLife.93666)
Supplement: Supplementary file 6. [file elife-93666-supp6.xlsx]

## Sheet: Supplementary Table 6.
Supplementary Table 6. Fine-mapped credible set derived with corrcoverage (95%) for the associated region in chromosome 2 (BAZ2B).
CHR	POS	SNP	EA	NEA	EAF_avg	FreqSE	MinFreq	MaxFreq	beta_meta	SE_meta	pval_meta	direction	HetISq	HetChiSq	HetDf	HetPval
2	159351605	2:159351605:C:T	t	c	0.2722	0.0211	0.2288	0.2824	-0.1775	0.0377	2.431e-06	--	0	0.086	1	0.7698
2	159360268	2:159360268:A:C	a	c	0.7231	0.0208	0.7131	0.7662	0.1909	0.0372	2.751e-07	++	0	0.655	1	0.4183
2	159360569	2:159360569:C:CACTG	cactg	c	0.3035	0.0183	0.2706	0.3137	-0.2005	0.0394	3.649e-07	--	0	0.109	1	0.7413
2	159362240	2:159362240:C:A	a	c	0.5728	0.0203	0.532	0.5829	-0.1585	0.0331	1.696e-06	--	0	0.719	1	0.3965
2	159363825	2:159363825:A:G	a	g	0.4199	0.0187	0.4107	0.458	0.1564	0.0331	2.342e-06	++	0	0.345	1	0.5569
2	159364287	2:159364287:A:G	a	g	0.4193	0.019	0.41	0.458	0.1561	0.0331	2.391e-06	++	0	0.35	1	0.5541
2	159365291	2:159365291:T:C	t	c	0.4141	0.0215	0.4036	0.458	0.1552	0.033	2.509e-06	++	0	0.364	1	0.546
2	159365728	2:159365728:A:G	a	g	0.4194	0.0191	0.41	0.4581	0.1554	0.0331	2.662e-06	++	0	0.339	1	0.5606
2	159366391	2:159366391:A:T	a	t	0.4291	0.0139	0.4223	0.4574	0.1569	0.0331	2.142e-06	++	0	0.423	1	0.5152
2	159366873	2:159366873:G:C	c	g	0.5701	0.0139	0.5419	0.5769	-0.157	0.0331	2.098e-06	--	0	0.464	1	0.496
2	159367657	2:159367657:A:G	a	g	0.4052	0.0177	0.3965	0.4412	0.1659	0.0333	6.17e-07	++	0	0.055	1	0.815
2	159368776	2:159368776:T:C	t	c	0.408	0.0185	0.3989	0.4458	0.1685	0.0332	3.876e-07	++	0	0.075	1	0.7846
2	159371464	2:159371464:A:T	a	t	0.4186	0.0133	0.4121	0.4458	0.1678	0.0332	4.332e-07	++	0	0.081	1	0.7764
2	159376456	2:159376456:G:A	a	g	0.601	0.0205	0.5591	0.611	-0.1669	0.0331	4.738e-07	--	0	0.066	1	0.7972
2	159376946	2:159376946:A:C	a	c	0.7203	0.0205	0.7105	0.7631	0.1835	0.0368	6.072e-07	++	0	0.562	1	0.4534
2	159379240	2:159379240:A:G	a	g	0.4039	0.0181	0.395	0.4409	0.1677	0.0332	4.536e-07	++	0	0.051	1	0.8205
2	159379487	2:159379487:C:T	t	c	0.5477	0.0245	0.4987	0.56	-0.153	0.0329	3.225e-06	--	0	0.304	1	0.5814
2	159379656	2:159379656:G:C	c	g	0.5594	0.0185	0.5224	0.5687	-0.1624	0.0331	9.045e-07	--	0	0.008	1	0.9275
2	159382217	2:159382217:C:T	t	c	0.2752	0.021	0.2311	0.2852	-0.1825	0.0369	7.395e-07	--	0	0.578	1	0.447
2	159382867	2:159382867:A:G	a	g	0.7205	0.0204	0.7107	0.7631	0.1814	0.0367	7.738e-07	++	0	0.603	1	0.4374
2	159384181	2:159384181:A:G	a	g	0.4034	0.0184	0.3944	0.4409	0.168	0.0332	4.329e-07	++	0	0.075	1	0.7841
2	159385913	2:159385913:A:G	a	g	0.3958	0.021	0.3856	0.4391	0.1613	0.0333	1.241e-06	++	0	0.017	1	0.8967
2	159386105	2:159386105:A:T	a	t	0.4686	0.0182	0.4597	0.5057	0.172	0.0325	1.191e-07	++	0	0.163	1	0.6868
2	159386672	2:159386672:T:A	a	t	0.5637	0.0175	0.5286	0.5724	-0.1667	0.0331	4.676e-07	--	0	0.036	1	0.8494
2	159386673	2:159386673:A:T	a	t	0.4363	0.0175	0.4276	0.4714	0.1667	0.0331	4.67e-07	++	0	0.036	1	0.8495
2	159387215	2:159387215:A:G	a	g	0.4266	0.0223	0.4155	0.4714	0.1654	0.0331	5.722e-07	++	0	0.046	1	0.8301
2	159387283	2:159387283:T:C	t	c	0.4277	0.0221	0.4167	0.472	0.1647	0.0331	6.459e-07	++	0	0.021	1	0.8852
2	159387569	2:159387569:T:C	t	c	0.429	0.0214	0.4183	0.472	0.1637	0.0331	7.484e-07	++	0	0.025	1	0.8738
2	159387694	2:159387694:G:A	a	g	0.5723	0.022	0.528	0.5833	-0.1646	0.0331	6.525e-07	--	0	0.021	1	0.8843
2	159388577	2:159388577:T:A	a	t	0.5629	0.0173	0.528	0.5715	-0.1643	0.0331	6.783e-07	--	0	0.022	1	0.8813
2	159391779	2:159391779:GAT:G	g	gat	0.4578	0.0081	0.4534	0.4725	-0.1788	0.0353	4.106e-07	--	0	0.056	1	0.8136
2	159392137	2:159392137:A:G	a	g	0.4243	0.0211	0.4138	0.4667	0.1556	0.0331	2.507e-06	++	0	0.001	1	0.9805
2	159392606	2:159392606:C:G	c	g	0.7244	0.0208	0.7145	0.7682	0.1858	0.0367	4.297e-07	++	0	0.753	1	0.3857
2	159393260	2:159393260:T:C	t	c	0.4895	0.0259	0.4768	0.5424	0.1696	0.0322	1.396e-07	++	0	0.493	1	0.4826
2	159393627	2:159393627:TC:T	t	tc	0.4601	0.0026	0.4554	0.4615	-0.1721	0.0353	1.058e-06	--	0	0.232	1	0.6301
2	159393629	2:159393629:T:A	a	t	0.5031	0.0248	0.4553	0.5159	-0.1671	0.0338	7.43e-07	--	0	0.298	1	0.5852
2	159396057	2:159396057:A:G	a	g	0.7207	0.0203	0.711	0.7632	0.1834	0.0366	5.454e-07	++	0	0.714	1	0.3983
2	159398147	2:159398147:G:A	a	g	0.3748	0.0177	0.3662	0.4113	0.1592	0.0339	2.65e-06	++	0	0.119	1	0.7305
2	159399171	2:159399171:A:C	a	c	0.7206	0.0203	0.7109	0.7631	0.1853	0.0366	4.203e-07	++	0	0.675	1	0.4113
2	159399817	2:159399817:A:G	a	g	0.7203	0.0203	0.7106	0.7627	0.1874	0.0366	3.114e-07	++	0	0.633	1	0.4263
2	159401859	2:159401859:C:T	t	c	0.5187	0.0212	0.4754	0.5291	-0.1544	0.0324	1.862e-06	--	0	0.389	1	0.5326
2	159406182	2:159406182:C:T	t	c	0.5189	0.0209	0.4759	0.5291	-0.1537	0.0323	1.985e-06	--	0	0.411	1	0.5214
2	159407982	2:159407982:T:C	t	c	0.4703	0.0192	0.4609	0.5097	0.1789	0.0325	3.657e-08	++	0	0.609	1	0.4353
2	159408209	2:159408209:T:G	t	g	0.7219	0.0182	0.7132	0.76	0.1746	0.0366	1.863e-06	++	12.3	1.14	1	0.2855
2	159409009	2:159409009:G:A	a	g	0.5371	0.0181	0.5	0.5459	-0.1642	0.0325	4.3e-07	--	0	0.128	1	0.7209
2	159411581	2:159411581:T:C	t	c	0.7268	0.0192	0.7176	0.7669	0.1756	0.0368	1.828e-06	++	35.9	1.561	1	0.2116
2	159411882	2:159411882:A:G	a	g	0.4625	0.0181	0.4535	0.4989	0.1648	0.0329	5.455e-07	++	0	0.147	1	0.7009
2	159412797	2:159412797:T:C	t	c	0.4703	0.0189	0.4611	0.509	0.1784	0.0325	3.979e-08	++	0	0.622	1	0.4302
2	159413336	2:159413336:C:A	a	c	0.538	0.0177	0.5024	0.5468	-0.1685	0.0329	3.05e-07	--	0	0.257	1	0.6123
2	159413622	2:159413622:T:G	t	g	0.5193	0.0223	0.5084	0.5652	0.1687	0.0324	1.912e-07	++	44	1.786	1	0.1814
2	159414347	2:159414347:C:A	a	c	0.4304	0.0153	0.4229	0.4618	0.1619	0.033	9.236e-07	++	0	0.548	1	0.4591
2	159415239	2:159415239:G:T	t	g	0.4592	0.0203	0.4492	0.5001	0.1792	0.0329	4.928e-08	++	16.7	1.201	1	0.2732
2	159417333	2:159417333:G:A	a	g	0.2787	0.0173	0.242	0.2869	-0.1746	0.036	1.233e-06	--	18.6	1.228	1	0.2678
2	159418933	2:159418933:T:A	a	t	0.2786	0.0174	0.2419	0.2868	-0.1759	0.036	1.051e-06	--	16.5	1.197	1	0.2739
2	159418935	2:159418935:G:C	c	g	0.2786	0.0174	0.2419	0.2868	-0.1759	0.036	1.051e-06	--	16.5	1.197	1	0.2739
2	159421836	2:159421836:A:T	a	t	0.7264	0.019	0.7173	0.7662	0.1753	0.0367	1.787e-06	++	32.3	1.478	1	0.2241
2	159422919	2:159422919:T:C	t	c	0.7217	0.0179	0.7133	0.7598	0.1707	0.036	2.066e-06	++	24.4	1.323	1	0.25
2	159423607	2:159423607:T:C	t	c	0.7217	0.0179	0.7133	0.7598	0.1709	0.036	1.997e-06	++	24	1.316	1	0.2513
2	159423792	2:159423792:C:T	t	c	0.278	0.018	0.2402	0.2866	-0.1738	0.0365	1.946e-06	--	19.4	1.24	1	0.2654
2	159423807	2:159423807:C:T	t	c	0.2796	0.0184	0.2402	0.2882	-0.1715	0.0359	1.774e-06	--	22.9	1.297	1	0.2547
2	159424472	2:159424472:T:C	t	c	0.7203	0.0184	0.7117	0.7597	0.1678	0.036	3.074e-06	++	22.6	1.292	1	0.2557
2	159424835	2:159424835:A:C	a	c	0.7216	0.0179	0.7132	0.7597	0.1684	0.036	2.835e-06	++	21.6	1.276	1	0.2586
2	159425695	2:159425695:C:T	t	c	0.2784	0.0179	0.2402	0.2868	-0.1681	0.036	2.933e-06	--	21.8	1.279	1	0.2581
2	159425829	2:159425829:G:T	t	g	0.2784	0.0179	0.2403	0.2868	-0.1684	0.036	2.835e-06	--	21.6	1.276	1	0.2586
2	159428549	2:159428549:C:T	t	c	0.2782	0.0178	0.2403	0.2865	-0.1676	0.036	3.172e-06	--	13.8	1.16	1	0.2814
2	159430008	2:159430008:T:G	t	g	0.7215	0.0179	0.7131	0.7597	0.1667	0.036	3.57e-06	++	15.5	1.184	1	0.2765
2	159430565	2:159430565:A:T	a	t	0.7219	0.0179	0.7135	0.76	0.1676	0.036	3.14e-06	++	9.5	1.105	1	0.2931
2	159431771	2:159431771:C:G	c	g	0.7219	0.0181	0.7134	0.7604	0.1684	0.036	2.848e-06	++	10.8	1.122	1	0.2896
2	159435409	2:159435409:G:A	a	g	0.2777	0.0184	0.2393	0.2865	-0.1699	0.0366	3.365e-06	--	0	0.915	1	0.3389
2	159435453	2:159435453:T:C	t	c	0.7222	0.0184	0.7134	0.7607	0.1702	0.0365	3.176e-06	++	0	0.906	1	0.3413
2	159436422	2:159436422:C:T	t	c	0.2767	0.018	0.2392	0.2853	-0.1701	0.0366	3.286e-06	--	0	0.905	1	0.3414
2	159436667	2:159436667:C:T	t	c	0.2773	0.0184	0.2389	0.2861	-0.1737	0.0366	2.031e-06	--	0	0.882	1	0.3478
2	159440061	2:159440061:C:T	t	c	0.2773	0.0184	0.2388	0.2861	-0.1716	0.0366	2.713e-06	--	0	0.963	1	0.3265
2	159440134	2:159440134:C:T	t	c	0.2773	0.0184	0.2388	0.2861	-0.1716	0.0366	2.713e-06	--	0	0.963	1	0.3265
2	159441612	2:159441612:T:C	t	c	0.7182	0.0183	0.7096	0.757	0.1669	0.0359	3.361e-06	++	0	0.918	1	0.3379
2	159447700	2:159447700:T:C	t	c	0.7229	0.0183	0.7141	0.7611	0.1696	0.0366	3.605e-06	++	6.4	1.068	1	0.3014
