# Supplementary material for: Novel risk loci for COVID-19 hospitalization among admixed American populations
Source: eLife. 2024 Oct 3;13:RP93666. doi: 10.7554/eLife.93666 (PMC11449485; doi:10.7554/eLife.93666)
Supplement: Supplementary file 7. [file elife-93666-supp7.xlsx]

## Sheet: Supplementary Table 7.
Supplementary Table 7. VEP annotations for the variants included in the fine-mapped credible sets for the novel associated loci in chromosome 2 (hg38).
#Uploaded_variation	Location	Allele	Consequence	IMPACT	SYMBOL	Gene	Feature_type	Feature	BIOTYPE
2_159360268_C/A	2:159360268-159360268	A	intron_variant	MODIFIER	BAZ2B	ENSG00000123636	Transcript	ENST00000392782.5	protein_coding
2_159360268_C/A	2:159360268-159360268	A	intron_variant	MODIFIER	BAZ2B	ENSG00000123636	Transcript	ENST00000392783.7	protein_coding
2_159360570_-/ACTG	2:159360569-159360569	ACTG	intron_variant	MODIFIER	BAZ2B	ENSG00000123636	Transcript	ENST00000392782.5	protein_coding
2_159360570_-/ACTG	2:159360569-159360569	ACTG	intron_variant	MODIFIER	BAZ2B	ENSG00000123636	Transcript	ENST00000392783.7	protein_coding
2_159362240_C/A	2:159362240-159362240	A	intron_variant	MODIFIER	BAZ2B	ENSG00000123636	Transcript	ENST00000392782.5	protein_coding
2_159362240_C/A	2:159362240-159362240	A	intron_variant	MODIFIER	BAZ2B	ENSG00000123636	Transcript	ENST00000392783.7	protein_coding
2_159362240_C/A	2:159362240-159362240	A	regulatory_region_variant	MODIFIER	-	-	RegulatoryFeature	ENSR00001039708	enhancer
2_159363825_G/A	2:159363825-159363825	A	intron_variant	MODIFIER	BAZ2B	ENSG00000123636	Transcript	ENST00000392782.5	protein_coding
2_159363825_G/A	2:159363825-159363825	A	intron_variant	MODIFIER	BAZ2B	ENSG00000123636	Transcript	ENST00000392783.7	protein_coding
2_159363825_G/A	2:159363825-159363825	A	regulatory_region_variant	MODIFIER	-	-	RegulatoryFeature	ENSR00001039708	enhancer
2_159364287_G/A	2:159364287-159364287	A	intron_variant	MODIFIER	BAZ2B	ENSG00000123636	Transcript	ENST00000392782.5	protein_coding
2_159364287_G/A	2:159364287-159364287	A	intron_variant	MODIFIER	BAZ2B	ENSG00000123636	Transcript	ENST00000392783.7	protein_coding
2_159364287_G/A	2:159364287-159364287	A	regulatory_region_variant	MODIFIER	-	-	RegulatoryFeature	ENSR00001039708	enhancer
2_159365291_C/T	2:159365291-159365291	T	intron_variant	MODIFIER	BAZ2B	ENSG00000123636	Transcript	ENST00000392782.5	protein_coding
2_159365291_C/T	2:159365291-159365291	T	intron_variant	MODIFIER	BAZ2B	ENSG00000123636	Transcript	ENST00000392783.7	protein_coding
2_159365291_C/T	2:159365291-159365291	T	regulatory_region_variant	MODIFIER	-	-	RegulatoryFeature	ENSR00001039708	enhancer
2_159365728_G/A	2:159365728-159365728	A	intron_variant	MODIFIER	BAZ2B	ENSG00000123636	Transcript	ENST00000392782.5	protein_coding
2_159365728_G/A	2:159365728-159365728	A	intron_variant	MODIFIER	BAZ2B	ENSG00000123636	Transcript	ENST00000392783.7	protein_coding
2_159366391_T/A	2:159366391-159366391	A	intron_variant	MODIFIER	BAZ2B	ENSG00000123636	Transcript	ENST00000392782.5	protein_coding
2_159366391_T/A	2:159366391-159366391	A	intron_variant	MODIFIER	BAZ2B	ENSG00000123636	Transcript	ENST00000392783.7	protein_coding
2_159366873_G/C	2:159366873-159366873	C	intron_variant	MODIFIER	BAZ2B	ENSG00000123636	Transcript	ENST00000392782.5	protein_coding
2_159366873_G/C	2:159366873-159366873	C	intron_variant	MODIFIER	BAZ2B	ENSG00000123636	Transcript	ENST00000392783.7	protein_coding
2_159367657_G/A	2:159367657-159367657	A	intron_variant	MODIFIER	BAZ2B	ENSG00000123636	Transcript	ENST00000392782.5	protein_coding
2_159367657_G/A	2:159367657-159367657	A	intron_variant	MODIFIER	BAZ2B	ENSG00000123636	Transcript	ENST00000392783.7	protein_coding
2_159367760_C/T	2:159367760-159367760	T	intron_variant	MODIFIER	BAZ2B	ENSG00000123636	Transcript	ENST00000392782.5	protein_coding
2_159367760_C/T	2:159367760-159367760	T	intron_variant	MODIFIER	BAZ2B	ENSG00000123636	Transcript	ENST00000392783.7	protein_coding
2_159368776_C/T	2:159368776-159368776	T	intron_variant	MODIFIER	BAZ2B	ENSG00000123636	Transcript	ENST00000392782.5	protein_coding
2_159368776_C/T	2:159368776-159368776	T	intron_variant	MODIFIER	BAZ2B	ENSG00000123636	Transcript	ENST00000392783.7	protein_coding
2_159371464_T/A	2:159371464-159371464	A	intron_variant	MODIFIER	BAZ2B	ENSG00000123636	Transcript	ENST00000392782.5	protein_coding
2_159371464_T/A	2:159371464-159371464	A	intron_variant	MODIFIER	BAZ2B	ENSG00000123636	Transcript	ENST00000392783.7	protein_coding
2_159373627_C/T	2:159373627-159373627	T	intron_variant	MODIFIER	BAZ2B	ENSG00000123636	Transcript	ENST00000392782.5	protein_coding
2_159373627_C/T	2:159373627-159373627	T	intron_variant	MODIFIER	BAZ2B	ENSG00000123636	Transcript	ENST00000392783.7	protein_coding
2_159376456_G/A	2:159376456-159376456	A	intron_variant	MODIFIER	BAZ2B	ENSG00000123636	Transcript	ENST00000392782.5	protein_coding
2_159376456_G/A	2:159376456-159376456	A	intron_variant	MODIFIER	BAZ2B	ENSG00000123636	Transcript	ENST00000392783.7	protein_coding
2_159376946_C/A	2:159376946-159376946	A	intron_variant	MODIFIER	BAZ2B	ENSG00000123636	Transcript	ENST00000392782.5	protein_coding
2_159376946_C/A	2:159376946-159376946	A	intron_variant	MODIFIER	BAZ2B	ENSG00000123636	Transcript	ENST00000392783.7	protein_coding
2_159379240_G/A	2:159379240-159379240	A	intron_variant	MODIFIER	BAZ2B	ENSG00000123636	Transcript	ENST00000392782.5	protein_coding
2_159379240_G/A	2:159379240-159379240	A	intron_variant	MODIFIER	BAZ2B	ENSG00000123636	Transcript	ENST00000392783.7	protein_coding
2_159379487_C/T	2:159379487-159379487	T	intron_variant	MODIFIER	BAZ2B	ENSG00000123636	Transcript	ENST00000392782.5	protein_coding
2_159379487_C/T	2:159379487-159379487	T	intron_variant	MODIFIER	BAZ2B	ENSG00000123636	Transcript	ENST00000392783.7	protein_coding
2_159379656_G/C	2:159379656-159379656	C	intron_variant	MODIFIER	BAZ2B	ENSG00000123636	Transcript	ENST00000392782.5	protein_coding
2_159379656_G/C	2:159379656-159379656	C	intron_variant	MODIFIER	BAZ2B	ENSG00000123636	Transcript	ENST00000392783.7	protein_coding
2_159382217_C/T	2:159382217-159382217	T	downstream_gene_variant	MODIFIER	BAZ2B	ENSG00000123636	Transcript	ENST00000294905.4	protein_coding
2_159382217_C/T	2:159382217-159382217	T	intron_variant	MODIFIER	BAZ2B	ENSG00000123636	Transcript	ENST00000392782.5	protein_coding
2_159382217_C/T	2:159382217-159382217	T	intron_variant	MODIFIER	BAZ2B	ENSG00000123636	Transcript	ENST00000392783.7	protein_coding
2_159382217_C/T	2:159382217-159382217	T	upstream_gene_variant	MODIFIER	-	ENSG00000223642	Transcript	ENST00000420020.5	lncRNA
2_159382217_C/T	2:159382217-159382217	T	downstream_gene_variant	MODIFIER	BAZ2B	ENSG00000123636	Transcript	ENST00000485917.1	protein_coding_CDS_not_defined
2_159382217_C/T	2:159382217-159382217	T	downstream_gene_variant	MODIFIER	BAZ2B	ENSG00000123636	Transcript	ENST00000551504.5	protein_coding_CDS_not_defined
2_159382867_G/A	2:159382867-159382867	A	downstream_gene_variant	MODIFIER	BAZ2B	ENSG00000123636	Transcript	ENST00000294905.4	protein_coding
2_159382867_G/A	2:159382867-159382867	A	intron_variant	MODIFIER	BAZ2B	ENSG00000123636	Transcript	ENST00000392782.5	protein_coding
2_159382867_G/A	2:159382867-159382867	A	intron_variant	MODIFIER	BAZ2B	ENSG00000123636	Transcript	ENST00000392783.7	protein_coding
2_159382867_G/A	2:159382867-159382867	A	upstream_gene_variant	MODIFIER	-	ENSG00000223642	Transcript	ENST00000420020.5	lncRNA
2_159382867_G/A	2:159382867-159382867	A	downstream_gene_variant	MODIFIER	BAZ2B	ENSG00000123636	Transcript	ENST00000485917.1	protein_coding_CDS_not_defined
2_159382867_G/A	2:159382867-159382867	A	downstream_gene_variant	MODIFIER	BAZ2B	ENSG00000123636	Transcript	ENST00000551504.5	protein_coding_CDS_not_defined
2_159384181_G/A	2:159384181-159384181	A	downstream_gene_variant	MODIFIER	BAZ2B	ENSG00000123636	Transcript	ENST00000294905.4	protein_coding
2_159384181_G/A	2:159384181-159384181	A	intron_variant	MODIFIER	BAZ2B	ENSG00000123636	Transcript	ENST00000392782.5	protein_coding
2_159384181_G/A	2:159384181-159384181	A	intron_variant	MODIFIER	BAZ2B	ENSG00000123636	Transcript	ENST00000392783.7	protein_coding
2_159384181_G/A	2:159384181-159384181	A	upstream_gene_variant	MODIFIER	-	ENSG00000223642	Transcript	ENST00000420020.5	lncRNA
2_159384181_G/A	2:159384181-159384181	A	downstream_gene_variant	MODIFIER	BAZ2B	ENSG00000123636	Transcript	ENST00000485917.1	protein_coding_CDS_not_defined
2_159384181_G/A	2:159384181-159384181	A	downstream_gene_variant	MODIFIER	BAZ2B	ENSG00000123636	Transcript	ENST00000551504.5	protein_coding_CDS_not_defined
2_159385913_G/A	2:159385913-159385913	A	downstream_gene_variant	MODIFIER	BAZ2B	ENSG00000123636	Transcript	ENST00000294905.4	protein_coding
2_159385913_G/A	2:159385913-159385913	A	intron_variant	MODIFIER	BAZ2B	ENSG00000123636	Transcript	ENST00000392782.5	protein_coding
2_159385913_G/A	2:159385913-159385913	A	intron_variant	MODIFIER	BAZ2B	ENSG00000123636	Transcript	ENST00000392783.7	protein_coding
2_159385913_G/A	2:159385913-159385913	A	upstream_gene_variant	MODIFIER	-	ENSG00000223642	Transcript	ENST00000420020.5	lncRNA
2_159385913_G/A	2:159385913-159385913	A	intron_variant,non_coding_transcript_variant	MODIFIER	BAZ2B	ENSG00000123636	Transcript	ENST00000485917.1	protein_coding_CDS_not_defined
2_159385913_G/A	2:159385913-159385913	A	intron_variant,non_coding_transcript_variant	MODIFIER	BAZ2B	ENSG00000123636	Transcript	ENST00000551504.5	protein_coding_CDS_not_defined
2_159386105_T/A	2:159386105-159386105	A	downstream_gene_variant	MODIFIER	BAZ2B	ENSG00000123636	Transcript	ENST00000294905.4	protein_coding
2_159386105_T/A	2:159386105-159386105	A	intron_variant	MODIFIER	BAZ2B	ENSG00000123636	Transcript	ENST00000392782.5	protein_coding
2_159386105_T/A	2:159386105-159386105	A	intron_variant	MODIFIER	BAZ2B	ENSG00000123636	Transcript	ENST00000392783.7	protein_coding
2_159386105_T/A	2:159386105-159386105	A	upstream_gene_variant	MODIFIER	-	ENSG00000223642	Transcript	ENST00000420020.5	lncRNA
2_159386105_T/A	2:159386105-159386105	A	intron_variant,non_coding_transcript_variant	MODIFIER	BAZ2B	ENSG00000123636	Transcript	ENST00000485917.1	protein_coding_CDS_not_defined
2_159386105_T/A	2:159386105-159386105	A	intron_variant,non_coding_transcript_variant	MODIFIER	BAZ2B	ENSG00000123636	Transcript	ENST00000551504.5	protein_coding_CDS_not_defined
2_159386672_T/A	2:159386672-159386672	A	intron_variant	MODIFIER	BAZ2B	ENSG00000123636	Transcript	ENST00000294905.4	protein_coding
2_159386672_T/A	2:159386672-159386672	A	intron_variant	MODIFIER	BAZ2B	ENSG00000123636	Transcript	ENST00000392782.5	protein_coding
2_159386672_T/A	2:159386672-159386672	A	intron_variant	MODIFIER	BAZ2B	ENSG00000123636	Transcript	ENST00000392783.7	protein_coding
2_159386672_T/A	2:159386672-159386672	A	intron_variant,non_coding_transcript_variant	MODIFIER	-	ENSG00000223642	Transcript	ENST00000420020.5	lncRNA
2_159386672_T/A	2:159386672-159386672	A	intron_variant,non_coding_transcript_variant	MODIFIER	BAZ2B	ENSG00000123636	Transcript	ENST00000485917.1	protein_coding_CDS_not_defined
2_159386672_T/A	2:159386672-159386672	A	intron_variant,non_coding_transcript_variant	MODIFIER	BAZ2B	ENSG00000123636	Transcript	ENST00000551504.5	protein_coding_CDS_not_defined
2_159386673_T/A	2:159386673-159386673	A	intron_variant	MODIFIER	BAZ2B	ENSG00000123636	Transcript	ENST00000294905.4	protein_coding
2_159386673_T/A	2:159386673-159386673	A	intron_variant	MODIFIER	BAZ2B	ENSG00000123636	Transcript	ENST00000392782.5	protein_coding
2_159386673_T/A	2:159386673-159386673	A	intron_variant	MODIFIER	BAZ2B	ENSG00000123636	Transcript	ENST00000392783.7	protein_coding
2_159386673_T/A	2:159386673-159386673	A	intron_variant,non_coding_transcript_variant	MODIFIER	-	ENSG00000223642	Transcript	ENST00000420020.5	lncRNA
2_159386673_T/A	2:159386673-159386673	A	intron_variant,non_coding_transcript_variant	MODIFIER	BAZ2B	ENSG00000123636	Transcript	ENST00000485917.1	protein_coding_CDS_not_defined
2_159386673_T/A	2:159386673-159386673	A	intron_variant,non_coding_transcript_variant	MODIFIER	BAZ2B	ENSG00000123636	Transcript	ENST00000551504.5	protein_coding_CDS_not_defined
2_159387215_G/A	2:159387215-159387215	A	intron_variant	MODIFIER	BAZ2B	ENSG00000123636	Transcript	ENST00000294905.4	protein_coding
2_159387215_G/A	2:159387215-159387215	A	intron_variant	MODIFIER	BAZ2B	ENSG00000123636	Transcript	ENST00000392782.5	protein_coding
2_159387215_G/A	2:159387215-159387215	A	intron_variant	MODIFIER	BAZ2B	ENSG00000123636	Transcript	ENST00000392783.7	protein_coding
2_159387215_G/A	2:159387215-159387215	A	intron_variant,non_coding_transcript_variant	MODIFIER	-	ENSG00000223642	Transcript	ENST00000420020.5	lncRNA
2_159387215_G/A	2:159387215-159387215	A	intron_variant,non_coding_transcript_variant	MODIFIER	BAZ2B	ENSG00000123636	Transcript	ENST00000485917.1	protein_coding_CDS_not_defined
2_159387215_G/A	2:159387215-159387215	A	intron_variant,non_coding_transcript_variant	MODIFIER	BAZ2B	ENSG00000123636	Transcript	ENST00000551504.5	protein_coding_CDS_not_defined
2_159387283_C/T	2:159387283-159387283	T	intron_variant	MODIFIER	BAZ2B	ENSG00000123636	Transcript	ENST00000294905.4	protein_coding
2_159387283_C/T	2:159387283-159387283	T	intron_variant	MODIFIER	BAZ2B	ENSG00000123636	Transcript	ENST00000392782.5	protein_coding
2_159387283_C/T	2:159387283-159387283	T	intron_variant	MODIFIER	BAZ2B	ENSG00000123636	Transcript	ENST00000392783.7	protein_coding
2_159387283_C/T	2:159387283-159387283	T	intron_variant,non_coding_transcript_variant	MODIFIER	-	ENSG00000223642	Transcript	ENST00000420020.5	lncRNA
2_159387283_C/T	2:159387283-159387283	T	intron_variant,non_coding_transcript_variant	MODIFIER	BAZ2B	ENSG00000123636	Transcript	ENST00000485917.1	protein_coding_CDS_not_defined
2_159387283_C/T	2:159387283-159387283	T	intron_variant,non_coding_transcript_variant	MODIFIER	BAZ2B	ENSG00000123636	Transcript	ENST00000551504.5	protein_coding_CDS_not_defined
2_159387569_C/T	2:159387569-159387569	T	intron_variant	MODIFIER	BAZ2B	ENSG00000123636	Transcript	ENST00000294905.4	protein_coding
2_159387569_C/T	2:159387569-159387569	T	intron_variant	MODIFIER	BAZ2B	ENSG00000123636	Transcript	ENST00000392782.5	protein_coding
2_159387569_C/T	2:159387569-159387569	T	intron_variant	MODIFIER	BAZ2B	ENSG00000123636	Transcript	ENST00000392783.7	protein_coding
2_159387569_C/T	2:159387569-159387569	T	intron_variant,non_coding_transcript_variant	MODIFIER	-	ENSG00000223642	Transcript	ENST00000420020.5	lncRNA
2_159387569_C/T	2:159387569-159387569	T	intron_variant,non_coding_transcript_variant	MODIFIER	BAZ2B	ENSG00000123636	Transcript	ENST00000485917.1	protein_coding_CDS_not_defined
2_159387569_C/T	2:159387569-159387569	T	intron_variant,non_coding_transcript_variant	MODIFIER	BAZ2B	ENSG00000123636	Transcript	ENST00000551504.5	protein_coding_CDS_not_defined
2_159387694_G/A	2:159387694-159387694	A	intron_variant	MODIFIER	BAZ2B	ENSG00000123636	Transcript	ENST00000294905.4	protein_coding
2_159387694_G/A	2:159387694-159387694	A	intron_variant	MODIFIER	BAZ2B	ENSG00000123636	Transcript	ENST00000392782.5	protein_coding
2_159387694_G/A	2:159387694-159387694	A	intron_variant	MODIFIER	BAZ2B	ENSG00000123636	Transcript	ENST00000392783.7	protein_coding
2_159387694_G/A	2:159387694-159387694	A	intron_variant,non_coding_transcript_variant	MODIFIER	-	ENSG00000223642	Transcript	ENST00000420020.5	lncRNA
2_159387694_G/A	2:159387694-159387694	A	intron_variant,non_coding_transcript_variant	MODIFIER	BAZ2B	ENSG00000123636	Transcript	ENST00000485917.1	protein_coding_CDS_not_defined
2_159387694_G/A	2:159387694-159387694	A	intron_variant,non_coding_transcript_variant	MODIFIER	BAZ2B	ENSG00000123636	Transcript	ENST00000551504.5	protein_coding_CDS_not_defined
2_159388577_T/A	2:159388577-159388577	A	intron_variant	MODIFIER	BAZ2B	ENSG00000123636	Transcript	ENST00000294905.4	protein_coding
2_159388577_T/A	2:159388577-159388577	A	intron_variant	MODIFIER	BAZ2B	ENSG00000123636	Transcript	ENST00000392782.5	protein_coding
2_159388577_T/A	2:159388577-159388577	A	intron_variant	MODIFIER	BAZ2B	ENSG00000123636	Transcript	ENST00000392783.7	protein_coding
2_159388577_T/A	2:159388577-159388577	A	intron_variant,non_coding_transcript_variant	MODIFIER	-	ENSG00000223642	Transcript	ENST00000420020.5	lncRNA
2_159388577_T/A	2:159388577-159388577	A	intron_variant,non_coding_transcript_variant	MODIFIER	BAZ2B	ENSG00000123636	Transcript	ENST00000485917.1	protein_coding_CDS_not_defined
2_159388577_T/A	2:159388577-159388577	A	intron_variant,non_coding_transcript_variant	MODIFIER	BAZ2B	ENSG00000123636	Transcript	ENST00000551504.5	protein_coding_CDS_not_defined
2_159392137_G/A	2:159392137-159392137	A	intron_variant	MODIFIER	BAZ2B	ENSG00000123636	Transcript	ENST00000294905.4	protein_coding
2_159392137_G/A	2:159392137-159392137	A	intron_variant	MODIFIER	BAZ2B	ENSG00000123636	Transcript	ENST00000392782.5	protein_coding
2_159392137_G/A	2:159392137-159392137	A	intron_variant	MODIFIER	BAZ2B	ENSG00000123636	Transcript	ENST00000392783.7	protein_coding
2_159392137_G/A	2:159392137-159392137	A	non_coding_transcript_exon_variant	MODIFIER	-	ENSG00000223642	Transcript	ENST00000420020.5	lncRNA
2_159392137_G/A	2:159392137-159392137	A	non_coding_transcript_exon_variant	MODIFIER	BAZ2B	ENSG00000123636	Transcript	ENST00000485917.1	protein_coding_CDS_not_defined
2_159392137_G/A	2:159392137-159392137	A	intron_variant,non_coding_transcript_variant	MODIFIER	BAZ2B	ENSG00000123636	Transcript	ENST00000551504.5	protein_coding_CDS_not_defined
2_159392137_G/A	2:159392137-159392137	A	upstream_gene_variant	MODIFIER	-	ENSG00000223642	Transcript	ENST00000594921.1	lncRNA
2_159392137_G/A	2:159392137-159392137	A	upstream_gene_variant	MODIFIER	-	ENSG00000223642	Transcript	ENST00000608714.5	lncRNA
2_159392137_G/A	2:159392137-159392137	A	upstream_gene_variant	MODIFIER	-	ENSG00000223642	Transcript	ENST00000626302.1	lncRNA
2_159392606_G/C	2:159392606-159392606	C	intron_variant	MODIFIER	BAZ2B	ENSG00000123636	Transcript	ENST00000294905.4	protein_coding
2_159392606_G/C	2:159392606-159392606	C	intron_variant	MODIFIER	BAZ2B	ENSG00000123636	Transcript	ENST00000392782.5	protein_coding
2_159392606_G/C	2:159392606-159392606	C	intron_variant	MODIFIER	BAZ2B	ENSG00000123636	Transcript	ENST00000392783.7	protein_coding
2_159392606_G/C	2:159392606-159392606	C	intron_variant,non_coding_transcript_variant	MODIFIER	-	ENSG00000223642	Transcript	ENST00000420020.5	lncRNA
2_159392606_G/C	2:159392606-159392606	C	upstream_gene_variant	MODIFIER	BAZ2B	ENSG00000123636	Transcript	ENST00000485917.1	protein_coding_CDS_not_defined
2_159392606_G/C	2:159392606-159392606	C	intron_variant,non_coding_transcript_variant	MODIFIER	BAZ2B	ENSG00000123636	Transcript	ENST00000551504.5	protein_coding_CDS_not_defined
2_159392606_G/C	2:159392606-159392606	C	upstream_gene_variant	MODIFIER	-	ENSG00000223642	Transcript	ENST00000594921.1	lncRNA
2_159392606_G/C	2:159392606-159392606	C	upstream_gene_variant	MODIFIER	-	ENSG00000223642	Transcript	ENST00000608714.5	lncRNA
2_159392606_G/C	2:159392606-159392606	C	upstream_gene_variant	MODIFIER	-	ENSG00000223642	Transcript	ENST00000626302.1	lncRNA
2_159393260_C/T	2:159393260-159393260	T	intron_variant	MODIFIER	BAZ2B	ENSG00000123636	Transcript	ENST00000294905.4	protein_coding
2_159393260_C/T	2:159393260-159393260	T	intron_variant	MODIFIER	BAZ2B	ENSG00000123636	Transcript	ENST00000392782.5	protein_coding
2_159393260_C/T	2:159393260-159393260	T	intron_variant	MODIFIER	BAZ2B	ENSG00000123636	Transcript	ENST00000392783.7	protein_coding
2_159393260_C/T	2:159393260-159393260	T	intron_variant,non_coding_transcript_variant	MODIFIER	-	ENSG00000223642	Transcript	ENST00000420020.5	lncRNA
2_159393260_C/T	2:159393260-159393260	T	upstream_gene_variant	MODIFIER	BAZ2B	ENSG00000123636	Transcript	ENST00000485917.1	protein_coding_CDS_not_defined
2_159393260_C/T	2:159393260-159393260	T	intron_variant,non_coding_transcript_variant	MODIFIER	BAZ2B	ENSG00000123636	Transcript	ENST00000551504.5	protein_coding_CDS_not_defined
2_159393260_C/T	2:159393260-159393260	T	upstream_gene_variant	MODIFIER	-	ENSG00000223642	Transcript	ENST00000594921.1	lncRNA
2_159393260_C/T	2:159393260-159393260	T	upstream_gene_variant	MODIFIER	-	ENSG00000223642	Transcript	ENST00000608714.5	lncRNA
2_159393260_C/T	2:159393260-159393260	T	upstream_gene_variant	MODIFIER	-	ENSG00000223642	Transcript	ENST00000626302.1	lncRNA
2_159393260_C/T	2:159393260-159393260	T	upstream_gene_variant	MODIFIER	-	ENSG00000223642	Transcript	ENST00000627036.1	lncRNA
2_159393629_T/A	2:159393629-159393629	A	intron_variant	MODIFIER	BAZ2B	ENSG00000123636	Transcript	ENST00000294905.4	protein_coding
2_159393629_T/A	2:159393629-159393629	A	intron_variant	MODIFIER	BAZ2B	ENSG00000123636	Transcript	ENST00000392782.5	protein_coding
2_159393629_T/A	2:159393629-159393629	A	intron_variant	MODIFIER	BAZ2B	ENSG00000123636	Transcript	ENST00000392783.7	protein_coding
2_159393629_T/A	2:159393629-159393629	A	intron_variant,non_coding_transcript_variant	MODIFIER	-	ENSG00000223642	Transcript	ENST00000420020.5	lncRNA
2_159393629_T/A	2:159393629-159393629	A	upstream_gene_variant	MODIFIER	BAZ2B	ENSG00000123636	Transcript	ENST00000485917.1	protein_coding_CDS_not_defined
2_159393629_T/A	2:159393629-159393629	A	intron_variant,non_coding_transcript_variant	MODIFIER	BAZ2B	ENSG00000123636	Transcript	ENST00000551504.5	protein_coding_CDS_not_defined
2_159393629_T/A	2:159393629-159393629	A	upstream_gene_variant	MODIFIER	-	ENSG00000223642	Transcript	ENST00000594921.1	lncRNA
2_159393629_T/A	2:159393629-159393629	A	upstream_gene_variant	MODIFIER	-	ENSG00000223642	Transcript	ENST00000608714.5	lncRNA
2_159393629_T/A	2:159393629-159393629	A	upstream_gene_variant	MODIFIER	-	ENSG00000223642	Transcript	ENST00000626302.1	lncRNA
2_159393629_T/A	2:159393629-159393629	A	upstream_gene_variant	MODIFIER	-	ENSG00000223642	Transcript	ENST00000627036.1	lncRNA
2_159395061_G/A	2:159395061-159395061	A	intron_variant	MODIFIER	BAZ2B	ENSG00000123636	Transcript	ENST00000294905.4	protein_coding
2_159395061_G/A	2:159395061-159395061	A	intron_variant	MODIFIER	BAZ2B	ENSG00000123636	Transcript	ENST00000392782.5	protein_coding
2_159395061_G/A	2:159395061-159395061	A	intron_variant	MODIFIER	BAZ2B	ENSG00000123636	Transcript	ENST00000392783.7	protein_coding
2_159395061_G/A	2:159395061-159395061	A	intron_variant,non_coding_transcript_variant	MODIFIER	-	ENSG00000223642	Transcript	ENST00000420020.5	lncRNA
2_159395061_G/A	2:159395061-159395061	A	upstream_gene_variant	MODIFIER	BAZ2B	ENSG00000123636	Transcript	ENST00000485917.1	protein_coding_CDS_not_defined
2_159395061_G/A	2:159395061-159395061	A	intron_variant,non_coding_transcript_variant	MODIFIER	BAZ2B	ENSG00000123636	Transcript	ENST00000551504.5	protein_coding_CDS_not_defined
2_159395061_G/A	2:159395061-159395061	A	upstream_gene_variant	MODIFIER	-	ENSG00000223642	Transcript	ENST00000594921.1	lncRNA
2_159395061_G/A	2:159395061-159395061	A	upstream_gene_variant	MODIFIER	-	ENSG00000223642	Transcript	ENST00000608714.5	lncRNA
2_159395061_G/A	2:159395061-159395061	A	upstream_gene_variant	MODIFIER	-	ENSG00000223642	Transcript	ENST00000626302.1	lncRNA
2_159395061_G/A	2:159395061-159395061	A	upstream_gene_variant	MODIFIER	-	ENSG00000223642	Transcript	ENST00000627036.1	lncRNA
2_159396057_G/A	2:159396057-159396057	A	intron_variant	MODIFIER	BAZ2B	ENSG00000123636	Transcript	ENST00000294905.4	protein_coding
2_159396057_G/A	2:159396057-159396057	A	intron_variant	MODIFIER	BAZ2B	ENSG00000123636	Transcript	ENST00000392782.5	protein_coding
2_159396057_G/A	2:159396057-159396057	A	intron_variant	MODIFIER	BAZ2B	ENSG00000123636	Transcript	ENST00000392783.7	protein_coding
2_159396057_G/A	2:159396057-159396057	A	intron_variant,non_coding_transcript_variant	MODIFIER	-	ENSG00000223642	Transcript	ENST00000420020.5	lncRNA
2_159396057_G/A	2:159396057-159396057	A	downstream_gene_variant	MODIFIER	BAZ2B	ENSG00000123636	Transcript	ENST00000482501.5	protein_coding_CDS_not_defined
2_159396057_G/A	2:159396057-159396057	A	upstream_gene_variant	MODIFIER	BAZ2B	ENSG00000123636	Transcript	ENST00000485917.1	protein_coding_CDS_not_defined
2_159396057_G/A	2:159396057-159396057	A	intron_variant,non_coding_transcript_variant	MODIFIER	BAZ2B	ENSG00000123636	Transcript	ENST00000551504.5	protein_coding_CDS_not_defined
2_159396057_G/A	2:159396057-159396057	A	non_coding_transcript_exon_variant	MODIFIER	-	ENSG00000223642	Transcript	ENST00000594921.1	lncRNA
2_159396057_G/A	2:159396057-159396057	A	non_coding_transcript_exon_variant	MODIFIER	-	ENSG00000223642	Transcript	ENST00000608714.5	lncRNA
2_159396057_G/A	2:159396057-159396057	A	non_coding_transcript_exon_variant	MODIFIER	-	ENSG00000223642	Transcript	ENST00000626302.1	lncRNA
2_159396057_G/A	2:159396057-159396057	A	upstream_gene_variant	MODIFIER	-	ENSG00000223642	Transcript	ENST00000627036.1	lncRNA
2_159398147_G/A	2:159398147-159398147	A	intron_variant	MODIFIER	BAZ2B	ENSG00000123636	Transcript	ENST00000294905.4	protein_coding
2_159398147_G/A	2:159398147-159398147	A	intron_variant	MODIFIER	BAZ2B	ENSG00000123636	Transcript	ENST00000392782.5	protein_coding
2_159398147_G/A	2:159398147-159398147	A	intron_variant	MODIFIER	BAZ2B	ENSG00000123636	Transcript	ENST00000392783.7	protein_coding
2_159398147_G/A	2:159398147-159398147	A	intron_variant,non_coding_transcript_variant	MODIFIER	-	ENSG00000223642	Transcript	ENST00000420020.5	lncRNA
2_159398147_G/A	2:159398147-159398147	A	downstream_gene_variant	MODIFIER	BAZ2B	ENSG00000123636	Transcript	ENST00000482501.5	protein_coding_CDS_not_defined
2_159398147_G/A	2:159398147-159398147	A	intron_variant,non_coding_transcript_variant	MODIFIER	BAZ2B	ENSG00000123636	Transcript	ENST00000551504.5	protein_coding_CDS_not_defined
2_159398147_G/A	2:159398147-159398147	A	intron_variant,non_coding_transcript_variant	MODIFIER	-	ENSG00000223642	Transcript	ENST00000594921.1	lncRNA
2_159398147_G/A	2:159398147-159398147	A	intron_variant,non_coding_transcript_variant	MODIFIER	-	ENSG00000223642	Transcript	ENST00000608714.5	lncRNA
2_159398147_G/A	2:159398147-159398147	A	intron_variant,non_coding_transcript_variant	MODIFIER	-	ENSG00000223642	Transcript	ENST00000626302.1	lncRNA
2_159398147_G/A	2:159398147-159398147	A	upstream_gene_variant	MODIFIER	-	ENSG00000223642	Transcript	ENST00000627036.1	lncRNA
2_159399171_C/A	2:159399171-159399171	A	intron_variant	MODIFIER	BAZ2B	ENSG00000123636	Transcript	ENST00000294905.4	protein_coding
2_159399171_C/A	2:159399171-159399171	A	intron_variant	MODIFIER	BAZ2B	ENSG00000123636	Transcript	ENST00000392782.5	protein_coding
2_159399171_C/A	2:159399171-159399171	A	intron_variant	MODIFIER	BAZ2B	ENSG00000123636	Transcript	ENST00000392783.7	protein_coding
2_159399171_C/A	2:159399171-159399171	A	intron_variant,non_coding_transcript_variant	MODIFIER	-	ENSG00000223642	Transcript	ENST00000420020.5	lncRNA
2_159399171_C/A	2:159399171-159399171	A	downstream_gene_variant	MODIFIER	BAZ2B	ENSG00000123636	Transcript	ENST00000482501.5	protein_coding_CDS_not_defined
2_159399171_C/A	2:159399171-159399171	A	upstream_gene_variant	MODIFIER	BAZ2B	ENSG00000123636	Transcript	ENST00000551504.5	protein_coding_CDS_not_defined
2_159399171_C/A	2:159399171-159399171	A	intron_variant,non_coding_transcript_variant	MODIFIER	-	ENSG00000223642	Transcript	ENST00000594921.1	lncRNA
2_159399171_C/A	2:159399171-159399171	A	downstream_gene_variant	MODIFIER	-	ENSG00000223642	Transcript	ENST00000608714.5	lncRNA
2_159399171_C/A	2:159399171-159399171	A	downstream_gene_variant	MODIFIER	-	ENSG00000223642	Transcript	ENST00000626302.1	lncRNA
2_159399171_C/A	2:159399171-159399171	A	downstream_gene_variant	MODIFIER	-	ENSG00000223642	Transcript	ENST00000627036.1	lncRNA
2_159399817_G/A	2:159399817-159399817	A	intron_variant	MODIFIER	BAZ2B	ENSG00000123636	Transcript	ENST00000294905.4	protein_coding
2_159399817_G/A	2:159399817-159399817	A	intron_variant	MODIFIER	BAZ2B	ENSG00000123636	Transcript	ENST00000392782.5	protein_coding
2_159399817_G/A	2:159399817-159399817	A	intron_variant	MODIFIER	BAZ2B	ENSG00000123636	Transcript	ENST00000392783.7	protein_coding
2_159399817_G/A	2:159399817-159399817	A	intron_variant,non_coding_transcript_variant	MODIFIER	-	ENSG00000223642	Transcript	ENST00000420020.5	lncRNA
2_159399817_G/A	2:159399817-159399817	A	downstream_gene_variant	MODIFIER	BAZ2B	ENSG00000123636	Transcript	ENST00000472953.1	retained_intron
2_159399817_G/A	2:159399817-159399817	A	downstream_gene_variant	MODIFIER	BAZ2B	ENSG00000123636	Transcript	ENST00000482501.5	protein_coding_CDS_not_defined
2_159399817_G/A	2:159399817-159399817	A	upstream_gene_variant	MODIFIER	BAZ2B	ENSG00000123636	Transcript	ENST00000551504.5	protein_coding_CDS_not_defined
2_159399817_G/A	2:159399817-159399817	A	intron_variant,non_coding_transcript_variant	MODIFIER	-	ENSG00000223642	Transcript	ENST00000594921.1	lncRNA
2_159399817_G/A	2:159399817-159399817	A	downstream_gene_variant	MODIFIER	-	ENSG00000223642	Transcript	ENST00000608714.5	lncRNA
2_159399817_G/A	2:159399817-159399817	A	downstream_gene_variant	MODIFIER	-	ENSG00000223642	Transcript	ENST00000626302.1	lncRNA
2_159399817_G/A	2:159399817-159399817	A	downstream_gene_variant	MODIFIER	-	ENSG00000223642	Transcript	ENST00000627036.1	lncRNA
2_159399817_G/A	2:159399817-159399817	A	regulatory_region_variant	MODIFIER	-	-	RegulatoryFeature	ENSR00000625513	enhancer
2_159401859_C/T	2:159401859-159401859	T	upstream_gene_variant	MODIFIER	BAZ2B	ENSG00000123636	Transcript	ENST00000294905.4	protein_coding
2_159401859_C/T	2:159401859-159401859	T	intron_variant	MODIFIER	BAZ2B	ENSG00000123636	Transcript	ENST00000392782.5	protein_coding
2_159401859_C/T	2:159401859-159401859	T	intron_variant	MODIFIER	BAZ2B	ENSG00000123636	Transcript	ENST00000392783.7	protein_coding
2_159401859_C/T	2:159401859-159401859	T	intron_variant,non_coding_transcript_variant	MODIFIER	-	ENSG00000223642	Transcript	ENST00000420020.5	lncRNA
2_159401859_C/T	2:159401859-159401859	T	downstream_gene_variant	MODIFIER	BAZ2B	ENSG00000123636	Transcript	ENST00000472953.1	retained_intron
2_159401859_C/T	2:159401859-159401859	T	intron_variant,non_coding_transcript_variant	MODIFIER	BAZ2B	ENSG00000123636	Transcript	ENST00000482501.5	protein_coding_CDS_not_defined
2_159401859_C/T	2:159401859-159401859	T	upstream_gene_variant	MODIFIER	BAZ2B	ENSG00000123636	Transcript	ENST00000551504.5	protein_coding_CDS_not_defined
2_159401859_C/T	2:159401859-159401859	T	intron_variant,non_coding_transcript_variant	MODIFIER	-	ENSG00000223642	Transcript	ENST00000594921.1	lncRNA
2_159401859_C/T	2:159401859-159401859	T	downstream_gene_variant	MODIFIER	-	ENSG00000223642	Transcript	ENST00000608714.5	lncRNA
2_159401859_C/T	2:159401859-159401859	T	downstream_gene_variant	MODIFIER	-	ENSG00000223642	Transcript	ENST00000626302.1	lncRNA
2_159401859_C/T	2:159401859-159401859	T	downstream_gene_variant	MODIFIER	-	ENSG00000223642	Transcript	ENST00000627036.1	lncRNA
2_159406182_C/T	2:159406182-159406182	T	intron_variant	MODIFIER	BAZ2B	ENSG00000123636	Transcript	ENST00000392782.5	protein_coding
2_159406182_C/T	2:159406182-159406182	T	intron_variant	MODIFIER	BAZ2B	ENSG00000123636	Transcript	ENST00000392783.7	protein_coding
2_159406182_C/T	2:159406182-159406182	T	downstream_gene_variant	MODIFIER	-	ENSG00000223642	Transcript	ENST00000420020.5	lncRNA
2_159406182_C/T	2:159406182-159406182	T	intron_variant,non_coding_transcript_variant	MODIFIER	BAZ2B	ENSG00000123636	Transcript	ENST00000472953.1	retained_intron
2_159406182_C/T	2:159406182-159406182	T	intron_variant,non_coding_transcript_variant	MODIFIER	BAZ2B	ENSG00000123636	Transcript	ENST00000482501.5	protein_coding_CDS_not_defined
2_159406182_C/T	2:159406182-159406182	T	downstream_gene_variant	MODIFIER	-	ENSG00000223642	Transcript	ENST00000594921.1	lncRNA
2_159407982_C/T	2:159407982-159407982	T	intron_variant	MODIFIER	BAZ2B	ENSG00000123636	Transcript	ENST00000392782.5	protein_coding
2_159407982_C/T	2:159407982-159407982	T	intron_variant	MODIFIER	BAZ2B	ENSG00000123636	Transcript	ENST00000392783.7	protein_coding
2_159407982_C/T	2:159407982-159407982	T	downstream_gene_variant	MODIFIER	-	ENSG00000223642	Transcript	ENST00000420020.5	lncRNA
2_159407982_C/T	2:159407982-159407982	T	downstream_gene_variant	MODIFIER	BAZ2B	ENSG00000123636	Transcript	ENST00000441143.1	protein_coding
2_159407982_C/T	2:159407982-159407982	T	intron_variant,non_coding_transcript_variant	MODIFIER	BAZ2B	ENSG00000123636	Transcript	ENST00000472953.1	retained_intron
2_159407982_C/T	2:159407982-159407982	T	intron_variant,non_coding_transcript_variant	MODIFIER	BAZ2B	ENSG00000123636	Transcript	ENST00000482501.5	protein_coding_CDS_not_defined
2_159407982_C/T	2:159407982-159407982	T	downstream_gene_variant	MODIFIER	-	ENSG00000223642	Transcript	ENST00000594921.1	lncRNA
2_159408209_G/T	2:159408209-159408209	T	intron_variant	MODIFIER	BAZ2B	ENSG00000123636	Transcript	ENST00000392782.5	protein_coding
2_159408209_G/T	2:159408209-159408209	T	intron_variant	MODIFIER	BAZ2B	ENSG00000123636	Transcript	ENST00000392783.7	protein_coding
2_159408209_G/T	2:159408209-159408209	T	downstream_gene_variant	MODIFIER	-	ENSG00000223642	Transcript	ENST00000420020.5	lncRNA
2_159408209_G/T	2:159408209-159408209	T	downstream_gene_variant	MODIFIER	BAZ2B	ENSG00000123636	Transcript	ENST00000441143.1	protein_coding
2_159408209_G/T	2:159408209-159408209	T	intron_variant,non_coding_transcript_variant	MODIFIER	BAZ2B	ENSG00000123636	Transcript	ENST00000472953.1	retained_intron
2_159408209_G/T	2:159408209-159408209	T	intron_variant,non_coding_transcript_variant	MODIFIER	BAZ2B	ENSG00000123636	Transcript	ENST00000482501.5	protein_coding_CDS_not_defined
2_159408209_G/T	2:159408209-159408209	T	downstream_gene_variant	MODIFIER	-	ENSG00000223642	Transcript	ENST00000594921.1	lncRNA
2_159409009_G/A	2:159409009-159409009	A	intron_variant	MODIFIER	BAZ2B	ENSG00000123636	Transcript	ENST00000392782.5	protein_coding
2_159409009_G/A	2:159409009-159409009	A	intron_variant	MODIFIER	BAZ2B	ENSG00000123636	Transcript	ENST00000392783.7	protein_coding
2_159409009_G/A	2:159409009-159409009	A	downstream_gene_variant	MODIFIER	-	ENSG00000223642	Transcript	ENST00000420020.5	lncRNA
2_159409009_G/A	2:159409009-159409009	A	downstream_gene_variant	MODIFIER	BAZ2B	ENSG00000123636	Transcript	ENST00000441143.1	protein_coding
2_159409009_G/A	2:159409009-159409009	A	intron_variant,non_coding_transcript_variant	MODIFIER	BAZ2B	ENSG00000123636	Transcript	ENST00000472953.1	retained_intron
2_159409009_G/A	2:159409009-159409009	A	intron_variant,non_coding_transcript_variant	MODIFIER	BAZ2B	ENSG00000123636	Transcript	ENST00000482501.5	protein_coding_CDS_not_defined
2_159409009_G/A	2:159409009-159409009	A	downstream_gene_variant	MODIFIER	-	ENSG00000223642	Transcript	ENST00000594921.1	lncRNA
2_159411581_C/T	2:159411581-159411581	T	intron_variant	MODIFIER	BAZ2B	ENSG00000123636	Transcript	ENST00000392782.5	protein_coding
2_159411581_C/T	2:159411581-159411581	T	intron_variant	MODIFIER	BAZ2B	ENSG00000123636	Transcript	ENST00000392783.7	protein_coding
2_159411581_C/T	2:159411581-159411581	T	downstream_gene_variant	MODIFIER	BAZ2B	ENSG00000123636	Transcript	ENST00000441143.1	protein_coding
2_159411581_C/T	2:159411581-159411581	T	intron_variant,non_coding_transcript_variant	MODIFIER	BAZ2B	ENSG00000123636	Transcript	ENST00000472953.1	retained_intron
2_159411581_C/T	2:159411581-159411581	T	intron_variant,non_coding_transcript_variant	MODIFIER	BAZ2B	ENSG00000123636	Transcript	ENST00000482501.5	protein_coding_CDS_not_defined
2_159411813_C/T	2:159411813-159411813	T	intron_variant	MODIFIER	BAZ2B	ENSG00000123636	Transcript	ENST00000392782.5	protein_coding
2_159411813_C/T	2:159411813-159411813	T	intron_variant	MODIFIER	BAZ2B	ENSG00000123636	Transcript	ENST00000392783.7	protein_coding
2_159411813_C/T	2:159411813-159411813	T	downstream_gene_variant	MODIFIER	BAZ2B	ENSG00000123636	Transcript	ENST00000441143.1	protein_coding
2_159411813_C/T	2:159411813-159411813	T	intron_variant,non_coding_transcript_variant	MODIFIER	BAZ2B	ENSG00000123636	Transcript	ENST00000472953.1	retained_intron
2_159411813_C/T	2:159411813-159411813	T	intron_variant,non_coding_transcript_variant	MODIFIER	BAZ2B	ENSG00000123636	Transcript	ENST00000482501.5	protein_coding_CDS_not_defined
2_159411882_G/A	2:159411882-159411882	A	intron_variant	MODIFIER	BAZ2B	ENSG00000123636	Transcript	ENST00000392782.5	protein_coding
2_159411882_G/A	2:159411882-159411882	A	intron_variant	MODIFIER	BAZ2B	ENSG00000123636	Transcript	ENST00000392783.7	protein_coding
2_159411882_G/A	2:159411882-159411882	A	downstream_gene_variant	MODIFIER	BAZ2B	ENSG00000123636	Transcript	ENST00000441143.1	protein_coding
2_159411882_G/A	2:159411882-159411882	A	intron_variant,non_coding_transcript_variant	MODIFIER	BAZ2B	ENSG00000123636	Transcript	ENST00000472953.1	retained_intron
2_159411882_G/A	2:159411882-159411882	A	intron_variant,non_coding_transcript_variant	MODIFIER	BAZ2B	ENSG00000123636	Transcript	ENST00000482501.5	protein_coding_CDS_not_defined
2_159412797_C/T	2:159412797-159412797	T	intron_variant	MODIFIER	BAZ2B	ENSG00000123636	Transcript	ENST00000392782.5	protein_coding
2_159412797_C/T	2:159412797-159412797	T	intron_variant	MODIFIER	BAZ2B	ENSG00000123636	Transcript	ENST00000392783.7	protein_coding
2_159412797_C/T	2:159412797-159412797	T	intron_variant	MODIFIER	BAZ2B	ENSG00000123636	Transcript	ENST00000441143.1	protein_coding
2_159412797_C/T	2:159412797-159412797	T	intron_variant,non_coding_transcript_variant	MODIFIER	BAZ2B	ENSG00000123636	Transcript	ENST00000472953.1	retained_intron
2_159412797_C/T	2:159412797-159412797	T	intron_variant,non_coding_transcript_variant	MODIFIER	BAZ2B	ENSG00000123636	Transcript	ENST00000482501.5	protein_coding_CDS_not_defined
2_159413336_C/A	2:159413336-159413336	A	intron_variant	MODIFIER	BAZ2B	ENSG00000123636	Transcript	ENST00000392782.5	protein_coding
2_159413336_C/A	2:159413336-159413336	A	intron_variant	MODIFIER	BAZ2B	ENSG00000123636	Transcript	ENST00000392783.7	protein_coding
2_159413336_C/A	2:159413336-159413336	A	intron_variant	MODIFIER	BAZ2B	ENSG00000123636	Transcript	ENST00000441143.1	protein_coding
2_159413336_C/A	2:159413336-159413336	A	intron_variant,non_coding_transcript_variant	MODIFIER	BAZ2B	ENSG00000123636	Transcript	ENST00000472953.1	retained_intron
2_159413336_C/A	2:159413336-159413336	A	intron_variant,non_coding_transcript_variant	MODIFIER	BAZ2B	ENSG00000123636	Transcript	ENST00000482501.5	protein_coding_CDS_not_defined
2_159413622_G/T	2:159413622-159413622	T	intron_variant	MODIFIER	BAZ2B	ENSG00000123636	Transcript	ENST00000392782.5	protein_coding
2_159413622_G/T	2:159413622-159413622	T	intron_variant	MODIFIER	BAZ2B	ENSG00000123636	Transcript	ENST00000392783.7	protein_coding
2_159413622_G/T	2:159413622-159413622	T	intron_variant	MODIFIER	BAZ2B	ENSG00000123636	Transcript	ENST00000441143.1	protein_coding
2_159413622_G/T	2:159413622-159413622	T	intron_variant,non_coding_transcript_variant	MODIFIER	BAZ2B	ENSG00000123636	Transcript	ENST00000472953.1	retained_intron
2_159413622_G/T	2:159413622-159413622	T	intron_variant,non_coding_transcript_variant	MODIFIER	BAZ2B	ENSG00000123636	Transcript	ENST00000482501.5	protein_coding_CDS_not_defined
2_159414347_C/A	2:159414347-159414347	A	intron_variant	MODIFIER	BAZ2B	ENSG00000123636	Transcript	ENST00000392782.5	protein_coding
2_159414347_C/A	2:159414347-159414347	A	intron_variant	MODIFIER	BAZ2B	ENSG00000123636	Transcript	ENST00000392783.7	protein_coding
2_159414347_C/A	2:159414347-159414347	A	intron_variant	MODIFIER	BAZ2B	ENSG00000123636	Transcript	ENST00000441143.1	protein_coding
2_159414347_C/A	2:159414347-159414347	A	intron_variant,non_coding_transcript_variant	MODIFIER	BAZ2B	ENSG00000123636	Transcript	ENST00000472953.1	retained_intron
2_159414347_C/A	2:159414347-159414347	A	intron_variant,non_coding_transcript_variant	MODIFIER	BAZ2B	ENSG00000123636	Transcript	ENST00000482501.5	protein_coding_CDS_not_defined
2_159415239_G/T	2:159415239-159415239	T	intron_variant	MODIFIER	BAZ2B	ENSG00000123636	Transcript	ENST00000392782.5	protein_coding
2_159415239_G/T	2:159415239-159415239	T	intron_variant	MODIFIER	BAZ2B	ENSG00000123636	Transcript	ENST00000392783.7	protein_coding
2_159415239_G/T	2:159415239-159415239	T	intron_variant	MODIFIER	BAZ2B	ENSG00000123636	Transcript	ENST00000441143.1	protein_coding
2_159415239_G/T	2:159415239-159415239	T	intron_variant,non_coding_transcript_variant	MODIFIER	BAZ2B	ENSG00000123636	Transcript	ENST00000472953.1	retained_intron
2_159415239_G/T	2:159415239-159415239	T	intron_variant,non_coding_transcript_variant	MODIFIER	BAZ2B	ENSG00000123636	Transcript	ENST00000482501.5	protein_coding_CDS_not_defined
2_159417333_G/A	2:159417333-159417333	A	intron_variant	MODIFIER	BAZ2B	ENSG00000123636	Transcript	ENST00000392782.5	protein_coding
2_159417333_G/A	2:159417333-159417333	A	intron_variant	MODIFIER	BAZ2B	ENSG00000123636	Transcript	ENST00000392783.7	protein_coding
2_159417333_G/A	2:159417333-159417333	A	intron_variant	MODIFIER	BAZ2B	ENSG00000123636	Transcript	ENST00000441143.1	protein_coding
2_159417333_G/A	2:159417333-159417333	A	intron_variant,non_coding_transcript_variant	MODIFIER	BAZ2B	ENSG00000123636	Transcript	ENST00000472953.1	retained_intron
2_159417333_G/A	2:159417333-159417333	A	intron_variant,non_coding_transcript_variant	MODIFIER	BAZ2B	ENSG00000123636	Transcript	ENST00000482501.5	protein_coding_CDS_not_defined
2_159418933_T/A	2:159418933-159418933	A	intron_variant	MODIFIER	BAZ2B	ENSG00000123636	Transcript	ENST00000392782.5	protein_coding
2_159418933_T/A	2:159418933-159418933	A	intron_variant	MODIFIER	BAZ2B	ENSG00000123636	Transcript	ENST00000392783.7	protein_coding
2_159418933_T/A	2:159418933-159418933	A	intron_variant	MODIFIER	BAZ2B	ENSG00000123636	Transcript	ENST00000441143.1	protein_coding
2_159418933_T/A	2:159418933-159418933	A	intron_variant,non_coding_transcript_variant	MODIFIER	BAZ2B	ENSG00000123636	Transcript	ENST00000472953.1	retained_intron
2_159418933_T/A	2:159418933-159418933	A	intron_variant,non_coding_transcript_variant	MODIFIER	BAZ2B	ENSG00000123636	Transcript	ENST00000482501.5	protein_coding_CDS_not_defined
2_159418935_G/C	2:159418935-159418935	C	intron_variant	MODIFIER	BAZ2B	ENSG00000123636	Transcript	ENST00000392782.5	protein_coding
2_159418935_G/C	2:159418935-159418935	C	intron_variant	MODIFIER	BAZ2B	ENSG00000123636	Transcript	ENST00000392783.7	protein_coding
2_159418935_G/C	2:159418935-159418935	C	intron_variant	MODIFIER	BAZ2B	ENSG00000123636	Transcript	ENST00000441143.1	protein_coding
2_159418935_G/C	2:159418935-159418935	C	intron_variant,non_coding_transcript_variant	MODIFIER	BAZ2B	ENSG00000123636	Transcript	ENST00000472953.1	retained_intron
2_159418935_G/C	2:159418935-159418935	C	intron_variant,non_coding_transcript_variant	MODIFIER	BAZ2B	ENSG00000123636	Transcript	ENST00000482501.5	protein_coding_CDS_not_defined
2_159421836_T/A	2:159421836-159421836	A	intron_variant	MODIFIER	BAZ2B	ENSG00000123636	Transcript	ENST00000392782.5	protein_coding
2_159421836_T/A	2:159421836-159421836	A	intron_variant	MODIFIER	BAZ2B	ENSG00000123636	Transcript	ENST00000392783.7	protein_coding
2_159421836_T/A	2:159421836-159421836	A	intron_variant	MODIFIER	BAZ2B	ENSG00000123636	Transcript	ENST00000441143.1	protein_coding
2_159421836_T/A	2:159421836-159421836	A	intron_variant,non_coding_transcript_variant	MODIFIER	BAZ2B	ENSG00000123636	Transcript	ENST00000472953.1	retained_intron
2_159421836_T/A	2:159421836-159421836	A	upstream_gene_variant	MODIFIER	BAZ2B	ENSG00000123636	Transcript	ENST00000482501.5	protein_coding_CDS_not_defined
2_159422919_C/T	2:159422919-159422919	T	intron_variant	MODIFIER	BAZ2B	ENSG00000123636	Transcript	ENST00000392782.5	protein_coding
2_159422919_C/T	2:159422919-159422919	T	intron_variant	MODIFIER	BAZ2B	ENSG00000123636	Transcript	ENST00000392783.7	protein_coding
2_159422919_C/T	2:159422919-159422919	T	intron_variant	MODIFIER	BAZ2B	ENSG00000123636	Transcript	ENST00000441143.1	protein_coding
2_159422919_C/T	2:159422919-159422919	T	intron_variant,non_coding_transcript_variant	MODIFIER	BAZ2B	ENSG00000123636	Transcript	ENST00000472953.1	retained_intron
2_159422919_C/T	2:159422919-159422919	T	upstream_gene_variant	MODIFIER	BAZ2B	ENSG00000123636	Transcript	ENST00000482501.5	protein_coding_CDS_not_defined
2_159423607_C/T	2:159423607-159423607	T	intron_variant	MODIFIER	BAZ2B	ENSG00000123636	Transcript	ENST00000392782.5	protein_coding
2_159423607_C/T	2:159423607-159423607	T	intron_variant	MODIFIER	BAZ2B	ENSG00000123636	Transcript	ENST00000392783.7	protein_coding
2_159423607_C/T	2:159423607-159423607	T	intron_variant	MODIFIER	BAZ2B	ENSG00000123636	Transcript	ENST00000441143.1	protein_coding
2_159423607_C/T	2:159423607-159423607	T	intron_variant,non_coding_transcript_variant	MODIFIER	BAZ2B	ENSG00000123636	Transcript	ENST00000472953.1	retained_intron
2_159423607_C/T	2:159423607-159423607	T	upstream_gene_variant	MODIFIER	BAZ2B	ENSG00000123636	Transcript	ENST00000482501.5	protein_coding_CDS_not_defined
2_159423792_C/T	2:159423792-159423792	T	intron_variant	MODIFIER	BAZ2B	ENSG00000123636	Transcript	ENST00000392782.5	protein_coding
2_159423792_C/T	2:159423792-159423792	T	intron_variant	MODIFIER	BAZ2B	ENSG00000123636	Transcript	ENST00000392783.7	protein_coding
2_159423792_C/T	2:159423792-159423792	T	intron_variant	MODIFIER	BAZ2B	ENSG00000123636	Transcript	ENST00000441143.1	protein_coding
2_159423792_C/T	2:159423792-159423792	T	intron_variant,non_coding_transcript_variant	MODIFIER	BAZ2B	ENSG00000123636	Transcript	ENST00000472953.1	retained_intron
2_159423792_C/T	2:159423792-159423792	T	upstream_gene_variant	MODIFIER	BAZ2B	ENSG00000123636	Transcript	ENST00000482501.5	protein_coding_CDS_not_defined
2_159423807_C/T	2:159423807-159423807	T	intron_variant	MODIFIER	BAZ2B	ENSG00000123636	Transcript	ENST00000392782.5	protein_coding
2_159423807_C/T	2:159423807-159423807	T	intron_variant	MODIFIER	BAZ2B	ENSG00000123636	Transcript	ENST00000392783.7	protein_coding
2_159423807_C/T	2:159423807-159423807	T	intron_variant	MODIFIER	BAZ2B	ENSG00000123636	Transcript	ENST00000441143.1	protein_coding
2_159423807_C/T	2:159423807-159423807	T	intron_variant,non_coding_transcript_variant	MODIFIER	BAZ2B	ENSG00000123636	Transcript	ENST00000472953.1	retained_intron
2_159423807_C/T	2:159423807-159423807	T	upstream_gene_variant	MODIFIER	BAZ2B	ENSG00000123636	Transcript	ENST00000482501.5	protein_coding_CDS_not_defined
2_159436667_C/T	2:159436667-159436667	T	intron_variant	MODIFIER	BAZ2B	ENSG00000123636	Transcript	ENST00000392782.5	protein_coding
2_159436667_C/T	2:159436667-159436667	T	intron_variant	MODIFIER	BAZ2B	ENSG00000123636	Transcript	ENST00000392783.7	protein_coding
2_159436667_C/T	2:159436667-159436667	T	upstream_gene_variant	MODIFIER	BAZ2B	ENSG00000123636	Transcript	ENST00000441143.1	protein_coding
2_159436667_C/T	2:159436667-159436667	T	downstream_gene_variant	MODIFIER	BAZ2B	ENSG00000123636	Transcript	ENST00000467184.5	retained_intron
2_159436667_C/T	2:159436667-159436667	T	upstream_gene_variant	MODIFIER	BAZ2B	ENSG00000123636	Transcript	ENST00000472953.1	retained_intron
2_159436667_C/T	2:159436667-159436667	T	downstream_gene_variant	MODIFIER	BAZ2B	ENSG00000123636	Transcript	ENST00000482503.5	protein_coding_CDS_not_defined
#Uploaded_variation	Location	Allele	Consequence	IMPACT	SYMBOL	Gene	Feature_type	Feature	BIOTYPE
11_3847049_C/T	11:3847049-3847049	T	intergenic_variant	MODIFIER	-	-	-	-	-
11_3848832_C/A	11:3848832-3848832	A	regulatory_region_variant	MODIFIER	-	-	RegulatoryFeature	ENSR00000262528	CTCF_binding_site
11_3848832_C/A	11:3848832-3848832	A	intergenic_variant	MODIFIER	-	-	-	-	-
11_3892266_G/T	11:3892266-3892266	T	intron_variant	MODIFIER	STIM1	ENSG00000167323	Transcript	ENST00000300737.8	protein_coding
11_3892266_G/T	11:3892266-3892266	T	downstream_gene_variant	MODIFIER	PPIAP40	ENSG00000230593	Transcript	ENST00000448870.1	processed_pseudogene
11_3892266_G/T	11:3892266-3892266	T	intron_variant	MODIFIER	STIM1	ENSG00000167323	Transcript	ENST00000524822.5	protein_coding
11_3892266_G/T	11:3892266-3892266	T	intron_variant	MODIFIER	STIM1	ENSG00000167323	Transcript	ENST00000525403.6	protein_coding
11_3892266_G/T	11:3892266-3892266	T	intron_variant	MODIFIER	STIM1	ENSG00000167323	Transcript	ENST00000526596.2	protein_coding
11_3892266_G/T	11:3892266-3892266	T	intron_variant	MODIFIER	STIM1	ENSG00000167323	Transcript	ENST00000527651.5	protein_coding
11_3892266_G/T	11:3892266-3892266	T	intron_variant	MODIFIER	STIM1	ENSG00000167323	Transcript	ENST00000530554.5	protein_coding
11_3892266_G/T	11:3892266-3892266	T	intron_variant	MODIFIER	STIM1	ENSG00000167323	Transcript	ENST00000532610.5	protein_coding
11_3892266_G/T	11:3892266-3892266	T	intron_variant	MODIFIER	STIM1	ENSG00000167323	Transcript	ENST00000532919.5	protein_coding
11_3892266_G/T	11:3892266-3892266	T	intron_variant,non_coding_transcript_variant	MODIFIER	STIM1	ENSG00000167323	Transcript	ENST00000533343.2	retained_intron
11_3892266_G/T	11:3892266-3892266	T	intron_variant	MODIFIER	STIM1	ENSG00000167323	Transcript	ENST00000616714.4	protein_coding
11_3892266_G/T	11:3892266-3892266	T	intron_variant,non_coding_transcript_variant	MODIFIER	STIM1	ENSG00000167323	Transcript	ENST00000698909.1	retained_intron
11_3892266_G/T	11:3892266-3892266	T	intron_variant	MODIFIER	STIM1	ENSG00000167323	Transcript	ENST00000698910.1	protein_coding
11_3892266_G/T	11:3892266-3892266	T	intron_variant	MODIFIER	STIM1	ENSG00000167323	Transcript	ENST00000698911.1	protein_coding
11_3892266_G/T	11:3892266-3892266	T	intron_variant	MODIFIER	STIM1	ENSG00000167323	Transcript	ENST00000698912.1	protein_coding
11_3892266_G/T	11:3892266-3892266	T	intron_variant	MODIFIER	STIM1	ENSG00000167323	Transcript	ENST00000698913.1	protein_coding
11_3892266_G/T	11:3892266-3892266	T	intron_variant	MODIFIER	STIM1	ENSG00000167323	Transcript	ENST00000698914.1	protein_coding
11_3892266_G/T	11:3892266-3892266	T	intron_variant	MODIFIER	STIM1	ENSG00000167323	Transcript	ENST00000698915.1	protein_coding
11_3892266_G/T	11:3892266-3892266	T	intron_variant	MODIFIER	STIM1	ENSG00000167323	Transcript	ENST00000698916.1	protein_coding
11_3892266_G/T	11:3892266-3892266	T	intron_variant,non_coding_transcript_variant	MODIFIER	STIM1	ENSG00000167323	Transcript	ENST00000698917.1	retained_intron
11_3892266_G/T	11:3892266-3892266	T	intron_variant,NMD_transcript_variant	MODIFIER	STIM1	ENSG00000167323	Transcript	ENST00000698918.1	nonsense_mediated_decay
11_3892266_G/T	11:3892266-3892266	T	intron_variant,NMD_transcript_variant	MODIFIER	STIM1	ENSG00000167323	Transcript	ENST00000698919.1	nonsense_mediated_decay
