# Supplementary material for: Novel risk loci for COVID-19 hospitalization among admixed American populations
Source: eLife. 2024 Oct 3;13:RP93666. doi: 10.7554/eLife.93666 (PMC11449485; doi:10.7554/eLife.93666)
Supplement: Supplementary file 8. — Shaded in green, the prioritized gene by the V2G score. [file elife-93666-supp8.xlsx]

## Sheet: Supplementary Table 8.
Supplementary Table 8. V2G scores for the variants included in the fine-mapped credible sets in the novel risk loci from chromosomes 2 and 16 (hg38). Shaded in green, the prioritized gene by the V2G score.
variant	overallScore	gene.id	gene.symbol
2_159440061_C_T	0.2334	ENSG00000123636	BAZ2B
2_159440134_C_T	0.2334	ENSG00000123636	BAZ2B
2_159423792_C_T	0.226761	ENSG00000123636	BAZ2B
2_159423807_C_T	0.226761	ENSG00000123636	BAZ2B
2_159435409_G_A	0.226761	ENSG00000123636	BAZ2B
2_159436422_C_T	0.226761	ENSG00000123636	BAZ2B
2_159436667_C_T	0.226761	ENSG00000123636	BAZ2B
2_159388577_T_A	0.199396	ENSG00000123636	BAZ2B
2_159417333_G_A	0.193561	ENSG00000123636	BAZ2B
2_159418933_T_A	0.193561	ENSG00000123636	BAZ2B
2_159418935_G_C	0.193561	ENSG00000123636	BAZ2B
2_159425695_C_T	0.193561	ENSG00000123636	BAZ2B
2_159425829_G_T	0.193561	ENSG00000123636	BAZ2B
2_159428549_C_T	0.193561	ENSG00000123636	BAZ2B
2_159413336_C_A	0.192757	ENSG00000123636	BAZ2B
2_159414347_C_A	0.192757	ENSG00000123636	BAZ2B
2_159415239_G_T	0.192757	ENSG00000123636	BAZ2B
2_159401859_C_T	0.179477	ENSG00000123636	BAZ2B
2_159406182_C_T	0.179477	ENSG00000123636	BAZ2B
2_159379487_C_T	0.172837	ENSG00000123636	BAZ2B
2_159398147_G_A	0.166197	ENSG00000123636	BAZ2B
2_159409009_G_A	0.166197	ENSG00000123636	BAZ2B
2_159401859_C_T	0.15996	ENSG00000241399	CD302
2_159413336_C_A	0.159759	ENSG00000241399	CD302
2_159414347_C_A	0.159759	ENSG00000241399	CD302
2_159376456_G_A	0.159557	ENSG00000123636	BAZ2B
2_159379656_G_C	0.159557	ENSG00000123636	BAZ2B
2_159387694_G_A	0.159557	ENSG00000123636	BAZ2B
2_159379487_C_T	0.159356	ENSG00000196151	WDSUB1
2_159351605_C_T	0.153521	ENSG00000123636	BAZ2B
2_159401859_C_T	0.15332	ENSG00000054219	LY75
2_159406182_C_T	0.15332	ENSG00000054219	LY75
2_159406182_C_T	0.15332	ENSG00000241399	CD302
2_159386672_T_A	0.146278	ENSG00000123636	BAZ2B
2_159362240_C_A	0.146076	ENSG00000196151	WDSUB1
2_159388577_T_A	0.146076	ENSG00000196151	WDSUB1
2_159366873_G_C	0.139638	ENSG00000123636	BAZ2B
2_159388577_T_A	0.139437	ENSG00000241399	CD302
2_159398147_G_A	0.139437	ENSG00000241399	CD302
2_159409009_G_A	0.133199	ENSG00000241399	CD302
2_159362240_C_A	0.132998	ENSG00000123636	BAZ2B
2_159366873_G_C	0.132797	ENSG00000196151	WDSUB1
2_159376456_G_A	0.132797	ENSG00000196151	WDSUB1
2_159379656_G_C	0.132797	ENSG00000196151	WDSUB1
2_159386672_T_A	0.132797	ENSG00000196151	WDSUB1
2_159387694_G_A	0.132797	ENSG00000196151	WDSUB1
2_159398147_G_A	0.132797	ENSG00000196151	WDSUB1
2_159415239_G_T	0.132797	ENSG00000241399	CD302
2_159382217_C_T	0.126962	ENSG00000123636	BAZ2B
2_159409009_G_A	0.11992	ENSG00000054219	LY75
2_159413336_C_A	0.11992	ENSG00000054219	LY75
2_159414347_C_A	0.11992	ENSG00000054219	LY75
2_159376456_G_A	0.119517	ENSG00000241399	CD302
2_159379487_C_T	0.119517	ENSG00000241399	CD302
2_159379656_G_C	0.119517	ENSG00000241399	CD302
2_159386672_T_A	0.119517	ENSG00000241399	CD302
2_159387694_G_A	0.119517	ENSG00000241399	CD302
2_159393627_TC_T	0.119517	ENSG00000196151	WDSUB1
2_159393629_T_A	0.119517	ENSG00000196151	WDSUB1
2_159401859_C_T	0.119517	ENSG00000196151	WDSUB1
2_159406182_C_T	0.119517	ENSG00000196151	WDSUB1
2_159362240_C_A	0.0995976	ENSG00000241399	CD302
2_159366873_G_C	0.0995976	ENSG00000241399	CD302
2_159360569_C_CACTG	0.0935614	ENSG00000123636	BAZ2B
2_159393627_TC_T	0.0933602	ENSG00000054219	LY75
2_159393629_T_A	0.0933602	ENSG00000054219	LY75
2_159391779_GAT_G	0.0865191	ENSG00000054219	LY75
2_159415239_G_T	0.0863179	ENSG00000196151	WDSUB1
2_159379487_C_T	0.0796781	ENSG00000054219	LY75
2_159413336_C_A	0.0796781	ENSG00000136536	MARCHF7
2_159414347_C_A	0.0796781	ENSG00000136536	MARCHF7
2_159415239_G_T	0.0796781	ENSG00000136536	MARCHF7
2_159423792_C_T	0.0796781	ENSG00000136536	MARCHF7
2_159423807_C_T	0.0796781	ENSG00000136536	MARCHF7
2_159393627_TC_T	0.0734406	ENSG00000241399	CD302
2_159393629_T_A	0.0734406	ENSG00000241399	CD302
2_159388577_T_A	0.0730382	ENSG00000136536	MARCHF7
2_159440061_C_T	0.0730382	ENSG00000136536	MARCHF7
2_159440134_C_T	0.0730382	ENSG00000136536	MARCHF7
2_159362240_C_A	0.0663984	ENSG00000054219	LY75
2_159366873_G_C	0.0663984	ENSG00000054219	LY75
2_159376456_G_A	0.0663984	ENSG00000054219	LY75
2_159379656_G_C	0.0663984	ENSG00000054219	LY75
2_159386672_T_A	0.0663984	ENSG00000054219	LY75
2_159387694_G_A	0.0663984	ENSG00000054219	LY75
2_159388577_T_A	0.0663984	ENSG00000054219	LY75
2_159391779_GAT_G	0.0663984	ENSG00000196151	WDSUB1
2_159398147_G_A	0.0663984	ENSG00000054219	LY75
2_159401859_C_T	0.0663984	ENSG00000136536	MARCHF7
2_159409009_G_A	0.0663984	ENSG00000196151	WDSUB1
2_159415239_G_T	0.0663984	ENSG00000054219	LY75
2_159435409_G_A	0.0663984	ENSG00000136536	MARCHF7
2_159436422_C_T	0.0663984	ENSG00000136536	MARCHF7
2_159436667_C_T	0.0663984	ENSG00000136536	MARCHF7
2_159393627_TC_T	0.0599598	ENSG00000123636	BAZ2B
2_159393629_T_A	0.0599598	ENSG00000123636	BAZ2B
2_159351605_C_T	0.0597586	ENSG00000196151	WDSUB1
2_159360569_C_CACTG	0.0597586	ENSG00000196151	WDSUB1
2_159366873_G_C	0.0597586	ENSG00000136536	MARCHF7
2_159382217_C_T	0.0597586	ENSG00000136536	MARCHF7
2_159413336_C_A	0.0597586	ENSG00000196151	WDSUB1
2_159417333_G_A	0.0597586	ENSG00000136536	MARCHF7
2_159418933_T_A	0.0597586	ENSG00000136536	MARCHF7
2_159418935_G_C	0.0597586	ENSG00000136536	MARCHF7
2_159435409_G_A	0.0597586	ENSG00000054219	LY75
2_159436422_C_T	0.0597586	ENSG00000054219	LY75
2_159436667_C_T	0.0597586	ENSG00000054219	LY75
2_159440061_C_T	0.0597586	ENSG00000054219	LY75
2_159440134_C_T	0.0597586	ENSG00000054219	LY75
2_159391779_GAT_G	0.0533199	ENSG00000241399	CD302
2_159391779_GAT_G	0.0533199	ENSG00000123636	BAZ2B
2_159382217_C_T	0.0531187	ENSG00000196151	WDSUB1
2_159386672_T_A	0.0531187	ENSG00000136536	MARCHF7
2_159387694_G_A	0.0531187	ENSG00000136536	MARCHF7
2_159391779_GAT_G	0.0531187	ENSG00000153246	PLA2R1
2_159393627_TC_T	0.0531187	ENSG00000153246	PLA2R1
2_159393629_T_A	0.0531187	ENSG00000153246	PLA2R1
2_159401859_C_T	0.0531187	ENSG00000153246	PLA2R1
2_159406182_C_T	0.0531187	ENSG00000153246	PLA2R1
2_159413336_C_A	0.0531187	ENSG00000153246	PLA2R1
2_159414347_C_A	0.0531187	ENSG00000153246	PLA2R1
2_159415239_G_T	0.0531187	ENSG00000153246	PLA2R1
2_159417333_G_A	0.0531187	ENSG00000054219	LY75
2_159418933_T_A	0.0531187	ENSG00000054219	LY75
2_159418935_G_C	0.0531187	ENSG00000054219	LY75
2_159423792_C_T	0.0531187	ENSG00000054219	LY75
2_159423807_C_T	0.0531187	ENSG00000054219	LY75
2_159425695_C_T	0.0531187	ENSG00000054219	LY75
2_159425829_G_T	0.0531187	ENSG00000054219	LY75
2_159428549_C_T	0.0531187	ENSG00000054219	LY75
2_159414347_C_A	0.0464789	ENSG00000196151	WDSUB1
2_159417333_G_A	0.0464789	ENSG00000196151	WDSUB1
2_159418933_T_A	0.0464789	ENSG00000196151	WDSUB1
2_159418935_G_C	0.0464789	ENSG00000196151	WDSUB1
2_159423792_C_T	0.0464789	ENSG00000196151	WDSUB1
2_159423807_C_T	0.0464789	ENSG00000196151	WDSUB1
2_159425695_C_T	0.0464789	ENSG00000196151	WDSUB1
2_159425829_G_T	0.0464789	ENSG00000196151	WDSUB1
2_159428549_C_T	0.0464789	ENSG00000196151	WDSUB1
2_159435409_G_A	0.0464789	ENSG00000196151	WDSUB1
2_159436422_C_T	0.0464789	ENSG00000196151	WDSUB1
2_159436667_C_T	0.0464789	ENSG00000196151	WDSUB1
2_159440061_C_T	0.0464789	ENSG00000196151	WDSUB1
2_159440134_C_T	0.0464789	ENSG00000196151	WDSUB1
2_159376456_G_A	0.039839	ENSG00000153246	PLA2R1
2_159379487_C_T	0.039839	ENSG00000153246	PLA2R1
2_159386672_T_A	0.039839	ENSG00000153246	PLA2R1
2_159387694_G_A	0.039839	ENSG00000153246	PLA2R1
2_159388577_T_A	0.039839	ENSG00000153246	PLA2R1
2_159391779_GAT_G	0.039839	ENSG00000136536	MARCHF7
2_159393627_TC_T	0.039839	ENSG00000136536	MARCHF7
2_159393629_T_A	0.039839	ENSG00000136536	MARCHF7
2_159398147_G_A	0.039839	ENSG00000136536	MARCHF7
2_159398147_G_A	0.039839	ENSG00000153246	PLA2R1
2_159409009_G_A	0.039839	ENSG00000153246	PLA2R1
2_159379656_G_C	0.0265594	ENSG00000153246	PLA2R1
2_159382217_C_T	0.0265594	ENSG00000054219	LY75
2_159406182_C_T	0.0265594	ENSG00000136536	MARCHF7
2_159409009_G_A	0.0265594	ENSG00000136536	MARCHF7
2_159425695_C_T	0.0265594	ENSG00000136536	MARCHF7
2_159425829_G_T	0.0265594	ENSG00000136536	MARCHF7
2_159428549_C_T	0.0265594	ENSG00000136536	MARCHF7
2_159435409_G_A	0.0265594	ENSG00000153246	PLA2R1
2_159436422_C_T	0.0265594	ENSG00000153246	PLA2R1
2_159440061_C_T	0.0265594	ENSG00000241399	CD302
2_159440134_C_T	0.0265594	ENSG00000241399	CD302
2_159351605_C_T	0.0199195	ENSG00000136536	MARCHF7
2_159360569_C_CACTG	0.0199195	ENSG00000136536	MARCHF7
2_159362240_C_A	0.0199195	ENSG00000136536	MARCHF7
2_159376456_G_A	0.0199195	ENSG00000136536	MARCHF7
2_159379487_C_T	0.0199195	ENSG00000136536	MARCHF7
2_159379656_G_C	0.0199195	ENSG00000136536	MARCHF7
2_159423792_C_T	0.0199195	ENSG00000241399	CD302
2_159423807_C_T	0.0199195	ENSG00000241399	CD302
2_159425695_C_T	0.0199195	ENSG00000241399	CD302
2_159425829_G_T	0.0199195	ENSG00000241399	CD302
2_159428549_C_T	0.0199195	ENSG00000241399	CD302
2_159435409_G_A	0.0199195	ENSG00000241399	CD302
2_159436422_C_T	0.0199195	ENSG00000241399	CD302
2_159436667_C_T	0.0199195	ENSG00000241399	CD302
2_84064043_G_T	0.0132797	ENSG00000163541	SUCLG1
2_159351605_C_T	0.0132797	ENSG00000054219	LY75
2_159351605_C_T	0.0132797	ENSG00000115183	TANC1
2_159360569_C_CACTG	0.0132797	ENSG00000115183	TANC1
2_159362240_C_A	0.0132797	ENSG00000115183	TANC1
2_159366873_G_C	0.0132797	ENSG00000115183	TANC1
2_159376456_G_A	0.0132797	ENSG00000115183	TANC1
2_159379487_C_T	0.0132797	ENSG00000115183	TANC1
2_159379656_G_C	0.0132797	ENSG00000115183	TANC1
2_159382217_C_T	0.0132797	ENSG00000241399	CD302
2_159382217_C_T	0.0132797	ENSG00000115183	TANC1
2_159386672_T_A	0.0132797	ENSG00000115183	TANC1
2_159387694_G_A	0.0132797	ENSG00000115183	TANC1
2_159388577_T_A	0.0132797	ENSG00000115183	TANC1
2_159391779_GAT_G	0.0132797	ENSG00000115183	TANC1
2_159417333_G_A	0.0132797	ENSG00000241399	CD302
2_159417333_G_A	0.0132797	ENSG00000153246	PLA2R1
2_159418933_T_A	0.0132797	ENSG00000241399	CD302
2_159418933_T_A	0.0132797	ENSG00000153246	PLA2R1
2_159418935_G_C	0.0132797	ENSG00000241399	CD302
2_159418935_G_C	0.0132797	ENSG00000153246	PLA2R1
2_159423792_C_T	0.0132797	ENSG00000153246	PLA2R1
2_159423807_C_T	0.0132797	ENSG00000153246	PLA2R1
2_159425695_C_T	0.0132797	ENSG00000153246	PLA2R1
2_159425829_G_T	0.0132797	ENSG00000153246	PLA2R1
2_159428549_C_T	0.0132797	ENSG00000153246	PLA2R1
2_159436667_C_T	0.0132797	ENSG00000153246	PLA2R1
2_159440061_C_T	0.0132797	ENSG00000153246	PLA2R1
2_159440134_C_T	0.0132797	ENSG00000153246	PLA2R1
2_84064043_G_T	0.00663984	ENSG00000115423	DNAH6
2_159351605_C_T	0.00663984	ENSG00000241399	CD302
2_159360569_C_CACTG	0.00663984	ENSG00000241399	CD302
2_159393627_TC_T	0.00663984	ENSG00000115183	TANC1
2_159393629_T_A	0.00663984	ENSG00000115183	TANC1
2_159398147_G_A	0.00663984	ENSG00000115183	TANC1
2_159401859_C_T	0.00663984	ENSG00000115183	TANC1
2_159406182_C_T	0.00663984	ENSG00000115183	TANC1
2_159409009_G_A	0.00663984	ENSG00000115183	TANC1
2_159413336_C_A	0.00663984	ENSG00000115183	TANC1
2_159414347_C_A	0.00663984	ENSG00000115183	TANC1
2_159415239_G_T	0.00663984	ENSG00000115183	TANC1
2_159417333_G_A	0.00663984	ENSG00000115183	TANC1
2_159418933_T_A	0.00663984	ENSG00000115183	TANC1
2_159418935_G_C	0.00663984	ENSG00000115183	TANC1
2_159423792_C_T	0.00663984	ENSG00000115183	TANC1
2_159423807_C_T	0.00663984	ENSG00000115183	TANC1
2_159425695_C_T	0.00663984	ENSG00000115183	TANC1
2_159425829_G_T	0.00663984	ENSG00000115183	TANC1
2_159428549_C_T	0.00663984	ENSG00000115183	TANC1
2_159435409_G_A	0.00663984	ENSG00000115183	TANC1
2_159435409_G_A	0.00663984	ENSG00000248672	LY75-CD302
2_159436422_C_T	0.00663984	ENSG00000115183	TANC1
2_159436422_C_T	0.00663984	ENSG00000248672	LY75-CD302
2_159436667_C_T	0.00663984	ENSG00000115183	TANC1
2_159436667_C_T	0.00663984	ENSG00000248672	LY75-CD302
2_159440061_C_T	0.00663984	ENSG00000115183	TANC1
2_159440061_C_T	0.00663984	ENSG00000248672	LY75-CD302
2_159440134_C_T	0.00663984	ENSG00000115183	TANC1
2_159440134_C_T	0.00663984	ENSG00000248672	LY75-CD302
2_159406182_C_T	0	ENSG00000248672	LY75-CD302
2_159409009_G_A	0	ENSG00000248672	LY75-CD302
2_159413336_C_A	0	ENSG00000248672	LY75-CD302
2_159414347_C_A	0	ENSG00000248672	LY75-CD302
2_159415239_G_T	0	ENSG00000248672	LY75-CD302
2_159417333_G_A	0	ENSG00000248672	LY75-CD302
2_159418933_T_A	0	ENSG00000248672	LY75-CD302
2_159418935_G_C	0	ENSG00000248672	LY75-CD302
2_159423792_C_T	0	ENSG00000248672	LY75-CD302
2_159423807_C_T	0	ENSG00000248672	LY75-CD302
2_159425695_C_T	0	ENSG00000248672	LY75-CD302
2_159425829_G_T	0	ENSG00000248672	LY75-CD302
2_159428549_C_T	0	ENSG00000248672	LY75-CD302
16_3746764_G_T	0.0997988	ENSG00000005339	CREBBP
16_3808346_T_A	0.0798793	ENSG00000005339	CREBBP
16_3847049_C_T	0.0798793	ENSG00000005339	CREBBP
16_3787893_G_C	0.0732394	ENSG00000005339	CREBBP
16_3801400_C_T	0.0732394	ENSG00000005339	CREBBP
16_3891469_C_A	0.0663984	ENSG00000005339	CREBBP
16_3892266_G_T	0.0663984	ENSG00000005339	CREBBP
16_3746764_G_T	0.0597586	ENSG00000126602	TRAP1
16_3787893_G_C	0.0597586	ENSG00000126602	TRAP1
16_3801400_C_T	0.0531187	ENSG00000126602	TRAP1
16_3808346_T_A	0.0531187	ENSG00000126602	TRAP1
16_3746764_G_T	0.0464789	ENSG00000213918	DNASE1
16_3746764_G_T	0.0464789	ENSG00000188827	SLX4
16_3746764_G_T	0.0464789	ENSG00000167984	NLRC3
16_3847049_C_T	0.0464789	ENSG00000126602	TRAP1
16_3891469_C_A	0.0464789	ENSG00000126602	TRAP1
16_3787893_G_C	0.039839	ENSG00000213918	DNASE1
16_3787893_G_C	0.039839	ENSG00000188827	SLX4
16_3787893_G_C	0.039839	ENSG00000167984	NLRC3
16_3801400_C_T	0.039839	ENSG00000213918	DNASE1
16_3801400_C_T	0.039839	ENSG00000188827	SLX4
16_3801400_C_T	0.039839	ENSG00000167984	NLRC3
16_3808346_T_A	0.039839	ENSG00000213918	DNASE1
16_3808346_T_A	0.039839	ENSG00000188827	SLX4
16_3892266_G_T	0.039839	ENSG00000126602	TRAP1
16_3892266_G_T	0.039839	ENSG00000162104	ADCY9
16_3746764_G_T	0.0331992	ENSG00000215131	C16orf90
16_3746764_G_T	0.0331992	ENSG00000103351	CLUAP1
16_3808346_T_A	0.0331992	ENSG00000167984	NLRC3
16_3847049_C_T	0.0331992	ENSG00000213918	DNASE1
16_3847049_C_T	0.0331992	ENSG00000162104	ADCY9
16_3847049_C_T	0.0331992	ENSG00000188827	SLX4
16_3847049_C_T	0.0331992	ENSG00000167984	NLRC3
16_3891469_C_A	0.0331992	ENSG00000162104	ADCY9
16_3746764_G_T	0.0265594	ENSG00000167981	ZNF597
16_3746764_G_T	0.0265594	ENSG00000122390	NAA60
16_3787893_G_C	0.0265594	ENSG00000215131	C16orf90
16_3787893_G_C	0.0265594	ENSG00000103351	CLUAP1
16_3801400_C_T	0.0265594	ENSG00000215131	C16orf90
16_3801400_C_T	0.0265594	ENSG00000103351	CLUAP1
16_3801400_C_T	0.0265594	ENSG00000162104	ADCY9
16_3808346_T_A	0.0265594	ENSG00000215131	C16orf90
16_3808346_T_A	0.0265594	ENSG00000103351	CLUAP1
16_3808346_T_A	0.0265594	ENSG00000162104	ADCY9
16_3891469_C_A	0.0265594	ENSG00000213918	DNASE1
16_3891469_C_A	0.0265594	ENSG00000188827	SLX4
16_3891469_C_A	0.0265594	ENSG00000167984	NLRC3
16_3892266_G_T	0.0265594	ENSG00000213918	DNASE1
16_3892266_G_T	0.0265594	ENSG00000188827	SLX4
16_3892266_G_T	0.0265594	ENSG00000167984	NLRC3
16_3746764_G_T	0.0199195	ENSG00000140987	ZSCAN32
16_3746764_G_T	0.0199195	ENSG00000103343	ZNF174
16_3746764_G_T	0.0199195	ENSG00000162104	ADCY9
16_3787893_G_C	0.0199195	ENSG00000167981	ZNF597
16_3787893_G_C	0.0199195	ENSG00000162104	ADCY9
16_3787893_G_C	0.0199195	ENSG00000122390	NAA60
16_3801400_C_T	0.0199195	ENSG00000167981	ZNF597
16_3801400_C_T	0.0199195	ENSG00000122390	NAA60
16_3808346_T_A	0.0199195	ENSG00000167981	ZNF597
16_3808346_T_A	0.0199195	ENSG00000122390	NAA60
16_3847049_C_T	0.0199195	ENSG00000215131	C16orf90
16_3847049_C_T	0.0199195	ENSG00000103351	CLUAP1
16_3891469_C_A	0.0199195	ENSG00000185739	SRL
16_3892266_G_T	0.0199195	ENSG00000185739	SRL
16_3746764_G_T	0.0132797	ENSG00000168158	OR2C1
16_3787893_G_C	0.0132797	ENSG00000140987	ZSCAN32
16_3787893_G_C	0.0132797	ENSG00000103343	ZNF174
16_3801400_C_T	0.0132797	ENSG00000140987	ZSCAN32
16_3801400_C_T	0.0132797	ENSG00000103343	ZNF174
16_3808346_T_A	0.0132797	ENSG00000140987	ZSCAN32
16_3808346_T_A	0.0132797	ENSG00000103343	ZNF174
16_3847049_C_T	0.0132797	ENSG00000167981	ZNF597
16_3847049_C_T	0.0132797	ENSG00000185739	SRL
16_3847049_C_T	0.0132797	ENSG00000122390	NAA60
16_3891469_C_A	0.0132797	ENSG00000215131	C16orf90
16_3891469_C_A	0.0132797	ENSG00000126603	GLIS2
16_3891469_C_A	0.0132797	ENSG00000103351	CLUAP1
16_3891469_C_A	0.0132797	ENSG00000090447	TFAP4
16_3892266_G_T	0.0132797	ENSG00000215131	C16orf90
16_3892266_G_T	0.0132797	ENSG00000126603	GLIS2
16_3892266_G_T	0.0132797	ENSG00000103351	CLUAP1
16_3892266_G_T	0.0132797	ENSG00000090447	TFAP4
16_3746764_G_T	0.00663984	ENSG00000162086	ZNF75A
16_3746764_G_T	0.00663984	ENSG00000140993	TIGD7
16_3787893_G_C	0.00663984	ENSG00000185739	SRL
16_3787893_G_C	0.00663984	ENSG00000168158	OR2C1
16_3801400_C_T	0.00663984	ENSG00000185739	SRL
16_3801400_C_T	0.00663984	ENSG00000090447	TFAP4
16_3801400_C_T	0.00663984	ENSG00000168158	OR2C1
16_3808346_T_A	0.00663984	ENSG00000185739	SRL
16_3808346_T_A	0.00663984	ENSG00000090447	TFAP4
16_3808346_T_A	0.00663984	ENSG00000168158	OR2C1
16_3847049_C_T	0.00663984	ENSG00000140987	ZSCAN32
16_3847049_C_T	0.00663984	ENSG00000103343	ZNF174
16_3847049_C_T	0.00663984	ENSG00000126603	GLIS2
16_3847049_C_T	0.00663984	ENSG00000090447	TFAP4
16_3891469_C_A	0.00663984	ENSG00000167981	ZNF597
16_3891469_C_A	0.00663984	ENSG00000217930	PAM16
16_3891469_C_A	0.00663984	ENSG00000122390	NAA60
16_3892266_G_T	0.00663984	ENSG00000167981	ZNF597
16_3892266_G_T	0.00663984	ENSG00000217930	PAM16
16_3892266_G_T	0.00663984	ENSG00000122390	NAA60
16_3746764_G_T	0	ENSG00000103313	MEFV
16_3746764_G_T	0	ENSG00000168124	OR1F1
16_3746764_G_T	0	ENSG00000185739	SRL
16_3746764_G_T	0	ENSG00000006194	ZNF263
16_3787893_G_C	0	ENSG00000217930	PAM16
16_3787893_G_C	0	ENSG00000090447	TFAP4
16_3787893_G_C	0	ENSG00000162086	ZNF75A
16_3787893_G_C	0	ENSG00000140993	TIGD7
16_3801400_C_T	0	ENSG00000162086	ZNF75A
16_3801400_C_T	0	ENSG00000140993	TIGD7
16_3847049_C_T	0	ENSG00000168158	OR2C1
16_3891469_C_A	0	ENSG00000140987	ZSCAN32
16_3891469_C_A	0	ENSG00000168140	VASN
16_3891469_C_A	0	ENSG00000103343	ZNF174
16_3892266_G_T	0	ENSG00000140987	ZSCAN32
16_3892266_G_T	0	ENSG00000168140	VASN
16_3892266_G_T	0	ENSG00000103343	ZNF174
