# Supplementary material for: Novel risk loci for COVID-19 hospitalization among admixed American populations
Source: eLife. 2024 Oct 3;13:RP93666. doi: 10.7554/eLife.93666 (PMC11449485; doi:10.7554/eLife.93666)
Supplement: Supplementary file 9. — N: number of tissues available for the gene; n_indep: number of independent components of variation kept among the tissues' predictions; p_i_best: best p-value of single tissue S-prediXcan association; t_i_best: name of best single tissue S-prediXcan association; p_i_worst: worst p-value of single tissue S-prediXcan association; t_i_worst: name of worst single tissue S-prediXcan association; eigen_max: eigenvalue of the top independent component in the SVD decomposition of predicted expression correlation; eigen_min: eigenvalue of the last independent component in the SVD decomposition of predicted expression correlation; eigen_min_kept: eigenvalue of the smallest independent component that was kept in the SVD decomposition of predicted expression correlation; z_min: minimum z-score among single-tissue S-prediXcan associations; z_max: maximum z-score among single-tissue S-prediXcan associations; z_mean: mean z-score among single tissue S-prediXcan associations; z_sd: standard deviation of the mean z-score among single-tissue S-prediXcan associations; tmi: trace of T*T', where T is the correlation of predicted expression levels for different tissues multiplied by its SVD pseudo-inverse and is an estimate for the number of independent components of variation in predicted expression across tissues. [file elife-93666-supp9.xlsx]

## Sheet: Supplementary Table 9.
Supplementary Table 9. MultiXcan results for the SC-HGI_AMR GWAS meta-analysis. N: number of tissues available for the gene; n_indep: number of independet components of variation kept amont the tissues' predictions; p_i_best: best p-value of single tissue S-prediXcan association; t_i_best: name of best single tissue S-prediXcan association; p_i_worst: worst p-value of single tissue S-prediXcan as…
gene	gene_name	pvalue	n	n_indep	p_i_best	t_i_best	p_i_worst	t_i_worst	eigen_max	eigen_min	eigen_min_kept	z_min	z_max	z_mean	z_sd	tmi
ENSG00000163817.15	SLC6A20	2.67434e-15	33	5	4.54216e-16	Muscle_Skeletal	0.466474	Pancreas	19.1054	6.61478e-16	0.871829	0.728227	8.12316	3.08358	1.52909	5
ENSG00000173585.15	CCR9	7.17507e-15	7	6	1.45e-16	Whole_Blood	0.953252	Nerve_Tibial	3.35472	0.00147328	0.112854	0.0586241	8.26055	3.69747	2.894	6
ENSG00000273102.1	AP000569.9	2.55749e-11	3	3	0.0008774	Cells_EBV-transformed_lymphocytes	0.2706	Spleen	2.02564	0.197712	0.197712	-3.32715	1.10168	-1.57242	2.3532	3
ENSG00000173473.10	SMARCC1	2.96793e-09	23	3	0.0004378	Brain_Hippocampus	0.9428	Brain_Frontal_Cortex_BA9	15.7544	1.23326e-17	1.0643	-3.51618	3.3336	-0.510199	1.88586	3
ENSG00000172215.5	CXCR6	1.33483e-08	38	4	2.92299e-10	Adipose_Visceral_Omentum	0.857755	Spleen	16.4694	1.49471e-15	3.05258	-6.30281	2.38879	-2.36171	2.50353	4
ENSG00000163818.16	LZTFL1	3.42004e-08	45	5	6.11565e-11	Thyroid	0.9491	Brain_Amygdala	22.0018	7.17311e-16	0.786369	-2.00782	6.54088	-0.483936	2.16463	5
ENSG00000164047.4	CAMP	4.03838e-08	19	4	0.05167	Adipose_Subcutaneous	0.5124	Skin_Not_Sun_Exposed_Suprapubic	13.8308	4.90626e-18	0.581168	-1.94587	1.00388	-0.0780434	1.19515	4
ENSG00000162623.15	TYW3	4.29858e-08	49	4	0.01097	Brain_Hippocampus	0.967033	Colon_Transverse	29.2813	2.13416e-15	1.10182	-2.54365	2.34396	-0.914901	1.11533	4
ENSG00000137166.14	FOXP4	1.95225e-07	28	4	4.482e-05	Lung	0.903209	Esophagus_Mucosa	22.7194	1.41035e-15	0.989877	-2.35949	4.08112	0.511546	1.31821	4
ENSG00000163221.8	S100A12	1.0799e-06	13	4	0.06907	Testis	0.8996	Breast_Mammary_Tissue	10.3946	4.04558e-17	0.413887	-1.81796	1.5086	0.0284891	1.1704	4
ENSG00000147454.13	SLC25A37	1.09311e-06	33	8	1.07616e-06	Cells_EBV-transformed_lymphocytes	0.8195	Pituitary	16.1802	1.55466e-15	0.695724	-3.39194	4.87718	-0.487585	2.33642	8
ENSG00000163820.14	FYCO1	1.29337e-06	47	5	3.03804e-06	Brain_Hippocampus	0.977726	Small_Intestine_Terminal_Ileum	23.19	2.23869e-15	0.827099	-2.21195	4.66823	0.658013	1.7502	5
ENSG00000173578.7	XCR1	1.75699e-06	23	4	0.00029713	Small_Intestine_Terminal_Ileum	0.964806	Esophagus_Muscularis	13.7522	1.79064e-17	0.939968	-3.46875	3.61779	0.343653	1.77529	4
ENSG00000100030.14	MAPK1	2.93973e-06	40	3	0.000179754	Heart_Left_Ventricle	0.87113	Testis	29.7872	7.67925e-16	2.07973	-3.74589	2.8009	-0.548436	1.50148	3
ENSG00000241837.6	ATP5O	3.01941e-06	47	3	2.97365e-07	Skin_Not_Sun_Exposed_Suprapubic	0.145017	Brain_Cerebellum	37.5848	1.0443e-15	2.85473	1.45736	5.12511	3.24564	0.925426	3
ENSG00000152670.18	DDX4	4.28109e-06	12	3	0.1001	Testis	0.715657	Brain_Hypothalamus	8.781	1.60547e-17	0.476928	-1.52244	1.64437	0.307757	1.16329	3
ENSG00000134108.12	ARL8B	5.38741e-06	24	5	8.497e-05	Brain_Amygdala	0.7384	Colon_Sigmoid	17.117	4.79679e-18	0.615644	-3.92993	3.92993	-0.33462	1.59931	5
ENSG00000058668.14	ATP2B4	6.34541e-06	36	6	4.83122e-07	Colon_Transverse	0.876894	Esophagus_Mucosa	23.8874	7.40886e-16	0.825685	-2.27011	5.0329	0.544508	2.24412	6
ENSG00000111203.11	ITFG2	8.01461e-06	38	3	0.0202913	Esophagus_Mucosa	0.343861	Brain_Hypothalamus	30.3409	1.33401e-15	1.02484	-2.32092	1.90265	1.2586	0.9655	3
ENSG00000171109.18	MFN1	8.05569e-06	49	4	1.11327e-05	Whole_Blood	0.4525	Brain_Spinal_cord_cervical_c-1	39.5851	2.01572e-15	1.78576	0.751254	4.39392	2.29246	1.02276	4
ENSG00000159110.19	IFNAR2	1.08265e-05	48	7	3.18584e-07	Esophagus_Mucosa	0.912577	Whole_Blood	18.6753	6.91236e-16	1.17557	-5.11211	4.4038	-1.41701	2.43774	7
ENSG00000103671.9	TRIP4	1.16415e-05	45	2	0.0007316	Brain_Anterior_cingulate_cortex_BA24	0.9426	Heart_Atrial_Appendage	41.1006	1.94603e-15	3.62045	0.0720024	3.37745	1.23709	1.27576	2
ENSG00000173171.14	MTX1	1.23857e-05	36	2	0.0004788	Artery_Aorta	0.402483	Heart_Atrial_Appendage	31.647	2.38452e-15	3.34904	-2.11818	3.49234	2.69892	1.64484	2
ENSG00000138678.10	GPAT3	1.77417e-05	12	6	0.004716	Heart_Atrial_Appendage	0.4706	Skin_Not_Sun_Exposed_Suprapubic	5.76373	2.23429e-16	0.320243	-2.82582	2.65314	0.624776	1.63375	6
ENSG00000166831.8	RBPMS2	1.89883e-05	48	2	1.11173e-05	Uterus	0.899345	Brain_Frontal_Cortex_BA9	35.7081	7.33702e-16	12.07	-4.39422	3.96551	-1.00282	3.48107	2
ENSG00000185499.16	MUC1	2.19913e-05	31	5	6.8101e-06	Brain_Cerebellar_Hemisphere	0.8897	Muscle_Skeletal	20.3913	3.78395e-16	0.708863	-1.80013	4.49954	2.52153	1.29591	5
ENSG00000260450.1	LINC02134	2.364e-05	2	1	2.364e-05	Brain_Putamen_basal_ganglia	2.364e-05	Brain_Putamen_basal_ganglia	2	3.14018e-16	2	-4.22741	4.22741	0	5.97846	1
ENSG00000131400.7	NAPSA	2.9118e-05	39	2	7.823e-06	Adipose_Subcutaneous	0.9857	Brain_Hippocampus	35.3946	8.54371e-16	2.90546	-4.46997	0.0179234	-4.07398	1.19649	2
ENSG00000163462.17	TRIM46	2.92739e-05	18	2	0.000100268	Esophagus_Muscularis	0.01035	Brain_Hypothalamus	15.2772	7.51106e-18	2.17723	-2.56391	3.88994	2.12326	1.73813	2
ENSG00000142686.7	C1orf216	3.08786e-05	48	2	0.0275	Cells_EBV-transformed_lymphocytes	0.8314	Brain_Cerebellum	44.9434	7.20905e-16	2.01331	-2.20435	0.374685	-0.95124	0.933097	2
ENSG00000196391.10	ZNF774	3.43187e-05	42	5	2.499e-06	Brain_Anterior_cingulate_cortex_BA24	0.99338	Artery_Tibial	21.844	1.92641e-15	0.741052	-4.62454	4.70821	1.88261	2.86246	5
ENSG00000166803.11	PCLAF	4.15004e-05	14	3	0.0007316	Heart_Atrial_Appendage	0.8788	Brain_Amygdala	12.1323	2.00706e-17	0.86858	0.152491	3.37745	2.63236	1.32125	3
ENSG00000263571.2	CTC-304I17.5	5.08034e-05	4	3	0.00301851	Brain_Spinal_cord_cervical_c-1	0.7229	Brain_Cerebellar_Hemisphere	2.90339	2.01903e-17	0.106358	-2.96585	1.11909	-0.638981	1.6997	3
ENSG00000283646.1	LINC02009	5.23145e-05	35	7	0.0006239	Brain_Amygdala	0.9036	Adipose_Subcutaneous	15.8394	7.62275e-16	0.688049	-2.39574	3.42101	1.26634	1.76842	7
ENSG00000181333.11	HEPHL1	5.33124e-05	25	4	0.03297	Artery_Tibial	0.896584	Cells_EBV-transformed_lymphocytes	18.7719	1.36484e-17	1.2198	-2.13245	1.35991	-0.660867	1.35627	4
ENSG00000258998.1	RP11-398E10.1	5.69671e-05	30	3	0.00735891	Brain_Frontal_Cortex_BA9	0.977366	Brain_Hypothalamus	21.7487	7.48095e-16	0.91494	-2.49263	2.68015	-0.0357506	0.992706	3
ENSG00000004838.13	ZMYND10	6.14913e-05	11	4	0.01387	Artery_Coronary	0.8765	Brain_Amygdala	6.30214	1.69669e-17	0.242493	-2.46061	1.85631	-0.52622	1.15594	4
ENSG00000164048.13	ZNF589	6.73233e-05	48	3	0.0001466	Kidney_Cortex	0.986923	Heart_Atrial_Appendage	41.6381	1.67062e-15	2.44182	-3.79676	1.00148	-1.14819	1.22126	3
ENSG00000163823.3	CCR1	6.99321e-05	47	2	2.75e-05	Nerve_Tibial	0.96	Lung	33.8856	7.77293e-16	12.0003	-4.1495	4.19324	0.650375	2.15585	2
ENSG00000235491.1	LINC01889	7.093e-05	1	1	7.093e-05	Vagina	7.093e-05	Vagina	1	1	1	-3.97314	-3.97314	-3.97314	NA	1
ENSG00000164080.13	RAD54L2	0.000108002	36	3	8.931e-05	Minor_Salivary_Gland	0.9832	Brain_Frontal_Cortex_BA9	27.2133	8.9754e-16	2.85792	-3.91794	2.34085	0.518342	1.41631	3
ENSG00000151498.11	ACAD8	0.000123358	42	6	0.000380066	Ovary	0.8679	Artery_Aorta	20.552	9.58951e-16	0.948759	-3.55355	3.14322	-0.725944	2.25	6
ENSG00000126062.3	TMEM115	0.000136052	5	2	0.06341	Skin_Sun_Exposed_Lower_leg	0.8535	Adipose_Visceral_Omentum	4.70782	5.99964e-17	0.292176	-1.85631	0.184655	-1.03992	1.11788	2
ENSG00000105996.6	HOXA2	0.000149241	7	4	0.002855	Muscle_Skeletal	0.573671	Whole_Blood	5.11722	0	0.19044	-0.821081	2.98293	1.73246	1.66497	4
ENSG00000112787.12	FBRSL1	0.000154998	33	8	0.00243861	Nerve_Tibial	0.834986	Breast_Mammary_Tissue	14.1177	1.14481e-15	0.481965	-3.03086	2.22621	-0.743933	1.75502	8
ENSG00000183625.14	CCR3	0.000168843	6	4	3.345e-05	Colon_Transverse	0.633775	Lung	3.53885	8.93194e-17	0.462294	-4.14861	0.771264	-1.60877	2.06025	4
ENSG00000230454.1	U73166.2	0.000169265	23	2	0.1147	Brain_Cerebellar_Hemisphere	0.6856	Heart_Left_Ventricle	21.6656	2.48969e-18	0.99688	-0.925704	1.57742	-0.30561	0.98783	2
ENSG00000243646.9	IL10RB	0.000191982	46	5	5.19486e-06	Muscle_Skeletal	0.661914	Whole_Blood	31.0356	3.02066e-15	1.17531	-2.81572	4.55676	2.72614	1.36446	5
ENSG00000163209.14	SPRR3	0.000241272	21	5	4.4926e-05	Heart_Atrial_Appendage	0.6198	Pituitary	13.0355	4.31683e-18	0.482559	-4.08057	2.31652	-1.10165	1.97227	5
ENSG00000142687.17	KIAA0319L	0.000243193	23	2	0.0004447	Brain_Frontal_Cortex_BA9	0.9665	Esophagus_Mucosa	21.9463	9.78993e-18	1.05371	-3.51203	3.51203	-2.66583	2.11087	2
ENSG00000213799.11	ZNF845	0.00026496	36	7	0.01247	Esophagus_Muscularis	0.993199	Artery_Coronary	14.0719	3.9241e-16	0.485381	-2.49856	1.84358	0.335246	0.949743	7
ENSG00000259321.1	RP11-468E2.5	0.000274943	47	2	0.07903	Colon_Transverse	0.833464	Thyroid	44.8213	8.9983e-16	2.14589	-1.75634	0.675119	-0.495619	0.867221	2
ENSG00000135436.8	FAM186B	0.00031435	5	3	0.1325	Kidney_Cortex	0.7634	Artery_Coronary	3.85076	7.8273e-17	0.176449	-1.50432	0.768483	-0.568437	0.959443	3
ENSG00000237489.3	LINC00959	0.000316847	45	3	4.43651e-05	Cells_Cultured_fibroblasts	0.997216	Brain_Caudate_basal_ganglia	33.6083	5.09957e-16	1.20723	-4.04753	4.08349	0.415898	1.81529	3
ENSG00000169964.7	TMEM42	0.000319419	48	3	0.000200456	Skin_Sun_Exposed_Lower_leg	0.9157	Stomach	35.6984	9.03893e-16	1.67198	-3.71844	0.984438	-2.39469	0.999919	3
ENSG00000107862.4	GBF1	0.000335494	47	3	1.9187e-05	Adipose_Subcutaneous	0.796622	Esophagus_Muscularis	36.0836	1.49207e-15	1.90586	-0.958164	4.27415	3.37389	1.56167	3
ENSG00000233791.5	LINC01136	0.000360824	14	7	8.52357e-05	Pancreas	0.7979	Heart_Atrial_Appendage	5.30926	8.52691e-18	0.354259	-3.22403	3.92918	0.0849884	2.61733	7
ENSG00000187546.13	AGMO	0.000368629	23	14	0.007107	Cells_Cultured_fibroblasts	0.9703	Brain_Anterior_cingulate_cortex_BA24	7.46721	1.83201e-17	0.301191	-2.69179	2.65791	0.462727	1.66222	14
ENSG00000143469.18	SYT14	0.000384869	20	6	0.05096	Brain_Spinal_cord_cervical_c-1	0.964761	Thyroid	9.77348	1.60693e-17	0.368223	-1.90439	1.95182	-0.258604	1.4365	6
ENSG00000243927.5	MRPS6	0.000390853	12	11	0.0008774	Heart_Atrial_Appendage	0.712807	Nerve_Tibial	3.23046	0.0877444	0.162637	-3.32715	2.76456	-0.641829	2.07848	11
ENSG00000198502.5	HLA-DRB5	0.000422172	7	5	0.003136	Nerve_Tibial	0.1995	Skin_Sun_Exposed_Lower_leg	3.124	0.0155477	0.136249	-2.61042	2.95408	0.927698	2.12306	5
ENSG00000084623.11	EIF3I	0.000430981	46	1	0.000390928	Muscle_Skeletal	0.0005275	Pancreas	45.6584	3.23941e-15	45.6584	-3.54613	3.50941	-3.0534	1.74499	1
ENSG00000160055.19	TMEM234	0.00044431	49	1	0.0004324	Brain_Caudate_basal_ganglia	0.0004491	Brain_Cerebellar_Hemisphere	48.9246	2.45307e-15	48.9246	3.50941	3.51948	3.50962	0.0014379	1
ENSG00000198276.15	UCKL1	0.000446295	22	7	0.005327	Artery_Tibial	0.9972	Adrenal_Gland	10.5205	3.31957e-18	0.420597	-2.78656	1.9168	-0.308729	1.72809	7
ENSG00000100053.9	CRYBB3	0.000456383	43	2	0.000494738	Spleen	0.360608	Brain_Frontal_Cortex_BA9	39.0389	3.85051e-15	1.63652	-3.48359	0.997545	-2.88301	0.82959	2
ENSG00000165863.16	C10orf82	0.000479973	40	5	0.0779819	Ovary	0.9272	Adipose_Visceral_Omentum	18.6614	5.53467e-16	0.793583	-1.76252	1.55941	-0.612424	1.1226	5
ENSG00000114735.9	HEMK1	0.000493426	49	2	0.000513427	Ovary	0.993919	Brain_Cerebellum	44.8543	1.12907e-15	1.98286	-0.417639	3.47365	1.73456	0.845595	2
ENSG00000253686.1	LINC01484	0.000499497	15	7	0.000897627	Brain_Cerebellum	0.957098	Nerve_Tibial	5.83546	1.33196e-17	0.231995	-2.81769	3.32079	0.862688	2.08834	7
ENSG00000230033.1	RP5-1121A15.3	0.000540987	4	3	0.01803	Pancreas	0.586	Brain_Cerebellum	2.93103	0.00145042	0.121359	0.544642	2.365	1.08908	0.855132	3
ENSG00000177058.11	SLC38A9	0.0005553	40	7	0.01784	Whole_Blood	0.8732	Breast_Mammary_Tissue	20.869	6.19269e-16	0.838173	-2.36892	1.30704	-0.649824	1.08112	7
ENSG00000128274.15	A4GALT	0.000578587	43	7	0.00246981	Esophagus_Gastroesophageal_Junction	0.806299	Pituitary	25.0828	2.31346e-15	0.886608	-2.27296	3.02702	1.14853	1.4668	7
ENSG00000148187.17	MRRF	0.000587489	22	3	3.417e-05	Minor_Salivary_Gland	0.941313	Brain_Cerebellum	17.8651	1.64402e-18	0.998905	-4.14373	0.288061	-0.377887	0.86134	3
ENSG00000230124.6	ACBD6	0.000589976	44	7	0.00316251	Muscle_Skeletal	0.99593	Artery_Aorta	18.8387	7.27009e-16	0.960494	-2.95148	2.67388	-0.16056	1.67027	7
ENSG00000214226.8	C17orf67	0.000596885	37	3	0.0502285	Ovary	0.9667	Brain_Hypothalamus	30.5595	7.15066e-16	1.45098	-1.90508	1.95801	1.02709	0.977128	3
ENSG00000162365.11	CYP4A22	0.000638979	35	4	0.03516	Breast_Mammary_Tissue	0.964052	Muscle_Skeletal	26.7312	2.60495e-15	1.43822	-1.57438	2.10651	0.0419149	0.996776	4
ENSG00000197217.12	ENTPD4	0.000702272	48	3	6.64216e-05	Stomach	0.526588	Spleen	36.3982	3.53433e-15	3.62694	-3.98875	1.42693	-2.05608	1.20125	3
ENSG00000180549.7	FUT7	0.000714316	47	2	0.0004546	Brain_Caudate_basal_ganglia	0.9713	Lung	33.7596	8.70645e-16	12.175	-3.50617	1.94363	-0.630716	1.88226	2
ENSG00000169231.13	THBS3	0.00075744	49	1	0.000177431	Testis	0.112619	Adipose_Visceral_Omentum	48.3441	5.96392e-16	48.3441	1.58653	3.74915	3.33725	0.489175	1
ENSG00000131398.13	KCNC3	0.000763363	45	5	1.44494e-05	Brain_Spinal_cord_cervical_c-1	0.8026	Brain_Caudate_basal_ganglia	24.1954	1.0698e-15	1.22744	-3.95243	4.33692	1.517	2.34965	5
ENSG00000160051.11	IQCC	0.000781839	42	1	0.0004245	Brain_Cortex	0.001227	Heart_Left_Ventricle	41.7842	1.67231e-15	41.7842	-3.52436	3.52436	1.58794	2.98976	1
ENSG00000020129.15	NCDN	0.000781952	49	2	9.68277e-05	Adipose_Subcutaneous	0.979503	Vagina	39.0938	7.57579e-16	9.203	-3.51203	3.89841	-0.36884	2.08385	2
ENSG00000260874.5	RP11-715J22.4	0.000789566	3	2	0.0007568	Kidney_Cortex	0.1819	Adipose_Subcutaneous	2.65898	2.46519e-32	0.341015	-3.36813	3.36813	0.444976	3.45519	2
ENSG00000273036.2	FAM95C	0.00080919	28	12	0.00535728	Nerve_Tibial	0.9769	Adipose_Subcutaneous	7.65227	5.78704e-16	0.255971	-2.26897	2.78473	-0.0250793	1.15802	12
ENSG00000175756.13	AURKAIP1	0.000858215	34	4	0.0215793	Muscle_Skeletal	0.958918	Skin_Sun_Exposed_Lower_leg	23.1073	8.41608e-16	1.73231	-2.29769	1.53169	-1.36707	0.717887	4
ENSG00000109758.8	HGFAC	0.000862259	36	6	5.62285e-06	Testis	0.972509	Pituitary	22.551	1.86269e-15	0.908488	-4.5401	2.79693	-0.249184	1.55617	6
ENSG00000034677.12	RNF19A	0.000870018	35	4	0.00380412	Lung	0.996014	Nerve_Tibial	21.8874	1.16957e-15	1.0025	-2.89396	2.81856	-0.37015	2.1944	4
ENSG00000072840.12	EVC	0.000879556	41	11	0.00075034	Heart_Atrial_Appendage	0.863793	Adipose_Subcutaneous	14.2664	1.0691e-15	0.659018	-2.51303	3.37049	1.85831	1.4856	11
ENSG00000070087.13	PFN2	0.000880774	36	7	0.00235983	Brain_Hypothalamus	0.9844	Breast_Mammary_Tissue	20.7004	7.35591e-16	0.71205	-3.04076	1.73571	-0.559933	1.20095	7
ENSG00000205045.8	SLFN12L	0.000885493	44	5	0.006938	Brain_Anterior_cingulate_cortex_BA24	0.879694	Small_Intestine_Terminal_Ileum	24.8416	4.8127e-16	1.18148	-1.00562	2.69981	1.5732	1.22001	5
ENSG00000132591.11	ERAL1	0.000924272	8	2	0.107	Brain_Substantia_nigra	0.7496	Cells_Cultured_fibroblasts	7.44859	4.55838e-17	0.55141	-1.61183	1.61183	2.77556e-17	1.24208	2
ENSG00000283408.1	RP1-242N11.1	0.0009318	1	1	0.0009318	Thyroid	0.0009318	Thyroid	1	1	1	-3.31035	-3.31035	-3.31035	NA	1
ENSG00000033011.11	ALG1	0.000976504	19	9	0.0007594	Brain_Hippocampus	0.9214	Artery_Tibial	8.53888	3.30901e-17	0.359517	-2.24264	3.36718	-0.355554	1.45611	9
ENSG00000162913.9	C1orf145	0.000981767	44	2	0.0002283	Esophagus_Mucosa	0.2945	Adipose_Subcutaneous	39.9582	9.70015e-16	2.98014	-1.09253	3.68545	2.28267	0.801857	2
ENSG00000144227.4	NXPH2	0.000994205	14	2	0.0003772	Brain_Amygdala	0.0114754	Ovary	12.8456	1.19656e-32	0.964335	-3.55554	3.55554	-1.08443	3.43951	2
ENSG00000124587.13	PEX6	0.00100769	49	1	0.000537857	Ovary	0.004406	Muscle_Skeletal	47.3916	7.42905e-16	47.3916	-3.46116	-2.84753	-3.23341	0.14112	1
ENSG00000165617.14	DACT1	0.00101847	43	5	0.001117	Adipose_Subcutaneous	0.4992	Brain_Hypothalamus	24.1679	4.99415e-16	0.908786	-3.25927	1.34353	-1.58058	1.96474	5
ENSG00000265043.1	RP11-728E14.3	0.00103586	6	3	0.08661	Nerve_Tibial	0.4725	Vagina	5.37397	5.80849e-17	0.292989	-1.71356	0.781685	-0.665891	0.804495	3
ENSG00000180304.14	OAZ2	0.00103965	48	2	2.05278e-05	Heart_Left_Ventricle	0.235915	Liver	34.5231	7.17928e-16	13.4088	-1.18526	4.25907	2.93634	1.04752	2
ENSG00000142599.17	RERE	0.00104222	20	6	0.05277	Pancreas	0.9725	Brain_Caudate_basal_ganglia	12.1854	1.68166e-17	0.430283	-1.3213	1.9368	0.460853	0.915568	6
ENSG00000182578.13	CSF1R	0.0010428	16	8	0.0733165	Adipose_Subcutaneous	0.5552	Skin_Not_Sun_Exposed_Suprapubic	5.79733	4.17754e-18	0.250647	-1.79086	1.35568	0.248893	1.09321	8
ENSG00000116809.11	ZBTB17	0.00106164	22	3	5.955e-05	Adipose_Visceral_Omentum	0.840372	Brain_Caudate_basal_ganglia	18.0841	3.43146e-18	1.0523	-1.01501	4.01459	0.0561821	1.7748	3
ENSG00000278370.1	RP11-387D10.4	0.001145	5	1	0.001145	Testis	0.001145	Artery_Tibial	5	1.16152e-17	5	3.25224	3.25224	3.25224	4.96507e-16	1
ENSG00000172236.16	TPSAB1	0.00117615	10	6	0.0002079	Muscle_Skeletal	0.8484	Colon_Transverse	4.03703	2.21292e-17	0.368463	-3.70922	1.90747	-0.590798	1.45831	6
ENSG00000231924.9	PSG1	0.0011815	2	1	0.001179	Cells_Cultured_fibroblasts	0.001184	Adipose_Subcutaneous	2	0	2	3.24271	3.24391	3.24331	0.000852546	1
ENSG00000179941.6	BBS10	0.00121186	35	3	0.04838	Heart_Atrial_Appendage	0.890273	Brain_Frontal_Cortex_BA9	24.0844	7.78632e-16	2.02757	-1.97402	1.70075	-1.07293	1.08251	3
ENSG00000088538.12	DOCK3	0.00124333	21	4	0.0001835	Whole_Blood	0.899	Artery_Tibial	12.6533	1.99625e-18	0.663093	-3.74071	3.08246	-1.36509	2.45236	4
ENSG00000134202.10	GSTM3	0.00134949	49	2	5.55197e-05	Whole_Blood	0.886892	Testis	43.3669	1.48361e-15	3.73821	-0.142238	4.03109	3.34147	0.587325	2
ENSG00000236133.1	LINC01069	0.00138081	1	1	0.00138081	Testis	0.00138081	Testis	1	1	1	-3.19863	-3.19863	-3.19863	NA	1
ENSG00000105289.14	TJP3	0.00139532	23	5	0.0003154	Colon_Sigmoid	0.3677	Brain_Cerebellar_Hemisphere	18.1069	1.3556e-17	0.691322	-3.60231	3.60231	-0.033846	3.27406	5
ENSG00000048740.18	CELF2	0.00141322	45	7	0.0016602	Brain_Putamen_basal_ganglia	0.585468	Vagina	21.8804	1.0351e-15	0.859556	-3.14512	2.55962	0.292064	1.64029	7
ENSG00000250064.1	RP11-123O22.1	0.00144006	3	3	0.0156085	Cells_Cultured_fibroblasts	0.68448	Ovary	2.47087	0.105075	0.105075	-1.14692	2.41794	0.288222	1.8812	3
ENSG00000125247.15	TMTC4	0.00144615	48	4	0.000898104	Brain_Hypothalamus	0.948692	Muscle_Skeletal	35.8592	1.02737e-15	1.58725	-2.28262	3.32064	-0.502109	1.72191	4
ENSG00000170265.11	ZNF282	0.00148142	7	5	0.009495	Artery_Aorta	0.7238	Ovary	3.39339	1.3639e-16	0.126154	-2.5937	1.09778	-1.08249	1.3114	5
ENSG00000242578.1	RP11-469J4.3	0.00149264	15	1	0.0005923	Pituitary	0.00349912	Artery_Coronary	14.4371	6.91359e-19	14.4371	2.92011	3.43512	3.11729	0.191842	1
ENSG00000166265.11	CYYR1	0.00154653	23	7	0.000724096	Colon_Transverse	0.810834	Muscle_Skeletal	13.3085	2.6215e-17	0.516136	-2.4601	3.38029	-0.190063	1.46498	7
ENSG00000260071.1	RP11-418I22.2	0.00155041	6	3	0.0005751	Small_Intestine_Terminal_Ileum	0.242785	Testis	4.00608	7.01425e-21	0.582104	-3.44309	-1.16805	-2.75862	1.06961	3
ENSG00000168875.2	SOX14	0.00159	1	1	0.00159	Prostate	0.00159	Prostate	1	1	1	3.15774	3.15774	3.15774	NA	1
ENSG00000182504.10	CEP97	0.00159161	17	5	0.0007937	Brain_Cerebellum	0.8026	Artery_Aorta	8.99127	6.29979e-18	0.418893	-3.35498	3.35498	-0.91737	1.77355	5
ENSG00000274070.1	GATSL2	0.00161952	2	2	0.0003376	Artery_Aorta	0.494	Kidney_Cortex	1.20279	0.797211	0.797211	-3.5846	-0.683961	-2.13428	2.05106	2
ENSG00000157326.18	DHRS4	0.00164171	43	7	0.0007237	Skin_Not_Sun_Exposed_Suprapubic	0.9027	Brain_Cerebellar_Hemisphere	24.4725	2.34277e-15	0.927778	-3.38044	2.97191	0.696674	1.11909	7
ENSG00000232629.8	HLA-DQB2	0.00171859	21	6	0.00147408	Muscle_Skeletal	0.7844	Small_Intestine_Terminal_Ileum	12.0686	2.47237e-17	0.619271	-3.17974	2.04505	-1.23149	1.78021	6
ENSG00000186160.4	CYP4Z1	0.0017828	13	4	0.00106648	Adipose_Subcutaneous	1	Heart_Atrial_Appendage	6.61852	5.01832e-17	0.86701	-1.00582	3.27237	0.981489	1.78914	4
ENSG00000132153.14	DHX30	0.001818	10	1	0.001818	Artery_Coronary	0.001818	Artery_Tibial	10	2.53679e-32	10	-3.11846	-3.11846	-3.11846	4.68111e-16	1
ENSG00000269736.1	CTD-2521M24.11	0.00185085	19	3	0.0003509	Brain_Cerebellum	0.993	Uterus	14.2896	4.23053e-18	0.579351	-3.5745	0.00877331	-2.14008	0.901743	3
ENSG00000248517.1	RP11-386B13.4	0.00187786	6	2	0.0047194	Skin_Not_Sun_Exposed_Suprapubic	0.508	Breast_Mammary_Tissue	5.60641	0.000106409	0.325462	-2.82559	-0.661955	-2.26931	0.806444	2
ENSG00000253986.1	CTC-756D1.3	0.00191232	2	2	0.001246	Cells_Cultured_fibroblasts	0.07056	Whole_Blood	1.11442	0.885581	0.885581	-3.22814	1.8083	-0.709918	3.5613	2
ENSG00000196275.13	GTF2IRD2	0.00191687	7	3	0.000378968	Esophagus_Muscularis	0.295	Adrenal_Gland	5.25269	2.68807e-32	0.258047	1.04722	3.55431	1.7865	0.836551	3
ENSG00000273669.1	RP11-405M12.4	0.00195769	34	2	0.0249041	Brain_Anterior_cingulate_cortex_BA24	0.83986	Whole_Blood	30.6545	1.23773e-15	3.34551	-2.24289	0.910612	-0.433524	1.09363	2
ENSG00000178342.4	KCNG2	0.00196807	27	10	0.003278	Skin_Not_Sun_Exposed_Suprapubic	0.9382	Brain_Hippocampus	10.9805	9.09501e-16	0.464118	-2.94039	2.94039	0.568443	1.1759	10
ENSG00000136147.17	PHF11	0.0019942	40	5	0.00534	Brain_Caudate_basal_ganglia	0.938714	Thyroid	23.4038	8.27606e-16	0.870888	-2.78577	2.71294	0.477843	1.54964	5
ENSG00000187866.8	FAM122A	0.00200596	43	4	0.0001401	Brain_Spinal_cord_cervical_c-1	0.852191	Artery_Coronary	25.304	1.70816e-15	1.94811	-3.80799	3.80799	1.05155	1.99528	4
ENSG00000196345.12	ZKSCAN7	0.00205004	39	2	0.002967	Brain_Frontal_Cortex_BA9	0.656643	Adipose_Visceral_Omentum	31.1804	5.18869e-16	5.2191	-2.97114	0.949072	-0.0481494	1.34396	2
ENSG00000006747.14	SCIN	0.00205044	44	6	0.00313956	Pituitary	0.949393	Brain_Spinal_cord_cervical_c-1	26.4511	3.83897e-16	0.905663	-2.95373	2.14786	-0.421233	1.70669	6
ENSG00000060982.14	BCAT1	0.00205744	25	13	0.00819059	Whole_Blood	0.9406	Brain_Cortex	8.39915	2.02705e-17	0.286422	-1.81951	2.64411	0.537817	1.29363	13
ENSG00000267790.1	LINC01987	0.00206048	2	2	0.001021	Esophagus_Muscularis	0.3108	Colon_Sigmoid	1.07315	0.926847	0.926847	-3.28468	-1.01354	-2.14911	1.60593	2
ENSG00000169241.17	SLC50A1	0.00206749	28	5	0.004379	Liver	0.5562	Brain_Cortex	23.5153	2.87266e-16	0.877634	-2.77507	2.84949	1.29578	1.00994	5
ENSG00000173262.11	SLC2A14	0.00209051	34	5	0.00335599	Adipose_Visceral_Omentum	0.954994	Adrenal_Gland	17.5459	1.39573e-15	0.699294	-2.9331	1.01816	-1.01093	1.05035	5
ENSG00000259737.6	RP11-475A13.1	0.00210151	6	4	0.006844	Colon_Transverse	0.653013	Testis	3.65921	0.00131269	0.231028	0.44958	2.70434	1.58516	0.940588	4
ENSG00000229249.6	LINC00446	0.002106	1	1	0.002106	Testis	0.002106	Testis	1	1	1	-3.07486	-3.07486	-3.07486	NA	1
ENSG00000121797.9	CCRL2	0.00213534	30	3	0.000346693	Artery_Aorta	0.826997	Brain_Putamen_basal_ganglia	18.8433	1.83305e-15	2.05673	-3.52864	3.57765	1.06762	1.72747	3
ENSG00000146352.12	CLVS2	0.00214331	26	10	0.008253	Colon_Transverse	0.9703	Brain_Putamen_basal_ganglia	8.90207	7.54003e-16	0.307726	-2.59636	2.64154	0.304359	1.22494	10
ENSG00000273258.1	RP11-394I13.3	0.00214899	13	2	0.1077	Artery_Aorta	0.2681	Artery_Coronary	12.5136	1.77615e-17	0.437008	-1.60862	1.40071	-1.02326	1.01544	2
ENSG00000222046.2	DCDC2B	0.00218132	9	2	0.0005275	Brain_Hypothalamus	0.01306	Ovary	8.01237	1.11e-16	0.880215	-3.0651	3.46639	1.00151	3.06009	2
ENSG00000160072.19	ATAD3B	0.00220081	26	8	0.0177411	Nerve_Tibial	0.8627	Esophagus_Muscularis	9.79467	6.6292e-16	0.371164	-1.93378	2.37098	0.399573	1.26371	8
ENSG00000112640.14	PPP2R5D	0.00220264	20	5	0.000466	Artery_Tibial	0.9292	Brain_Cortex	9.85162	3.94488e-18	0.371663	-3.21488	3.49958	1.70149	1.85184	5
ENSG00000177683.13	THAP5	0.00222572	44	2	0.000188514	Spleen	0.9974	Skin_Sun_Exposed_Lower_leg	38.4641	5.58224e-16	4.29526	-0.00325862	3.73393	3.17349	0.573518	2
ENSG00000166016.5	ABTB2	0.00224233	38	7	0.00105975	Cells_EBV-transformed_lymphocytes	0.9683	Adipose_Subcutaneous	23.3495	1.85171e-15	0.970272	-3.1695	3.27416	-0.493809	1.91653	7
ENSG00000204398.5	RP11-65D24.2	0.00228266	1	1	0.00228266	Testis	0.00228266	Testis	1	1	1	-3.05076	-3.05076	-3.05076	NA	1
ENSG00000233379.1	RP11-318G21.4	0.00228405	4	2	0.0004442	Brain_Caudate_basal_ganglia	0.03472	Brain_Substantia_nigra	3.26967	0.00395928	0.643952	-3.51233	-2.11161	-2.80116	0.757698	2
ENSG00000108010.11	GLRX3	0.00231892	44	7	0.00554188	Spleen	0.9614	Adrenal_Gland	16.292	1.01559e-15	0.632989	-2.41651	2.77372	0.45364	1.49739	7
ENSG00000110172.11	CHORDC1	0.00232632	39	4	0.01604	Adrenal_Gland	0.8381	Brain_Cerebellar_Hemisphere	22.4003	1.24762e-15	3.83528	-2.408	2.408	-0.148639	1.51629	4
ENSG00000012061.15	ERCC1	0.00234213	38	5	0.0795139	Esophagus_Muscularis	0.9706	Brain_Amygdala	25.3715	2.47897e-15	0.962952	-1.75351	1.62534	-0.543973	1.07392	5
ENSG00000185361.8	TNFAIP8L1	0.00234691	36	4	0.000614193	Esophagus_Mucosa	0.917748	Brain_Frontal_Cortex_BA9	28.2796	6.40213e-16	1.37447	-3.42527	2.96566	-0.680428	1.24487	4
ENSG00000168228.14	ZCCHC4	0.00236168	21	3	0.0003068	Esophagus_Gastroesophageal_Junction	0.3546	Pancreas	15.8932	1.10465e-17	0.786085	0.925704	3.60949	2.8317	0.767529	3
ENSG00000119655.10	NPC2	0.00237831	38	4	0.001594	Brain_Hypothalamus	0.7784	Cells_Cultured_fibroblasts	28.2365	2.03584e-15	1.56265	-0.908337	3.157	0.605703	0.768027	4
ENSG00000263280.1	LA16c-325D7.2	0.00238146	46	1	0.00180789	Artery_Coronary	0.00686292	Artery_Aorta	44.2024	1.77602e-15	44.2024	2.70342	3.1201	2.97771	0.0704545	1
ENSG00000140575.12	IQGAP1	0.00239778	49	2	0.00408204	Colon_Transverse	0.910123	Esophagus_Muscularis	42.0583	1.69868e-15	4.77433	-2.87175	1.79358	-0.769619	1.2457	2
ENSG00000158104.11	HPD	0.00240062	47	4	0.00229163	Uterus	0.947	Brain_Nucleus_accumbens_basal_ganglia	21.4238	9.94045e-16	3.6124	-3.04958	2.93097	-1.04715	1.55934	4
ENSG00000120306.9	CYSTM1	0.00242286	36	3	0.005297	Ovary	0.9797	Adrenal_Gland	32.258	5.68235e-16	1.07764	-0.842157	2.78839	0.220498	0.792291	3
ENSG00000136381.12	IREB2	0.00243147	45	3	0.000244885	Testis	0.7554	Colon_Sigmoid	36.3352	9.74069e-16	3.20942	-3.66755	1.65035	-1.94096	1.00714	3
ENSG00000261397.1	LINC01177	0.002436	1	1	0.002436	Testis	0.002436	Testis	1	1	1	-3.03118	-3.03118	-3.03118	NA	1
ENSG00000164049.14	FBXW12	0.00244323	31	1	0.002053	Brain_Amygdala	0.04199	Brain_Anterior_cingulate_cortex_BA24	30.0905	7.60912e-16	30.0905	-3.08246	-2.03362	-2.97521	0.310072	1
ENSG00000124818.15	OPN5	0.002469	1	1	0.002469	Heart_Left_Ventricle	0.002469	Heart_Left_Ventricle	1	1	1	-3.02712	-3.02712	-3.02712	NA	1
ENSG00000146463.11	ZMYM4	0.00250414	37	1	0.002331	Brain_Nucleus_accumbens_basal_ganglia	0.549011	Spleen	35.6993	2.84773e-15	35.6993	-3.04446	0.599243	-2.90653	0.63907	1
ENSG00000214194.8	LINC00998	0.00252064	44	4	0.000268797	Esophagus_Muscularis	0.432922	Whole_Blood	27.1492	7.56237e-16	1.00138	-0.868172	3.64365	2.28651	0.907296	4
ENSG00000281406.1	BLACAT1	0.0025244	21	7	0.015334	Brain_Hippocampus	0.869894	Brain_Cerebellum	9.89747	1.0579e-17	0.600416	-1.88849	2.42439	0.224145	1.33436	7
ENSG00000241231.1	RP11-275H4.1	0.00253155	15	1	0.00197982	Brain_Cerebellar_Hemisphere	0.00776534	Brain_Cortex	14.7898	8.94253e-18	14.7898	-3.03794	3.09324	2.59184	1.56279	1
ENSG00000118200.14	CAMSAP2	0.00256208	32	6	0.0343439	Adipose_Subcutaneous	0.999533	Small_Intestine_Terminal_Ileum	14.9404	1.36952e-15	0.645278	-1.57308	2.11601	0.0697816	0.94446	6
ENSG00000058804.11	NDC1	0.00257752	13	3	0.08971	Adipose_Visceral_Omentum	1	Artery_Coronary	11.3474	7.07617e-18	0.429591	-1.69693	0.283622	-1.04751	0.872592	3
ENSG00000224383.7	PRR29	0.002582	38	3	0.04263	Heart_Atrial_Appendage	0.9773	Prostate	32.4189	1.00752e-15	1.1432	-2.02732	0.825126	-1.09734	1.05919	3
ENSG00000188322.4	SBK1	0.00258429	13	5	0.02157	Artery_Aorta	0.9578	Artery_Coronary	6.95121	1.02714e-17	0.369872	-1.87626	2.29786	0.959955	1.28791	5
ENSG00000121807.5	CCR2	0.00266927	35	3	0.0005716	Brain_Spinal_cord_cervical_c-1	0.254436	Whole_Blood	17.9189	6.19873e-16	0.736578	-3.44474	3.44474	2.03389	1.65412	3
ENSG00000104826.12	LHB	0.00267412	22	3	0.0006394	Artery_Aorta	0.5656	Heart_Left_Ventricle	16.25	1.20031e-17	0.968992	-3.2263	3.41433	1.2471	2.49329	3
ENSG00000163463.11	KRTCAP2	0.0027239	4	3	0.005519	Brain_Caudate_basal_ganglia	0.2223	Skin_Not_Sun_Exposed_Suprapubic	2.78921	0.00149016	0.304549	-2.77507	-1.22044	-1.90106	0.644424	3
ENSG00000144681.10	STAC	0.0027253	36	6	0.0007602	Colon_Sigmoid	0.933004	Thyroid	24.0298	3.54994e-16	0.96937	-3.36689	0.961502	-0.0237444	1.17624	6
ENSG00000178802.17	MPI	0.00275629	44	3	0.001375	Artery_Coronary	0.949665	Esophagus_Mucosa	33.5522	9.63752e-16	3.34779	-2.04739	3.19985	0.650843	1.1277	3
ENSG00000169885.9	CALML6	0.00277774	49	3	0.02303	Brain_Spinal_cord_cervical_c-1	0.96245	Lung	33.8052	8.41551e-16	1.43932	-1.52084	2.27294	0.0532384	0.793511	3
ENSG00000128590.4	DNAJB9	0.00280069	25	3	0.0004629	Muscle_Skeletal	0.9974	Artery_Aorta	21.4592	6.73957e-18	1.45063	0.00325862	3.50135	0.285682	0.916616	3
ENSG00000108344.14	PSMD3	0.00282557	40	2	0.00069978	Nerve_Tibial	0.795906	Esophagus_Mucosa	33.3836	1.18069e-15	4.71801	-3.2996	3.38967	2.12047	1.47766	2
ENSG00000260979.1	RP11-77H9.8	0.00284208	14	4	0.000756883	Skin_Not_Sun_Exposed_Suprapubic	0.778003	Whole_Blood	7.52429	5.82583e-18	0.809357	-3.3681	1.07316	-0.881854	1.21415	4
ENSG00000114388.12	NPRL2	0.00286627	38	2	0.00157969	Skin_Not_Sun_Exposed_Suprapubic	0.06341	Adipose_Visceral_Omentum	35.0549	2.40108e-15	2.94506	1.85631	3.15963	1.9531	0.335406	2
ENSG00000129910.7	CDH15	0.00286782	33	5	0.000202809	Esophagus_Gastroesophageal_Junction	0.172771	Brain_Cerebellum	15.7333	4.75601e-16	0.621127	-2.03568	3.71549	2.08743	1.40289	5
ENSG00000054967.12	RELT	0.00286969	33	2	0.0001267	Cells_Cultured_fibroblasts	0.8251	Skin_Sun_Exposed_Lower_leg	26.9705	2.64325e-15	3.48546	-2.99041	3.83279	2.0083	1.4016	2
ENSG00000273476.1	RP11-108L7.14	0.00287994	8	5	0.04242	Brain_Caudate_basal_ganglia	0.874	Testis	3.29765	4.61889e-17	0.125519	-2.02938	0.674804	-0.081332	0.849573	5
ENSG00000142694.6	EVA1B	0.00288442	49	2	0.03028	Kidney_Cortex	0.980136	Muscle_Skeletal	45.1695	1.31192e-15	2.71304	-2.0977	2.16641	-0.15716	0.832507	2
ENSG00000181220.15	ZNF746	0.00290341	20	4	0.01732	Brain_Caudate_basal_ganglia	0.9194	Cells_Cultured_fibroblasts	10.282	1.92211e-17	0.414504	-2.37984	2.37984	-0.305629	1.67056	4
ENSG00000243364.7	EFNA4	0.00290541	5	4	0.003253	Colon_Sigmoid	0.06132	Cells_Cultured_fibroblasts	2.19069	1.77064e-16	0.598141	-2.94276	2.43432	1.24423	2.35312	4
ENSG00000148985.19	PGAP2	0.00292693	27	7	0.06015	Testis	0.9962	Nerve_Tibial	17.7259	9.55337e-16	0.604153	-1.5456	1.87969	-0.373471	1.00176	7
ENSG00000188095.4	MESP2	0.00296783	37	5	0.00207	Skin_Not_Sun_Exposed_Suprapubic	0.8418	Esophagus_Mucosa	18.329	1.57401e-15	1.08675	-2.74805	3.08	-0.553872	1.5805	5
ENSG00000101144.12	BMP7	0.00309072	43	6	0.0581503	Brain_Cerebellar_Hemisphere	1	Brain_Substantia_nigra	28.3753	5.05893e-16	0.955784	-1.57568	1.89456	-0.298232	1.00802	6
ENSG00000115541.10	HSPE1	0.00315515	47	2	0.000334703	Pituitary	0.96695	Prostate	35.8475	9.75984e-16	11.1525	-3.49107	3.58685	-0.106172	2.40532	2
ENSG00000036565.14	SLC18A1	0.00321053	8	3	0.004611	Colon_Transverse	0.904028	Brain_Hypothalamus	5.38633	1.64107e-20	0.798618	-2.83302	2.83302	-0.323508	1.57622	3
ENSG00000261037.1	CTC-471C19.1	0.003222	27	7	0.000852	Lung	0.624241	Nerve_Tibial	10.9876	3.45737e-16	0.457471	-1.23105	3.33532	0.67777	1.2509	7
ENSG00000251471.1	RP11-166D18.1	0.003239	1	1	0.003239	Pancreas	0.003239	Pancreas	1	1	1	-2.9441	-2.9441	-2.9441	NA	1
ENSG00000077616.10	NAALAD2	0.00324163	48	5	0.0142804	Brain_Nucleus_accumbens_basal_ganglia	0.999853	Liver	31.5136	3.00868e-15	1.44855	-2.20109	2.45013	-0.402739	0.877302	5
ENSG00000125144.13	MT1G	0.00338679	44	4	0.00132374	Brain_Frontal_Cortex_BA9	0.995292	Skin_Not_Sun_Exposed_Suprapubic	25.2222	2.34962e-15	3.06803	-2.69708	3.21078	0.101206	1.50648	4
ENSG00000109674.3	NEIL3	0.00342435	11	6	0.00356157	Testis	0.809159	Cells_Cultured_fibroblasts	5.00778	1.17935e-17	0.240113	-2.91459	1.37156	-0.838008	1.72976	6
ENSG00000261268.1	RP11-308D13.3	0.00346493	4	4	0.0009105	Minor_Salivary_Gland	0.3591	Brain_Hypothalamus	2.02001	0.34049	0.34049	-1.04116	3.31681	1.53498	2.01557	4
ENSG00000143882.10	ATP6V1C2	0.00350525	40	7	0.000524977	Whole_Blood	0.705549	Skin_Not_Sun_Exposed_Suprapubic	19.8039	7.05382e-16	0.715852	-3.46768	1.64062	-1.07681	1.16546	7
ENSG00000116819.6	TFAP2E	0.00350721	46	2	0.0007736	Skin_Sun_Exposed_Lower_leg	0.8283	Adipose_Visceral_Omentum	43.2515	1.39746e-15	2.74853	0.216882	3.36207	0.41514	0.759858	2
ENSG00000144792.9	ZNF660	0.00352358	49	2	0.000769115	Nerve_Tibial	0.664068	Whole_Blood	45.5065	4.47857e-15	2.79891	0.434304	3.36368	2.94256	0.550512	2
ENSG00000257591.5	ZNF625	0.003533	37	1	0.003533	Artery_Aorta	0.003533	Adipose_Visceral_Omentum	37	1.88846e-15	37	-2.9171	-2.9171	-2.9171	3.14018e-16	1
ENSG00000203791.14	METTL10	0.00360397	49	2	0.00995744	Brain_Cerebellar_Hemisphere	0.99836	Heart_Atrial_Appendage	45.5332	4.50091e-15	1.78583	-0.420631	2.5773	1.02428	0.757094	2
ENSG00000110801.13	PSMD9	0.00361834	39	3	0.001016	Artery_Tibial	0.9851	Skin_Not_Sun_Exposed_Suprapubic	27.5979	1.14524e-15	0.957989	-0.0186755	3.28606	2.60051	1.01615	3
ENSG00000180357.9	ZNF609	0.0036202	40	3	0.0003625	Adipose_Visceral_Omentum	0.5476	Skin_Sun_Exposed_Lower_leg	34.1316	1.02134e-15	1.21515	-3.56598	3.56598	-2.35623	2.30742	3
ENSG00000267152.1	CTD-2528L19.6	0.00362515	13	4	0.00269	Thyroid	0.7321	Brain_Spinal_cord_cervical_c-1	8.57592	2.96643e-18	0.694873	-0.342333	3.00111	1.82745	1.18452	4
ENSG00000249806.1	RP11-223C24.1	0.00363985	4	3	0.00161	Small_Intestine_Terminal_Ileum	0.05807	Adrenal_Gland	3.55546	0.00286839	0.153033	1.89517	3.15409	2.23866	0.6121	3
ENSG00000162482.4	AKR7A3	0.00364914	36	7	0.00314	Cells_EBV-transformed_lymphocytes	0.988983	Esophagus_Mucosa	15.2492	9.32829e-16	0.666908	-2.95369	2.95369	-0.423798	1.94974	7
ENSG00000115234.10	SNX17	0.00368444	34	4	0.01803	Pancreas	0.9465	Artery_Coronary	24.9829	6.80288e-16	1.1325	-2.365	2.30378	0.393191	1.16486	4
ENSG00000154358.20	OBSCN	0.00371557	19	5	0.0001088	Nerve_Tibial	0.663761	Testis	13.5421	4.36344e-17	0.467675	-3.68545	3.87008	1.01772	2.37817	5
ENSG00000109332.19	UBE2D3	0.00372678	48	2	0.0002042	Artery_Tibial	0.2804	Brain_Substantia_nigra	43.9688	9.70591e-16	3.63428	1.07942	3.71376	2.95849	0.703311	2
ENSG00000163833.7	FBXO40	0.00376779	10	4	0.009739	Whole_Blood	0.912148	Skin_Not_Sun_Exposed_Suprapubic	7.48639	4.09788e-21	0.509531	-2.58496	2.39045	0.571357	1.26228	4
ENSG00000197576.13	HOXA4	0.00377028	32	3	0.001844	Lung	0.8137	Colon_Sigmoid	26.2188	9.83556e-16	1.2684	-3.11427	3.11427	0.191149	2.81904	3
ENSG00000145050.15	MANF	0.00377037	32	2	0.000782507	Breast_Mammary_Tissue	0.06196	Adipose_Visceral_Omentum	19.8203	6.1031e-16	12.0511	-3.35891	-1.86658	-2.51509	0.696934	2
ENSG00000106683.14	LIMK1	0.00378661	43	3	0.007607	Ovary	0.446116	Muscle_Skeletal	37.7618	1.30789e-15	1.74259	-2.66903	2.10663	-0.765712	1.46512	3
ENSG00000164663.14	USP49	0.00380969	40	4	0.000327973	Whole_Blood	0.1008	Stomach	27.0205	2.63221e-15	1.09666	-3.59214	2.10444	-2.10509	1.66231	4
ENSG00000253526.1	RP11-152P17.3	0.00382205	3	2	0.0008727	Brain_Cerebellar_Hemisphere	0.8152	Testis	2	4.23152e-20	1	-3.32864	0.233723	-2.14119	2.05673	2
ENSG00000176381.5	PRR18	0.00385766	32	3	0.02043	Testis	0.92765	Pancreas	21.4416	4.70064e-16	0.877425	-2.31836	2.31836	0.331348	1.56921	3
ENSG00000099817.11	POLR2E	0.00390478	48	5	0.000589242	Brain_Cerebellar_Hemisphere	0.814612	Skin_Sun_Exposed_Lower_leg	27.0432	2.54261e-15	1.17764	-3.43652	2.51121	-0.242543	1.71093	5
ENSG00000114737.15	CISH	0.00392001	45	1	0.000242	Artery_Coronary	0.02243	Nerve_Tibial	43.7121	1.78261e-15	43.7121	-3.67058	3.67058	1.09926	2.74131	1
ENSG00000141934.9	PLPP2	0.00395899	46	4	0.000401	Liver	0.519146	Muscle_Skeletal	36.7132	3.61686e-15	1.30328	-1.27094	3.53942	1.66938	0.767796	4
ENSG00000234556.1	LINC00701	0.003989	1	1	0.003989	Testis	0.003989	Testis	1	1	1	-2.87903	-2.87903	-2.87903	NA	1
ENSG00000013392.7	RWDD2A	0.00399076	38	2	0.00762	Brain_Cerebellum	0.773238	Artery_Tibial	33.0245	9.27015e-16	3.95447	-1.83659	2.66846	-1.25463	1.27555	2
ENSG00000157214.13	STEAP2	0.00399332	45	4	0.0102418	Vagina	0.831609	Liver	27.9476	6.04961e-16	1.96316	-2.56756	2.50313	-1.81668	1.05538	4
ENSG00000203809.6	LIN28B-AS1	0.00402901	11	3	0.0607	Brain_Amygdala	0.8159	Brain_Nucleus_accumbens_basal_ganglia	10.1856	6.96744e-17	0.346817	-1.87567	-0.232822	-1.1431	0.761746	3
ENSG00000175764.14	TTLL11	0.00404654	28	4	0.07745	Artery_Coronary	0.9956	Adipose_Subcutaneous	19.2716	2.78206e-16	0.658187	-1.76568	0.58017	-0.318229	0.798133	4
ENSG00000144410.4	CPO	0.00407258	12	9	0.05954	Esophagus_Muscularis	0.519203	Kidney_Cortex	3.52601	4.61015e-17	0.340218	-1.53697	1.88418	0.622708	1.25567	9
ENSG00000116754.13	SRSF11	0.004082	5	1	0.004082	Artery_Aorta	0.004082	Cells_Cultured_fibroblasts	5	0	5	-2.87175	-2.87175	-2.87175	3.14018e-16	1
ENSG00000162636.15	FAM102B	0.0041113	47	5	0.00227416	Liver	0.9638	Brain_Frontal_Cortex_BA9	30.0816	9.1929e-16	1.03719	-3.05188	0.296694	-2.05216	0.859232	5
ENSG00000104812.14	GYS1	0.00412227	41	2	0.00183912	Thyroid	0.6826	Colon_Transverse	34.036	8.25352e-16	4.13739	-3.11505	3.04874	-2.10332	1.82802	2
ENSG00000162062.14	C16orf59	0.00413244	19	3	0.0007568	Brain_Cortex	0.4069	Brain_Hypothalamus	15.7942	1.94808e-17	0.527956	-3.36813	3.36813	-2.23853	2.14575	3
ENSG00000228639.6	LINC02095	0.00413631	15	3	0.000343084	Cells_EBV-transformed_lymphocytes	0.512425	Brain_Caudate_basal_ganglia	11.6168	2.36171e-17	0.869813	-3.58039	2.14254	-2.58346	1.50484	3
ENSG00000248901.1	LINC01846	0.00414581	1	1	0.00414581	Testis	0.00414581	Testis	1	1	1	2.86685	2.86685	2.86685	NA	1
ENSG00000244752.2	CRYBB2	0.00414702	34	9	0.000427833	Nerve_Tibial	0.744297	Esophagus_Muscularis	18.3871	3.92267e-16	0.653768	-3.52229	0.810626	-2.23806	1.21227	9
ENSG00000177947.13	ODF3	0.004195	1	1	0.004195	Testis	0.004195	Testis	1	1	1	-2.86311	-2.86311	-2.86311	NA	1
ENSG00000268536.1	AC005523.3	0.00422042	23	3	0.001486	Testis	0.5429	Brain_Cortex	15.5985	9.33501e-18	0.96752	-3.1774	1.90752	0.754005	1.18035	3
ENSG00000275088.1	RP11-442O1.3	0.00425013	36	7	0.0171866	Adipose_Subcutaneous	0.878	Heart_Left_Ventricle	19.6237	1.45492e-15	0.683284	-2.38269	2.09168	-0.00347341	1.32857	7
ENSG00000141873.10	SLC39A3	0.00434253	23	2	0.01213	Artery_Aorta	0.768962	Colon_Sigmoid	17.7956	4.15067e-17	4.37519	-2.50834	2.4419	-0.816476	1.48333	2
ENSG00000253871.1	RP11-756K15.2	0.004347	1	1	0.004347	Testis	0.004347	Testis	1	1	1	-2.85182	-2.85182	-2.85182	NA	1
ENSG00000188199.10	NUTM2B	0.00434948	22	3	0.00330217	Stomach	0.967967	Artery_Tibial	14.2529	3.19812e-19	1.90668	-2.93811	0.66336	-0.867351	1.4559	3
ENSG00000104827.12	CGB3	0.00436296	3	2	0.001184	Testis	0.002888	Pancreas	2.75644	0.0309688	0.21259	2.97941	3.24271	3.09918	0.133244	2
ENSG00000102893.15	PHKB	0.00443671	30	3	0.0009798	Artery_Aorta	0.929662	Nerve_Tibial	15.0295	5.07969e-16	5.71173	-2.9891	3.29626	0.19712	1.70255	3
ENSG00000163636.10	PSMD6	0.00448246	47	5	0.000157	Brain_Putamen_basal_ganglia	0.9921	Small_Intestine_Terminal_Ileum	19.6438	1.03701e-15	0.704064	-1.06173	3.77973	-0.0750431	1.26147	5
ENSG00000114378.16	HYAL1	0.00449782	11	8	0.05863	Pituitary	0.7718	Colon_Transverse	3.42912	1.8609e-16	0.11744	-1.52044	1.89096	0.428139	1.19627	8
ENSG00000240303.7	ACAD11	0.00450928	47	3	0.00366502	Brain_Cerebellar_Hemisphere	0.5109	Kidney_Cortex	36.6537	8.39829e-16	3.73915	-2.8512	2.90564	-1.97635	1.63322	3
ENSG00000164082.14	GRM2	0.004519	46	4	0.00048	Ovary	0.8164	Adrenal_Gland	23.8357	2.3106e-15	1.17683	-3.49168	0.232178	-1.23349	1.04207	4
ENSG00000169184.5	MN1	0.00453326	15	7	0.02355	Brain_Substantia_nigra	0.9523	Adipose_Visceral_Omentum	7.27046	4.16742e-18	0.249627	-1.56749	2.26439	0.189726	1.18158	7
ENSG00000028528.14	SNX1	0.00456356	34	2	0.01294	Adipose_Subcutaneous	0.589186	Cells_Cultured_fibroblasts	27.0409	7.35015e-16	6.68276	-1.70561	2.48542	1.62177	1.43248	2
ENSG00000171522.5	PTGER4	0.00456627	34	4	0.02699	Nerve_Tibial	0.959694	Ovary	25.397	9.11562e-16	0.965872	-2.21166	1.67809	0.396638	1.01242	4
ENSG00000163191.5	S100A11	0.00458142	10	4	0.01045	Ovary	0.6257	Pancreas	6.19305	4.48562e-17	0.246279	-0.67764	2.56057	1.17643	1.41899	4
ENSG00000232118.2	BACH1-AS1	0.00464047	17	3	0.1125	Lung	0.7645	Skin_Not_Sun_Exposed_Suprapubic	11.5971	3.59536e-17	0.395418	-0.680417	1.58706	-0.30296	0.715751	3
ENSG00000204839.8	MROH6	0.0046522	48	4	0.000408458	Liver	0.993	Kidney_Cortex	31.6383	3.06435e-15	2.37123	-0.739541	3.53456	1.40845	1.15818	4
ENSG00000157734.13	SNX22	0.00470096	49	4	0.0122	Brain_Amygdala	0.982806	Heart_Left_Ventricle	23.2422	4.41865e-16	0.785687	-2.50631	2.50631	0.995398	1.40323	4
ENSG00000168002.11	POLR2G	0.00470866	17	2	0.002554	Brain_Caudate_basal_ganglia	0.5226	Adipose_Visceral_Omentum	14.1518	1.40618e-17	2.84819	-3.01687	3.01687	-0.123404	1.43109	2
ENSG00000100523.14	DDHD1	0.00471277	46	2	0.002406	Artery_Coronary	0.989175	Breast_Mammary_Tissue	37.3155	9.84958e-16	7.1228	-0.272998	3.03492	0.803977	1.09381	2
ENSG00000187535.13	IFT140	0.00474499	44	5	0.011003	Esophagus_Mucosa	0.985949	Prostate	30.2121	2.93533e-15	1.22925	-1.36009	2.5426	1.00382	0.915854	5
ENSG00000181218.5	HIST3H2A	0.00475688	31	5	0.00264701	Adipose_Subcutaneous	0.7296	Brain_Amygdala	18.6545	1.62846e-15	0.757998	-3.00601	2.36727	-0.398231	2.10928	5
ENSG00000214237.10	MINDY4B	0.00479402	4	4	0.0001666	Brain_Frontal_Cortex_BA9	0.8041	Vagina	1.11526	0.869948	0.869948	-0.639035	3.76492	0.912304	1.9486	4
ENSG00000071626.16	DAZAP1	0.00482118	21	6	0.040069	Testis	0.6785	Colon_Sigmoid	12.2891	2.62347e-18	0.554429	-1.97191	2.05304	-0.281451	1.13835	6
ENSG00000185963.13	BICD2	0.00488891	47	5	0.000311986	Uterus	0.9159	Adipose_Visceral_Omentum	29.1525	1.01976e-15	1.75508	-3.46879	3.60514	1.06812	1.42998	5
ENSG00000116560.10	SFPQ	0.00489665	14	1	0.003543	Esophagus_Gastroesophageal_Junction	0.0121	Brain_Putamen_basal_ganglia	13.5929	1.42516e-18	13.5929	2.50921	2.91622	2.77086	0.202382	1
ENSG00000171310.10	CHST11	0.00489903	41	12	0.008866	Heart_Atrial_Appendage	0.964	Whole_Blood	14.0499	3.9624e-16	0.645271	-1.82095	2.61718	-0.394044	1.239	12
ENSG00000124713.5	GNMT	0.0049392	48	2	0.000630745	Artery_Tibial	0.728553	Prostate	44.4645	7.11118e-16	2.25231	-3.22257	3.41804	2.95686	1.00269	2
ENSG00000170276.5	HSPB2	0.00498618	43	3	0.01623	Artery_Aorta	0.955488	Nerve_Tibial	26.307	5.64945e-16	0.892089	-2.24187	2.4037	0.720471	1.48102	3
ENSG00000124788.17	ATXN1	0.00505187	28	9	0.002614	Lung	0.8024	Colon_Transverse	11.2831	7.64318e-16	0.57276	-1.85288	3.00982	-0.0771481	1.37305	9
ENSG00000157823.16	AP3S2	0.00508069	49	2	0.003012	Brain_Cerebellum	0.864147	Whole_Blood	44.4538	7.62711e-16	1.75803	-2.96651	-0.171098	-1.74401	0.438084	2
ENSG00000163364.9	LINC01116	0.00508525	31	4	0.08938	Artery_Tibial	0.9137	Esophagus_Gastroesophageal_Junction	19.3033	1.87968e-15	0.686619	-0.482712	1.69868	0.170557	0.622934	4
ENSG00000140876.11	NUDT7	0.00508613	49	9	0.00386337	Adrenal_Gland	0.943801	Liver	25.431	1.85832e-15	0.906565	-2.02276	2.88911	1.08299	1.14078	9
ENSG00000172216.5	CEBPB	0.00509438	26	1	0.005091	Adipose_Subcutaneous	0.005099	Artery_Coronary	26	1.82337e-15	26	-2.80122	2.80122	1.50821	2.40702	1
ENSG00000225877.1	PSG8-AS1	0.00509452	8	1	0.004734	Brain_Substantia_nigra	0.005148	Brain_Caudate_basal_ganglia	8	2.50588e-34	8	-2.8246	-2.79762	-2.801	0.00953665	1
ENSG00000141977.9	CIB3	0.00510648	1	1	0.00510648	Testis	0.00510648	Testis	1	1	1	-2.80024	-2.80024	-2.80024	NA	1
ENSG00000117139.16	KDM5B	0.00517187	43	6	0.000204549	Muscle_Skeletal	0.9855	Colon_Transverse	21.8407	5.93099e-16	0.858304	-3.71333	0.217488	-1.83752	1.31437	6
ENSG00000104518.10	GSDMD	0.0051992	46	4	0.0004806	Minor_Salivary_Gland	0.995299	Spleen	30.8064	2.80312e-15	2.55898	-1.04138	3.49134	0.658546	1.22594	4
ENSG00000082438.15	COBLL1	0.00524832	44	4	0.000481988	Cells_Cultured_fibroblasts	0.995711	Heart_Atrial_Appendage	24.4427	5.72125e-16	1.11117	-3.37915	3.49057	0.904765	1.97687	4
ENSG00000187726.8	DNAJB13	0.00526929	41	6	0.0169024	Testis	0.918505	Brain_Anterior_cingulate_cortex_BA24	20.3737	6.82712e-16	0.693254	-1.3924	2.38882	-0.525663	0.933632	6
ENSG00000187003.6	ACTL7A	0.00530006	1	1	0.00530006	Testis	0.00530006	Testis	1	1	1	2.78821	2.78821	2.78821	NA	1
ENSG00000198087.7	CD2AP	0.00532245	35	4	0.004028	Artery_Aorta	0.9674	Whole_Blood	21.9287	6.87572e-16	0.986667	-2.87596	0.595963	-1.06848	1.44093	4
ENSG00000134853.11	PDGFRA	0.00532471	25	1	0.005186	Testis	0.4327	Esophagus_Mucosa	24.1974	7.56928e-18	24.1974	-2.79525	2.79525	-2.26758	1.57572	1
ENSG00000198821.10	CD247	0.00533704	34	9	0.00191728	Brain_Caudate_basal_ganglia	0.973559	Nerve_Tibial	17.0987	6.18281e-16	0.58115	-1.55235	3.10276	0.352684	1.02761	9
ENSG00000250971.1	RP11-696F12.1	0.00534061	20	6	0.0581649	Artery_Tibial	0.8389	Artery_Coronary	11.2972	1.05909e-17	0.402067	-1.89445	1.77886	-0.20556	1.28783	6
ENSG00000174013.7	FBXO45	0.00535248	41	4	0.00784901	Brain_Hypothalamus	0.3675	Esophagus_Muscularis	29.0677	1.08798e-15	1.602	-0.960308	2.6585	2.14174	0.89584	4
ENSG00000101558.13	VAPA	0.00539866	39	7	0.0119428	Heart_Left_Ventricle	0.995601	Brain_Caudate_basal_ganglia	21.0347	7.45988e-16	0.791828	-2.51383	0.580155	-0.630746	0.962594	7
ENSG00000144406.18	UNC80	0.00542392	32	3	0.000433072	Esophagus_Gastroesophageal_Junction	0.6518	Kidney_Cortex	19.7588	5.33081e-16	5.91961	-1.07383	3.51906	2.34916	1.44247	3
ENSG00000256229.7	ZNF486	0.00548466	15	4	0.002426	Minor_Salivary_Gland	0.866037	Colon_Transverse	7.43864	1.07733e-17	0.660893	-3.03242	1.07289	-0.480413	1.63177	4
ENSG00000128989.10	ARPP19	0.00552219	38	3	0.0004271	Esophagus_Muscularis	0.970497	Skin_Not_Sun_Exposed_Suprapubic	29.2851	2.87508e-15	1.96958	-3.52275	0.766344	0.17097	1.03093	3
ENSG00000253390.1	CTC-756D1.2	0.00553364	6	2	0.001798	Small_Intestine_Terminal_Ileum	0.01152	Testis	5.3242	8.47596e-17	0.667297	-3.12172	-2.52652	-2.95725	0.220492	2
ENSG00000178425.13	NT5DC1	0.00557503	48	5	0.000549268	Cells_Cultured_fibroblasts	0.914869	Brain_Nucleus_accumbens_basal_ganglia	21.4041	1.01375e-15	1.51856	-3.10588	3.4555	0.928048	1.70272	5
ENSG00000065371.17	ROPN1	0.00559083	5	3	0.008178	Skin_Sun_Exposed_Lower_leg	0.0712	Colon_Transverse	3.12784	1.34202e-16	0.845047	-2.64463	-1.8042	-2.47217	0.373419	3
ENSG00000134369.15	NAV1	0.00561514	13	10	0.01632	Whole_Blood	0.894338	Kidney_Cortex	4.44708	2.64028e-16	0.162352	-2.36254	2.40168	0.272282	1.21279	10
ENSG00000101391.20	CDK5RAP1	0.00561515	17	6	0.002364	Artery_Tibial	0.6442	Artery_Aorta	9.44519	1.85061e-17	0.404045	-1.62342	3.04023	0.40401	1.60722	6
ENSG00000145354.9	CISD2	0.00562902	49	2	0.0002042	Thyroid	0.2804	Heart_Left_Ventricle	45.2299	4.4651e-15	3.20989	1.07942	3.71376	2.79358	0.525743	2
ENSG00000115520.8	COQ10B	0.00563647	33	2	0.002127	Uterus	0.03213	Pituitary	28.0293	1.49449e-15	4.8843	-3.0719	3.0719	2.72305	1.09186	2
ENSG00000047849.21	MAP4	0.00564016	25	2	0.001941	Thyroid	0.06046	Muscle_Skeletal	23.5948	1.12648e-17	0.995334	-3.09911	2.8893	-0.314634	2.74317	2
ENSG00000160058.18	BSDC1	0.00569064	13	2	0.4399	Colon_Transverse	0.4531	Thyroid	12.3847	2.54191e-17	0.615343	-0.750257	0.772362	0.303864	0.731443	2
ENSG00000136868.10	SLC31A1	0.00571524	42	6	0.003467	Brain_Cerebellum	0.7995	Brain_Nucleus_accumbens_basal_ganglia	19.9881	7.39136e-16	1.34042	-2.73781	2.92298	-0.220513	1.52945	6
ENSG00000163807.5	KIAA1143	0.00571549	42	3	0.0149259	Muscle_Skeletal	0.6632	Minor_Salivary_Gland	27.4799	8.71102e-16	1.12554	-2.43417	2.4046	-0.115532	1.89098	3
ENSG00000142002.16	DPP9	0.00573612	45	6	4.4106e-05	Cells_Cultured_fibroblasts	0.993857	Brain_Putamen_basal_ganglia	28.6454	4.29534e-16	0.993265	-4.08485	2.064	-1.35496	1.18377	6
ENSG00000138080.13	EMILIN1	0.00574589	45	3	0.00754182	Brain_Substantia_nigra	0.748455	Ovary	25.0531	1.1263e-15	1.97272	-1.50821	2.67192	1.09713	1.55145	3
ENSG00000136944.17	LMX1B	0.00577069	25	7	0.005027	Heart_Atrial_Appendage	0.960145	Pancreas	11.3791	2.22125e-17	0.466638	-2.61782	2.8053	-0.90989	1.40369	7
ENSG00000114391.12	RPL24	0.00582092	46	2	0.0024	Brain_Frontal_Cortex_BA9	0.9055	Adipose_Subcutaneous	36.5809	7.56636e-16	8.46853	-3.03567	0.310738	-1.54905	1.24697	2
ENSG00000086544.2	ITPKC	0.00587727	46	4	0.01208	Brain_Cerebellar_Hemisphere	0.926115	Heart_Atrial_Appendage	31.7471	5.07366e-16	1.40495	-1.87257	2.5098	-0.380725	1.62245	4
ENSG00000259803.6	SLC22A31	0.00592266	49	3	0.000667832	Brain_Cerebellar_Hemisphere	0.917029	Cells_Cultured_fibroblasts	38.4488	1.11803e-15	3.28558	-1.65654	3.40246	1.39646	1.082	3
ENSG00000198722.14	UNC13B	0.00594849	17	5	0.01262	Brain_Cortex	0.8472	Ovary	9.87739	5.80866e-18	0.334038	-2.49432	1.08912	-0.893782	1.03758	5
ENSG00000127080.9	IPPK	0.00596613	43	4	0.0002609	Artery_Coronary	0.991226	Adipose_Visceral_Omentum	25.441	9.63998e-16	1.69642	-3.65132	3.65132	-0.00515558	1.6427	4
ENSG00000117407.16	ARTN	0.0059795	45	2	0.001199	Skin_Sun_Exposed_Lower_leg	0.0429551	Kidney_Cortex	38.514	6.16061e-16	4.18795	2.02415	3.23912	2.93386	0.32412	2
ENSG00000248905.8	FMN1	0.00599407	41	13	0.000516009	Brain_Anterior_cingulate_cortex_BA24	0.907379	Artery_Aorta	12.4581	9.67495e-16	0.685154	-3.47231	2.408	-1.08116	1.70206	13
ENSG00000139144.9	PIK3C2G	0.00600877	23	4	0.0108209	Lung	0.7387	Thyroid	19.4205	1.49752e-17	0.73464	-2.1801	2.54843	-0.615944	1.35509	4
ENSG00000153234.13	NR4A2	0.00602513	3	3	0.003687	Lung	0.4406	Stomach	1.25187	0.786001	0.786001	-2.90377	1.99732	-0.559208	2.45741	3
ENSG00000144815.15	NXPE3	0.0060261	47	5	5.50064e-05	Spleen	0.834938	Brain_Amygdala	30.7746	1.08373e-15	1.65849	-4.03327	3.107	-2.46288	1.31576	5
ENSG00000183615.5	FAM167B	0.00606884	42	2	0.00107	Kidney_Cortex	0.17534	Muscle_Skeletal	38.8397	6.06853e-16	1.80105	-3.27144	3.22132	-0.196609	3.11519	2
ENSG00000175040.5	CHST2	0.00608363	26	8	0.010069	Thyroid	0.952348	Small_Intestine_Terminal_Ileum	15.1668	3.29897e-16	0.590496	-2.57345	2.36334	7.83474e-05	1.06991	8
ENSG00000273449.1	RP11-218F10.3	0.0061382	49	2	0.007746	Kidney_Cortex	0.9534	Brain_Amygdala	46.5321	1.31219e-15	1.65933	0.0584377	2.66295	0.675782	0.626036	2
ENSG00000261996.1	CTC-281F24.1	0.00620469	38	5	0.00760963	Lung	0.906493	Skin_Not_Sun_Exposed_Suprapubic	20.7951	7.45189e-16	1.84099	-1.25777	2.66892	0.0515955	1.12934	5
ENSG00000054179.11	ENTPD2	0.00621405	37	7	0.00602139	Small_Intestine_Terminal_Ileum	0.756861	Cells_EBV-transformed_lymphocytes	21.7326	1.84155e-15	0.81937	-2.74661	2.66473	-0.995703	2.05732	7
ENSG00000084652.15	TXLNA	0.00623442	36	1	0.00643	Adipose_Subcutaneous	0.04354	Pancreas	35.0795	5.25142e-16	35.0795	-2.72501	2.72501	-2.25121	1.52621	1
ENSG00000119900.7	OGFRL1	0.0063963	44	8	0.00139665	Testis	0.894023	Nerve_Tibial	18.4071	5.45196e-16	0.631734	-2.25046	3.19534	0.419363	1.06629	8
ENSG00000196653.11	ZNF502	0.00640058	49	2	0.001244	Brain_Hypothalamus	0.360164	Heart_Left_Ventricle	45.4949	1.51028e-15	3.15061	-3.22859	-0.915052	-1.94129	0.645546	2
ENSG00000164209.16	SLC25A46	0.00643886	22	5	0.009412	Thyroid	0.9315	Pancreas	9.22228	2.50568e-18	0.877744	-0.547115	2.59671	0.304098	0.955955	5
ENSG00000271239.1	RP11-238F2.1	0.00647436	15	2	0.019366	Nerve_Tibial	0.97456	Adipose_Subcutaneous	14.2177	3.52385e-17	0.495285	-0.0318903	2.33841	2.1028	0.590994	2
ENSG00000082497.11	SERTAD4	0.00649497	17	6	0.003431	Brain_Cerebellar_Hemisphere	0.9242	Adipose_Visceral_Omentum	11.0601	6.63591e-18	0.540446	-2.92623	2.57735	-1.28634	2.06725	6
ENSG00000254532.1	RP11-624D11.2	0.00649833	5	3	0.00115542	Testis	0.5173	Brain_Putamen_basal_ganglia	2.53566	4.54922e-17	0.973924	-3.24966	3.21378	0.0691365	2.3737	3
ENSG00000173065.13	FAM222B	0.00663577	22	4	0.107	Brain_Anterior_cingulate_cortex_BA24	0.8694	Thyroid	18.1293	2.65764e-18	0.658402	-0.473631	1.61183	0.0578758	0.681407	4
ENSG00000136193.16	SCRN1	0.00664324	38	4	0.002413	Thyroid	0.9896	Brain_Cortex	27.3162	1.68988e-15	1.56302	-3.03404	1.50083	-0.164235	1.29608	4
ENSG00000124541.6	RRP36	0.00666398	31	3	0.0140401	Artery_Tibial	0.94	Brain_Cerebellar_Hemisphere	17.312	7.00197e-16	0.949406	-2.45624	0.41533	-0.94664	0.956645	3
ENSG00000108094.14	CUL2	0.00669044	20	2	0.002007	Artery_Aorta	0.8197	Adipose_Visceral_Omentum	14.3851	1.18665e-17	5.61494	-0.227931	3.08919	1.00564	1.38187	2
ENSG00000160783.19	PMF1	0.0066996	35	2	0.05344	Brain_Anterior_cingulate_cortex_BA24	0.7006	Artery_Tibial	31.6548	1.09321e-15	2.84388	-0.384511	1.93135	1.31729	0.94737	2
ENSG00000283003.1	RP11-418I22.3	0.0067	1	1	0.0067	Testis	0.0067	Testis	1	1	1	2.7114	2.7114	2.7114	NA	1
ENSG00000102900.12	NUP93	0.00671434	35	5	0.01064	Kidney_Cortex	0.951714	Adipose_Subcutaneous	25.2384	9.54749e-16	0.848671	-2.55431	1.87598	0.245597	0.782497	5
ENSG00000130706.12	ADRM1	0.00691943	20	6	0.001255	Brain_Cortex	0.8485	Breast_Mammary_Tissue	11.5013	9.59966e-20	0.572103	-1.32915	3.22608	0.115221	1.54205	6
ENSG00000185559.13	DLK1	0.00698834	42	4	0.000343229	Brain_Frontal_Cortex_BA9	0.810901	Heart_Left_Ventricle	31.6627	2.51195e-16	1.06012	-3.58028	2.99399	-0.506893	2.66115	4
ENSG00000267780.2	RP11-154H12.3	0.00704821	2	2	0.009687	Testis	0.068414	Whole_Blood	1.01097	0.989025	0.989025	-2.58681	1.82227	-0.382268	3.11769	2
ENSG00000026652.13	AGPAT4	0.00707032	46	10	0.000469477	Cells_EBV-transformed_lymphocytes	0.951089	Thyroid	23.1505	1.98925e-15	0.793126	-3.49759	1.42462	-0.140699	1.10476	10
ENSG00000131634.13	TMEM204	0.00715249	46	3	0.00134832	Brain_Cerebellum	0.6218	Uterus	34.5717	1.55329e-15	3.00033	-3.20549	3.07486	-2.41282	1.20754	3
ENSG00000145088.8	EAF2	0.0071764	48	4	0.0391917	Brain_Amygdala	0.964563	Esophagus_Gastroesophageal_Junction	29.8938	6.06311e-16	1.51206	-1.81579	2.06217	0.0440244	1.30081	4
ENSG00000167881.14	SRP68	0.00718422	15	4	0.006281	Kidney_Cortex	0.1778	Lung	10.8819	3.03796e-17	0.673506	-2.73274	2.4805	1.50586	1.6149	4
ENSG00000204869.8	IGFL4	0.00721247	16	3	0.1249	Pituitary	0.739827	Brain_Cortex	14.2688	3.949e-18	0.709151	-1.53453	0.906824	0.555089	0.744268	3
ENSG00000185811.16	IKZF1	0.00728545	30	2	0.001255	Heart_Atrial_Appendage	0.0299	Brain_Hypothalamus	28.2624	1.20103e-15	0.960168	-3.22608	2.17141	-2.80845	0.955122	2
ENSG00000123815.11	COQ8B	0.00729459	45	6	0.01208	Breast_Mammary_Tissue	0.922612	Esophagus_Mucosa	19.6292	5.323e-16	0.745723	-2.5098	2.5098	0.161246	1.56224	6
ENSG00000163638.13	ADAMTS9	0.00733486	9	5	0.01994	Esophagus_Muscularis	0.8334	Brain_Hypothalamus	5.45125	9.52738e-20	0.508303	-2.32748	0.334105	-0.703452	0.969942	5
ENSG00000239513.5	LINC01210	0.007382	1	1	0.007382	Testis	0.007382	Testis	1	1	1	-2.6791	-2.6791	-2.6791	NA	1
ENSG00000104953.19	TLE6	0.00743022	45	4	0.000953613	Brain_Frontal_Cortex_BA9	0.878235	Thyroid	35.0846	1.53918e-15	1.94667	-3.09157	3.30387	-1.54585	1.22122	4
ENSG00000173662.20	TAS1R1	0.00744826	38	1	0.0009739	Artery_Tibial	0.093397	Testis	37.5836	5.90991e-16	37.5836	-3.29796	3.29796	1.27871	2.45093	1
ENSG00000163704.11	PRRT3	0.0074569	14	3	0.009104	Muscle_Skeletal	0.1454	Whole_Blood	10.5254	1.85519e-17	1.48037	-2.51391	2.60812	1.20898	1.48154	3
ENSG00000223501.8	VPS52	0.00745846	47	3	0.00389194	Artery_Tibial	0.962312	Prostate	31.9949	7.8585e-16	1.20665	-2.88679	0.165998	-2.0097	0.91146	3
ENSG00000142327.12	RNPEPL1	0.0074694	21	4	0.0185	Artery_Tibial	0.707702	Heart_Atrial_Appendage	14.485	1.15186e-17	1.29266	-2.35546	2.30979	0.821611	1.51752	4
ENSG00000154781.15	CCDC174	0.00747308	46	2	0.00164748	Whole_Blood	0.804538	Adipose_Visceral_Omentum	35.8607	5.7386e-16	7.23746	-0.294076	3.14737	1.95237	0.82384	2
ENSG00000025800.13	KPNA6	0.00750098	34	1	0.006723	Adipose_Subcutaneous	0.315972	Muscle_Skeletal	33.7806	1.023e-15	33.7806	1.00277	2.71026	2.66004	0.292833	1
ENSG00000154646.8	TMPRSS15	0.007506	1	1	0.007506	Testis	0.007506	Testis	1	1	1	2.67352	2.67352	2.67352	NA	1
ENSG00000197888.2	UGT2B17	0.00753415	8	6	0.0001645	Liver	0.7573	Brain_Substantia_nigra	4.83727	1.42634e-17	0.19877	-0.309028	3.76809	2.1097	1.21953	6
ENSG00000166823.5	MESP1	0.00760697	41	5	0.000259157	Brain_Amygdala	0.8972	Adipose_Visceral_Omentum	18.391	6.02462e-16	0.964221	-3.19178	3.65304	0.163716	2.11989	5
ENSG00000054219.10	LY75	0.00769857	48	2	0.002024	Skin_Not_Sun_Exposed_Suprapubic	0.849846	Brain_Spinal_cord_cervical_c-1	44.7891	8.78816e-16	2.62665	-3.08669	0.272767	-1.47396	0.608684	2
ENSG00000262165.2	RP11-81A22.5	0.00772136	46	2	0.0338	Adrenal_Gland	0.99735	Brain_Cerebellum	41.7421	1.02241e-15	3.27256	-2.12245	1.56706	-0.0680594	0.891846	2
ENSG00000142731.10	PLK4	0.00773511	12	2	0.002179	Skin_Sun_Exposed_Lower_leg	0.7316	Adipose_Subcutaneous	10.7867	1.9644e-17	0.99961	0.342998	3.06468	0.807531	0.749206	2
ENSG00000036448.9	MYOM2	0.00773642	48	9	0.00334223	Ovary	0.976262	Heart_Atrial_Appendage	28.6886	2.8127e-15	0.982377	-2.93437	1.39083	-1.14012	1.18614	9
ENSG00000148948.7	LRRC4C	0.00775564	2	2	0.002563	Adipose_Visceral_Omentum	0.3413	Esophagus_Muscularis	1.05407	0.945928	0.945928	-3.0158	-0.9516	-1.9837	1.45961	2
ENSG00000126067.11	PSMB2	0.00775683	47	2	0.00240922	Uterus	0.975279	Brain_Frontal_Cortex_BA9	37.0982	8.69027e-16	9.90179	-0.708395	3.03452	1.40317	1.08674	2
ENSG00000170835.14	CEL	0.00785804	7	4	0.003783	Lung	0.2662	Adipose_Visceral_Omentum	5.06144	3.49208e-17	0.27649	-2.89571	1.56964	-0.670674	1.64488	4
ENSG00000181873.12	IBA57	0.00785933	37	2	0.001997	Brain_Caudate_basal_ganglia	0.175321	Artery_Coronary	27.3786	4.4523e-16	8.47993	-3.09068	3.09068	-0.509301	2.48572	2
ENSG00000167103.11	PIP5KL1	0.00786296	42	4	0.0025959	Esophagus_Mucosa	0.9495	Artery_Aorta	28.2553	1.20049e-15	0.994593	-1.93614	3.01193	-0.492185	1.19811	4
ENSG00000173083.14	HPSE	0.0078803	22	10	0.000348681	Esophagus_Gastroesophageal_Junction	0.7397	Artery_Tibial	7.3145	7.96502e-18	0.266191	-0.745781	3.57616	1.77103	1.21526	10
ENSG00000090020.10	SLC9A1	0.00792303	43	2	0.01316	Brain_Amygdala	0.99187	Vagina	35.0705	3.4161e-15	6.70687	-2.47941	2.47941	-0.0493412	1.36578	2
ENSG00000226921.6	LINC00454	0.007939	1	1	0.007939	Testis	0.007939	Testis	1	1	1	2.65465	2.65465	2.65465	NA	1
ENSG00000140564.11	FURIN	0.0079717	41	7	0.00620412	Brain_Cerebellum	0.962	Adipose_Visceral_Omentum	23.9615	1.174e-15	1.00819	-2.63917	2.73679	0.279294	0.941644	7
ENSG00000198865.9	CCDC152	0.00797355	44	4	0.0003241	Liver	0.8687	Adrenal_Gland	31.4401	4.0877e-16	1.10621	-1.76144	3.59523	-1.04625	0.919938	4
ENSG00000197818.11	SLC9A8	0.00806224	47	7	0.0025948	Esophagus_Gastroesophageal_Junction	0.918535	Testis	23.2624	5.53702e-16	0.982167	-1.94522	3.01206	0.861236	1.1478	7
ENSG00000137573.13	SULF1	0.00807118	28	6	0.000726052	Nerve_Tibial	0.9612	Skin_Not_Sun_Exposed_Suprapubic	13.533	1.27352e-15	0.635039	-3.37955	0.0486478	-1.23061	0.827117	6
ENSG00000180305.4	WFDC10A	0.008072	1	1	0.008072	Brain_Cortex	0.008072	Brain_Cortex	1	1	1	-2.64904	-2.64904	-2.64904	NA	1
ENSG00000142235.8	LMTK3	0.00807682	5	4	0.06164	Artery_Aorta	0.844	Heart_Left_Ventricle	3.25048	0.0213933	0.205763	-0.477368	1.86888	0.514352	0.874157	4
ENSG00000108001.13	EBF3	0.00811596	30	6	0.00521945	Muscle_Skeletal	0.8039	Adipose_Visceral_Omentum	17.0987	6.8739e-16	0.822136	-1.95387	2.79317	-0.514927	0.929613	6
ENSG00000005486.16	RHBDD2	0.00811803	36	5	0.00235094	Pituitary	0.9702	Thyroid	21.4681	2.09615e-15	1.16759	-3.0419	1.75255	-1.43799	0.944743	5
ENSG00000187098.14	MITF	0.00812812	28	6	0.0005533	Spleen	0.6181	Brain_Cerebellar_Hemisphere	17.1352	1.02482e-15	0.680668	-3.45353	2.04444	-0.0794343	1.29159	6
ENSG00000170791.17	CHCHD7	0.008138	5	1	0.008138	Artery_Tibial	0.008138	Liver	5	9.29571e-17	5	-2.64629	2.64629	0.529258	2.89887	1
ENSG00000196735.11	HLA-DQA1	0.0081483	41	6	0.0002913	Whole_Blood	0.976759	Brain_Nucleus_accumbens_basal_ganglia	23.2019	1.00892e-15	1.0703	0.0291322	3.62292	1.76028	1.03863	6
ENSG00000075884.13	ARHGAP15	0.00817504	38	5	0.03855	Thyroid	0.9513	Heart_Left_Ventricle	28.0282	5.28226e-16	0.988173	-1.66672	2.06896	-0.95388	1.25206	5
ENSG00000240708.1	LINC02030	0.00819072	4	3	0.0503735	Testis	0.7691	Skin_Sun_Exposed_Lower_leg	3.22887	0.0530455	0.152621	-0.443091	1.95678	0.780116	1.32771	3
ENSG00000154760.13	SLFN13	0.00824301	47	10	0.00747134	Breast_Mammary_Tissue	0.936058	Pancreas	15.3718	1.2524e-15	0.586009	-2.51332	2.67507	-0.162026	1.2441	10
ENSG00000127586.16	CHTF18	0.00825274	39	4	0.008986	Kidney_Cortex	0.9966	Brain_Cerebellum	29.1385	1.14594e-15	1.15665	-2.61259	1.52966	-0.150085	0.864956	4
ENSG00000220201.7	ZGLP1	0.00825814	45	4	0.000265988	Thyroid	1	Small_Intestine_Terminal_Ileum	36.179	3.44641e-15	1.52266	-3.64635	2.90612	-2.5041	1.28327	4
ENSG00000130429.12	ARPC1B	0.0082938	48	3	0.00155204	Brain_Hippocampus	0.8651	Artery_Aorta	30.39	1.22243e-15	7.14038	-3.16477	2.43557	-1.35364	1.29171	3
ENSG00000260792.1	RP11-982M15.8	0.0083721	3	3	0.165	Cells_EBV-transformed_lymphocytes	0.9295	Brain_Frontal_Cortex_BA9	2.42752	0.0880685	0.0880685	-0.418338	1.38845	0.293879	0.962168	3
ENSG00000166794.4	PPIB	0.00837527	45	2	0.000950614	Ovary	0.654428	Lung	30.5401	5.42738e-16	14.4599	-2.53953	3.30475	1.67479	1.7448	2
ENSG00000177363.4	LRRN4CL	0.008403	9	1	0.008403	Esophagus_Gastroesophageal_Junction	0.008403	Adipose_Subcutaneous	9	6.16795e-17	9	2.63543	2.63543	2.63543	3.51083e-16	1
ENSG00000237797.1	RP11-472N13.3	0.00842563	14	2	0.01947	Artery_Coronary	0.841876	Heart_Atrial_Appendage	11.9219	1.56858e-17	1.73132	-0.9922	2.33641	-0.00633497	1.29454	2
ENSG00000172053.17	QARS	0.008435	7	1	0.008435	Artery_Coronary	0.008435	Adipose_Subcutaneous	7	1.6159e-32	7	-2.63414	2.63414	-1.12892	2.57066	1
ENSG00000143954.12	REG3G	0.00849735	24	4	0.009452	Liver	0.6342	Esophagus_Mucosa	11.692	1.67358e-18	1.27315	-2.59526	2.00073	0.675989	1.39161	4
ENSG00000198952.8	SMG5	0.00856756	43	2	0.005347	Small_Intestine_Terminal_Ileum	0.9146	Brain_Frontal_Cortex_BA9	35.6469	4.77468e-16	6.88127	-2.78535	1.32711	-1.13249	1.14448	2
ENSG00000197361.7	FBXL22	0.00857601	45	3	0.061799	Brain_Frontal_Cortex_BA9	0.989101	Stomach	32.1143	2.77689e-15	2.30258	-1.32491	1.86774	0.619065	1.0637	3
ENSG00000154370.15	TRIM11	0.00862356	22	3	0.01397	Brain_Cerebellum	0.32	Thyroid	17.1767	2.25313e-19	1.21153	0.994458	2.45803	2.08936	0.343755	3
ENSG00000259957.2	RP11-491F9.8	0.00866489	4	3	0.002431	Testis	0.9696	Pituitary	3.05843	0.0554002	0.171423	-3.0318	0.03811	-1.19132	1.34141	3
ENSG00000245468.3	RP11-367J11.3	0.00868875	48	2	0.01102	Adipose_Subcutaneous	0.7137	Brain_Cerebellar_Hemisphere	42.2697	1.05636e-15	2.11811	-2.54206	0.366891	-1.77259	0.647557	2
ENSG00000179152.19	TCAIM	0.00869434	48	5	0.000151998	Artery_Tibial	0.748682	Esophagus_Mucosa	28.3885	7.35241e-16	1.24598	-3.78778	3.37198	-1.73453	2.04035	5
ENSG00000008196.12	TFAP2B	0.00872681	14	4	0.0004105	Prostate	0.1911	Colon_Sigmoid	7.8143	1.30061e-18	0.645055	-1.37984	3.53324	1.65934	1.06057	4
ENSG00000146039.10	SLC17A4	0.0087901	4	4	0.04169	Colon_Sigmoid	0.9232	Kidney_Cortex	1.96713	0.0964547	0.0964547	-2.0366	0.591777	-0.446531	1.14036	4
ENSG00000077458.12	FAM76B	0.00880669	32	3	0.09838	Brain_Cerebellum	0.9296	Brain_Cerebellar_Hemisphere	17.576	5.70686e-16	0.805934	-1.65276	0.488635	-0.350967	0.521698	3
ENSG00000131584.18	ACAP3	0.00888275	38	4	0.04662	Brain_Putamen_basal_ganglia	0.768495	Testis	29.244	4.75161e-16	1.07314	-1.98974	1.98974	0.706087	1.18416	4
ENSG00000231496.1	RP1-251M9.2	0.008958	1	1	0.008958	Testis	0.008958	Testis	1	1	1	2.61365	2.61365	2.61365	NA	1
ENSG00000147434.8	CHRNA6	0.008966	2	1	0.008966	Brain_Cerebellar_Hemisphere	0.008966	Brain_Cerebellar_Hemisphere	2	0	2	2.61335	2.61335	2.61335	0	1
ENSG00000131379.9	C3orf20	0.00900262	28	5	0.000996305	Muscle_Skeletal	0.7338	Skin_Not_Sun_Exposed_Suprapubic	19.2103	5.02542e-16	0.691468	-3.29157	2.1415	-1.95368	1.27108	5
ENSG00000180263.13	FGD6	0.00902581	45	9	0.00833537	Adipose_Visceral_Omentum	0.978447	Muscle_Skeletal	14.1853	8.77042e-16	0.537534	-1.80105	2.63817	-0.414384	0.955012	9
ENSG00000105143.12	SLC1A6	0.00902939	14	4	0.0056	Pituitary	0.9353	Skin_Not_Sun_Exposed_Suprapubic	10.2101	2.87089e-17	0.418404	-2.77033	0.552503	-0.899905	0.805095	4
ENSG00000274225.1	KB-68A7.1	0.00903102	36	6	0.000500623	Skin_Not_Sun_Exposed_Suprapubic	0.961	Brain_Cerebellar_Hemisphere	19.9488	1.81818e-15	0.774915	0.0488987	3.48042	1.73641	0.875259	6
ENSG00000243276.5	RP11-384F7.1	0.00904649	3	2	0.002295	Testis	0.9809	Pituitary	2.02042	1.84703e-18	0.97958	-3.04914	-0.0239406	-2.04074	1.7466	2
ENSG00000198677.10	TTC37	0.00917081	48	3	0.000654466	Pancreas	0.2471	Brain_Substantia_nigra	39.2909	7.33593e-16	2.11329	-3.40798	-1.15742	-2.26966	0.748825	3
ENSG00000142973.13	CYP4B1	0.00918996	30	3	0.0002102	Adipose_Visceral_Omentum	0.6566	Minor_Salivary_Gland	25.856	3.73957e-16	1.02789	-0.444612	3.70643	3.07836	0.801292	3
ENSG00000266010.1	GATA6-AS1	0.00919991	14	3	0.4959	Minor_Salivary_Gland	0.5721	Uterus	12.2119	3.03584e-18	0.440186	-0.680955	0.644425	-0.110326	0.667387	3
ENSG00000130175.9	PRKCSH	0.00921537	40	3	0.001119	Breast_Mammary_Tissue	0.5775	Heart_Atrial_Appendage	34.5683	9.22939e-16	1.75214	-3.25876	0.55704	-2.74692	0.741394	3
ENSG00000225873.3	LINC00694	0.00925415	48	1	0.00407019	Prostate	0.9398	Uterus	45.9307	3.33057e-15	45.9307	-2.87267	0.0755212	-2.52375	0.390083	1
ENSG00000155974.11	GRIP1	0.00928304	39	9	0.0005628	Nerve_Tibial	0.949409	Skin_Sun_Exposed_Lower_leg	17.5411	6.68438e-16	0.612565	-2.61008	3.44894	1.22379	1.04975	9
ENSG00000135052.16	GOLM1	0.00930769	49	6	0.000721361	Skin_Sun_Exposed_Lower_leg	0.90217	Stomach	17.1992	4.95132e-16	1.10792	-2.51082	3.38133	0.520987	1.73553	6
ENSG00000116863.10	ADPRHL2	0.00930942	46	2	0.00209356	Pancreas	0.70952	Skin_Sun_Exposed_Lower_leg	37.6931	8.95558e-16	8.30687	-3.07663	2.10433	-1.02038	1.6399	2
ENSG00000230839.1	RP5-968J1.1	0.00934081	15	2	0.1508	Brain_Substantia_nigra	0.76481	Breast_Mammary_Tissue	14.3203	7.84433e-20	0.505605	-1.28127	1.43671	-0.435243	0.580437	2
ENSG00000242781.1	LINC02050	0.00938	1	1	0.00938	Testis	0.00938	Testis	1	1	1	2.59788	2.59788	2.59788	NA	1
ENSG00000227467.3	LINC01537	0.00943812	36	7	0.04946	Brain_Cortex	0.865752	Brain_Substantia_nigra	15.5438	1.43673e-15	0.751613	-1.9646	1.93709	-0.237896	1.34975	7
ENSG00000179915.22	NRXN1	0.00945419	8	6	0.003711	Artery_Aorta	0.8035	Nerve_Tibial	3.76707	0.0123289	0.333549	-2.90174	1.43883	-0.37791	1.41045	6
ENSG00000163703.17	CRELD1	0.00945521	49	1	0.00664101	Cells_EBV-transformed_lymphocytes	0.4301	Pancreas	47.1594	1.95847e-15	47.1594	0.789021	2.71433	2.53378	0.312599	1
ENSG00000066135.12	KDM4A	0.0095625	17	6	0.01417	Adipose_Visceral_Omentum	0.6104	Heart_Atrial_Appendage	10.0184	2.0869e-18	0.419452	-2.45292	2.45292	-0.613037	1.46879	6
ENSG00000107281.9	NPDC1	0.00958843	48	2	0.000218602	Brain_Cortex	0.8489	Colon_Transverse	34.6204	3.24067e-15	11.501	-0.521814	3.69649	1.79543	1.15328	2
ENSG00000065029.14	ZNF76	0.00960018	18	2	0.02764	Adipose_Subcutaneous	0.9677	Colon_Transverse	16.6604	2.17582e-18	0.939376	-2.20236	1.05593	-1.59729	0.931086	2
ENSG00000148156.7	ACTL7B	0.00960388	3	3	0.01236	Testis	0.9712	Pituitary	1.79081	0.403975	0.403975	-0.437154	2.5017	0.700215	1.57797	3
ENSG00000151500.14	THYN1	0.00960978	46	4	0.000795359	Esophagus_Gastroesophageal_Junction	0.810697	Ovary	30.3677	8.16168e-16	1.75258	-3.3544	3.14322	-1.03838	2.41271	4
ENSG00000186827.10	TNFRSF4	0.00966977	29	3	0.002317	Brain_Nucleus_accumbens_basal_ganglia	0.8833	Thyroid	16.7803	7.20476e-16	0.991256	-3.04627	3.04627	-0.353201	1.96936	3
ENSG00000181562.4	EDDM3A	0.00972316	2	2	0.002432	Testis	0.8029	Kidney_Cortex	1.00826	0.99174	0.99174	-3.03168	-0.249596	-1.64064	1.96723	2
ENSG00000121691.4	CAT	0.0098027	49	4	0.0684631	Esophagus_Mucosa	0.999599	Prostate	39.8993	7.30931e-16	1.43742	-1.82195	0.935515	-0.503456	0.752621	4
ENSG00000138767.12	CNOT6L	0.00981544	48	3	0.00314585	Brain_Caudate_basal_ganglia	0.437816	Artery_Tibial	44.3041	1.18528e-15	1.6674	-1.321	2.95311	1.43149	0.612702	3
ENSG00000102786.14	INTS6	0.00982008	10	2	0.00309	Brain_Hypothalamus	0.6934	Brain_Putamen_basal_ganglia	8.7603	3.64197e-18	0.974483	-2.95864	0.954956	-0.268496	1.22507	2
ENSG00000258249.1	RP11-497G19.3	0.009871	1	1	0.009871	Cells_Cultured_fibroblasts	0.009871	Cells_Cultured_fibroblasts	1	1	1	2.58032	2.58032	2.58032	NA	1
ENSG00000114646.9	CSPG5	0.00993898	34	2	0.00193	Liver	0.6891	Esophagus_Mucosa	31.4597	6.64378e-16	2.49278	-3.1008	3.1008	-1.62261	2.37503	2
ENSG00000143536.7	CRNN	0.0099479	14	3	0.07817	Brain_Caudate_basal_ganglia	0.5464	Artery_Tibial	11.508	3.06906e-17	0.577735	-1.7614	1.7614	0.370536	1.05867	3
ENSG00000196943.12	NOP9	0.00995865	32	3	0.006329	Minor_Salivary_Gland	0.848	Lung	22.91	1.09205e-15	1.8522	-2.73023	2.73023	0.24914	1.4727	3
ENSG00000134326.11	CMPK2	0.01007	2	1	0.01007	Colon_Sigmoid	0.01007	Colon_Sigmoid	2	0	2	2.57342	2.57342	2.57342	0	1
ENSG00000174437.16	ATP2A2	0.0101064	28	3	0.001504	Small_Intestine_Terminal_Ileum	0.425	Esophagus_Gastroesophageal_Junction	17.0616	2.37424e-16	3.79081	-3.17391	3.17391	1.22443	1.41985	3
ENSG00000179344.16	HLA-DQB1	0.0101216	44	4	0.000453161	Adrenal_Gland	0.5036	Breast_Mammary_Tissue	29.6925	6.20775e-16	2.25227	-0.754915	3.50702	2.46026	0.938644	4
ENSG00000175727.13	MLXIP	0.0101935	22	5	0.01192	Cells_Cultured_fibroblasts	0.7111	Brain_Cerebellum	8.75595	4.7701e-18	1.01428	-2.5145	2.42472	-0.506946	1.57248	5
ENSG00000012504.13	NR1H4	0.0102616	2	2	0.005784	Pituitary	0.3655	Nerve_Tibial	1.1189	0.881095	0.881095	-2.75978	0.904935	-0.927423	2.59135	2
ENSG00000112964.13	GHR	0.010294	21	8	0.000450059	Artery_Tibial	0.9269	Colon_Transverse	6.27951	6.92695e-18	0.355662	-3.50884	1.5964	-0.337347	1.18156	8
ENSG00000174837.14	ADGRE1	0.0103039	30	6	0.00576412	Lung	0.646287	Whole_Blood	15.1052	1.35629e-15	0.609348	-2.76091	1.86651	0.448876	1.08338	6
ENSG00000261340.1	LINC01616	0.0103558	19	4	0.00305013	Breast_Mammary_Tissue	0.421358	Brain_Cerebellar_Hemisphere	9.50123	1.17026e-17	0.946461	-1.40743	2.96264	1.67862	1.2554	4
ENSG00000138375.12	SMARCAL1	0.0103562	47	3	0.00128585	Esophagus_Mucosa	0.928851	Brain_Hippocampus	36.5695	9.48527e-16	1.68663	-3.21912	1.57033	-0.477897	0.891571	3
ENSG00000118729.11	CASQ2	0.0103665	45	3	0.0099546	Artery_Aorta	0.726658	Artery_Tibial	28.4519	2.78548e-15	1.42792	-2.5774	1.43619	-0.371488	1.61102	3
ENSG00000104804.7	TULP2	0.0103815	41	3	0.008694	Brain_Hippocampus	0.965359	Lung	34.4014	6.86166e-16	1.93378	-2.62386	2.28352	-0.412087	0.806831	3
ENSG00000183798.4	EMILIN3	0.0103845	44	7	0.002148	Brain_Caudate_basal_ganglia	0.899079	Esophagus_Gastroesophageal_Junction	21.9311	2.12002e-15	0.768529	-3.06897	1.19841	-0.558476	1.13241	7
ENSG00000236700.5	LINC01010	0.0104097	18	3	0.002131	Testis	0.8568	Skin_Not_Sun_Exposed_Suprapubic	15.4771	2.52416e-17	0.645298	-3.07134	2.60001	0.642526	2.5609	3
ENSG00000125166.12	GOT2	0.0104715	46	4	0.0200335	Brain_Substantia_nigra	0.963732	Brain_Caudate_basal_ganglia	34.3686	8.78877e-16	1.2978	-1.4675	2.32572	0.433081	0.699568	4
ENSG00000096006.11	CRISP3	0.0104931	33	5	0.002002	Pancreas	0.641674	Whole_Blood	18.1392	4.24577e-16	0.787148	-3.08994	3.08994	-1.07826	1.56981	5
ENSG00000226887.7	ERVMER34-1	0.0105145	3	2	0.05541	Heart_Atrial_Appendage	0.5754	Esophagus_Mucosa	2.83743	3.08149e-33	0.16257	-1.91565	1.91565	0.186705	1.94275	2
ENSG00000160781.15	PAQR6	0.0105146	44	4	0.000526012	Kidney_Cortex	0.4975	Brain_Substantia_nigra	32.3998	3.1768e-15	1.1489	-3.46715	-0.678429	-2.10242	0.694682	4
ENSG00000186897.4	C1QL4	0.0105183	23	4	0.1404	Minor_Salivary_Gland	0.8862	Brain_Caudate_basal_ganglia	19.1783	1.41711e-17	0.847325	-1.4743	1.44842	-0.129891	0.871349	4
ENSG00000272338.2	RP11-722E23.2	0.010564	34	3	0.01695	Kidney_Cortex	0.487194	Brain_Amygdala	26.7919	1.1008e-15	0.997195	-1.04267	2.38779	1.27171	1.01748	3
ENSG00000163785.12	RYK	0.0105836	45	5	0.005448	Brain_Amygdala	0.631206	Stomach	20.9288	4.32535e-16	1.29255	-1.55814	2.77928	1.24385	1.21726	5
ENSG00000269199.1	AC003973.5	0.01069	1	1	0.01069	Testis	0.01069	Testis	1	1	1	-2.55267	-2.55267	-2.55267	NA	1
ENSG00000169288.17	MRPL1	0.0107427	20	2	0.00144265	Adipose_Subcutaneous	0.3881	Esophagus_Gastroesophageal_Junction	10.9935	2.6195e-17	8.45275	0.863068	3.18598	1.77839	0.888002	2
ENSG00000156873.15	PHKG2	0.0107631	22	3	0.008766	Adipose_Visceral_Omentum	0.9832	Brain_Nucleus_accumbens_basal_ganglia	12.1718	3.44257e-33	0.76561	-0.738847	2.62105	0.163898	0.788337	3
ENSG00000113580.14	NR3C1	0.010793	7	5	0.0200557	Esophagus_Mucosa	0.704308	Heart_Left_Ventricle	3.87662	4.23973e-17	0.435983	-2.3253	0.379512	-0.79571	0.799731	5
ENSG00000186448.14	ZNF197	0.0108039	45	2	0.01435	Artery_Coronary	0.880435	Esophagus_Mucosa	35.9658	3.53651e-15	6.39069	-2.44838	0.708827	-0.500022	1.14294	2
ENSG00000176340.3	COX8A	0.0108405	41	2	0.2307	Brain_Frontal_Cortex_BA9	0.9534	Brain_Nucleus_accumbens_basal_ganglia	38.2649	2.61587e-15	1.45085	-0.60046	1.19856	0.477646	0.597958	2
ENSG00000053900.10	ANAPC4	0.0108794	49	3	0.00511525	Brain_Frontal_Cortex_BA9	0.987763	Brain_Cortex	41.5914	1.07339e-15	1.58281	-0.0153379	2.79968	2.28152	0.598208	3
ENSG00000260220.6	CCDC187	0.0108966	3	3	0.005779	Brain_Spinal_cord_cervical_c-1	0.5634	Pancreas	2.14028	0.118127	0.118127	-2.62914	2.76006	0.236239	2.71079	3
ENSG00000241336.1	LINC01487	0.01093	1	1	0.01093	Testis	0.01093	Testis	1	1	1	-2.54493	-2.54493	-2.54493	NA	1
ENSG00000154511.11	FAM69A	0.0109325	48	5	0.0146581	Heart_Left_Ventricle	0.987811	Vagina	20.8811	5.91448e-16	1.13791	-2.26946	2.44072	0.397343	1.08845	5
ENSG00000278716.1	LA16c-352F7.1	0.0110389	27	2	0.0131893	Adrenal_Gland	0.5754	Esophagus_Muscularis	25.1841	1.2469e-15	1.12649	0.560116	2.47862	1.33593	0.568707	2
ENSG00000174640.12	SLCO2A1	0.0110956	37	7	0.0122797	Adrenal_Gland	0.958717	Esophagus_Muscularis	22.9831	2.83248e-16	1.0131	-2.06313	2.504	1.35365	1.27398	7
ENSG00000105393.15	BABAM1	0.0111542	47	3	0.0321608	Liver	0.989253	Brain_Hippocampus	38.7808	3.82375e-15	1.85347	-1.92603	2.14241	-0.831727	1.02054	3
ENSG00000106689.10	LHX2	0.0111621	11	3	0.02818	Heart_Left_Ventricle	0.9383	Brain_Amygdala	9.01964	8.43618e-18	0.957869	-2.15247	2.19477	-1.56487	1.39313	3
ENSG00000256783.1	RP11-503G7.1	0.0112048	2	2	0.0046636	Testis	0.6797	Pituitary	1.45675	0.543249	0.543249	-0.412873	2.8294	1.20826	2.29263	2
ENSG00000100601.9	ALKBH1	0.0112092	28	4	0.1771	Brain_Spinal_cord_cervical_c-1	0.963537	Testis	20.085	3.93405e-16	0.979094	-1.15669	1.34974	0.204712	0.773859	4
ENSG00000263874.2	LINC00672	0.0112868	47	7	0.0196248	Minor_Salivary_Gland	0.989264	Colon_Transverse	24.6001	7.91199e-16	0.957941	-1.95266	2.33344	-0.292449	1.0095	7
ENSG00000197299.10	BLM	0.0113045	4	3	0.01856	Kidney_Cortex	0.08679	Lung	2.14673	0	0.856903	-2.35425	1.90408	0.743746	2.0673	3
ENSG00000226488.1	LINC01824	0.0114	1	1	0.0114	Testis	0.0114	Testis	1	1	1	-2.53019	-2.53019	-2.53019	NA	1
ENSG00000188185.11	LINC00265	0.0114476	47	2	0.008517	Cells_EBV-transformed_lymphocytes	0.971	Adipose_Visceral_Omentum	44.0301	1.07444e-15	1.73639	-2.63086	0.645213	-0.170837	0.576184	2
ENSG00000275542.1	RP11-455O6.9	0.0114563	36	4	0.00233991	Adipose_Subcutaneous	0.87809	Muscle_Skeletal	26.5603	1.5488e-15	1.52586	-3.04331	1.22825	-0.484997	1.25435	4
ENSG00000110344.9	UBE4A	0.0115171	48	3	0.00617909	Small_Intestine_Terminal_Ileum	0.949703	Brain_Anterior_cingulate_cortex_BA24	26.651	1.34012e-15	9.12529	-2.73812	1.76807	-0.64529	1.48497	3
ENSG00000053702.14	NRIP2	0.0115276	31	4	0.003012	Spleen	0.830776	Nerve_Tibial	25.0301	2.38153e-16	0.870492	-2.96651	1.61183	0.187225	1.34923	4
ENSG00000185689.15	C6orf201	0.0115814	48	4	0.0105303	Whole_Blood	0.996024	Brain_Cerebellum	35.1207	7.99556e-16	1.3936	-2.55791	0.5188	-1.04516	0.734341	4
ENSG00000143079.14	CTTNBP2NL	0.0115827	36	4	0.01229	Brain_Putamen_basal_ganglia	0.9882	Colon_Transverse	25.9073	6.30332e-16	1.85365	-2.50371	1.43953	-0.267213	1.22197	4
ENSG00000171206.13	TRIM8	0.0115934	29	5	0.03436	Liver	0.9596	Breast_Mammary_Tissue	19.5289	2.70555e-16	0.728917	-0.723293	2.11582	0.13252	0.780649	5
ENSG00000123689.5	G0S2	0.01164	35	3	0.1388	Artery_Aorta	0.925634	Adipose_Subcutaneous	30.5848	8.19863e-16	1.21711	-1.48027	1.40564	0.342274	0.711574	3
ENSG00000230523.1	LINC01756	0.01166	1	1	0.01166	Testis	0.01166	Testis	1	1	1	2.52227	2.52227	2.52227	NA	1
ENSG00000231815.1	AC007179.1	0.0117702	1	1	0.0117702	Testis	0.0117702	Testis	1	1	1	-2.51896	-2.51896	-2.51896	NA	1
ENSG00000104904.12	OAZ1	0.0117876	22	4	0.07203	Brain_Anterior_cingulate_cortex_BA24	0.9473	Prostate	16.1732	1.01624e-18	0.584563	-0.239781	1.79893	1.38043	0.726187	4
ENSG00000180447.6	GAS1	0.011812	35	3	0.004243	Brain_Nucleus_accumbens_basal_ganglia	0.3721	Lung	27.38	1.59744e-15	1.09967	-1.94832	2.85951	-0.599947	1.08826	3
ENSG00000162009.8	SSTR5	0.0118752	7	6	0.06362	Testis	0.857465	Artery_Aorta	2.62851	0.000134419	0.113423	-1.85483	0.855996	-0.40558	1.14635	6
ENSG00000176692.5	FOXC2	0.0118883	14	14	0.06048	Colon_Sigmoid	0.9748	Artery_Aorta	3.22347	0.110364	0.110364	-1.87728	1.85497	0.0898111	1.21106	14
ENSG00000273356.1	LINC02019	0.0118986	49	2	0.000105044	Adipose_Subcutaneous	0.856142	Thyroid	45.9112	2.15578e-15	1.57186	-1.37736	3.87864	2.78862	0.984569	2
ENSG00000175106.16	TVP23C	0.0119079	34	3	0.007829	Heart_Atrial_Appendage	0.97939	Nerve_Tibial	27.4126	2.66513e-15	1.43303	-2.65936	1.95064	0.196751	1.18934	3
ENSG00000250596.1	RP11-440I14.2	0.0119085	18	4	0.0152739	Esophagus_Muscularis	0.7452	Liver	14.8435	3.85975e-17	0.559584	-2.42582	0.324975	-1.50662	0.750829	4
ENSG00000179454.13	KLHL28	0.011929	37	3	0.005086	Esophagus_Gastroesophageal_Junction	0.3661	Heart_Atrial_Appendage	32.8711	5.88008e-16	1.94894	-2.80154	2.80154	0.350623	2.17284	3
ENSG00000104946.12	TBC1D17	0.0119936	42	5	0.00638224	Adrenal_Gland	0.9218	Cells_Cultured_fibroblasts	20.5294	5.16384e-16	0.754731	-2.72747	2.59876	-0.555788	1.73442	5
ENSG00000130477.15	UNC13A	0.0119952	27	6	0.0306709	Adipose_Visceral_Omentum	0.8343	Thyroid	21.6954	1.21556e-15	0.815715	-2.16132	2.00531	-1.42303	0.78695	6
ENSG00000158816.15	VWA5B1	0.0120212	11	5	0.000362557	Lung	0.8217	Heart_Atrial_Appendage	6.11659	3.6989e-17	0.278	-3.56594	3.36103	-1.48306	2.09503	5
ENSG00000174885.12	NLRP6	0.0120352	34	4	0.0117189	Whole_Blood	0.80659	Liver	23.1111	2.24117e-15	1.11591	-2.5205	2.19596	-0.676096	1.28177	4
ENSG00000236387.1	RP11-307O10.1	0.0121149	1	1	0.0121149	Testis	0.0121149	Testis	1	1	1	-2.50878	-2.50878	-2.50878	NA	1
ENSG00000185453.12	C19orf68	0.0121358	15	3	0.01532	Thyroid	0.8351	Adipose_Subcutaneous	9.25351	6.06598e-18	0.937313	-2.42472	2.27244	-0.868856	1.60963	3
ENSG00000244459.2	RP11-1398P2.1	0.012166	17	10	0.00222636	Lung	0.9976	Colon_Sigmoid	5.87402	7.09611e-18	0.32429	-3.05825	2.85431	-0.181045	1.59693	10
ENSG00000169570.9	DTWD2	0.0121933	48	2	0.0105223	Skin_Not_Sun_Exposed_Suprapubic	0.051403	Brain_Cerebellum	44.3838	4.38571e-15	2.10425	-2.55818	-1.9481	-2.14208	0.198929	2
ENSG00000244242.1	IFITM10	0.0121999	46	5	0.0003908	Stomach	0.9769	Brain_Amygdala	23.5328	1.27899e-15	0.968485	-0.23475	3.54622	1.53647	1.11147	5
ENSG00000162873.14	KLHDC8A	0.0122036	27	4	0.00834196	Brain_Hypothalamus	0.9983	Adrenal_Gland	15.3104	5.58069e-16	1.41876	-2.49544	2.63791	0.24495	1.29155	4
ENSG00000163472.18	TMEM79	0.0122865	38	3	0.00890586	Whole_Blood	0.977037	Heart_Left_Ventricle	31.5334	2.68207e-15	2.04116	-2.61565	0.182393	-0.332442	0.827863	3
ENSG00000243678.11	NME2	0.0123005	49	4	0.0111572	Brain_Nucleus_accumbens_basal_ganglia	0.878563	Adrenal_Gland	39.0155	1.26949e-15	1.42838	-1.95757	2.53774	0.790588	0.961698	4
ENSG00000175455.14	CCDC14	0.012338	14	5	0.01592	Artery_Tibial	0.904	Adrenal_Gland	6.17134	7.99131e-33	0.239294	-2.41074	1.38517	-0.886443	1.5018	5
ENSG00000108219.14	TSPAN14	0.0123394	39	8	0.000114745	Artery_Tibial	0.877419	Testis	14.6775	3.16935e-16	0.569667	-2.31579	3.85709	1.12113	1.29811	8
ENSG00000167523.13	SPATA33	0.0123597	27	4	0.0538047	Whole_Blood	0.9243	Brain_Anterior_cingulate_cortex_BA24	17.6778	7.27581e-16	1.04944	-1.79009	1.92841	0.578732	1.05815	4
ENSG00000134107.4	BHLHE40	0.0124114	12	5	0.001308	Adrenal_Gland	0.8699	Thyroid	5.93701	2.40435e-18	0.215178	-3.21422	3.21422	-0.926717	1.9771	5
ENSG00000174799.10	CEP135	0.012523	33	5	0.003493	Colon_Sigmoid	0.8668	Brain_Amygdala	17.8695	1.7103e-15	0.644273	-2.92065	2.63811	-0.126808	1.23518	5
ENSG00000171450.5	CDK5R2	0.01255	15	1	0.01255	Esophagus_Gastroesophageal_Junction	0.01255	Adrenal_Gland	15	8.84565e-18	15	-2.49629	2.49629	0.499258	2.5317	1
ENSG00000116580.18	GON4L	0.0125923	32	3	0.002094	Artery_Tibial	0.416419	Esophagus_Gastroesophageal_Junction	28.3835	1.98959e-15	0.973598	-3.07657	2.17194	-0.253237	2.25617	3
ENSG00000186998.15	EMID1	0.0126236	46	8	0.0174373	Heart_Left_Ventricle	0.947333	Cells_EBV-transformed_lymphocytes	15.462	8.53935e-16	0.714212	-1.78071	2.37735	0.548911	1.18971	8
ENSG00000117266.15	CDK18	0.0126378	44	11	0.003818	Cells_Cultured_fibroblasts	0.761497	Brain_Caudate_basal_ganglia	12.8212	2.14275e-16	0.662518	-2.01304	2.89282	-0.0817011	1.21422	11
ENSG00000146966.12	DENND2A	0.0126397	29	4	0.07448	Brain_Hypothalamus	0.8953	Esophagus_Muscularis	20.8463	3.95126e-16	0.809162	-1.78365	1.78365	-0.191945	1.10254	4
ENSG00000150526.12	MIA2	0.0126405	5	2	0.005865	Cells_Cultured_fibroblasts	0.02235	Prostate	3.74494	1.57998e-18	1.1641	-2.75523	-2.28437	-2.48057	0.238568	2
ENSG00000179886.5	TIGD5	0.0127333	27	8	0.001037	Esophagus_Muscularis	0.946	Artery_Tibial	8.66941	7.52882e-16	0.328556	-1.47097	3.28029	0.662477	1.41943	8
ENSG00000078725.12	BRINP1	0.0127435	41	5	0.0003601	Brain_Cerebellar_Hemisphere	0.974842	Kidney_Cortex	21.3143	7.05738e-16	0.778194	-3.56772	3.56772	0.615002	2.19298	5
ENSG00000268655.2	CTB-60B18.10	0.0128203	27	3	0.00118143	Muscle_Skeletal	0.8684	Adrenal_Gland	22.9068	4.52046e-16	0.968409	-3.03643	3.24333	2.30377	1.9551	3
ENSG00000184347.14	SLIT3	0.012937	11	6	0.006583	Adrenal_Gland	0.926519	Prostate	4.93165	3.77059e-17	0.183445	-2.71723	2.3559	-0.473236	1.3726	6
ENSG00000092847.11	2001-08-01	0.0129806	44	2	0.06897	Brain_Hypothalamus	0.9688	Breast_Mammary_Tissue	39.8175	6.39321e-16	4.13037	-0.422171	1.81862	1.25992	0.895522	2
ENSG00000231107.1	LINC01508	0.012984	16	3	0.027534	Nerve_Tibial	0.936234	Pituitary	10.9441	1.69058e-17	0.391387	-1.31551	2.20386	0.732127	1.07078	3
ENSG00000244687.11	UBE2V1	0.0130205	43	3	0.001528	Brain_Cerebellar_Hemisphere	0.9335	Artery_Tibial	28.1022	5.12614e-16	4.25238	-3.16931	0.707751	-0.839682	1.27631	3
ENSG00000271327.1	RP11-1109F11.3	0.0130217	37	3	0.001185	Brain_Amygdala	0.873901	Liver	18.0958	6.54167e-16	3.51392	-3.24247	3.24247	0.290439	2.10898	3
ENSG00000223547.9	ZNF844	0.0130624	43	3	0.00201539	Pituitary	0.9205	Artery_Tibial	22.1471	6.86567e-16	3.00602	-3.08796	2.50834	-1.42229	1.84904	3
ENSG00000005073.5	HOXA11	0.0130855	6	2	0.01865	Adipose_Subcutaneous	0.08895	Cells_Cultured_fibroblasts	4.00352	6.79972e-19	1.99648	-1.70096	2.35245	1.00132	2.09318	2
ENSG00000122852.14	SFTPA1	0.0131015	13	2	0.00366	Brain_Putamen_basal_ganglia	0.1175	Lung	12.1621	7.15685e-19	0.837908	-2.90607	2.90607	1.90876	2.16851	2
ENSG00000107949.16	BCCIP	0.0131856	34	1	0.004731	Nerve_Tibial	0.02246	Colon_Sigmoid	33.5305	6.57895e-16	33.5305	-2.8248	2.56358	-2.04288	1.40294	1
ENSG00000156398.12	SFXN2	0.0131857	42	3	0.004634	Adipose_Subcutaneous	0.822938	Muscle_Skeletal	26.8078	8.16597e-16	5.9799	-2.83143	1.62717	-1.53664	1.37454	3
ENSG00000186020.12	ZNF529	0.0132373	46	5	0.00356198	Whole_Blood	0.9112	Minor_Salivary_Gland	24.5512	1.35472e-15	0.953276	-2.91455	-0.111525	-2.07768	0.853512	5
ENSG00000103811.15	CTSH	0.0132402	47	4	0.00297877	Ovary	0.9382	Brain_Amygdala	30.0861	2.9062e-15	1.4741	-2.96992	1.30293	-1.13733	0.899594	4
ENSG00000255660.1	RERG-AS1	0.01328	2	1	0.01328	Kidney_Cortex	0.01328	Uterus	2	0	2	-2.47617	-2.47617	-2.47617	6.28037e-16	1
ENSG00000257756.5	RP11-776A13.3	0.0133149	3	3	0.0117883	Testis	0.654864	Skin_Not_Sun_Exposed_Suprapubic	2.32251	0.19004	0.19004	-0.447015	2.51842	0.885434	1.50539	3
ENSG00000059588.9	TARBP1	0.0133307	49	6	0.00321189	Esophagus_Mucosa	0.898285	Spleen	25.267	6.31626e-16	1.50614	-1.41946	2.9467	0.593837	1.12524	6
ENSG00000273143.1	RP11-525A16.4	0.0133592	8	4	0.004884	Skin_Sun_Exposed_Lower_leg	0.9406	Brain_Cerebellum	5.39391	6.90246e-17	0.523191	-0.882703	2.81459	0.186962	1.13898	4
ENSG00000140044.12	JDP2	0.0133712	6	5	0.002032	Esophagus_Gastroesophageal_Junction	0.9577	Breast_Mammary_Tissue	2.24543	3.80108e-18	0.490926	-0.512073	3.08552	1.48251	1.53128	5
ENSG00000235815.1	RP1-125N5.2	0.0134053	1	1	0.0134053	Testis	0.0134053	Testis	1	1	1	-2.47282	-2.47282	-2.47282	NA	1
ENSG00000141449.14	GREB1L	0.0134096	12	1	0.01328	Artery_Tibial	0.01715	Brain_Hippocampus	11.886	1.04719e-17	11.886	-2.47617	2.47617	2.04803	1.4252	1
ENSG00000137161.16	CNPY3	0.0135708	34	4	0.0006601	Adipose_Visceral_Omentum	0.9889	Adrenal_Gland	22.8104	1.09105e-15	1.42205	-3.40564	3.40564	-0.443829	2.72905	4
ENSG00000087074.7	PPP1R15A	0.0135724	34	4	0.01023	Colon_Sigmoid	0.9385	Artery_Aorta	22.0141	6.30011e-16	0.953915	-2.56796	2.56796	-0.467898	1.88998	4
ENSG00000160233.7	LRRC3	0.0136337	47	4	0.00133213	Brain_Cortex	0.4966	Ovary	32.2305	3.16433e-15	2.01346	-1.38196	3.20897	2.237	0.982281	4
ENSG00000186654.20	PRR5	0.0136567	17	10	0.00388859	Lung	0.881879	Brain_Hypothalamus	6.9954	5.25829e-18	0.325509	-2.88706	0.761765	-1.83041	0.999638	10
ENSG00000270761.1	RP11-385F7.1	0.0136647	47	2	0.00202845	Small_Intestine_Terminal_Ileum	0.197873	Testis	44.0092	2.14928e-15	2.14121	1.28764	3.08604	2.71855	0.381566	2
ENSG00000198715.11	GLMP	0.0137525	38	2	0.008781	Brain_Cerebellar_Hemisphere	0.9416	Brain_Amygdala	31.9136	5.72384e-16	4.98331	-2.62046	-0.073259	-0.833589	0.971972	2
ENSG00000167100.14	SAMD14	0.0138051	41	3	0.006859	Brain_Frontal_Cortex_BA9	0.871403	Artery_Tibial	24.6832	2.34512e-15	2.88714	-1.38615	2.70361	0.301916	1.69234	3
ENSG00000197635.9	DPP4	0.0138095	38	4	0.000520931	Lung	0.7676	Pancreas	23.6093	6.80757e-16	0.988391	-0.734939	3.46976	1.89252	1.51527	4
ENSG00000221843.4	C2orf16	0.0138191	18	5	0.006128	Lung	0.966	Adipose_Visceral_Omentum	9.41722	5.64728e-18	0.589434	-2.53828	2.74085	0.422807	1.96095	5
ENSG00000230561.4	CCDC192	0.0138439	29	3	0.003136	Brain_Cerebellum	0.997212	Colon_Transverse	16.9212	2.11487e-16	3.44076	-2.95408	2.95408	-0.244254	1.8325	3
ENSG00000119285.10	HEATR1	0.0138601	30	2	0.01335	Colon_Transverse	0.7059	Esophagus_Muscularis	28.6849	2.81803e-15	1.01818	-2.47429	0.377368	-1.64492	0.421156	2
ENSG00000038210.12	PI4K2B	0.0139216	47	6	0.002867	Pituitary	0.943499	Esophagus_Mucosa	18.9527	1.07679e-15	0.920515	-1.68184	2.98165	1.13978	1.2175	6
ENSG00000160145.15	KALRN	0.013937	32	9	0.03126	Brain_Anterior_cingulate_cortex_BA24	0.8326	Esophagus_Gastroesophageal_Junction	11.9706	4.89263e-16	0.447127	-2.15375	1.06318	-0.7896	0.881833	9
ENSG00000178917.15	ZNF852	0.0139456	41	2	0.002934	Muscle_Skeletal	0.6286	Ovary	32.1794	8.69061e-16	7.55734	-2.97457	0.483698	-1.64321	0.771945	2
ENSG00000198624.12	CCDC69	0.0139834	40	10	0.000521628	Muscle_Skeletal	0.971064	Cells_Cultured_fibroblasts	14.3634	4.05671e-16	0.521886	-3.4694	1.84177	-0.203366	1.03208	10
ENSG00000163539.16	CLASP2	0.0140233	3	2	0.01487	Brain_Putamen_basal_ganglia	0.7286	Whole_Blood	2.3085	7.39557e-32	0.691496	-0.346988	2.43553	0.811843	1.44833	2
ENSG00000198752.10	CDC42BPB	0.0141805	42	6	0.00486641	Brain_Cerebellar_Hemisphere	0.974197	Muscle_Skeletal	19.7028	5.80109e-16	0.768346	-2.0967	2.81575	0.780401	1.35056	6
ENSG00000172380.5	GNG12	0.0141878	44	4	0.000430784	Pancreas	0.9843	Brain_Anterior_cingulate_cortex_BA24	18.4346	4.14946e-16	1.14835	-3.52047	3.04653	-0.907258	2.0881	4
ENSG00000172893.15	DHCR7	0.0142429	39	4	0.0386	Whole_Blood	0.685818	Skin_Not_Sun_Exposed_Suprapubic	28.3892	1.49939e-15	1.08878	-2.06843	2.06843	-0.0797551	1.61595	4
ENSG00000114107.8	CEP70	0.0142436	48	5	0.008784	Brain_Anterior_cingulate_cortex_BA24	0.842799	Ovary	20.4003	4.53434e-16	0.952767	-2.62035	2.62035	1.1162	1.20958	5
ENSG00000110700.6	RPS13	0.0142465	47	1	0.0134433	Thyroid	0.0151548	Testis	46.9933	3.31926e-15	46.9933	2.42866	2.4718	2.45081	0.00451846	1
ENSG00000149428.18	HYOU1	0.0142677	45	5	0.00160832	Breast_Mammary_Tissue	0.891046	Vagina	22.4052	8.64317e-16	0.882622	-3.15439	3.14237	-0.113187	1.84468	5
ENSG00000188385.11	JAKMIP3	0.0143449	47	4	0.00395139	Muscle_Skeletal	0.985716	Whole_Blood	35.2246	3.46773e-15	1.43162	-2.88202	1.21229	-1.23736	0.874724	4
ENSG00000014164.6	ZC3H3	0.0143618	49	3	0.00326257	Pituitary	0.9098	Brain_Putamen_basal_ganglia	41.774	1.12935e-15	2.41673	-0.169285	2.94185	2.00358	0.701842	3
ENSG00000177042.14	TMEM80	0.0144011	49	2	0.0030327	Pancreas	0.45352	Liver	44.222	4.36795e-15	2.52935	0.74956	2.9644	2.03123	0.513093	2
ENSG00000133275.15	CSNK1G2	0.0144136	37	5	0.0002327	Brain_Cortex	0.1874	Adipose_Subcutaneous	16.8775	4.65545e-16	0.857779	-1.50587	3.68058	1.89662	0.838964	5
ENSG00000112419.14	PHACTR2	0.0144993	40	6	0.00538258	Thyroid	0.986964	Minor_Salivary_Gland	21.4454	5.8188e-16	0.789881	-2.65525	2.7832	-0.0056775	1.62401	6
ENSG00000157617.16	C2CD2	0.0145067	42	10	0.0388822	Cells_Cultured_fibroblasts	0.980134	Spleen	18.0478	1.68443e-15	0.651104	-2.06543	1.36104	-0.452783	0.812445	10
ENSG00000184436.11	THAP7	0.0145088	44	3	0.00343	Lung	0.8416	Brain_Caudate_basal_ganglia	31.3463	9.65687e-16	4.61953	-0.505363	2.92632	1.75333	1.16809	3
ENSG00000104529.17	EEF1D	0.0145213	46	9	0.000119	Skin_Not_Sun_Exposed_Suprapubic	0.877411	Pancreas	15.9172	1.23905e-15	0.616131	-3.84818	1.66494	-0.276533	1.42543	9
ENSG00000197769.5	MAP1LC3C	0.0145444	15	8	0.003092	Adipose_Subcutaneous	0.7913	Esophagus_Mucosa	6.9158	1.23438e-17	0.268685	-2.3741	2.95844	1.10155	1.93113	8
ENSG00000167658.15	EEF2	0.014559	34	5	0.000542466	Thyroid	0.771	Prostate	18.3823	1.01957e-15	0.657535	-0.291067	3.45886	1.85131	1.11496	5
ENSG00000109917.10	ZPR1	0.014595	38	4	0.000342346	Brain_Hippocampus	0.534547	Artery_Tibial	23.9179	4.70267e-16	0.812182	-1.8391	3.58095	1.77944	1.44983	4
ENSG00000261261.2	RP11-297L17.4	0.0146128	1	1	0.0146128	Testis	0.0146128	Testis	1	1	1	2.44184	2.44184	2.44184	NA	1
ENSG00000109654.14	TRIM2	0.0146249	31	9	0.0233534	Brain_Putamen_basal_ganglia	0.9703	Prostate	14.5795	4.51579e-16	0.61458	-1.509	2.2676	-0.00854653	1.14243	9
ENSG00000163041.9	H3F3A	0.0146808	48	1	0.00691655	Uterus	0.99	Ovary	45.8807	4.5349e-15	45.8807	-2.70084	-0.0125335	-2.35894	0.425378	1
ENSG00000271259.1	RP11-1109F11.5	0.0146985	41	3	0.000388963	Whole_Blood	0.697	Prostate	33.8587	9.49405e-16	1.99968	-0.389373	3.54746	2.74792	0.780123	3
ENSG00000122786.19	CALD1	0.0147191	42	7	0.0152387	Brain_Cortex	0.971224	Uterus	15.2856	4.83829e-16	0.738143	-2.42665	2.27377	-1.10762	1.11205	7
ENSG00000187189.10	TSPYL4	0.0147387	48	5	0.000669465	Esophagus_Muscularis	0.995661	Adipose_Visceral_Omentum	24.7311	1.7688e-15	0.929197	-2.60095	3.40179	1.08041	1.37446	5
ENSG00000172209.5	GPR22	0.0147741	13	4	0.005197	Adrenal_Gland	0.2326	Heart_Atrial_Appendage	7.93118	1.36058e-17	0.302935	-2.79456	2.06051	-0.745345	2.31455	4
ENSG00000224577.1	LINC01117	0.0147849	17	4	0.2852	Adipose_Visceral_Omentum	0.9422	Cells_Cultured_fibroblasts	13.6438	9.11419e-18	0.540725	-0.605269	1.06871	0.541657	0.670874	4
ENSG00000109738.10	GLRB	0.0148141	37	6	0.0414348	Artery_Aorta	0.82793	Brain_Hypothalamus	16.7939	4.54941e-16	0.721936	-1.54066	2.03915	-0.086214	1.053	6
ENSG00000067066.16	SP100	0.0148705	29	7	0.001801	Esophagus_Gastroesophageal_Junction	0.8554	Cells_Cultured_fibroblasts	17.2396	5.09781e-16	0.719175	-3.12123	3.12123	-0.309319	2.50321	7
ENSG00000121454.5	LHX4	0.0149022	33	6	0.006138	Cells_EBV-transformed_lymphocytes	0.813	Kidney_Cortex	19.3252	1.87874e-15	0.971304	-1.71694	2.74032	1.27447	1.31604	6
ENSG00000261036.1	RP11-574H6.1	0.01492	1	1	0.01492	Testis	0.01492	Testis	1	1	1	-2.43432	-2.43432	-2.43432	NA	1
ENSG00000269967.1	RP11-84A19.4	0.0149338	38	4	0.01442	Brain_Hypothalamus	0.708069	Lung	22.7732	2.82637e-16	0.858715	-2.44663	2.10021	-0.827603	2.04472	4
ENSG00000267130.1	CTD-2540B15.9	0.014981	23	4	0.01164	Adipose_Visceral_Omentum	0.7084	Brain_Caudate_basal_ganglia	19.811	2.03666e-19	0.777923	-2.52287	0.950221	-2.20558	0.919796	4
ENSG00000225194.2	LINC00092	0.014989	38	9	0.0109253	Muscle_Skeletal	0.904891	Brain_Substantia_nigra	18.1638	5.27331e-16	0.888708	-2.53081	2.54508	1.53205	1.44486	9
ENSG00000157087.17	ATP2B2	0.0150235	43	5	0.00118486	Adipose_Visceral_Omentum	0.874225	Brain_Anterior_cingulate_cortex_BA24	30.4356	1.17907e-15	1.53826	-0.998576	3.2425	0.580985	1.10226	5
ENSG00000172071.11	EIF2AK3	0.0150581	19	4	0.01092	Brain_Amygdala	0.936416	Skin_Not_Sun_Exposed_Suprapubic	11.0324	1.46289e-18	0.513	-2.54525	1.23697	-1.2848	1.02475	4
ENSG00000274718.1	RP11-346C4.3	0.0150664	22	5	0.00288945	Brain_Hippocampus	0.9226	Ovary	13.6356	8.57636e-20	0.911452	-1.54313	2.97926	1.95431	1.30963	5
ENSG00000137628.16	DDX60	0.0150933	41	4	0.0034932	Vagina	0.826782	Brain_Cerebellar_Hemisphere	26.7189	8.49505e-16	1.75266	-1.59873	2.92063	1.27966	1.50676	4
ENSG00000223891.5	OSER1-AS1	0.0151577	49	3	0.005848	Kidney_Cortex	0.994763	Ovary	41.404	8.72555e-16	1.9584	-2.75618	2.03603	-0.335986	0.864871	3
ENSG00000120438.11	TCP1	0.015243	48	4	0.0074065	Prostate	0.951856	Colon_Transverse	20.0899	5.95448e-16	0.724803	-2.67799	1.86897	-0.446782	1.31238	4
ENSG00000254819.1	RP11-430L3.1	0.01533	1	1	0.01533	Testis	0.01533	Testis	1	1	1	2.42449	2.42449	2.42449	NA	1
ENSG00000168772.10	CXXC4	0.0153747	8	7	0.002376	Muscle_Skeletal	0.7358	Cells_EBV-transformed_lymphocytes	2.86473	2.03774e-17	0.147674	-2.54717	3.0387	1.01323	1.84324	7
ENSG00000268751.1	SCGB1B2P	0.0153916	26	9	0.041106	Brain_Cortex	0.7694	Uterus	9.23374	3.23467e-16	0.314749	-1.57351	2.04246	1.06196	0.906239	9
ENSG00000100450.12	GZMH	0.0154	1	1	0.0154	Whole_Blood	0.0154	Whole_Blood	1	1	1	-2.42283	-2.42283	-2.42283	NA	1
ENSG00000220256.3	AC093802.1	0.0154009	3	2	0.04882	Testis	0.1106	Brain_Anterior_cingulate_cortex_BA24	2.09893	3.03629e-16	0.901068	1.5955	1.97016	1.72039	0.216309	2
ENSG00000163902.11	RPN1	0.0154396	44	3	0.003069	Colon_Sigmoid	0.6166	Skin_Not_Sun_Exposed_Suprapubic	37.487	9.1437e-16	1.87573	-2.96074	0.747105	-1.73024	0.642921	3
ENSG00000008838.19	MED24	0.0154538	45	4	0.000437231	Colon_Transverse	0.945953	Brain_Cortex	28.7127	2.81657e-15	1.00278	-1.67641	3.51653	1.81552	1.3598	4
ENSG00000172197.10	MBOAT1	0.0154765	41	11	0.0005136	Testis	0.996638	Thyroid	13.0782	9.5609e-16	0.441439	-1.40521	3.47356	0.166262	0.879759	11
ENSG00000053501.12	USE1	0.0155308	43	6	0.000763205	Minor_Salivary_Gland	0.869145	Spleen	22.7733	4.19459e-16	1.12534	-3.36581	1.77004	0.316339	0.886569	6
ENSG00000198435.3	NRARP	0.0156986	6	3	0.002165	Brain_Hippocampus	0.5562	Brain_Caudate_basal_ganglia	4.04081	2.32224e-17	0.863397	-3.06661	0.588495	-2.18351	1.50875	3
ENSG00000258947.6	TUBB3	0.0157033	35	4	0.0520257	Cells_Cultured_fibroblasts	0.8285	Heart_Atrial_Appendage	19.484	1.09288e-15	1.23623	-1.94292	1.70717	0.0486831	1.39525	4
ENSG00000159377.10	PSMB4	0.0158178	39	1	0.01569	Adipose_Subcutaneous	0.01594	Brain_Anterior_cingulate_cortex_BA24	39	1.74163e-15	39	-2.41605	-2.41029	-2.41309	0.00291739	1
ENSG00000206527.9	HACD2	0.0158224	48	5	0.00506358	Brain_Spinal_cord_cervical_c-1	0.97102	Brain_Anterior_cingulate_cortex_BA24	25.4493	7.68246e-16	0.857118	-2.80296	2.60708	-0.636638	1.37835	5
ENSG00000186474.15	KLK12	0.0159051	17	4	0.0117	Pancreas	0.95586	Prostate	11.9794	1.24224e-17	0.750402	-2.12388	2.52107	-0.204334	1.23626	4
ENSG00000267250.1	RP11-118B18.2	0.015941	3	3	0.0039267	Adrenal_Gland	0.116938	Liver	1.59848	0.482837	0.482837	-2.88399	1.73931	0.141026	2.62115	3
ENSG00000250303.3	RP11-356J5.12	0.0160508	20	7	0.00326489	Nerve_Tibial	0.4706	Skin_Sun_Exposed_Lower_leg	11.3089	6.20818e-17	0.469942	-2.94163	2.25697	-0.690203	1.5938	7
ENSG00000179195.15	ZNF664	0.016069	40	5	0.000552845	Esophagus_Muscularis	0.5866	Adrenal_Gland	24.0733	1.72388e-15	0.814709	-1.6338	3.45375	0.968441	1.07325	5
ENSG00000276564.1	CTA-276F8.1	0.0160696	17	3	0.07308	Cells_Cultured_fibroblasts	0.99905	Brain_Nucleus_accumbens_basal_ganglia	11.9594	1.25782e-17	0.417072	-0.573066	1.79233	0.320014	0.736804	3
ENSG00000166974.12	MAPRE2	0.0161379	32	5	0.007938	Cells_Cultured_fibroblasts	0.861056	Breast_Mammary_Tissue	21.3218	5.42309e-16	0.830227	-2.01468	2.6547	0.203771	1.04292	5
ENSG00000171488.14	LRRC8C	0.0161477	37	4	0.00099039	Ovary	0.918232	Esophagus_Muscularis	26.9942	2.55391e-16	0.991768	-3.29324	3.29225	1.60616	2.15538	4
ENSG00000188107.14	EYS	0.01616	1	1	0.01616	Testis	0.01616	Testis	1	1	1	-2.40528	-2.40528	-2.40528	NA	1
ENSG00000101446.7	SPINT3	0.0162871	2	2	0.005052	Skin_Sun_Exposed_Lower_leg	0.0265	Skin_Not_Sun_Exposed_Suprapubic	1.89059	0.109407	0.109407	2.2188	2.8037	2.51125	0.413583	2
ENSG00000111540.15	RAB5B	0.0163412	35	4	0.0602483	Brain_Putamen_basal_ganglia	0.8786	Adipose_Subcutaneous	18.1362	7.14478e-16	0.961271	-1.69371	1.87897	0.675342	0.947084	4
ENSG00000175575.12	PAAF1	0.0163486	48	2	0.000289951	Heart_Left_Ventricle	0.8083	Skin_Sun_Exposed_Lower_leg	43.8036	1.24612e-15	1.62738	0.24262	3.62412	2.63714	0.452122	2
ENSG00000095794.19	CREM	0.0163526	45	2	0.001823	Esophagus_Gastroesophageal_Junction	0.8213	Adipose_Visceral_Omentum	32.337	7.23028e-16	12.5457	-2.84358	3.11765	0.89579	1.45015	2
ENSG00000066557.5	LRRC40	0.0163742	20	2	0.004082	Brain_Cerebellum	0.8463	Artery_Aorta	11.2711	2.36138e-17	8.64895	-2.87175	-0.193841	-1.49799	1.25918	2
ENSG00000272325.1	NUDT3	0.0163854	19	3	0.157903	Cells_Cultured_fibroblasts	0.621883	Artery_Tibial	11.4882	1.31653e-17	0.621333	-1.41216	0.941205	-0.322879	0.991702	3
ENSG00000117399.13	CDC20	0.0163898	48	4	0.005311	Brain_Amygdala	0.832199	Brain_Hippocampus	26.9014	1.08569e-15	0.992053	-2.78754	2.78754	0.60423	2.05876	4
ENSG00000100473.15	COCH	0.016429	37	3	0.004631	Brain_Nucleus_accumbens_basal_ganglia	0.584705	Brain_Cortex	27.6771	1.75444e-15	2.60411	-2.076	2.83164	0.858028	0.96937	3
ENSG00000172992.11	DCAKD	0.0164832	49	3	0.0186781	Adipose_Subcutaneous	0.973737	Brain_Amygdala	39.8381	3.91713e-15	1.4279	-1.52701	2.35189	1.42744	0.764188	3
ENSG00000157837.15	SPPL3	0.0165351	38	5	0.00177394	Nerve_Tibial	0.5143	Whole_Blood	28.6486	1.29506e-15	1.01894	-3.12568	1.69982	-1.95552	1.10308	5
ENSG00000138468.15	SENP7	0.016545	47	3	0.0048	Artery_Aorta	0.187	Lung	40.8782	9.77371e-16	1.72315	1.31951	2.82016	2.26167	0.446117	3
ENSG00000283000.1	RP11-297A16.4	0.0165776	10	1	0.0123765	Thyroid	0.01729	Lung	9.97515	5.14872e-17	9.97515	2.38048	2.50122	2.39303	0.0380451	1
ENSG00000224034.1	RP11-445P17.8	0.0167276	11	4	0.00158	Artery_Coronary	0.8287	Lung	6.8524	1.77242e-17	0.578856	-1.61896	3.15957	-0.302039	1.26408	4
ENSG00000221818.8	EBF2	0.0167335	18	10	0.00536278	Artery_Tibial	0.8439	Vagina	6.61648	3.62539e-18	0.273002	-2.78439	1.97016	0.413757	1.10922	10
ENSG00000188690.12	UROS	0.0167522	48	1	0.00604103	Brain_Cerebellum	0.135438	Lung	46.9791	4.64494e-15	46.9791	-2.74555	-1.493	-2.36386	0.255172	1
ENSG00000164764.10	SBSPON	0.0167817	29	10	0.01603	Skin_Not_Sun_Exposed_Suprapubic	0.963	Brain_Hypothalamus	11.0015	9.83079e-16	0.443243	-2.40823	1.81269	-1.25616	1.03999	10
ENSG00000133111.3	RFXAP	0.016839	12	5	0.03091	Testis	0.7528	Breast_Mammary_Tissue	5.2126	2.46163e-32	0.366758	-1.55772	2.15823	0.301407	1.3655	5
ENSG00000267334.1	CTD-2534I21.8	0.016871	5	2	0.007329	Testis	0.4689	Brain_Frontal_Cortex_BA9	4.01229	7.47373e-20	0.987711	-2.68151	-0.72427	-1.11572	0.875306	2
ENSG00000110315.6	RNF141	0.0169391	49	8	0.003063	Ovary	0.965806	Brain_Frontal_Cortex_BA9	26.2769	2.56445e-15	0.923448	-1.88671	2.96134	-0.176401	0.991937	8
ENSG00000101448.13	EPPIN	0.0170491	5	3	0.003872	Adipose_Visceral_Omentum	0.5746	Testis	2.12837	1.22041e-16	0.766028	-2.73169	2.88841	-0.510982	2.06921	3
ENSG00000116095.10	PLEKHA3	0.01705	39	2	0.00317895	Esophagus_Gastroesophageal_Junction	0.689605	Skin_Sun_Exposed_Lower_leg	34.1626	7.29826e-16	3.55684	-0.809391	2.94988	2.43633	1.0046	2
ENSG00000128159.11	TUBGCP6	0.0170815	39	6	0.0446932	Pancreas	0.8953	Brain_Cortex	21.3378	2.00959e-15	0.912609	-1.80484	2.00753	-0.492783	0.887169	6
ENSG00000250241.5	RP11-9G1.3	0.0171439	16	5	0.001326	Brain_Hypothalamus	0.993523	Brain_Nucleus_accumbens_basal_ganglia	9.16377	3.23568e-18	0.510357	-3.21029	1.40777	0.116364	1.34187	5
ENSG00000136160.14	EDNRB	0.0171535	22	3	0.0075558	Testis	0.804376	Minor_Salivary_Gland	12.9507	2.82615e-17	3.17106	-2.6713	1.96211	-0.787995	1.8657	3
ENSG00000248752.1	RP11-114J13.1	0.0171911	1	1	0.0171911	Testis	0.0171911	Testis	1	1	1	2.38259	2.38259	2.38259	NA	1
ENSG00000258028.1	RP11-148E17.1	0.01728	1	1	0.01728	Testis	0.01728	Testis	1	1	1	2.3807	2.3807	2.3807	NA	1
ENSG00000160888.6	IER2	0.0173046	26	4	0.01424	Lung	0.8148	Brain_Cerebellum	18.981	1.72226e-15	0.995947	-2.21983	2.45115	1.87306	1.14672	4
ENSG00000235268.2	KDM4E	0.0173099	12	4	0.08125	Brain_Spinal_cord_cervical_c-1	0.8061	Adipose_Subcutaneous	7.12272	4.9442e-17	0.376976	-1.74348	0.752917	-0.695433	1.04695	4
ENSG00000275173.1	AC091199.1	0.01731	1	1	0.01731	Testis	0.01731	Testis	1	1	1	2.38006	2.38006	2.38006	NA	1
ENSG00000117154.11	IGSF21	0.0173108	38	8	0.02258	Heart_Left_Ventricle	0.887178	Muscle_Skeletal	21.3347	4.21828e-16	0.934698	-2.10103	2.28047	0.116659	1.24835	8
ENSG00000169676.5	DRD5	0.0173306	18	3	0.01206	Brain_Substantia_nigra	0.2424	Nerve_Tibial	16.0528	2.69382e-17	0.840431	-2.51038	2.39656	-1.79477	1.55235	3
ENSG00000187630.15	DHRS4L2	0.0173434	41	7	0.007346	Colon_Sigmoid	0.944384	Adipose_Subcutaneous	18.256	1.62591e-15	0.68289	-2.62649	2.68074	0.030595	1.48487	7
ENSG00000119632.3	IFI27L2	0.0173996	49	2	0.05223	Brain_Anterior_cingulate_cortex_BA24	0.9977	Adrenal_Gland	45.8364	7.22874e-16	1.82275	-1.94123	0.77025	-0.297805	0.545174	2
ENSG00000162763.3	LRRC52	0.0174745	11	2	0.001715	Thyroid	0.7389	Esophagus_Muscularis	9.70936	5.52343e-17	1.24678	-3.13561	1.4201	0.820634	1.34571	2
ENSG00000196628.15	TCF4	0.0174777	16	1	0.01549	Brain_Hypothalamus	0.02096	Brain_Hippocampus	16	1.0718e-32	16	-2.42072	2.42072	1.48273	1.9186	1
ENSG00000120694.19	HSPH1	0.0174992	40	4	0.000355226	Adrenal_Gland	0.986782	Thyroid	24.1254	6.75051e-16	2.11913	-0.0439239	3.57129	1.84304	1.14604	4
ENSG00000112319.17	EYA4	0.0175053	34	6	0.00093543	Cells_Cultured_fibroblasts	0.808618	Heart_Left_Ventricle	16.1582	5.19385e-16	0.595479	-3.30926	2.42861	0.279844	1.60846	6
ENSG00000013288.8	MAN2B2	0.0176055	46	2	0.000799341	Brain_Hypothalamus	0.9276	Brain_Amygdala	41.17	9.87647e-16	1.74499	-3.35302	-0.0908648	-2.59283	0.507636	2
ENSG00000162188.5	GNG3	0.0176181	3	3	0.01087	Brain_Hypothalamus	0.893	Colon_Transverse	1.10502	0.855905	0.855905	-0.134509	2.54685	1.48445	1.42469	3
ENSG00000271148.1	RP11-401N18.1	0.0176237	3	2	0.005698	Brain_Cerebellum	0.3604	Brain_Anterior_cingulate_cortex_BA24	2.01726	2.17562e-17	0.982743	-0.914603	2.76467	0.921557	1.83965	2
ENSG00000105245.9	NUMBL	0.0177254	47	6	0.001461	Brain_Spinal_cord_cervical_c-1	0.997389	Adipose_Subcutaneous	20.3232	1.98006e-15	1.49048	-3.18232	0.521806	-0.528926	0.946569	6
ENSG00000100652.4	SLC10A1	0.0177306	32	2	0.00983045	Testis	0.605828	Nerve_Tibial	29.2764	1.81133e-15	1.24189	-2.58174	0.912904	0.616634	0.727112	2
ENSG00000258433.1	RP11-255M2.1	0.01776	1	1	0.01776	Testis	0.01776	Testis	1	1	1	2.37058	2.37058	2.37058	NA	1
ENSG00000091640.7	SPAG7	0.0178446	49	1	0.0100787	Breast_Mammary_Tissue	0.0573723	Skin_Not_Sun_Exposed_Suprapubic	47.6497	2.34585e-15	47.6497	1.90046	2.57312	2.33514	0.166299	1
ENSG00000040633.12	PHF23	0.0178923	12	4	0.02607	Brain_Substantia_nigra	0.8462	Artery_Aorta	7.20071	1.74985e-34	0.466408	-2.22517	2.22517	-0.21072	1.87975	4
ENSG00000170113.15	NIPA1	0.0179594	12	3	0.2412	Stomach	0.53468	Brain_Caudate_basal_ganglia	7.5535	1.92744e-17	0.523349	-1.17199	1.12805	-0.728251	0.606261	3
ENSG00000129038.15	LOXL1	0.0179808	38	5	0.00302637	Heart_Atrial_Appendage	0.921139	Skin_Sun_Exposed_Lower_leg	18.1233	4.58341e-16	1.12389	-2.77791	2.96505	0.530801	1.52444	5
ENSG00000151503.12	NCAPD3	0.0179982	44	4	0.00111704	Artery_Tibial	0.885	Brain_Caudate_basal_ganglia	22.7959	1.03395e-15	3.52689	-3.25926	1.16951	-1.59599	1.44789	4
ENSG00000232903.2	LINC01166	0.0179995	42	6	0.04526	Minor_Salivary_Gland	0.9946	Pituitary	17.1726	6.47429e-16	0.744138	-2.00223	1.28181	-0.444168	0.962562	6
ENSG00000136213.9	CHST12	0.0181706	34	9	0.01649	Lung	0.9618	Liver	14.8828	1.43093e-15	0.585672	-1.44576	2.39789	1.25983	0.767805	9
ENSG00000276923.1	RP11-321P16.1	0.0182273	7	5	0.04099	Adrenal_Gland	0.873653	Esophagus_Muscularis	3.7529	3.55827e-16	0.181379	-0.781979	2.04363	0.562947	1.09864	5
ENSG00000009790.14	TRAF3IP3	0.0182752	47	3	0.001526	Adrenal_Gland	0.9942	Brain_Cerebellum	31.4142	6.08947e-16	2.88851	-1.509	3.16969	1.08505	1.28082	3
ENSG00000066422.4	ZBTB11	0.0182823	33	5	0.00015412	Brain_Hypothalamus	0.7682	Uterus	20.8983	5.89855e-16	0.941056	-2.94143	3.78434	1.44212	2.26338	5
ENSG00000025796.13	SEC63	0.0182922	13	4	0.3377	Adrenal_Gland	0.8579	Esophagus_Muscularis	8.80823	1.00304e-17	0.35344	-0.95872	0.95872	-0.0958457	0.807777	4
ENSG00000145020.15	AMT	0.0182958	49	1	0.00918657	Adipose_Subcutaneous	0.0729134	Brain_Putamen_basal_ganglia	47.4765	1.23857e-15	47.4765	-2.60503	-1.79337	-2.32205	0.213834	1
ENSG00000227463.2	RP11-158D2.2	0.01834	1	1	0.01834	Testis	0.01834	Testis	1	1	1	-2.35868	-2.35868	-2.35868	NA	1
ENSG00000164037.16	SLC9B1	0.0183513	42	4	0.000205149	Pituitary	0.889	Adipose_Subcutaneous	30.5103	2.9982e-15	1.0484	-3.71259	0.13957	-0.593241	1.34953	4
ENSG00000173020.10	GRK2	0.0183706	48	2	0.00429454	Brain_Putamen_basal_ganglia	0.874372	Brain_Spinal_cord_cervical_c-1	42.1281	1.27009e-15	3.99648	-2.85568	2.46416	0.213826	1.05901	2
ENSG00000244219.6	GS1-259H13.2	0.0183813	49	2	0.011044	Testis	0.792601	Skin_Sun_Exposed_Lower_leg	45.7743	7.0866e-16	1.57329	0.262935	2.5413	0.759083	0.463627	2
ENSG00000183807.7	FAM162B	0.0183886	39	6	0.05185	Brain_Nucleus_accumbens_basal_ganglia	0.997379	Colon_Transverse	19.765	1.64299e-15	0.802253	-1.94438	1.92436	0.331415	0.996702	6
ENSG00000124490.13	CRISP2	0.0184677	16	3	0.007844	Prostate	0.450312	Whole_Blood	11.4332	1.10449e-17	0.965443	-2.65871	2.65871	1.36703	1.73511	3
ENSG00000145247.11	OCIAD2	0.0185613	19	4	0.1583	Stomach	0.996291	Testis	13.404	1.55396e-18	0.582311	-0.94688	1.41081	0.147825	0.760953	4
ENSG00000247315.3	ZCCHC3	0.0185948	28	4	0.01252	Brain_Spinal_cord_cervical_c-1	0.2405	Brain_Hypothalamus	20.9963	5.34414e-16	0.942989	-1.76699	2.49714	-1.05335	1.01132	4
ENSG00000267011.5	CTB-50L17.16	0.0186464	17	5	0.013877	Brain_Substantia_nigra	0.4854	Thyroid	7.8002	7.03062e-18	0.607788	-2.34161	2.46043	0.377211	1.79195	5
ENSG00000225383.7	SFTA1P	0.0186485	35	4	0.000622065	Artery_Tibial	0.8741	Colon_Transverse	20.7867	4.47534e-16	1.2849	-0.93381	3.42181	1.46307	1.38094	4
ENSG00000278737.1	RP11-325L12.7	0.0187034	15	3	0.02255	Thyroid	0.8771	Brain_Frontal_Cortex_BA9	8.56983	1.46069e-18	0.368436	-1.51806	2.28097	1.15032	1.08872	3
ENSG00000008294.20	SPAG9	0.0187686	46	3	0.00270862	Ovary	0.461023	Muscle_Skeletal	32.7203	9.50811e-16	2.16251	-2.99901	2.9939	-1.41235	2.02867	3
ENSG00000152954.11	NRSN1	0.0188029	25	9	0.0158534	Brain_Cortex	0.926355	Brain_Putamen_basal_ganglia	10.8004	6.79818e-18	0.381805	-2.41227	1.98486	-0.557735	1.04847	9
ENSG00000160336.14	ZNF761	0.0188442	48	5	0.0008191	Brain_Nucleus_accumbens_basal_ganglia	0.9257	Testis	31.76	3.12092e-15	1.47676	-3.34626	-0.0932561	-1.47265	0.814659	5
ENSG00000258551.5	CRAT37	0.0188818	3	2	0.1196	Testis	0.305	Adrenal_Gland	2.33067	0.0414087	0.627921	-1.55645	1.46142	0.310245	1.63122	2
ENSG00000228634.1	RP4-534N18.2	0.01889	2	1	0.01889	Cells_Cultured_fibroblasts	0.01889	Cells_Cultured_fibroblasts	2	3.14018e-16	2	-2.34769	-2.34769	-2.34769	0	1
ENSG00000060558.3	GNA15	0.0189098	41	8	0.004101	Brain_Nucleus_accumbens_basal_ganglia	0.919631	Esophagus_Muscularis	12.2069	7.1487e-16	0.823201	-2.87029	2.76166	-0.311026	1.46069	8
ENSG00000144481.16	TRPM8	0.0189145	3	3	0.02016	Testis	0.5405	Brain_Caudate_basal_ganglia	1.20704	0.868232	0.868232	-1.70868	2.32336	0.000872731	2.08473	3
ENSG00000106080.10	FKBP14	0.0189599	35	3	0.001987	Adrenal_Gland	0.8867	Brain_Caudate_basal_ganglia	16.9824	5.53599e-16	2.54596	-3.09217	3.09217	-0.600774	2.13355	3
ENSG00000188051.6	TMEM221	0.0189899	47	3	0.001025	Brain_Spinal_cord_cervical_c-1	0.995726	Esophagus_Mucosa	28.3478	5.90523e-16	3.02618	-0.712105	3.28357	0.180489	1.00743	3
ENSG00000089199.9	CHGB	0.0190463	26	4	0.002832	Brain_Hippocampus	0.2637	Brain_Cortex	19.5267	6.03457e-16	0.720902	-2.98541	2.75257	-1.95313	1.59294	4
ENSG00000163736.3	PPBP	0.0190607	3	3	0.06813	Stomach	0.9876	Esophagus_Muscularis	2.22489	0.168445	0.168445	-1.82415	-0.0155417	-0.627438	1.03647	3
ENSG00000129116.17	PALLD	0.0190891	19	11	0.008271	Brain_Anterior_cingulate_cortex_BA24	0.9767	Esophagus_Mucosa	7.78832	1.04203e-17	0.290676	-2.6408	1.76291	-0.0533856	1.05891	11
ENSG00000165312.6	OTUD1	0.0191553	46	3	0.0071252	Adipose_Visceral_Omentum	0.8389	Brain_Hippocampus	36.5278	8.76984e-16	3.7037	-2.69094	2.01902	-1.89994	0.999338	3
ENSG00000163909.7	HEYL	0.0191605	40	3	0.07393	Colon_Transverse	0.883238	Esophagus_Mucosa	27.9931	2.68187e-15	0.972437	-1.78705	1.58661	-0.62079	1.19895	3
ENSG00000180448.10	ARHGAP45	0.0191808	34	5	0.000100007	Brain_Cortex	0.967745	Whole_Blood	19.9969	3.84514e-16	1.02326	-3.89058	0.690945	-1.91879	1.22425	5
ENSG00000180422.3	LINC00304	0.0192368	39	6	0.0188752	Whole_Blood	0.980001	Ovary	19.7941	7.03395e-16	0.768889	-2.27799	2.34799	0.201007	1.41768	6
ENSG00000235194.8	PPP1R3E	0.019251	42	1	0.01884	Artery_Tibial	0.165303	Brain_Cerebellar_Hemisphere	40.7888	1.02248e-15	40.7888	-2.34868	-1.38745	-2.3008	0.184269	1
ENSG00000131094.3	C1QL1	0.0192657	7	7	0.00718	Esophagus_Mucosa	0.465194	Brain_Cerebellum	1.90027	0.290892	0.290892	-1.81101	2.68838	0.25148	1.68831	7
ENSG00000101276.14	SLC52A3	0.0193151	33	8	0.00784601	Esophagus_Muscularis	0.99337	Skin_Sun_Exposed_Lower_leg	15.4659	1.24915e-15	0.572822	-2.65863	1.13957	-0.416462	1.29723	8
ENSG00000157388.15	CACNA1D	0.0193402	28	3	0.00562239	Lung	0.727068	Heart_Atrial_Appendage	20.6901	5.12717e-16	0.941275	-2.76903	0.349029	-1.83348	0.550707	3
ENSG00000213888.3	LINC01521	0.0193416	48	2	0.00406838	Artery_Aorta	0.717233	Esophagus_Muscularis	42.2171	9.15471e-16	5.3656	-2.87281	1.20087	-2.01769	0.8326	2
ENSG00000121775.17	TMEM39B	0.01935	48	2	0.00505	Adrenal_Gland	0.0267819	Brain_Hypothalamus	46.0569	1.69953e-15	1.90609	-2.80383	-2.21468	-2.74774	0.148	2
ENSG00000259861.1	CTC-471C19.2	0.01944	1	1	0.01944	Testis	0.01944	Testis	1	1	1	-2.33698	-2.33698	-2.33698	NA	1
ENSG00000163825.3	RTP3	0.0195179	5	4	0.006967	Pituitary	0.8144	Thyroid	3.11004	2.13254e-17	0.318734	-2.69842	0.984845	-0.954579	1.51458	4
ENSG00000111711.9	GOLT1B	0.0196071	43	4	0.0010096	Pancreas	0.731514	Cells_Cultured_fibroblasts	33.6801	4.20021e-16	1.42488	-3.28784	1.66521	-2.42805	1.0893	4
ENSG00000188770.9	OPTC	0.0198403	25	5	0.0203246	Brain_Cerebellar_Hemisphere	0.945521	Breast_Mammary_Tissue	13.3193	1.14537e-17	0.924236	-2.3203	1.71052	-0.84392	1.11933	5
ENSG00000140577.15	CRTC3	0.0198496	45	5	0.0005652	Vagina	0.9344	Brain_Spinal_cord_cervical_c-1	28.5089	2.6494e-15	1.32678	-3.44779	2.40965	-2.28442	1.35557	5
ENSG00000127481.14	UBR4	0.0199066	41	4	0.0316735	Pancreas	0.391275	Heart_Atrial_Appendage	34.3154	1.95225e-15	1.28153	-2.14851	1.61875	-1.62898	0.623288	4
ENSG00000184787.18	UBE2G2	0.0199496	46	4	0.004061	Minor_Salivary_Gland	0.998415	Adipose_Subcutaneous	32.0229	1.03e-15	1.9427	-2.87338	1.96816	0.681372	1.08936	4
ENSG00000156304.14	SCAF4	0.019978	47	1	0.00744847	Colon_Sigmoid	0.4923	Colon_Transverse	45.0107	1.73205e-15	45.0107	0.686655	2.6761	2.26264	0.526673	1
ENSG00000142484.6	TM4SF5	0.0199782	4	2	0.005673	Colon_Sigmoid	0.7311	Liver	3.00108	6.60715e-34	0.998916	-0.343663	2.76611	1.98866	1.55488	2
ENSG00000181722.16	ZBTB20	0.0199964	23	4	0.002815	Breast_Mammary_Tissue	0.7527	Cells_Cultured_fibroblasts	14.3434	1.02884e-18	0.91705	-2.98725	0.378984	-0.479961	1.29117	4
ENSG00000260953.1	RP11-426C22.6	0.020047	27	4	0.002994	Brain_Cortex	0.925655	Pancreas	15.5538	5.97498e-16	0.90416	-2.96835	0.546157	-1.30739	1.24731	4
ENSG00000189129.13	PLAC9	0.0200552	46	7	0.000543019	Esophagus_Gastroesophageal_Junction	0.634	Vagina	22.8202	2.14768e-15	0.814954	-3.45859	2.66043	-2.14101	1.2729	7
ENSG00000151366.12	NDUFC2	0.0201682	33	3	0.00127128	Adipose_Subcutaneous	0.569547	Colon_Transverse	22.5581	4.95358e-16	1.92188	-0.595065	3.22239	1.41888	0.854492	3
ENSG00000133661.15	SFTPD	0.0201802	47	4	0.00159307	Stomach	0.9671	Cells_Cultured_fibroblasts	30.2623	2.87547e-15	1.90682	-2.92586	3.15717	1.22809	1.26554	4
ENSG00000100347.14	SAMM50	0.0201808	49	1	0.0152093	Esophagus_Mucosa	0.103942	Brain_Spinal_cord_cervical_c-1	47.9783	4.74748e-15	47.9783	1.62604	2.42736	2.29704	0.153319	1
ENSG00000163235.15	TGFA	0.020188	31	8	0.0040783	Spleen	0.790335	Nerve_Tibial	14.5402	4.73619e-16	0.517298	-2.87204	2.69179	-0.631025	1.69711	8
ENSG00000169085.11	C8orf46	0.0202542	45	4	0.02093	Artery_Coronary	0.96775	Brain_Substantia_nigra	22.8784	9.16727e-16	2.00463	-2.30924	1.81881	-0.264647	1.50242	4
ENSG00000261146.1	RP11-2A4.4	0.0203	1	1	0.0203	Testis	0.0203	Testis	1	1	1	-2.32076	-2.32076	-2.32076	NA	1
ENSG00000138380.17	CARF	0.0203051	46	3	0.03895	Brain_Hypothalamus	0.9188	Vagina	37.5087	3.66802e-15	3.64863	-2.06471	1.69825	-0.893482	1.04897	3
ENSG00000258100.1	RP11-121E16.1	0.0203146	10	4	0.0399	Colon_Transverse	0.7298	Esophagus_Gastroesophageal_Junction	6.25622	1.93455e-16	0.469442	-2.05478	1.30205	0.181259	1.14907	4
ENSG00000076356.6	PLXNA2	0.0203524	38	6	0.00631228	Artery_Aorta	0.678521	Skin_Sun_Exposed_Lower_leg	16.1077	5.12672e-16	0.908754	-2.7311	2.17367	-0.0648302	2.01144	6
ENSG00000166200.14	COPS2	0.0203782	49	2	0.0164467	Brain_Cerebellar_Hemisphere	0.33048	Thyroid	45.5361	7.48216e-16	1.81084	-2.39885	1.85392	-1.31975	0.533789	2
ENSG00000160298.17	C21orf58	0.0204699	46	5	0.000706	Colon_Sigmoid	0.5694	Brain_Hippocampus	26.5311	1.13499e-15	1.11023	-1.04016	3.38724	1.43733	1.31628	5
ENSG00000231648.1	LINC01698	0.0204972	2	1	0.02071	Skin_Not_Sun_Exposed_Suprapubic	0.02358	Skin_Sun_Exposed_Lower_leg	1.95101	0.0489863	1.95101	-2.31323	-2.2639	-2.28857	0.0348785	1
ENSG00000112280.15	COL9A1	0.0205058	18	11	0.0553867	Colon_Sigmoid	0.693266	Nerve_Tibial	5.27304	2.20827e-18	0.193734	-1.91583	1.73639	0.6912	0.986893	11
ENSG00000180667.10	YOD1	0.0205196	29	3	0.005998	Muscle_Skeletal	0.2739	Heart_Atrial_Appendage	26.4163	1.84994e-15	0.981002	-2.74789	2.74789	-1.11116	2.34804	3
ENSG00000197056.9	ZMYM1	0.0205424	39	2	0.00557801	Uterus	0.5132	Whole_Blood	28.4	7.91563e-16	9.53175	0.653863	2.77161	2.34119	0.332701	2
ENSG00000234719.8	NPIPB2	0.0205518	49	1	0.00725452	Esophagus_Mucosa	0.6215	Cells_EBV-transformed_lymphocytes	47.9171	4.73766e-15	47.9171	-0.493726	2.68493	2.25858	0.407954	1
ENSG00000161405.16	IKZF3	0.0205732	23	3	0.003963	Lung	0.4282	Pancreas	17.2168	6.37968e-18	1.1231	0.792276	2.88109	2.47063	0.443926	3
ENSG00000134461.15	ANKRD16	0.0205903	31	6	0.0004996	Brain_Cerebellum	0.8449	Brain_Caudate_basal_ganglia	18.4652	7.41099e-16	0.954972	-3.48097	2.58193	-1.28357	1.72508	6
ENSG00000232098.3	CTD-2619J13.14	0.0206237	43	5	0.0006935	Esophagus_Mucosa	0.7463	Thyroid	20.554	1.05832e-15	0.863393	-2.7566	3.39214	0.269858	1.99443	5
ENSG00000114204.14	SERPINI2	0.0206279	31	3	0.02093	Heart_Atrial_Appendage	0.968943	Brain_Nucleus_accumbens_basal_ganglia	26.9761	1.49368e-15	1.03707	-2.30924	0.543915	0.146357	0.711499	3
ENSG00000166140.17	ZFYVE19	0.0206323	47	3	0.00106	Brain_Frontal_Cortex_BA9	0.9595	Brain_Substantia_nigra	32.7557	3.20642e-15	4.59244	-0.675592	3.2741	1.68843	1.12427	3
ENSG00000189306.10	RRP7A	0.0206559	45	6	0.00144472	Adrenal_Gland	0.997563	Testis	25.588	2.50432e-15	0.894126	-2.28165	3.18556	-0.222313	1.34001	6
ENSG00000175048.16	ZDHHC14	0.0207363	23	12	0.001744	Cells_Cultured_fibroblasts	0.9543	Muscle_Skeletal	6.79726	1.59269e-17	0.238848	-1.10774	3.13068	0.542694	1.10208	12
ENSG00000006451.7	RALA	0.0207533	22	4	0.002469	Adipose_Subcutaneous	0.6024	Skin_Not_Sun_Exposed_Suprapubic	11.6638	1.08755e-17	0.734795	-3.02712	2.18539	-0.950148	2.04375	4
ENSG00000241163.7	LINC00877	0.0208023	13	8	0.006962	Ovary	0.9648	Artery_Aorta	5.86439	4.79161e-18	0.209403	-2.69866	0.728512	-0.866304	0.955394	8
ENSG00000154342.5	WNT3A	0.0208085	8	2	0.0115569	Skin_Sun_Exposed_Lower_leg	0.03981	Testis	7.17002	7.24142e-20	0.829983	-2.05571	2.52539	1.6005	1.48645	2
ENSG00000178965.13	ERICH3	0.0208192	10	8	0.0151886	Brain_Hippocampus	0.9915	Liver	3.09016	6.5095e-17	0.210599	-0.304168	2.42785	0.797598	0.90313	8
ENSG00000271303.1	SRXN1	0.0208295	48	5	0.00553293	Brain_Substantia_nigra	0.9637	Brain_Nucleus_accumbens_basal_ganglia	31.0417	5.51746e-16	1.60299	-2.10802	2.77425	-0.419876	1.1176	5
ENSG00000230978.1	LINC00160	0.0208741	4	2	0.005516	Esophagus_Mucosa	0.02553	Adipose_Subcutaneous	3.76812	1.31519e-17	0.231882	-2.77525	-2.23329	-2.36878	0.270979	2
ENSG00000250799.9	PRODH2	0.0208779	7	3	0.031	Pancreas	0.431	Brain_Cerebellum	4.94531	1.28424e-17	0.526731	-2.15707	1.43601	0.126056	1.58492	3
ENSG00000130303.12	BST2	0.0208911	30	6	0.00785072	Prostate	0.918154	Thyroid	13.0826	2.38919e-16	0.774165	-2.14591	2.65842	0.659665	1.1116	6
ENSG00000134013.15	LOXL2	0.0208912	42	6	0.008517	Vagina	0.777649	Brain_Cerebellar_Hemisphere	26.3159	7.48032e-16	1.04093	-2.63086	2.18362	-1.13537	1.40379	6
ENSG00000250038.5	RP11-180C1.1	0.0209326	2	2	0.02759	Testis	0.6051	Cells_Cultured_fibroblasts	1.45225	0.547746	0.547746	-2.20307	0.51708	-0.842993	1.92343	2
ENSG00000159873.9	CCDC117	0.02094	39	3	0.00183699	Adipose_Subcutaneous	0.98317	Testis	21.4826	1.26521e-15	5.27776	-3.11539	1.54934	-1.32062	1.48813	3
ENSG00000196620.9	UGT2B15	0.0210385	8	2	0.008935	Prostate	0.2479	Small_Intestine_Terminal_Ileum	7.50312	5.38464e-17	0.496883	-2.61453	-1.15547	-2.34608	0.505608	2
ENSG00000100105.17	PATZ1	0.02106	47	4	0.0108978	Brain_Amygdala	0.978255	Artery_Tibial	28.3074	1.00241e-15	2.74903	-2.54596	2.47403	-0.239551	1.19504	4
ENSG00000258909.1	RP11-164C12.2	0.0211	1	1	0.0211	Testis	0.0211	Testis	1	1	1	2.30619	2.30619	2.30619	NA	1
ENSG00000133678.13	TMEM254	0.0211104	45	4	0.008538	Cells_EBV-transformed_lymphocytes	0.988595	Muscle_Skeletal	33.7326	7.11866e-16	1.80879	-2.10233	2.63002	0.193222	0.858633	4
ENSG00000132010.15	ZNF20	0.0212634	15	2	0.003895	Breast_Mammary_Tissue	0.09686	Testis	14.4643	4.86688e-20	0.517899	-2.88654	1.66027	-2.46245	1.14108	2
ENSG00000148942.14	SLC5A12	0.0212657	7	4	0.0153959	Heart_Atrial_Appendage	0.7866	Brain_Caudate_basal_ganglia	3.32744	1.33696e-16	0.857886	-1.29796	2.42293	-0.286222	1.28605	4
ENSG00000249915.7	PDCD6	0.0212671	41	3	0.000246137	Brain_Nucleus_accumbens_basal_ganglia	0.4686	Small_Intestine_Terminal_Ileum	29.5006	4.71832e-16	3.55522	-1.76854	3.66625	2.51589	0.93717	3
ENSG00000075420.12	FNDC3B	0.021307	19	6	0.0716487	Lung	0.8958	Artery_Coronary	8.01797	1.246e-17	0.317046	-0.252053	1.80134	0.788028	0.698723	6
ENSG00000164741.14	DLC1	0.0213195	25	7	0.0771513	Testis	0.9938	Muscle_Skeletal	15.5575	1.79117e-17	0.539971	-1.76746	1.03301	0.13913	0.976757	7
ENSG00000140830.8	TXNL4B	0.0213297	43	7	0.003031	Heart_Left_Ventricle	0.9946	Stomach	26.033	6.66496e-16	0.880359	-2.23955	2.96458	-0.0419005	1.42807	7
ENSG00000155714.13	PDZD9	0.0213675	40	2	0.005789	Adrenal_Gland	0.872827	Uterus	21.0822	7.31287e-16	18.3684	-2.7595	2.7595	-0.0113824	2.04112	2
ENSG00000259518.1	LINC01583	0.0213717	2	2	0.0410042	Cells_Cultured_fibroblasts	0.1327	Testis	1.16863	0.831374	0.831374	-2.04349	-1.50354	-1.77351	0.381801	2
ENSG00000105676.13	ARMC6	0.021376	32	3	0.006685	Cells_Cultured_fibroblasts	0.9978	Skin_Sun_Exposed_Lower_leg	22.9679	2.86168e-16	1.45796	-0.762268	2.71214	0.755388	1.21505	3
ENSG00000228474.5	OST4	0.0214018	25	4	0.02941	Adrenal_Gland	0.821863	Brain_Frontal_Cortex_BA9	12.5787	6.99611e-18	0.754176	-2.17795	2.17795	0.792894	0.994205	4
ENSG00000164627.17	KIF6	0.0214279	41	2	0.04561	Testis	0.982729	Pituitary	36.9281	1.74598e-15	2.18965	-1.99898	0.384856	-0.885696	0.583967	2
ENSG00000224532.2	RP3-470L22.1	0.02154	1	1	0.02154	Testis	0.02154	Testis	1	1	1	-2.29838	-2.29838	-2.29838	NA	1
ENSG00000129968.15	ABHD17A	0.0215628	31	4	0.01257	Ovary	0.7782	Adipose_Subcutaneous	21.9009	8.21501e-16	0.996689	-1.77028	2.49572	-0.192269	1.15265	4
ENSG00000103196.11	CRISPLD2	0.0215986	34	10	0.00232635	Brain_Nucleus_accumbens_basal_ganglia	0.9842	Colon_Sigmoid	17.7888	1.72664e-15	0.645537	-3.04506	1.46739	-1.45788	1.1042	10
ENSG00000115457.9	IGFBP2	0.02161	48	6	0.0206054	Esophagus_Muscularis	0.9976	Kidney_Cortex	24.425	1.25515e-15	0.835132	-2.31514	1.88317	-0.86453	0.937892	6
ENSG00000121281.12	ADCY7	0.0216196	22	11	0.0004754	Brain_Caudate_basal_ganglia	0.9534	Esophagus_Mucosa	7.31098	2.49728e-17	0.310421	-1.93208	3.49425	-0.725132	1.35928	11
ENSG00000229621.1	LINC01822	0.0216599	2	2	0.005715	Testis	0.7756	Heart_Atrial_Appendage	1.04425	0.955755	0.955755	0.285058	2.7637	1.52438	1.75267	2
ENSG00000206567.9	AC022007.5	0.0216697	16	5	0.006019	Muscle_Skeletal	0.7634	Brain_Hippocampus	11.3366	8.24169e-18	0.460307	-1.46033	2.74674	-0.306074	1.36765	5
ENSG00000049541.10	RFC2	0.0216806	43	3	0.00918506	Skin_Not_Sun_Exposed_Suprapubic	0.735056	Whole_Blood	24.9988	5.6137e-16	3.04252	-1.74434	2.60509	0.450724	1.95515	3
ENSG00000180096.11	2001-09-01	0.0217229	45	2	0.1955	Brain_Caudate_basal_ganglia	0.9533	Ovary	42.0539	4.15079e-15	1.53714	-1.29448	0.457099	-0.0591809	0.552735	2
ENSG00000177519.3	RPRM	0.0217565	28	7	0.0432374	Ovary	0.7416	Esophagus_Mucosa	16.8363	4.04528e-16	0.746253	-1.43749	2.02141	0.616046	1.05872	7
ENSG00000189068.9	VSTM1	0.0217893	17	5	0.0165897	Artery_Coronary	0.8769	Brain_Cortex	11.3272	3.27823e-17	0.524143	-2.39568	0.397634	-1.17405	1.01145	5
ENSG00000154265.15	ABCA5	0.0218265	45	6	0.00158465	Breast_Mammary_Tissue	0.987974	Brain_Amygdala	23.3581	1.99306e-15	0.801528	-3.15872	2.88907	-1.33672	1.74418	6
ENSG00000175899.14	A2M	0.0219098	44	2	0.006805	Spleen	0.756634	Whole_Blood	36.957	3.64272e-15	5.76786	-2.53421	2.70624	1.16619	1.24842	2
ENSG00000196684.12	HSH2D	0.0219312	24	5	0.0942177	Heart_Left_Ventricle	0.897205	Liver	14.8184	1.19155e-17	0.525057	-1.67356	1.52966	-0.0532361	0.798476	5
ENSG00000135426.15	TESPA1	0.0219332	43	3	0.00359413	Brain_Substantia_nigra	0.998595	Muscle_Skeletal	33.8506	7.47803e-16	1.2744	-2.39369	2.91175	0.556773	1.46928	3
ENSG00000112167.9	SAYSD1	0.0220425	41	6	0.01638	Skin_Sun_Exposed_Lower_leg	0.954868	Heart_Atrial_Appendage	20.3458	3.32159e-16	0.819633	-2.40034	1.34474	-0.551457	1.00909	6
ENSG00000261751.1	RP11-305A4.3	0.02211	1	1	0.02211	Testis	0.02211	Testis	1	1	1	-2.28847	-2.28847	-2.28847	NA	1
ENSG00000106006.6	HOXA6	0.0221429	27	5	0.00673192	Testis	0.588043	Muscle_Skeletal	13.5334	5.3328e-16	0.717376	-2.70982	2.63953	1.20589	1.36729	5
ENSG00000004777.18	ARHGAP33	0.0221435	45	3	0.02604	Brain_Hippocampus	0.7553	Heart_Atrial_Appendage	36.2478	2.00792e-15	2.03793	-0.508361	2.22561	1.3531	0.81016	3
ENSG00000129636.12	ITFG1	0.0221489	25	5	0.002798	Lung	0.4434	Muscle_Skeletal	9.30927	2.38408e-19	0.612528	-1.03579	2.9891	1.74278	1.00778	5
ENSG00000270419.1	CAHM	0.0221565	17	6	0.008308	Brain_Anterior_cingulate_cortex_BA24	0.5813	Esophagus_Gastroesophageal_Junction	8.35999	2.84232e-17	0.521248	-1.52725	2.63929	0.735781	1.9389	6
ENSG00000153294.11	ADGRF4	0.0221868	31	4	0.00540724	Colon_Transverse	0.801175	Vagina	17.0197	3.8911e-16	2.78088	-2.78172	2.72623	-0.523835	1.7459	4
ENSG00000124226.10	RNF114	0.0222169	46	6	0.00161827	Esophagus_Gastroesophageal_Junction	0.858914	Adipose_Subcutaneous	20.1476	8.60189e-16	0.838466	-1.78811	3.15259	0.471955	1.70655	6
ENSG00000182985.17	CADM1	0.0222219	17	10	0.027	Thyroid	0.809622	Heart_Atrial_Appendage	6.38878	1.88496e-18	0.326838	-1.94206	2.21152	-0.493483	1.22071	10
ENSG00000198000.11	NOL8	0.0222582	46	3	0.002874	Brain_Hippocampus	0.891261	Brain_Cerebellum	36.9607	6.04387e-16	3.29925	-0.210599	2.9809	0.780094	0.848037	3
ENSG00000204767.3	FAM196B	0.0223022	11	4	0.001579	Adipose_Subcutaneous	0.5806	Brain_Hypothalamus	7.03589	9.38145e-18	0.837155	0.552509	3.15976	1.49853	0.724134	4
ENSG00000184007.18	PTP4A2	0.0223198	43	2	0.00520078	Pancreas	0.3704	Artery_Aorta	36.0444	1.13528e-15	3.47552	-1.91613	2.79433	2.31771	0.744086	2
ENSG00000259225.6	RP11-1008C21.1	0.0223836	23	1	0.00767623	Artery_Tibial	0.02563	Nerve_Tibial	22.5766	1.34793e-17	22.5766	-2.66599	2.40619	-2.05658	0.977561	1
ENSG00000153140.8	CETN3	0.0224854	37	5	0.0005643	Nerve_Tibial	0.965	Brain_Amygdala	21.209	8.24066e-16	1.1757	-3.44822	1.05309	-1.32478	1.1459	5
ENSG00000213780.10	GTF2H4	0.0224899	41	10	0.00286461	Colon_Sigmoid	0.961845	Esophagus_Muscularis	15.0403	5.97229e-16	0.600284	-1.33073	2.98191	0.503427	1.03776	10
ENSG00000186297.11	GABRA5	0.022553	18	5	0.0432208	Brain_Cortex	0.9634	Thyroid	10.1255	2.81973e-17	0.53042	-2.02157	1.29656	0.0414743	0.881317	5
ENSG00000270765.5	GAS2L2	0.0225725	42	3	0.001897	Lung	0.931894	Thyroid	26.0508	9.15071e-16	6.93179	-3.1059	3.1059	0.875185	1.61481	3
ENSG00000124593.15	RP11-298J23.10	0.0226162	49	5	0.00333042	Liver	0.92857	Skin_Sun_Exposed_Lower_leg	32.5329	5.75916e-16	1.21988	-2.93547	1.94778	-0.28174	1.02758	5
ENSG00000153933.9	DGKE	0.0226287	42	3	0.0038299	Brain_Cerebellum	0.889711	Brain_Spinal_cord_cervical_c-1	26.3779	5.99071e-16	3.18066	-1.49429	2.89184	0.836159	1.04877	3
ENSG00000164163.10	ABCE1	0.0226484	16	3	0.0106135	Cells_EBV-transformed_lymphocytes	0.7295	Breast_Mammary_Tissue	12.0096	6.271e-18	0.885999	-2.55517	1.08822	-0.370335	0.797994	3
ENSG00000162894.11	FCMR	0.0226687	23	2	0.009364	Muscle_Skeletal	0.1074	Esophagus_Gastroesophageal_Junction	18.6989	3.24805e-18	3.98983	-2.40664	2.59847	-0.626026	2.2333	2
ENSG00000214776.10	RP11-726G1.1	0.0226744	46	4	0.001962	Testis	0.948655	Heart_Atrial_Appendage	33.4219	5.60698e-16	1.23978	-3.09592	1.44985	-1.53199	0.934915	4
ENSG00000172339.9	ALG14	0.0228722	49	5	0.0221261	Heart_Left_Ventricle	0.961286	Kidney_Cortex	33.3484	1.00212e-15	1.25143	-0.560547	2.2882	1.16046	0.79625	5
ENSG00000278546.1	RP1-41C23.4	0.022912	10	5	0.07788	Uterus	0.85	Heart_Atrial_Appendage	5.05192	2.33478e-17	0.419125	-1.33768	1.76312	-0.0602529	1.39437	5
ENSG00000268316.1	AC006272.2	0.0229205	8	6	0.004928	Testis	0.736	Adipose_Visceral_Omentum	3.2221	4.51454e-17	0.109075	-0.556894	2.8117	0.896378	1.39213	6
ENSG00000169783.12	LINGO1	0.0230389	32	8	0.01165	Adipose_Visceral_Omentum	0.94998	Brain_Cerebellum	13.0999	7.71382e-16	0.509158	-2.52257	1.66742	0.114839	1.00507	8
ENSG00000104833.11	TUBB4A	0.0231977	38	2	0.0106	Brain_Spinal_cord_cervical_c-1	0.934169	Esophagus_Gastroesophageal_Junction	34.8263	6.22668e-16	1.69127	-2.55562	1.19114	0.475677	0.643257	2
ENSG00000083097.14	DOPEY1	0.0232474	49	2	0.00544078	Skin_Sun_Exposed_Lower_leg	0.841042	Brain_Nucleus_accumbens_basal_ganglia	42.3705	7.70058e-16	5.41454	-1.63571	2.77971	1.57887	1.02224	2
ENSG00000228527.1	RP11-179B15.5	0.02327	1	1	0.02327	Muscle_Skeletal	0.02327	Muscle_Skeletal	1	1	1	2.26897	2.26897	2.26897	NA	1
ENSG00000160870.12	CYP3A7	0.0233635	9	3	0.01159	Esophagus_Gastroesophageal_Junction	0.2798	Cells_EBV-transformed_lymphocytes	5.73878	1.86573e-17	0.236732	-2.52439	1.08077	-0.465787	1.51229	3
ENSG00000187626.8	ZKSCAN4	0.0234307	42	3	0.0132995	Spleen	0.750847	Artery_Tibial	35.0481	8.95271e-16	1.6313	0.317523	2.47565	1.39506	0.45497	3
ENSG00000189283.9	FHIT	0.0234477	22	8	0.00599405	Esophagus_Mucosa	0.992678	Thyroid	10.6089	4.29387e-18	0.38877	-1.90239	2.74811	0.234618	1.49741	8
ENSG00000153012.11	LGI2	0.0234611	40	10	0.0030773	Nerve_Tibial	1	Breast_Mammary_Tissue	14.5156	6.93601e-16	0.565821	-2.95991	2.39032	-0.280666	1.40786	10
ENSG00000138399.17	FASTKD1	0.0234723	47	2	0.00504199	Brain_Caudate_basal_ganglia	0.06462	Skin_Not_Sun_Exposed_Suprapubic	43.5329	6.39864e-16	2.18	-1.84788	2.80434	2.49619	0.662109	2
ENSG00000172239.13	PAIP1	0.0235207	31	1	0.0188346	Breast_Mammary_Tissue	0.02588	Adipose_Visceral_Omentum	30.2428	1.68441e-15	30.2428	-2.30121	2.34879	-0.0679751	2.27389	1
ENSG00000262370.5	RP11-473M20.9	0.0235783	43	3	0.0115067	Colon_Transverse	0.962182	Brain_Spinal_cord_cervical_c-1	31.012	1.2458e-15	1.14817	-2.52692	1.13733	-0.726247	1.51513	3
ENSG00000155886.11	SLC24A2	0.0236602	10	2	0.0402662	Testis	0.8009	Pituitary	9.55773	1.61304e-19	0.44227	0.252183	2.05101	0.432065	0.568839	2
ENSG00000102445.18	RUBCNL	0.0237509	43	2	0.006525	Lung	0.1425	Thyroid	37.295	2.25333e-15	5.09218	1.46654	2.72016	2.36081	0.268462	2
ENSG00000126091.19	ST3GAL3	0.0237959	42	3	0.000925225	Brain_Hypothalamus	0.880985	Small_Intestine_Terminal_Ileum	28.9424	9.21729e-16	1.52222	-3.31233	2.65979	-0.982551	1.87399	3
ENSG00000122176.10	FMOD	0.0238024	48	3	0.07436	Ovary	0.920732	Esophagus_Gastroesophageal_Junction	38.6969	5.35991e-16	2.28152	-0.70221	1.78439	0.14723	0.692796	3
ENSG00000140795.12	MYLK3	0.0238417	4	2	0.006493	Artery_Aorta	0.01807	Brain_Cortex	3.86335	0	0.136648	-2.72179	-2.36418	-2.45358	0.178803	2
ENSG00000171643.13	S100Z	0.0238609	5	4	0.2013	Adrenal_Gland	0.8998	Spleen	3.59222	4.78082e-17	0.133111	-1.09017	1.27786	0.0123554	1.13781	4
ENSG00000170584.10	NUDCD2	0.0238657	40	3	0.00571919	Brain_Spinal_cord_cervical_c-1	0.9339	Brain_Anterior_cingulate_cortex_BA24	34.2092	4.95444e-16	2.23763	-2.76346	0.806074	-2.14006	0.826575	3
ENSG00000142082.14	SIRT3	0.0238947	48	4	0.013782	Testis	0.987865	Stomach	27.4103	2.68769e-15	1.09405	-1.37273	2.4629	0.0733778	0.922197	4
ENSG00000106327.12	TFR2	0.0239164	49	4	0.002435	Brain_Hypothalamus	0.965213	Minor_Salivary_Gland	26.2107	7.23315e-16	1.32614	-0.617289	3.0313	0.762103	1.01249	4
ENSG00000138400.12	MDH1B	0.0239692	48	4	0.000787588	Pancreas	0.826893	Heart_Left_Ventricle	34.0151	5.62289e-16	2.07085	-3.35712	1.63836	-1.04013	1.06612	4
ENSG00000166704.11	ZNF606	0.0240136	48	6	0.0364969	Heart_Atrial_Appendage	0.8378	Brain_Anterior_cingulate_cortex_BA24	20.5773	1.24693e-15	0.729732	-1.52044	2.09135	-0.52749	0.573607	6
ENSG00000267325.1	LINC01415	0.0240779	34	4	0.0003723	Brain_Amygdala	0.6595	Brain_Hippocampus	22.7507	4.29617e-16	0.805112	-3.55898	-0.440604	-1.28354	0.760279	4
ENSG00000075914.12	EXOSC7	0.0240938	46	4	0.03231	Heart_Left_Ventricle	0.960591	Pancreas	21.2445	5.69416e-16	2.97408	-2.14055	2.06581	0.251568	1.22717	4
ENSG00000105486.13	LIG1	0.0241069	43	6	0.00559524	Uterus	0.979233	Prostate	26.0545	4.44977e-16	0.98348	-2.7706	1.81986	-0.448567	1.25516	6
ENSG00000261512.2	RP11-46D6.1	0.0241115	4	2	0.008318	Brain_Cortex	0.06851	Pituitary	3.75906	3.03858e-64	0.240936	-2.63888	-1.82164	-2.02595	0.408622	2
ENSG00000113273.15	ARSB	0.0241572	48	6	0.00265226	Artery_Tibial	0.8645	Brain_Spinal_cord_cervical_c-1	28.3582	2.72607e-15	1.20723	-3.00541	2.88727	-1.27695	1.80676	6
ENSG00000139318.7	DUSP6	0.0241586	38	5	0.0006785	Testis	0.5971	Small_Intestine_Terminal_Ileum	20.9056	6.838e-16	0.904951	-1.12852	3.39812	1.34496	1.01396	5
ENSG00000272626.1	RP11-468N14.13	0.0242059	7	3	0.0311641	Pancreas	0.451225	Minor_Salivary_Gland	5.39498	1.24683e-17	0.228872	-0.781855	2.15497	1.17505	0.993616	3
ENSG00000182272.11	B4GALNT4	0.0242277	39	11	0.00563456	Breast_Mammary_Tissue	0.961161	Heart_Atrial_Appendage	14.0903	1.05524e-15	0.554949	-1.58838	2.76832	0.338219	1.16954	11
ENSG00000267673.6	FDX2	0.024268	48	5	0.000476449	Thyroid	1	Cells_Cultured_fibroblasts	31.1458	7.70124e-16	1.2503	-3.49366	0.921635	-1.44851	1.13687	5
ENSG00000272447.1	RP11-182L21.6	0.0243077	26	5	0.004694	Skin_Not_Sun_Exposed_Suprapubic	0.976804	Whole_Blood	18.2314	5.49429e-16	0.836758	0.0290766	2.82732	1.51758	0.89137	5
ENSG00000270212.1	CTD-2540B15.12	0.02438	1	1	0.02438	Adipose_Visceral_Omentum	0.02438	Adipose_Visceral_Omentum	1	1	1	-2.25109	-2.25109	-2.25109	NA	1
ENSG00000272824.1	RP6-74O6.6	0.0243909	6	2	0.1049	Brain_Anterior_cingulate_cortex_BA24	0.642136	Lung	5.67357	5.64177e-17	0.24003	-1.62155	1.62155	0.370583	1.06601	2
ENSG00000125207.7	PIWIL1	0.024431	9	3	0.0113546	Pituitary	0.8199	Ovary	6.19883	0.00451566	0.816558	-2.53159	0.961484	0.265353	1.08693	3
ENSG00000186479.4	RGS7BP	0.0245411	18	7	0.0135303	Artery_Tibial	0.918307	Colon_Sigmoid	9.14815	6.4474e-18	0.467571	-2.23102	2.4695	1.11306	1.20949	7
ENSG00000141524.15	TMC6	0.0245503	47	10	0.00267942	Brain_Hypothalamus	0.9987	Small_Intestine_Terminal_Ileum	16.7369	1.60295e-15	0.60696	-1.39901	3.00231	0.467256	0.950697	10
ENSG00000121073.13	SLC35B1	0.0245647	46	3	0.00375056	Heart_Left_Ventricle	0.919503	Stomach	34.8651	1.58321e-15	1.68165	0.101059	2.89841	1.66521	0.66866	3
ENSG00000171804.10	WDR87	0.0245785	5	3	0.0240218	Thyroid	0.4257	Brain_Hypothalamus	3.08142	3.35019e-12	0.469292	-0.806485	2.25678	0.719329	1.5075	3
ENSG00000205927.4	OLIG2	0.0246272	5	5	0.150693	Whole_Blood	0.9587	Lung	1.92929	0.126282	0.126282	-1.43709	0.70325	-0.327453	0.792605	5
ENSG00000135218.17	CD36	0.0246939	24	4	0.0034471	Whole_Blood	0.704625	Ovary	13.1464	2.67049e-19	0.995331	-0.794508	2.92477	0.437171	0.808756	4
ENSG00000095627.9	TDRD1	0.0247143	28	1	0.02413	Brain_Cortex	0.43612	Artery_Coronary	27.0024	2.50065e-15	27.0024	-2.25505	-0.778762	-2.19676	0.279458	1
ENSG00000266265.2	KLF14	0.0247246	9	4	0.01645	Adipose_Visceral_Omentum	0.573	Skin_Sun_Exposed_Lower_leg	3.94174	2.28149e-17	1.00253	-1.96237	2.39878	0.0297433	1.42743	4
ENSG00000260769.1	RP11-491F9.5	0.0247456	11	5	0.002006	Breast_Mammary_Tissue	0.958636	Brain_Cerebellum	7.2174	4.43687e-19	0.315877	-1.46252	3.08934	0.00851419	1.12709	5
ENSG00000173868.11	PHOSPHO1	0.0247698	29	4	0.005294	Breast_Mammary_Tissue	0.9194	Artery_Aorta	23.4671	4.54852e-16	0.941576	-2.78858	2.78858	1.77538	1.00454	4
ENSG00000227456.7	LINC00310	0.0248213	39	6	0.004953	Small_Intestine_Terminal_Ileum	0.960912	Brain_Anterior_cingulate_cortex_BA24	21.4583	8.89048e-16	0.859366	-2.81007	2.81007	0.536227	1.9683	6
ENSG00000111269.2	CREBL2	0.0248308	21	7	0.01709	Esophagus_Muscularis	0.5264	Vagina	12.6748	4.5968e-18	0.621877	-1.65746	2.38477	0.0813415	1.1836	7
ENSG00000111816.7	FRK	0.0248317	42	4	0.00518075	Cells_EBV-transformed_lymphocytes	0.828134	Testis	30.8306	1.64689e-15	1.21872	-2.19724	2.79557	0.652575	1.45803	4
ENSG00000112077.15	RHAG	0.0248541	24	4	0.0241319	Testis	0.3719	Nerve_Tibial	16.2962	1.66465e-18	0.723779	-2.25502	0.89292	-1.67451	0.851227	4
ENSG00000065000.15	AP3D1	0.024912	32	6	0.04408	Brain_Cortex	0.9662	Brain_Cerebellar_Hemisphere	17.897	8.62152e-16	0.687117	-0.874768	2.01333	0.840852	0.727639	6
ENSG00000070031.3	SCT	0.0249167	21	8	0.01367	Cells_EBV-transformed_lymphocytes	0.5555	Vagina	8.88964	6.01619e-18	0.348878	-2.46582	1.94488	-0.292314	1.98107	8
ENSG00000136643.11	RPS6KC1	0.0249196	22	3	0.01425	Brain_Cerebellar_Hemisphere	0.3964	Brain_Amygdala	20.0257	9.4617e-18	0.9737	0.848068	2.4509	0.960426	0.375257	3
ENSG00000112578.9	BYSL	0.0249355	40	3	0.003455	Spleen	0.777311	Adipose_Subcutaneous	29.5113	2.89268e-15	1.1193	-2.92406	0.756471	-1.6825	0.75221	3
ENSG00000147592.8	LACTB2	0.02495	39	3	0.0106813	Brain_Amygdala	0.867129	Muscle_Skeletal	31.4001	4.90184e-16	2.62245	-0.829428	2.55296	0.852271	0.946777	3
ENSG00000269439.5	CTD-3131K8.2	0.0249572	34	8	0.01045	Brain_Cerebellar_Hemisphere	0.827214	Cells_Cultured_fibroblasts	19.2598	6.3568e-16	0.809984	-2.56057	2.56057	0.884262	1.64846	8
ENSG00000198914.3	POU3F3	0.0249597	17	4	0.001152	Brain_Putamen_basal_ganglia	0.8784	Adipose_Subcutaneous	11.6699	8.45728e-19	0.663624	-3.25051	3.25051	-0.358886	2.70921	4
ENSG00000172425.10	TTC36	0.02496	1	1	0.02496	Liver	0.02496	Liver	1	1	1	-2.24202	-2.24202	-2.24202	NA	1
ENSG00000246863.2	RP11-325N19.3	0.024963	1	1	0.024963	Testis	0.024963	Testis	1	1	1	2.24197	2.24197	2.24197	NA	1
ENSG00000241544.1	LINC02029	0.0249718	10	2	0.009229	Brain_Putamen_basal_ganglia	0.4541	Heart_Atrial_Appendage	8.92072	1.1362e-18	0.952399	-0.748597	2.60345	2.06685	1.13868	2
ENSG00000240440.1	AC007879.3	0.0249735	3	3	0.0265359	Cells_Cultured_fibroblasts	0.603	Testis	1.55713	0.420469	0.420469	-2.21828	0.520091	-0.917092	1.37424	3
ENSG00000267289.1	CTD-2623N2.11	0.0249774	38	2	0.00723987	Nerve_Tibial	0.176481	Cells_Cultured_fibroblasts	35.9094	1.33053e-15	1.82266	-2.6856	-1.35167	-2.33044	0.312815	2
ENSG00000107651.12	SEC23IP	0.0250389	46	6	0.00718481	Spleen	0.9378	Brain_Spinal_cord_cervical_c-1	18.5361	9.11723e-16	0.800968	-2.68815	1.88517	0.35449	1.1581	6
ENSG00000162510.5	MATN1	0.0251173	20	5	0.0296974	Thyroid	0.9623	Whole_Blood	10.484	7.78084e-19	0.55656	-2.1741	2.09942	-0.963915	1.44439	5
ENSG00000186532.11	SMYD4	0.0251477	42	4	0.116657	Brain_Cerebellar_Hemisphere	0.997682	Colon_Sigmoid	29.5965	8.52011e-16	1.14466	-1.28699	1.56896	0.539688	0.757087	4
ENSG00000178821.12	TMEM52	0.0251507	45	3	0.00175832	Heart_Left_Ventricle	0.999678	Skin_Not_Sun_Exposed_Suprapubic	30.8674	6.02729e-16	1.59732	-2.49572	3.12828	1.8087	1.61981	3
ENSG00000178057.14	NDUFAF3	0.0251993	30	2	0.003744	Brain_Amygdala	0.254	Skin_Sun_Exposed_Lower_leg	26.8558	1.35422e-15	2.97511	-2.89896	-1.14069	-2.10359	0.632221	2
ENSG00000139173.9	TMEM117	0.0252379	45	4	0.03113	Brain_Amygdala	0.8014	Thyroid	35.1694	4.2372e-16	1.31355	-2.15541	2.15541	1.14799	1.46145	4
ENSG00000241058.3	NSUN6	0.0252695	47	3	0.04953	Liver	0.908879	Uterus	40.3665	1.20268e-15	2.09745	-1.964	1.34353	-0.705388	0.701813	3
ENSG00000002746.14	HECW1	0.0253118	24	8	0.0524135	Thyroid	0.8479	Esophagus_Mucosa	9.80405	2.18594e-18	0.387744	-1.20326	1.93972	0.153154	1.06939	8
ENSG00000277999.1	RP11-426C22.8	0.0253298	23	8	0.0004244	Heart_Left_Ventricle	0.992586	Stomach	10.4503	1.45635e-17	0.451098	-3.52443	3.52443	-0.652029	1.58296	8
ENSG00000185198.11	PRSS57	0.0253611	11	3	0.009008	Adipose_Visceral_Omentum	0.7358	Spleen	7.6294	1.49138e-18	0.906183	0.33742	2.61175	2.12675	0.79436	3
ENSG00000272523.1	LINC01023	0.0253906	38	3	0.00250199	Brain_Anterior_cingulate_cortex_BA24	0.9722	Muscle_Skeletal	32.957	6.94522e-16	1.20087	-2.97801	3.0231	2.55058	1.13209	3
ENSG00000124570.17	SERPINB6	0.0254243	41	8	0.00979413	Whole_Blood	0.956063	Skin_Sun_Exposed_Lower_leg	14.1247	1.24331e-15	0.647547	-2.58301	1.92852	-0.761796	1.22375	8
ENSG00000196646.11	ZNF136	0.0254466	5	2	0.008505	Pituitary	0.1333	Cells_EBV-transformed_lymphocytes	4.14633	1.01906e-16	0.853669	-1.50121	2.63134	-0.0742188	1.99443	2
ENSG00000074695.5	LMAN1	0.0254517	22	4	0.1778	Brain_Caudate_basal_ganglia	0.9598	Muscle_Skeletal	15.744	8.84843e-18	0.534674	-1.34756	1.32582	-0.747214	0.966668	4
ENSG00000133063.15	CHIT1	0.0254598	34	7	0.000927981	Muscle_Skeletal	0.9238	Brain_Frontal_Cortex_BA9	15.3966	6.67491e-16	0.895573	-2.42853	3.3115	0.902611	1.56129	7
ENSG00000196313.11	POM121	0.0254655	4	3	0.06723	Breast_Mammary_Tissue	0.953	Skin_Sun_Exposed_Lower_leg	2.70279	1.21741e-16	0.314052	-0.0589399	1.83013	1.12212	0.90419	3
ENSG00000111644.7	ACRBP	0.0254784	47	3	0.003275	Adipose_Subcutaneous	0.989791	Cells_Cultured_fibroblasts	24.1772	6.8377e-16	6.01195	-2.94067	0.58522	-0.370373	1.14514	3
ENSG00000267659.5	LINC01482	0.0255141	11	2	0.03285	Breast_Mammary_Tissue	0.8026	Minor_Salivary_Gland	9.11517	1.41371e-17	1.43767	-1.04859	2.13391	0.253974	1.10351	2
ENSG00000271850.1	RP11-16D22.2	0.0255231	5	3	0.04553	Brain_Substantia_nigra	0.6726	Pancreas	3.08447	2.17844e-16	0.539774	-1.99972	1.60816	0.649468	1.5674	3
ENSG00000163812.13	ZDHHC3	0.0257379	31	3	0.0279324	Ovary	0.660133	Artery_Tibial	20.1228	3.07229e-16	1.25749	-2.19823	2.14055	-1.63158	0.795601	3
ENSG00000164930.11	FZD6	0.0258181	46	5	0.05439	Pancreas	0.989753	Liver	26.8211	1.88155e-15	1.25685	-1.92372	1.92372	-0.211171	0.903339	5
ENSG00000131462.7	TUBG1	0.025837	45	3	0.0523166	Pancreas	0.982814	Brain_Cortex	35.876	6.01945e-16	1.52033	-1.94052	1.49085	0.229243	1.29652	3
ENSG00000003436.15	TFPI	0.0259605	28	4	0.00169817	Artery_Tibial	0.6283	Esophagus_Mucosa	19.3231	1.84382e-15	0.894819	-3.1385	2.56628	-0.954508	1.11388	4
ENSG00000007264.14	MATK	0.0259712	4	4	0.03583	Skin_Not_Sun_Exposed_Suprapubic	0.608907	Cells_Cultured_fibroblasts	1.77093	0.453456	0.453456	-0.926088	2.09885	0.281166	1.35667	4
ENSG00000270321.1	RP11-2L8.2	0.0259779	2	1	0.0172471	Brain_Frontal_Cortex_BA9	0.03871	Brain_Cortex	1.99602	0.00397769	1.99602	2.06726	2.3814	2.22433	0.222131	1
ENSG00000206531.10	CD200R1L	0.02598	1	1	0.02598	Testis	0.02598	Testis	1	1	1	2.22651	2.22651	2.22651	NA	1
ENSG00000105865.10	DUS4L	0.0260038	13	2	0.08266	Adrenal_Gland	0.5546	Esophagus_Muscularis	10.8503	4.27983e-19	2.10911	-1.73546	0.699403	-1.01131	1.13089	2
ENSG00000162408.10	NOL9	0.0260853	38	1	0.001499	Esophagus_Mucosa	0.074	Cells_Cultured_fibroblasts	37.5118	3.96022e-16	37.5118	-3.17488	3.17488	-1.04878	2.01751	1
ENSG00000143486.15	EIF2D	0.026096	47	4	0.0006371	Brain_Amygdala	0.6221	Brain_Spinal_cord_cervical_c-1	36.3273	5.83531e-16	2.01939	-3.41531	1.41557	-1.53227	1.08869	4
ENSG00000132334.16	PTPRE	0.0262391	26	10	0.009028	Brain_Cerebellum	0.873634	Lung	9.23052	3.54357e-16	0.355704	-2.61099	1.24817	-0.122729	0.996031	10
ENSG00000140263.13	SORD	0.0262409	33	3	0.033849	Cells_Cultured_fibroblasts	0.679595	Esophagus_Mucosa	20.454	4.00969e-16	1.98861	-2.12187	2.02327	-0.513712	1.62967	3
ENSG00000214189.8	ZNF788	0.0262995	32	4	0.004747	Cells_Cultured_fibroblasts	1	Brain_Frontal_Cortex_BA9	20.6184	3.30113e-16	1.60235	-1.21003	2.82372	0.691535	0.91756	4
ENSG00000196126.11	HLA-DRB1	0.0263962	22	7	0.00348658	Brain_Frontal_Cortex_BA9	0.9808	Heart_Left_Ventricle	9.67664	5.43416e-18	0.435649	-1.97932	2.92123	0.930852	1.11839	7
ENSG00000249464.5	LINC01091	0.0263967	15	12	0.0171	Stomach	0.971009	Lung	4.26832	7.02017e-18	0.143809	-2.38455	1.79196	-0.451215	1.15574	12
ENSG00000077092.18	RARB	0.0264762	35	2	0.004465	Artery_Tibial	0.574498	Esophagus_Mucosa	31.1444	1.92224e-15	2.36528	-2.84329	2.84329	-2.1558	1.21992	2
ENSG00000138796.16	HADH	0.0264848	47	2	0.003976	Colon_Transverse	0.482063	Pancreas	41.6948	5.56019e-16	3.04399	-2.88006	2.88006	1.48587	1.22662	2
ENSG00000275765.5	RP11-54C4.3	0.0264937	49	2	0.009932	Brain_Substantia_nigra	0.8654	Muscle_Skeletal	40.3834	5.81935e-16	7.78926	-2.57819	1.77996	0.131546	1.1048	2
ENSG00000150527.16	CTAGE5	0.0265019	47	4	0.000509	Heart_Atrial_Appendage	0.72422	Ovary	28.3207	2.74188e-15	1.99223	-1.64918	3.47597	1.36117	1.31997	4
ENSG00000266094.7	RASSF5	0.0265225	40	5	0.000999966	Thyroid	0.9847	Brain_Hypothalamus	25.4593	5.79984e-16	1.04824	-3.29054	1.20605	-0.478742	1.05728	5
ENSG00000106263.17	EIF3B	0.0265393	48	2	0.00201694	Brain_Cerebellum	0.466777	Cells_Cultured_fibroblasts	41.5797	3.64432e-16	5.73236	0.727734	3.08773	2.11884	0.520417	2
ENSG00000215186.6	GOLGA6B	0.0265817	2	2	0.2369	Testis	0.9791	Nerve_Tibial	1.90266	0.0973416	0.0973416	-1.18277	-0.0261973	-0.604484	0.817821	2
ENSG00000261701.6	HPR	0.0266348	42	6	0.00407861	Colon_Sigmoid	0.7709	Adipose_Subcutaneous	20.4803	7.10343e-16	0.810574	-2.31526	2.87202	0.197465	1.87709	6
ENSG00000100442.10	FKBP3	0.02672	22	1	0.02672	Brain_Cortex	0.02672	Adipose_Subcutaneous	22	5.29919e-18	22	-2.21558	2.21558	-2.01417	0.944728	1
ENSG00000154839.9	SKA1	0.0267352	36	3	0.00763101	Cells_Cultured_fibroblasts	0.992213	Esophagus_Mucosa	17.4606	2.98874e-16	6.94878	-2.66797	2.11629	-0.132445	1.67238	3
ENSG00000187800.13	PEAR1	0.0267708	41	1	0.01059	Artery_Coronary	0.152234	Minor_Salivary_Gland	39.6549	9.67854e-16	39.6549	-2.55594	2.55594	0.814313	2.06956	1
ENSG00000196381.10	ZNF781	0.0268422	48	3	0.000885222	Heart_Left_Ventricle	0.8071	Stomach	41.1266	7.1013e-16	1.50963	-3.32467	-0.244169	-2.7285	0.526087	3
ENSG00000113328.18	CCNG1	0.0268659	12	4	0.000258	Heart_Left_Ventricle	0.8744	Stomach	5.85625	2.49267e-18	0.408902	-3.65419	3.65419	-0.26436	2.24091	4
ENSG00000131668.13	BARX1	0.0270425	28	4	0.227051	Artery_Aorta	0.932861	Colon_Transverse	19.4938	7.82053e-16	1.00203	-1.20799	1.15473	-0.118103	1.03855	4
ENSG00000131848.9	ZSCAN5A	0.0270511	11	8	0.0006017	Brain_Caudate_basal_ganglia	0.8009	Esophagus_Muscularis	4.25965	3.0542e-17	0.158994	-0.490896	3.43085	0.858033	1.12107	8
ENSG00000084754.10	HADHA	0.0270843	44	2	0.0111935	Brain_Anterior_cingulate_cortex_BA24	0.921704	Spleen	41.2199	7.97216e-16	2.35506	-1.29535	2.5366	0.273072	0.847773	2
ENSG00000168243.10	GNG4	0.027179	30	4	0.00115872	Prostate	0.386987	Brain_Putamen_basal_ganglia	21.396	3.61543e-16	0.751576	-1.86069	3.24885	2.20431	1.06692	4
ENSG00000100036.12	SLC35E4	0.0272383	42	10	0.00548919	Muscle_Skeletal	0.998002	Brain_Spinal_cord_cervical_c-1	15.151	1.45834e-15	0.595314	-2.1017	2.77683	0.833333	1.04495	10
ENSG00000198768.10	APCDD1L	0.0273339	31	5	0.00558	Kidney_Cortex	0.997224	Cells_Cultured_fibroblasts	17.7417	4.05618e-16	0.818453	-2.77149	2.49827	0.195656	1.08203	5
ENSG00000163288.13	GABRB1	0.027335	5	2	0.183452	Heart_Atrial_Appendage	0.27959	Heart_Left_Ventricle	3.9959	3.65364e-17	0.99173	-1.3302	1.26771	0.268199	1.34853	2
ENSG00000129946.10	SHC2	0.0273573	48	4	0.00572352	Cells_Cultured_fibroblasts	0.970807	Skin_Not_Sun_Exposed_Suprapubic	32.696	2.948e-15	1.11513	-2.76321	1.85804	-0.243307	1.1693	4
ENSG00000162931.11	TRIM17	0.0273724	44	3	0.00924044	Esophagus_Muscularis	0.975906	Esophagus_Gastroesophageal_Junction	37.5242	1.32578e-15	1.49385	-2.60303	1.32377	-0.268583	0.831711	3
ENSG00000255363.2	RP11-672A2.5	0.0273777	9	4	0.009513	Brain_Nucleus_accumbens_basal_ganglia	0.7067	Cells_Cultured_fibroblasts	5.84913	6.60407e-17	0.463305	-1.57351	2.59305	-0.00754962	1.1679	4
ENSG00000044012.3	GUCA2B	0.02744	7	1	0.02744	Pancreas	0.02744	Testis	7	2.15352e-32	7	-2.2052	-2.2052	-2.2052	4.44089e-16	1
ENSG00000272343.1	RP11-140I16.3	0.0274568	20	4	0.00585792	Skin_Sun_Exposed_Lower_leg	0.890154	Brain_Cortex	8.40673	1.68724e-17	0.936987	-1.82244	2.75563	0.571849	1.815	4
ENSG00000076555.15	ACACB	0.0275797	40	8	0.00134691	Artery_Tibial	0.9	Heart_Left_Ventricle	18.1273	6.12632e-16	0.613912	-1.4863	3.20579	0.537954	1.28545	8
ENSG00000166797.10	FAM96A	0.0276146	10	4	0.01294	Breast_Mammary_Tissue	0.3576	Brain_Cortex	6.00163	1.62679e-33	0.509795	-2.08931	2.48542	1.20786	1.52933	4
ENSG00000173660.11	UQCRH	0.0276629	41	2	0.02192	Brain_Spinal_cord_cervical_c-1	0.8719	Adipose_Subcutaneous	37.5613	1.18505e-15	2.02133	-2.29175	1.47053	0.702751	0.926951	2
ENSG00000187815.9	ZFP69	0.0276723	49	3	0.0198894	Prostate	0.57433	Testis	44.2805	1.91557e-15	1.84658	0.561686	2.32843	1.77121	0.517542	3
ENSG00000107331.16	ABCA2	0.0276931	27	4	0.07092	Brain_Spinal_cord_cervical_c-1	0.9761	Brain_Caudate_basal_ganglia	21.4603	2.08705e-15	0.963175	-1.80599	1.80599	-0.282247	1.0369	4
ENSG00000106541.11	AGR2	0.0277133	27	4	0.00169413	Testis	0.9845	Brain_Cerebellar_Hemisphere	13.0768	5.06965e-16	1.59691	-3.13919	2.74031	-0.77602	1.70689	4
ENSG00000170322.14	NFRKB	0.0277208	49	4	0.000761742	Ovary	0.890024	Whole_Blood	38.5494	3.78842e-15	1.54698	-0.138274	3.36633	2.3395	0.772861	4
ENSG00000152034.10	MCHR2	0.0277941	8	5	0.0173034	Brain_Caudate_basal_ganglia	0.78314	Brain_Putamen_basal_ganglia	4.04744	7.94857e-18	0.207368	-1.44343	2.3802	0.543637	1.03495	5
ENSG00000151322.18	NPAS3	0.0279439	42	7	0.001129	Brain_Caudate_basal_ganglia	0.971117	Brain_Putamen_basal_ganglia	18.7625	7.05826e-16	0.798523	-3.25624	1.72643	-0.0569252	0.802146	7
ENSG00000145626.11	UGT3A1	0.027944	4	4	0.04463	Pituitary	0.8678	Small_Intestine_Terminal_Ileum	2.19718	0.286147	0.286147	-2.00813	0.413828	-0.343115	1.14184	4
ENSG00000197261.11	C6orf141	0.0279685	48	6	0.01176	Brain_Nucleus_accumbens_basal_ganglia	0.885756	Esophagus_Gastroesophageal_Junction	19.9515	5.28234e-16	1.67351	-1.69968	2.51927	-0.270189	1.26903	6
ENSG00000249490.1	LINC02146	0.02798	1	1	0.02798	Testis	0.02798	Testis	1	1	1	-2.19757	-2.19757	-2.19757	NA	1
ENSG00000171303.6	KCNK3	0.0280034	21	4	0.01811	Artery_Coronary	0.9933	Adipose_Subcutaneous	15.8885	1.93965e-17	0.925263	-2.02967	2.36336	0.191073	1.12492	4
ENSG00000008118.9	CAMK1G	0.0280499	34	3	0.054462	Brain_Cerebellum	0.967684	Cells_Cultured_fibroblasts	29.7477	1.20192e-15	1.10533	-1.92314	1.39605	-0.927913	1.05397	3
ENSG00000197119.12	SLC25A29	0.0281042	48	5	0.0003985	Brain_Spinal_cord_cervical_c-1	0.859774	Small_Intestine_Terminal_Ileum	24.9502	6.9786e-16	1.01895	-3.54108	1.05834	-1.91668	1.44953	5
ENSG00000213995.11	NAXD	0.0281183	43	3	0.00208836	Cells_Cultured_fibroblasts	0.8887	Brain_Hippocampus	20.4824	6.55654e-16	7.95668	-0.139949	3.07737	1.65407	0.902199	3
ENSG00000163637.12	PRICKLE2	0.0281828	31	8	0.00587768	Cells_Cultured_fibroblasts	0.7861	Whole_Blood	19.2498	7.71168e-16	0.754636	-2.75453	1.61505	-0.116322	1.07951	8
ENSG00000040731.10	CDH10	0.0282612	19	4	0.001606	Brain_Cerebellar_Hemisphere	0.8117	Brain_Hippocampus	14.0869	5.17671e-19	0.865287	-3.15481	3.15481	-0.957804	2.48023	4
ENSG00000246777.1	RP11-61A14.4	0.0283057	17	2	0.312	Adipose_Subcutaneous	0.914286	Brain_Putamen_basal_ganglia	16.0962	2.77534e-17	0.875379	-0.60949	1.01103	-0.232793	0.644114	2
ENSG00000271830.1	RP11-1C8.7	0.0283427	19	2	0.00739595	Brain_Cerebellar_Hemisphere	0.341749	Thyroid	18.2207	4.37785e-17	0.629188	0.950715	2.67847	1.91105	0.534768	2
ENSG00000213463.4	SYNJ2BP	0.0283485	46	5	0.0155719	Cells_EBV-transformed_lymphocytes	0.9514	Colon_Transverse	31.0932	8.22726e-16	2.35776	-0.717444	2.4188	1.37245	0.947708	5
ENSG00000129353.14	SLC44A2	0.0284203	44	4	0.00168935	Heart_Left_Ventricle	0.229777	Muscle_Skeletal	26.2809	7.98702e-16	1.25296	-2.83212	3.14002	2.16609	1.09558	4
ENSG00000065615.13	CYB5R4	0.0284527	47	2	0.00547362	Colon_Transverse	0.05444	Artery_Aorta	43.8652	8.40795e-16	2.85402	-2.77775	1.92332	-1.77459	1.0044	2
ENSG00000198218.10	QRICH1	0.0284728	43	1	0.008435	Adipose_Visceral_Omentum	0.1848	Brain_Hippocampus	41.6066	2.45181e-15	41.6066	1.32612	2.63414	2.15035	0.213016	1
ENSG00000180479.13	ZNF571	0.0284963	48	3	0.0012082	Brain_Cerebellum	0.389313	Testis	41.7778	7.03726e-16	1.70477	-3.23694	0.860865	-2.47347	0.674541	3
ENSG00000163328.13	GPR155	0.0285683	39	7	0.0032374	Skin_Not_Sun_Exposed_Suprapubic	0.9977	Nerve_Tibial	20.7617	4.16171e-16	0.88869	-2.94425	2.53244	-0.819991	1.12583	7
ENSG00000162892.15	IL24	0.0286712	10	3	0.1231	Pituitary	0.9411	Muscle_Skeletal	5.914	5.47477e-18	0.275857	-1.3	1.54189	-0.250079	1.29049	3
ENSG00000231507.1	LINC01353	0.0287394	15	6	0.0102498	Muscle_Skeletal	0.4649	Colon_Sigmoid	7.71945	9.25526e-19	0.261607	-2.56729	1.46881	-1.25067	1.44075	6
ENSG00000253417.5	LINC02159	0.0287663	9	2	0.0018643	Esophagus_Mucosa	0.02857	Colon_Transverse	8.00787	5.66637e-17	0.952941	-3.11104	-2.18937	-2.34329	0.314499	2
ENSG00000173918.14	C1QTNF1	0.0288517	45	2	0.00575543	Heart_Atrial_Appendage	0.5261	Esophagus_Muscularis	37.7165	1.41664e-15	6.2706	0.633971	2.7614	1.99403	0.321587	2
ENSG00000135930.13	EIF4E2	0.0288775	21	5	0.01242	Testis	0.8743	Esophagus_Mucosa	11.3717	2.05871e-17	0.435506	-2.06019	2.49998	-0.0924308	1.4385	5
ENSG00000101638.13	ST8SIA5	0.0289208	16	8	0.0121156	Brain_Cerebellum	0.890026	Thyroid	6.18013	3.49308e-17	0.535808	-2.50876	1.03266	-0.354935	0.960625	8
ENSG00000274021.1	RP11-823E8.3	0.0289208	41	5	0.001921	Brain_Cerebellar_Hemisphere	0.983492	Liver	19.3972	8.06949e-16	0.912185	-2.90641	3.10218	1.58196	1.41759	5
ENSG00000137054.15	POLR1E	0.0289471	37	6	0.0172227	Skin_Sun_Exposed_Lower_leg	0.9788	Lung	14.9158	1.1654e-15	0.74867	-2.38192	1.82627	-0.952233	1.06611	6
ENSG00000181885.18	CLDN7	0.0289556	48	6	0.02074	Brain_Substantia_nigra	0.974011	Brain_Hypothalamus	25.714	2.41171e-15	1.16484	-2.14329	2.31268	-0.408345	1.29613	6
ENSG00000162972.10	MAIP1	0.0289701	47	4	0.01942	Brain_Frontal_Cortex_BA9	0.8839	Colon_Sigmoid	26.6164	1.12355e-15	3.99149	-2.19813	2.33737	-0.357353	1.6766	4
ENSG00000156381.8	ANKRD9	0.0290043	47	3	0.00261701	Heart_Left_Ventricle	0.975124	Skin_Sun_Exposed_Lower_leg	35.7946	3.57703e-16	2.21255	-2.46342	3.00947	0.255954	1.21654	3
ENSG00000175782.9	SLC35E3	0.0290193	41	5	0.0736377	Brain_Spinal_cord_cervical_c-1	0.9548	Brain_Cerebellum	23.5448	8.50292e-16	1.09392	-1.78886	1.76129	-0.510335	0.968605	5
ENSG00000186198.3	SLC51B	0.0290263	18	4	0.05032	Esophagus_Gastroesophageal_Junction	0.8375	Artery_Aorta	11.7568	1.42505e-19	0.552416	-1.95723	0.922247	-0.494985	0.771114	4
ENSG00000088035.15	ALG6	0.0290769	48	4	0.0008778	Esophagus_Mucosa	0.8378	Nerve_Tibial	34.6146	2.16865e-15	1.16086	-3.32702	2.33223	-0.630119	1.37763	4
ENSG00000146809.12	ASB15	0.0291602	5	4	0.0283784	Muscle_Skeletal	0.40103	Heart_Atrial_Appendage	2.55613	0.069651	0.125462	-2.19201	2.06875	-0.786219	1.67135	4
ENSG00000031823.14	RANBP3	0.0291642	40	3	0.0253339	Thyroid	0.385573	Brain_Substantia_nigra	29.0269	1.65693e-15	1.89294	-2.23627	1.63048	-1.06194	0.598536	3
ENSG00000134352.19	IL6ST	0.0292376	36	2	0.04502	Adipose_Subcutaneous	0.2244	Brain_Anterior_cingulate_cortex_BA24	34.017	1.42202e-15	1.34239	-2.00447	2.00447	-0.799052	1.84219	2
ENSG00000234210.1	AC006372.4	0.0292667	5	4	0.003373	Pituitary	0.7783	Brain_Hypothalamus	2.56786	0	0.224968	-2.93153	0.281535	-1.21938	1.29038	4
ENSG00000128609.14	NDUFA5	0.0293918	38	4	0.00829155	Uterus	0.9569	Esophagus_Muscularis	28.651	2.1108e-15	1.14905	-2.63996	2.62799	-1.58225	1.75361	4
ENSG00000101076.16	HNF4A	0.0294427	3	1	0.02594	Brain_Frontal_Cortex_BA9	0.03488	Brain_Cortex	2.96904	0.00462222	2.96904	2.10975	2.22711	2.16636	0.0587889	1
ENSG00000134504.12	KCTD1	0.0294586	19	12	0.03994	Brain_Cerebellar_Hemisphere	0.8771	Nerve_Tibial	5.75315	7.33743e-18	0.255448	-1.83087	2.05437	0.0351129	1.07749	12
ENSG00000229557.1	LINC00379	0.02954	1	1	0.02954	Kidney_Cortex	0.02954	Kidney_Cortex	1	1	1	-2.1762	-2.1762	-2.1762	NA	1
ENSG00000248712.7	CCDC153	0.0295423	38	3	0.06208	Esophagus_Muscularis	0.984808	Esophagus_Mucosa	27.2854	4.12252e-16	2.97927	-1.86572	1.22946	-0.109671	1.14538	3
ENSG00000169242.11	EFNA1	0.0295755	46	3	0.00281422	Cells_EBV-transformed_lymphocytes	0.8402	Artery_Coronary	28.7825	9.0613e-16	6.22819	-2.98733	0.463526	-1.70541	0.763023	3
ENSG00000123810.7	B9D2	0.029595	31	2	0.01639	Brain_Cerebellum	0.2842	Adrenal_Gland	28.2185	2.24258e-15	1.86587	-2.40011	-1.07093	-1.50793	0.449347	2
ENSG00000163050.16	COQ8A	0.0296531	45	6	0.0674	Brain_Amygdala	0.9876	Brain_Hippocampus	27.2934	5.88788e-16	1.70575	-1.829	1.829	0.737373	1.08691	6
ENSG00000184922.13	FMNL1	0.0296613	24	4	0.02085	Brain_Caudate_basal_ganglia	0.2557	Muscle_Skeletal	18.878	4.82758e-18	0.927529	-2.31069	2.31069	-1.0601	1.94001	4
ENSG00000161204.11	ABCF3	0.0296625	31	7	0.005173	Artery_Tibial	0.923057	Colon_Transverse	18.2564	6.04619e-16	0.685281	-2.79606	1.62942	0.662042	0.910532	7
ENSG00000182134.15	TDRKH	0.0297088	44	3	0.008969	Artery_Coronary	0.8441	Brain_Anterior_cingulate_cortex_BA24	27.9114	5.52107e-16	1.0387	-1.99374	2.61323	1.42037	0.858983	3
ENSG00000132718.8	SYT11	0.02986	36	1	0.02986	Brain_Anterior_cingulate_cortex_BA24	0.02986	Breast_Mammary_Tissue	36	1.45592e-15	36	-2.17194	2.17194	-1.56863	1.52356	1
ENSG00000100934.14	SEC23A	0.02998	48	5	0.00433774	Cells_Cultured_fibroblasts	0.996175	Heart_Atrial_Appendage	24.5214	7.47847e-16	2.30592	-2.8525	2.18799	-1.19695	1.25944	5
ENSG00000164647.8	STEAP1	0.0300312	39	3	0.0121	Nerve_Tibial	0.9271	Heart_Atrial_Appendage	31.4837	7.41174e-16	2.44462	-2.50921	2.50921	-0.690466	1.92709	3
ENSG00000112294.12	ALDH5A1	0.0300442	49	5	0.1205	Stomach	0.999578	Nerve_Tibial	30.4465	7.00447e-16	1.10455	-1.55268	1.34751	0.140575	0.794941	5
ENSG00000070761.7	CFAP20	0.0300673	42	4	0.00290815	Nerve_Tibial	0.9514	Brain_Putamen_basal_ganglia	23.525	8.21345e-16	0.999154	-2.97728	2.59319	0.133209	1.6648	4
ENSG00000214753.2	HNRNPUL2	0.030102	11	2	0.008953	Brain_Cerebellum	0.3886	Adipose_Subcutaneous	8.91854	7.75044e-17	1.84112	0.862159	2.61384	1.92164	0.671718	2
ENSG00000174059.16	CD34	0.0301278	43	2	0.012	Brain_Cerebellar_Hemisphere	0.9889	Spleen	37.095	8.57521e-16	4.31151	-2.51214	2.51214	1.85001	1.49825	2
ENSG00000158023.9	WDR66	0.030188	48	4	0.00150943	Adipose_Visceral_Omentum	0.998563	Small_Intestine_Terminal_Ileum	30.5656	7.21824e-16	1.90568	-1.13498	3.17286	1.09089	0.971027	4
ENSG00000259113.1	RP11-406H23.2	0.0301901	2	2	0.01429	Nerve_Tibial	0.426	Colon_Sigmoid	1.08159	0.918414	0.918414	0.796055	2.44989	1.62297	1.16944	2
ENSG00000060709.14	RIMBP2	0.0302068	27	12	9.037e-05	Brain_Cerebellar_Hemisphere	0.9365	Liver	10.5196	7.2167e-16	0.456775	-2.41489	3.91509	0.187412	1.99517	12
ENSG00000113638.13	TTC33	0.0303018	48	3	0.01658	Adipose_Subcutaneous	0.939331	Whole_Blood	40.5275	5.8717e-16	2.18996	-2.39589	1.38609	0.269525	0.719775	3
ENSG00000267796.7	LIN37	0.0303146	47	2	0.06042	Vagina	0.897	Thyroid	42.7551	6.87003e-16	3.89724	-1.87772	0.36944	-0.115087	0.762689	2
ENSG00000197122.11	SRC	0.0303898	46	4	0.00324047	Ovary	0.8569	Adipose_Visceral_Omentum	22.1065	7.0905e-16	0.984026	-2.94395	2.93439	-0.54727	1.97114	4
ENSG00000165300.7	SLITRK5	0.0304154	22	5	0.01743	Spleen	0.8223	Adipose_Visceral_Omentum	16.6054	3.33361e-17	0.880017	-0.98872	2.37751	0.118525	0.876853	5
ENSG00000113161.15	HMGCR	0.0304535	8	3	0.05144	Cells_Cultured_fibroblasts	0.263	Artery_Aorta	4.62875	4.92393e-34	0.611129	-1.94779	1.49314	-0.269525	1.78869	3
ENSG00000127083.7	OMD	0.0304609	48	3	0.00359144	Kidney_Cortex	0.967346	Artery_Tibial	28.8716	6.62786e-16	1.21753	-2.91198	2.90022	-1.66958	1.28196	3
ENSG00000147724.11	FAM135B	0.03047	24	4	0.011116	Artery_Coronary	0.6478	Colon_Sigmoid	13.7338	3.50117e-17	0.596059	-2.53903	0.850585	-1.36482	0.768875	4
ENSG00000239482.6	RP11-90K6.1	0.0304911	3	3	0.1007	Pituitary	0.7206	Testis	1.92183	0.152006	0.152006	0.357657	1.64147	1.03399	0.644669	3
ENSG00000181467.4	RAP2B	0.0305054	13	5	0.008084	Artery_Aorta	0.9612	Esophagus_Mucosa	8.02431	5.94032e-17	0.845668	-2.64854	0.388022	-2.02623	1.05092	5
ENSG00000224652.1	LINC00885	0.030506	8	6	0.008992	Skin_Not_Sun_Exposed_Suprapubic	0.3566	Breast_Mammary_Tissue	3.88132	6.84927e-17	0.154128	-2.61236	-0.921863	-1.66691	0.683861	6
ENSG00000253438.2	PCAT1	0.0305142	23	4	0.00389273	Adipose_Visceral_Omentum	0.608592	Cells_Cultured_fibroblasts	14.5042	1.74419e-18	0.929234	-1.21912	2.88673	0.0254005	1.20011	4
ENSG00000136888.6	ATP6V1G1	0.0305549	38	8	0.0105662	Brain_Cerebellar_Hemisphere	0.94454	Skin_Sun_Exposed_Lower_leg	14.676	5.34211e-16	0.617835	-1.09687	2.55673	1.39845	0.945921	8
ENSG00000187012.10	LINC00207	0.0305622	3	2	0.03315	Testis	0.1306	Brain_Caudate_basal_ganglia	2.00107	1.57057e-16	0.998933	-2.13026	1.51174	-0.916261	2.10271	2
ENSG00000272040.1	CTC-366B18.4	0.0305841	47	4	0.01936	Esophagus_Mucosa	0.975	Nerve_Tibial	36.4826	3.28287e-15	1.94228	-1.58866	2.33853	0.84939	0.795402	4
ENSG00000027001.9	MIPEP	0.0306859	48	2	0.00998086	Cells_Cultured_fibroblasts	0.958693	Cells_EBV-transformed_lymphocytes	41.0576	5.84624e-16	6.08758	-2.57649	1.6422	0.492357	1.09166	2
ENSG00000161981.10	SNRNP25	0.0307174	48	3	0.00484331	Brain_Anterior_cingulate_cortex_BA24	0.985875	Thyroid	32.6524	5.42366e-16	1.58751	-2.81727	2.08788	0.422078	1.62079	3
ENSG00000224164.1	RP3-369A17.4	0.0307554	6	4	0.03028	Brain_Hypothalamus	0.8268	Brain_Cortex	4.394	7.59095e-17	0.198415	-0.218808	2.16641	1.29371	1.02834	4
ENSG00000164050.12	PLXNB1	0.0307901	13	2	0.009081	Esophagus_Mucosa	0.5587	Cells_EBV-transformed_lymphocytes	12.1404	2.98372e-19	0.845741	-2.60899	0.60076	-0.265896	0.990208	2
ENSG00000176715.15	ACSF3	0.0308043	48	7	0.00724593	Uterus	0.954891	Lung	27.9518	2.73255e-15	1.09032	-2.68533	2.03194	-0.315288	1.15947	7
ENSG00000249574.1	AC226118.1	0.030805	12	4	0.010227	Adipose_Subcutaneous	0.5116	Esophagus_Muscularis	9.56792	6.27433e-18	0.495309	-1.10087	2.56806	0.898389	0.804333	4
ENSG00000115183.14	TANC1	0.030835	48	10	0.0195173	Lung	0.8849	Brain_Hippocampus	11.9431	3.60462e-16	0.41536	-2.23566	2.3355	-0.026112	1.41652	10
ENSG00000283297.1	RP4-816N1.8	0.0308822	46	5	0.0223777	Artery_Aorta	0.925752	Brain_Putamen_basal_ganglia	25.1608	4.87413e-16	0.94339	-2.2839	1.84457	-0.438266	1.2137	5
ENSG00000186283.13	TOR3A	0.0308987	47	4	0.00486276	Brain_Substantia_nigra	0.914289	Brain_Cerebellar_Hemisphere	31.4953	3.02357e-15	2.80573	-2.81599	2.20964	-1.32122	0.951072	4
ENSG00000163534.14	FCRL1	0.0309076	8	3	0.09226	Stomach	0.8615	Spleen	5.87405	1.0788e-17	0.657849	-1.41616	1.68359	0.408053	1.19082	3
ENSG00000159263.15	SIM2	0.0309289	25	8	0.004197	Artery_Coronary	0.707	Testis	13.3195	1.05183e-17	0.684453	-1.51665	2.86296	0.586663	1.52901	8
ENSG00000178084.1	HTR3C	0.0309606	4	2	0.05224	Thyroid	0.9645	Colon_Transverse	3.55008	1.03495e-16	0.449916	-0.0445073	1.94115	0.507098	0.957598	2
ENSG00000104765.15	BNIP3L	0.0309848	46	4	0.00504981	Esophagus_Mucosa	0.467665	Brain_Hippocampus	24.1864	5.7521e-16	1.83929	-2.12639	2.80384	0.635048	1.60894	4
ENSG00000101265.15	RASSF2	0.0310262	27	9	0.002851	Heart_Atrial_Appendage	0.977634	Artery_Tibial	12.654	8.04717e-17	0.556247	-2.98336	2.22368	0.0875528	1.51809	9
ENSG00000185585.19	OLFML2A	0.0311025	22	6	0.004201	Brain_Substantia_nigra	0.861668	Heart_Left_Ventricle	8.90388	5.90552e-18	0.416965	-1.75115	2.86266	-0.171381	1.27473	6
ENSG00000106460.18	TMEM106B	0.031202	43	5	0.0114892	Adipose_Visceral_Omentum	0.9857	Brain_Amygdala	26.9647	1.85192e-15	1.56932	-2.52746	1.93492	-0.0632699	1.13256	5
ENSG00000185379.20	RAD51D	0.0312172	15	6	0.01503	Brain_Nucleus_accumbens_basal_ganglia	0.9139	Adrenal_Gland	5.91466	9.07475e-18	0.529712	-0.863614	2.43166	0.511632	0.921928	6
ENSG00000171611.9	PTCRA	0.03126	8	1	0.03126	Artery_Aorta	0.03126	Small_Intestine_Terminal_Ileum	8	3.73111e-17	8	-2.15375	2.15375	1.07687	1.99398	1
ENSG00000100804.18	PSMB5	0.03127	49	4	0.0021277	Skin_Not_Sun_Exposed_Suprapubic	0.5328	Ovary	35.7737	9.34799e-16	1.67525	-0.623738	3.0718	2.32322	0.659245	4
ENSG00000065485.19	PDIA5	0.0312766	24	6	0.00672	Brain_Caudate_basal_ganglia	0.7436	Pancreas	12.7469	7.38554e-18	0.800381	-2.71041	2.71041	-0.598862	2.098	6
ENSG00000145740.18	SLC30A5	0.0312835	42	3	0.008163	Brain_Cerebellar_Hemisphere	0.8301	Ovary	26.6384	9.48283e-16	4.33542	-2.64525	-0.214573	-1.15483	1.03003	3
ENSG00000184863.10	RBM33	0.0313625	26	2	0.01054	Heart_Atrial_Appendage	0.3588	Brain_Caudate_basal_ganglia	21.8222	3.71762e-16	3.74516	-2.55759	0.939255	0.0756107	1.05463	2
ENSG00000227192.1	RP1-45I4.3	0.0313922	28	2	0.2063	Brain_Hippocampus	0.826424	Skin_Not_Sun_Exposed_Suprapubic	26.9133	6.41345e-16	0.926553	-0.582544	1.26381	-0.313153	0.524167	2
ENSG00000149596.6	JPH2	0.0314154	43	9	0.04268	Brain_Frontal_Cortex_BA9	0.922921	Cells_Cultured_fibroblasts	17.6802	1.67017e-15	0.628635	-2.02683	1.88619	-0.469518	0.941364	9
ENSG00000166411.13	IDH3A	0.0314311	49	7	0.0355337	Nerve_Tibial	0.957182	Vagina	16.4944	5.36861e-16	0.952202	-2.10222	1.1266	-0.473642	1.00836	7
ENSG00000196502.11	SULT1A1	0.0316995	23	6	0.03151	Lung	0.8778	Breast_Mammary_Tissue	12.0928	2.65401e-17	0.452745	-0.153759	2.15057	0.676482	0.714185	6
ENSG00000185920.15	PTCH1	0.0317412	31	3	0.0195317	Esophagus_Mucosa	0.8787	Adipose_Subcutaneous	24.1022	5.01618e-16	0.995513	-2.33522	1.74797	-0.698903	0.965365	3
ENSG00000272933.1	RP11-47A8.5	0.0318209	20	3	0.1268	Brain_Cerebellar_Hemisphere	0.6603	Stomach	14.1158	1.30261e-18	0.685781	-1.52684	0.713236	-0.592778	0.671767	3
ENSG00000183044.11	ABAT	0.03189	43	7	0.0133511	Skin_Sun_Exposed_Lower_leg	0.951018	Brain_Substantia_nigra	22.3534	1.93506e-15	0.972917	-2.47426	1.63672	-0.382214	1.09277	7
ENSG00000086730.16	LAT2	0.0319525	9	6	0.007848	Heart_Left_Ventricle	0.2426	Esophagus_Muscularis	3.93472	5.24865e-17	0.132067	-2.65854	-1.16851	-1.76859	0.578311	6
ENSG00000274220.1	RP11-77K12.9	0.0320025	6	1	0.02541	Brain_Cerebellar_Hemisphere	0.04166	Brain_Caudate_basal_ganglia	5.95324	1.96765e-19	5.95324	-2.23511	-2.0369	-2.13601	0.108565	1
ENSG00000265799.1	RP11-387H17.6	0.0321419	5	3	0.0246	Testis	0.3452	Muscle_Skeletal	3.16126	1.45071e-16	0.649994	-2.24763	2.22876	1.05279	1.92278	3
ENSG00000227169.2	RP1-37J18.1	0.03219	1	1	0.03219	Testis	0.03219	Testis	1	1	1	2.14204	2.14204	2.14204	NA	1
ENSG00000070526.14	ST6GALNAC1	0.0322695	46	4	0.00399194	Esophagus_Mucosa	0.9891	Colon_Transverse	26.2303	7.66194e-16	2.45148	-2.84594	2.8788	-0.584774	1.36708	4
ENSG00000179981.9	TSHZ1	0.0322718	32	6	0.002154	Brain_Frontal_Cortex_BA9	0.9749	Liver	19.9241	8.28788e-16	0.80084	-0.388833	3.06813	2.14022	1.08938	6
ENSG00000267547.1	RP11-686D22.4	0.0322807	46	4	0.0136052	Thyroid	0.9699	Pituitary	35.1089	8.42302e-16	1.21808	-1.00819	2.46752	0.221933	0.952034	4
ENSG00000100461.17	RBM23	0.0323351	45	4	0.00835117	Adipose_Visceral_Omentum	0.744307	Esophagus_Mucosa	36.0233	1.60674e-15	1.48954	-2.63753	1.6267	1.02505	1.09578	4
ENSG00000180354.15	MTURN	0.0323433	36	5	0.01795	Nerve_Tibial	0.983334	Cells_Cultured_fibroblasts	23.8134	5.39218e-16	1.09819	-2.36665	2.04627	-0.147	1.2777	5
ENSG00000270170.1	NCBP2-AS2	0.0323528	45	3	0.0267422	Muscle_Skeletal	0.965887	Ovary	34.0662	8.09804e-16	2.89839	-1.0388	2.21526	0.549534	1.13782	3
ENSG00000091651.8	ORC6	0.032445	45	2	0.008931	Thyroid	0.0694111	Brain_Cerebellum	41.3494	6.8638e-16	3.65058	-2.61468	2.61468	-0.145576	2.31396	2
ENSG00000276644.4	DACH1	0.0324459	6	5	0.0219	Artery_Coronary	0.6954	Brain_Spinal_cord_cervical_c-1	2.18806	1.96262e-16	0.584888	-2.22309	2.2921	-0.0159329	1.96452	5
ENSG00000251567.5	RP11-775H9.2	0.03249	1	1	0.03249	Testis	0.03249	Testis	1	1	1	-2.13833	-2.13833	-2.13833	NA	1
ENSG00000117500.12	TMED5	0.0325557	47	2	0.00334307	Artery_Tibial	0.6806	Brain_Substantia_nigra	41.5114	5.49615e-16	3.14624	-2.93429	-0.411645	-2.40895	0.394817	2
ENSG00000164366.3	CCDC127	0.0325695	48	4	0.00247712	Colon_Transverse	0.935476	Colon_Sigmoid	28.1446	2.66021e-15	0.962585	-3.02612	2.43626	-0.973651	1.29309	4
ENSG00000145907.14	G3BP1	0.0325901	47	3	0.00625956	Adipose_Visceral_Omentum	0.5183	Prostate	32.2802	7.32526e-16	1.74323	-2.73387	1.64195	-1.85433	0.643764	3
ENSG00000082269.16	FAM135A	0.0325936	47	2	0.00740557	Adipose_Visceral_Omentum	0.903336	Brain_Cortex	30.5435	7.66914e-16	15.8618	-2.67803	2.43675	-0.430982	1.50122	2
ENSG00000213699.8	SLC35F6	0.0326209	29	2	0.00550571	Adipose_Subcutaneous	0.402	Brain_Nucleus_accumbens_basal_ganglia	22.7809	7.17203e-16	5.80413	-2.50573	2.77585	1.78284	1.51564	2
ENSG00000164169.12	PRMT9	0.0326651	2	2	0.07536	Thyroid	0.4439	Brain_Cerebellum	1.50232	0.497675	0.497675	-1.77827	0.765624	-0.506321	1.7988	2
ENSG00000134375.10	TIMM17A	0.0326706	46	7	0.00560892	Cells_Cultured_fibroblasts	0.670464	Nerve_Tibial	23.8693	5.60998e-16	0.821841	-2.76981	2.36166	-0.889078	1.58173	7
ENSG00000164081.12	TEX264	0.0326983	45	2	0.0001876	Brain_Hypothalamus	0.2472	Artery_Aorta	39.1599	6.96636e-16	3.17825	-3.73515	-1.15718	-2.44476	0.588379	2
ENSG00000189366.9	ALG1L	0.0327298	41	3	0.02315	Brain_Hippocampus	0.824224	Stomach	31.1631	3.06083e-15	1.64679	-2.27095	1.68639	-1.08859	0.991672	3
ENSG00000127463.13	EMC1	0.0328081	47	3	0.007823	Kidney_Cortex	0.931457	Pituitary	36.5593	5.24878e-16	2.44095	-2.65962	0.280449	-1.23708	0.731832	3
ENSG00000159259.7	CHAF1B	0.0328292	49	3	0.0199207	Cells_EBV-transformed_lymphocytes	0.91677	Brain_Cerebellum	30.423	1.22368e-15	6.71251	-2.29244	2.32784	0.686398	1.5059	3
ENSG00000101336.13	HCK	0.0328358	20	4	0.002519	Esophagus_Mucosa	0.6279	Colon_Sigmoid	15.236	4.15106e-18	0.509079	-3.02105	1.30704	0.402311	0.96514	4
ENSG00000175646.3	PRM1	0.0328505	17	3	0.00368511	Testis	0.7853	Muscle_Skeletal	13.8628	6.48377e-21	0.660298	-2.4946	2.90393	-1.56755	1.68539	3
ENSG00000159214.12	CCDC24	0.0328813	46	2	0.00474566	Brain_Hippocampus	0.817896	Liver	35.1185	6.68245e-16	8.13717	-2.62427	2.82381	1.15248	1.77658	2
ENSG00000177963.14	RIC8A	0.0329507	49	4	0.007424	Minor_Salivary_Gland	0.968283	Breast_Mammary_Tissue	36.9483	4.64131e-16	1.24977	-2.6772	2.6772	-0.294309	1.0353	4
ENSG00000137558.7	PI15	0.0329798	26	6	0.00964354	Adrenal_Gland	0.8289	Brain_Hypothalamus	10.7587	3.34537e-16	0.378972	-2.58836	0.241458	-1.79436	0.851538	6
ENSG00000204348.9	DXO	0.0330225	28	8	0.04342	Stomach	0.8414	Adrenal_Gland	10.0385	7.22569e-16	0.366494	-2.01965	1.15024	-0.320005	1.12203	8
ENSG00000129219.13	PLD2	0.0330533	21	7	0.005272	Lung	0.879195	Thyroid	9.52832	1.34557e-17	0.405723	-0.883437	2.78993	0.91834	1.1906	7
ENSG00000169972.11	PUSL1	0.0330774	35	4	0.04662	Lung	0.930829	Liver	28.7397	4.07189e-16	1.37086	-1.98974	1.52926	0.697382	0.869174	4
ENSG00000132793.11	LPIN3	0.0331906	45	3	0.03454	Brain_Cerebellar_Hemisphere	0.8492	Spleen	35.5034	1.01856e-15	2.41634	-1.92014	2.11371	-0.353322	1.11862	3
ENSG00000227115.7	LINC01630	0.0332561	14	4	0.003782	Brain_Substantia_nigra	0.907	Brain_Anterior_cingulate_cortex_BA24	9.40985	1.10637e-18	0.402005	-2.89579	-0.116823	-1.83585	0.949979	4
ENSG00000196954.13	CASP4	0.0332724	38	4	0.0117337	Nerve_Tibial	0.673573	Muscle_Skeletal	26.5865	9.21194e-16	1.19675	-2.52005	1.2916	-0.36807	1.10816	4
ENSG00000272282.1	LINC02084	0.0333352	41	2	0.001995	Esophagus_Mucosa	0.9228	Brain_Caudate_basal_ganglia	34.5568	1.36863e-15	4.90527	-3.09098	2.12369	-2.10308	0.994141	2
ENSG00000157303.10	SUSD3	0.0333553	17	5	0.01074	Heart_Atrial_Appendage	0.9207	Breast_Mammary_Tissue	10.3775	1.20735e-17	0.3571	-2.55105	1.11325	-0.286825	1.01323	5
ENSG00000138433.15	CIR1	0.0334346	25	3	0.003371	Adipose_Subcutaneous	0.9403	Brain_Putamen_basal_ganglia	19.0334	1.76517e-17	1.8381	-0.0748928	2.93171	2.34773	0.823878	3
ENSG00000233276.3	GPX1	0.0334505	40	2	0.0078773	Small_Intestine_Terminal_Ileum	0.9946	Brain_Hippocampus	29.7102	2.10951e-15	10.0874	-0.0912424	2.65728	1.61386	1.02241	2
ENSG00000095787.21	WAC	0.0334528	47	2	0.01216	Adrenal_Gland	0.905672	Pancreas	40.2103	1.12633e-15	5.63093	-2.50747	-0.118499	-1.7512	0.730775	2
ENSG00000203740.3	METTL11B	0.0334642	5	3	0.199539	Heart_Left_Ventricle	0.525779	Brain_Caudate_basal_ganglia	3.61415	6.5956e-17	0.171958	-1.28287	0.754082	0.0405581	0.949862	3
ENSG00000008382.15	MPND	0.0335388	36	6	0.0305362	Muscle_Skeletal	0.993686	Nerve_Tibial	14.6028	5.07799e-16	0.964626	-1.96323	2.16307	-0.353542	1.13694	6
ENSG00000083814.13	ZNF671	0.0335575	24	2	0.01651	Skin_Sun_Exposed_Lower_leg	0.1848	Kidney_Cortex	21.978	2.37942e-17	1.12429	-2.39744	1.47953	-1.97989	1.04267	2
ENSG00000153975.9	ZUFSP	0.033618	38	3	0.0946215	Lung	0.932915	Testis	32.8494	8.16993e-16	1.33527	-1.3	1.67151	0.0436241	0.655929	3
ENSG00000143322.19	ABL2	0.0336433	47	5	0.000227132	Brain_Spinal_cord_cervical_c-1	0.535866	Whole_Blood	25.8619	7.10091e-16	1.00883	-3.68675	2.64448	-1.16957	1.95191	5
ENSG00000090470.14	PDCD7	0.0337005	7	4	0.02545	Brain_Cerebellum	0.6446	Cells_Cultured_fibroblasts	3.01765	1.84009e-17	0.751907	-0.973309	2.2345	0.148322	1.51832	4
ENSG00000172493.20	AFF1	0.0337068	23	8	0.002869	Artery_Tibial	0.864422	Esophagus_Muscularis	10.2325	1.22508e-17	0.431562	-1.46728	2.98144	0.404484	1.47444	8
ENSG00000093144.18	ECHDC1	0.0337429	33	6	0.04273	Brain_Caudate_basal_ganglia	0.833	Adipose_Visceral_Omentum	22.6396	7.24869e-16	1.00641	-1.66647	2.02634	-0.104682	0.856607	6
ENSG00000163283.6	ALPP	0.0337572	2	2	0.0329	Lung	0.728307	Testis	1.45866	0.541342	0.541342	-2.1333	0.347379	-0.892961	1.75411	2
ENSG00000240505.8	TNFRSF13B	0.0337766	5	4	0.039	Brain_Putamen_basal_ganglia	0.7403	Breast_Mammary_Tissue	2.29048	1.74238e-17	0.434373	-1.00147	2.06419	1.05951	1.36054	4
ENSG00000140650.11	PMM2	0.0337974	46	7	0.002652	Brain_Caudate_basal_ganglia	0.7995	Adrenal_Gland	19.4804	5.03759e-16	0.755053	-1.26019	3.00544	1.27952	1.08525	7
ENSG00000059122.16	FLYWCH1	0.0338148	49	1	0.0205102	Brain_Hippocampus	0.117876	Adipose_Visceral_Omentum	46.5438	4.49345e-16	46.5438	-2.31688	-1.56375	-2.06809	0.210966	1
ENSG00000226741.1	CTA-929C8.6	0.0338687	1	1	0.0338687	Testis	0.0338687	Testis	1	1	1	2.12163	2.12163	2.12163	NA	1
ENSG00000117594.9	HSD11B1	0.0338899	30	3	0.04034	Colon_Transverse	0.1243	Adipose_Visceral_Omentum	28.0028	2.68891e-15	0.956847	-2.05025	1.53697	-1.45438	0.572798	3
ENSG00000137571.10	SLCO5A1	0.0339707	38	3	0.006664	Artery_Tibial	0.8962	Adipose_Visceral_Omentum	29.1169	1.10831e-15	1.86447	-2.71318	0.532409	-0.172152	0.665566	3
ENSG00000180044.5	C3orf80	0.0340051	19	6	0.0518836	Brain_Cerebellar_Hemisphere	0.557742	Prostate	12.9824	5.30826e-17	0.506356	-1.9441	1.66017	-1.19884	1.13909	6
ENSG00000087510.6	TFAP2C	0.0340201	42	9	0.00241675	Colon_Sigmoid	0.866466	Brain_Spinal_cord_cervical_c-1	14.0657	4.88432e-16	0.483071	-3.03357	2.24591	-0.0184711	1.49367	9
ENSG00000259656.1	RP11-325E5.1	0.0340945	33	2	0.0100048	Pituitary	0.1609	Brain_Caudate_basal_ganglia	30.6335	3.0122e-15	2.33074	1.40205	2.57566	1.59032	0.41582	2
ENSG00000012223.12	LTF	0.0342332	37	3	0.004949	Breast_Mammary_Tissue	0.9664	Skin_Sun_Exposed_Lower_leg	29.2025	2.58617e-15	1.83901	-2.81033	1.53493	-0.15521	1.02619	3
ENSG00000132768.13	DPH2	0.034255	15	4	0.002594	Lung	0.891097	Minor_Salivary_Gland	12.4226	6.92602e-18	0.671661	-0.136916	3.01216	2.36044	0.748417	4
ENSG00000184032.2	KRTAP20-2	0.03429	1	1	0.03429	Testis	0.03429	Testis	1	1	1	2.11664	2.11664	2.11664	NA	1
ENSG00000229483.2	LINC00362	0.03436	1	1	0.03436	Testis	0.03436	Testis	1	1	1	-2.11582	-2.11582	-2.11582	NA	1
ENSG00000130649.9	CYP2E1	0.0343674	43	3	0.00325449	Cells_EBV-transformed_lymphocytes	0.886212	Brain_Caudate_basal_ganglia	20.1108	4.00904e-16	7.45783	-2.24716	2.94262	0.74522	1.55517	3
ENSG00000120686.11	UFM1	0.0344154	33	1	0.01719	Brain_Cerebellar_Hemisphere	0.216512	Heart_Left_Ventricle	31.6359	3.11071e-15	31.6359	1.23586	2.38262	2.08004	0.41064	1
ENSG00000160014.16	CALM3	0.0344574	33	5	0.00661209	Thyroid	0.9626	Adrenal_Gland	19.984	1.91244e-15	1.16723	-0.860162	2.71577	0.819868	0.920834	5
ENSG00000107796.13	ACTA2	0.0345302	42	4	0.009587	Ovary	0.852326	Heart_Atrial_Appendage	22.1881	7.33694e-16	0.867768	-2.59038	2.59038	0.236939	1.29077	4
ENSG00000230939.1	RP11-314C16.1	0.0346072	37	5	0.06014	Artery_Aorta	0.979469	Testis	22.7297	2.20048e-15	0.962977	-1.62576	1.87977	0.443755	1.16473	5
ENSG00000116747.12	TROVE2	0.0346345	35	3	0.0234	Adipose_Subcutaneous	0.564357	Thyroid	20.0624	3.68534e-16	5.89428	-2.26684	0.868088	-1.64091	1.139	3
ENSG00000173465.7	SSSCA1	0.034694	19	4	0.01039	Minor_Salivary_Gland	0.894931	Testis	15.1434	1.70479e-17	0.597966	-2.56257	2.56257	0.18281	1.08958	4
ENSG00000177119.15	ANO6	0.0347064	37	1	0.00660188	Lung	0.5945	Skin_Not_Sun_Exposed_Suprapubic	35.5318	3.28323e-15	35.5318	0.532326	2.71629	2.09834	0.282154	1
ENSG00000243509.4	TNFRSF6B	0.0347174	44	8	0.02975	Whole_Blood	0.878231	Muscle_Skeletal	17.3752	6.94532e-16	0.607275	-2.1734	1.78779	0.108857	0.937779	8
ENSG00000186298.11	PPP1CC	0.0347384	47	1	0.0241377	Artery_Aorta	0.1393	Adipose_Subcutaneous	45.9059	4.34091e-15	45.9059	-2.25493	-1.4784	-2.09653	0.0946233	1
ENSG00000196267.12	ZNF836	0.0347656	30	6	0.001538	Brain_Cerebellum	0.9851	Ovary	20.6329	8.11712e-16	0.77516	-3.16742	3.16742	0.298257	1.24871	6
ENSG00000254153.1	CTA-398F10.2	0.0348431	13	3	0.017858	Skin_Sun_Exposed_Lower_leg	0.836286	Thyroid	8.47383	1.9488e-17	0.967918	-1.41115	2.36855	1.53892	1.06461	3
ENSG00000151365.2	THRSP	0.0348791	36	3	0.007171	Esophagus_Muscularis	0.5396	Adrenal_Gland	22.4383	8.63565e-16	3.4101	-2.6888	2.6888	0.533252	1.2864	3
ENSG00000198523.5	PLN	0.034954	47	3	0.00471264	Heart_Atrial_Appendage	0.835593	Brain_Caudate_basal_ganglia	31.5384	9.48504e-16	2.25484	-2.82605	2.21441	-0.777693	1.38514	3
ENSG00000137434.11	C6orf52	0.03502	7	1	0.03502	Cells_Cultured_fibroblasts	0.03502	Nerve_Tibial	7	1.36104e-48	7	-2.10813	-2.10813	-2.10813	1.81299e-16	1
ENSG00000251388.1	RP11-427M20.1	0.03506	2	1	0.03506	Thyroid	0.03506	Prostate	2	0	2	-2.10766	-2.10766	-2.10766	6.28037e-16	1
ENSG00000127124.14	HIVEP3	0.0350898	37	4	0.0008031	Liver	0.9753	Esophagus_Mucosa	22.3471	8.92838e-16	0.795646	-1.80746	3.35172	0.945982	1.47641	4
ENSG00000107165.12	TYRP1	0.0350993	29	3	0.00513085	Cells_Cultured_fibroblasts	0.943349	Brain_Anterior_cingulate_cortex_BA24	22.5792	3.66355e-16	1.60185	-2.75036	2.7987	0.136228	1.83602	3
ENSG00000204852.15	TCTN1	0.0351101	22	3	0.004349	Esophagus_Gastroesophageal_Junction	0.816582	Muscle_Skeletal	18.7129	1.4761e-18	0.898503	-2.85167	0.584625	0.171026	1.0206	3
ENSG00000251189.1	CTD-2196P11.2	0.0352866	13	5	0.001741	Artery_Tibial	0.8391	Adipose_Subcutaneous	6.90559	7.10235e-19	0.309095	-0.203045	3.13119	0.919319	1.20666	5
ENSG00000099331.13	MYO9B	0.0352934	40	6	0.00973113	Cells_Cultured_fibroblasts	0.9808	Adrenal_Gland	19.6728	4.73524e-16	0.961112	-1.44201	2.58524	-0.0678611	1.09566	6
ENSG00000270607.1	RP11-359E10.1	0.0352971	31	4	0.0901	Adipose_Subcutaneous	0.846387	Brain_Cortex	22.438	2.88598e-16	1.2566	-1.44628	1.69487	-0.522413	0.923153	4
ENSG00000166123.13	GPT2	0.0354047	12	5	0.01284	Breast_Mammary_Tissue	0.8697	Adipose_Subcutaneous	5.17536	7.07322e-18	0.674651	-2.48818	2.48818	0.0514025	1.40661	5
ENSG00000179010.14	MRFAP1	0.0354193	40	2	0.107425	Brain_Putamen_basal_ganglia	0.905405	Artery_Tibial	34.0028	1.41649e-15	3.91439	-1.60988	1.48933	-0.598419	0.94952	2
ENSG00000007545.15	CRAMP1	0.0355334	14	2	0.03703	Esophagus_Mucosa	0.4018	Pituitary	13.3778	1.41956e-17	0.540076	-2.08543	-0.838411	-1.68085	0.566251	2
ENSG00000243832.1	LINC02000	0.0356651	2	2	0.01024	Small_Intestine_Terminal_Ileum	0.04626	Colon_Transverse	1.70033	0.299674	0.299674	1.99301	2.56762	2.28032	0.406307	2
ENSG00000254927.1	RP11-98J9.2	0.0357473	1	1	0.0357473	Testis	0.0357473	Testis	1	1	1	2.09979	2.09979	2.09979	NA	1
ENSG00000137393.9	RNF144B	0.0357724	45	10	0.0009318	Pancreas	0.999213	Brain_Cortex	10.5912	5.49992e-16	0.537731	-3.31035	1.88626	-0.64398	1.32291	10
ENSG00000135077.8	HAVCR2	0.0357868	43	3	0.00973	Cells_EBV-transformed_lymphocytes	0.79792	Colon_Transverse	33.3721	4.34004e-16	1.27489	-2.58528	2.58528	0.951545	2.11988	3
ENSG00000198610.10	AKR1C4	0.0358125	6	3	0.00973	Small_Intestine_Terminal_Ileum	0.487542	Lung	4.27028	7.75208e-18	0.664726	0.694223	2.58528	2.20197	0.756526	3
ENSG00000184985.16	SORCS2	0.0358291	40	9	0.009911	Brain_Hippocampus	0.996346	Skin_Not_Sun_Exposed_Suprapubic	14.9333	4.27732e-16	0.606625	-2.57892	1.51929	0.104326	1.06302	9
ENSG00000245662.2	LINC02211	0.03586	1	1	0.03586	Testis	0.03586	Testis	1	1	1	2.09851	2.09851	2.09851	NA	1
ENSG00000100336.17	APOL4	0.0358673	48	4	0.01475	Brain_Substantia_nigra	0.994173	Liver	34.5514	3.39047e-15	2.11798	-1.05143	2.43846	0.727143	0.914312	4
ENSG00000250313.2	RP11-5P22.3	0.03587	1	1	0.03587	Testis	0.03587	Testis	1	1	1	-2.0984	-2.0984	-2.0984	NA	1
ENSG00000185043.10	CIB1	0.035904	49	3	0.01415	Vagina	0.941736	Brain_Amygdala	36.9941	1.15831e-15	3.54347	-2.06424	2.45343	0.779819	1.01039	3
ENSG00000164543.5	STK17A	0.0359184	32	4	0.0258921	Brain_Cerebellar_Hemisphere	0.6328	Muscle_Skeletal	22.3249	5.55921e-16	0.993228	-1.25632	2.22783	0.458982	1.10932	4
ENSG00000276600.4	RAB7B	0.03595	5	2	0.008011	Muscle_Skeletal	0.4586	Brain_Amygdala	3.97575	3.15231e-16	0.999979	-2.65161	-0.741154	-2.12254	0.779468	2
ENSG00000284413.1	BTBD8	0.035996	47	2	0.0170852	Colon_Sigmoid	0.211	Cells_Cultured_fibroblasts	45.1138	2.04198e-15	1.76484	1.25082	2.38487	1.80994	0.118245	2
ENSG00000116785.13	CFHR3	0.0360328	10	2	0.0245	Lung	0.9717	Breast_Mammary_Tissue	8.70069	6.88701e-17	1.25801	0.0354762	2.2492	1.4378	0.885534	2
ENSG00000249853.7	HS3ST5	0.0360373	7	4	0.03631	Muscle_Skeletal	0.8526	Brain_Amygdala	3.15908	6.53773e-19	0.227662	-0.563639	2.09344	0.0360177	0.97194	4
ENSG00000166246.13	C16orf71	0.036059	27	4	0.01462	Kidney_Cortex	0.8847	Esophagus_Mucosa	22.5105	2.96866e-16	0.823524	-2.44166	1.68863	1.03186	1.21483	4
ENSG00000230724.9	LINC01001	0.0360968	4	4	0.02043	Nerve_Tibial	0.6833	Colon_Sigmoid	1.92461	0.151482	0.151482	0.407964	2.31836	1.53923	0.828297	4
ENSG00000106952.7	TNFSF8	0.0361032	5	5	0.04241	Brain_Amygdala	0.4783	Adipose_Visceral_Omentum	1.79347	0.422721	0.422721	-2.02947	1.66969	-0.121233	1.64188	5
ENSG00000147852.15	VLDLR	0.0361278	40	15	0.00608277	Muscle_Skeletal	0.989223	Lung	10.477	9.2622e-16	0.4424	-2.18936	2.74329	-0.34692	1.43635	15
ENSG00000227740.1	RP11-318C24.2	0.0361926	27	6	0.00649829	Vagina	0.812642	Esophagus_Mucosa	13.0377	2.37012e-16	0.692685	-2.72152	0.639035	-1.23774	0.891385	6
ENSG00000105255.10	FSD1	0.0361982	25	6	0.007234	Brain_Frontal_Cortex_BA9	0.97838	Cells_Cultured_fibroblasts	18.2936	1.12057e-17	0.81169	-1.96099	2.68588	0.0350893	0.901298	6
ENSG00000133597.10	ADCK2	0.0362275	46	3	0.00247408	Pancreas	0.9364	Skin_Not_Sun_Exposed_Suprapubic	33.4343	8.24459e-16	1.26343	-3.02649	1.78365	-1.03638	1.08411	3
ENSG00000223586.5	LINC01312	0.0363006	3	3	0.03234	Pituitary	0.7247	Kidney_Cortex	1.63358	0.5468	0.5468	-2.14018	0.93362	-0.284793	1.6329	3
ENSG00000196074.12	SYCP2	0.0363204	37	1	0.03614	Adrenal_Gland	0.714515	Kidney_Cortex	36.0138	6.53523e-16	36.0138	-2.09535	2.09535	1.68905	1.20917	1
ENSG00000155393.12	HEATR3	0.0363947	49	1	0.0192821	Spleen	0.0865852	Brain_Cortex	47.3637	1.20189e-15	47.3637	-2.34003	-1.71369	-2.05601	0.189612	1
ENSG00000146426.17	TIAM2	0.0364158	17	12	0.0411	Muscle_Skeletal	0.966	Artery_Tibial	3.23457	2.47789e-17	0.298342	-1.82501	2.04252	0.105658	1.29431	12
ENSG00000157106.16	SMG1	0.0365609	47	3	0.00456163	Thyroid	0.3226	Liver	33.711	6.87714e-16	2.43926	0.989129	2.83646	2.1618	0.561845	3
ENSG00000161970.12	RPL26	0.0367471	23	2	0.00719916	Cells_Cultured_fibroblasts	0.7482	Brain_Cerebellum	20.3655	8.54703e-18	2.08743	-2.68749	0.321014	-2.30761	0.753489	2
ENSG00000183844.16	FAM3B	0.0368205	37	7	0.0009577	Brain_Frontal_Cortex_BA9	0.903346	Pancreas	22.665	2.21515e-15	0.766751	-0.969203	3.30267	0.690492	0.72299	7
ENSG00000205015.1	LINC02138	0.0368214	6	3	0.00244806	Brain_Cerebellar_Hemisphere	0.9374	Brain_Hippocampus	2.91352	4.18439e-17	0.992049	-3.02969	1.44307	-0.685339	1.935	3
ENSG00000167552.13	TUBA1A	0.0368369	28	2	0.02637	Whole_Blood	0.2029	Adrenal_Gland	26.9425	9.05637e-16	1.00148	-2.14379	2.22072	1.09418	0.820141	2
ENSG00000080644.15	CHRNA3	0.0368461	19	4	0.004807	Esophagus_Gastroesophageal_Junction	0.9223	Brain_Caudate_basal_ganglia	10.4905	2.44991e-18	0.507211	-1.66612	2.81969	1.25837	1.29207	4
ENSG00000228216.1	RP11-367F23.1	0.036849	13	2	0.1903	Artery_Aorta	0.9362	Brain_Cerebellar_Hemisphere	12.2884	1.10631e-17	0.675489	-1.30969	-0.0800468	-0.823084	0.586826	2
ENSG00000253702.1	RP11-567J20.1	0.03685	1	1	0.03685	Cells_Cultured_fibroblasts	0.03685	Cells_Cultured_fibroblasts	1	1	1	2.08742	2.08742	2.08742	NA	1
ENSG00000259841.6	LINC01566	0.0369	1	1	0.0369	Testis	0.0369	Testis	1	1	1	2.08687	2.08687	2.08687	NA	1
ENSG00000008441.16	NFIX	0.0369013	48	4	0.00869656	Thyroid	0.830123	Muscle_Skeletal	37.3668	1.30804e-15	2.14472	-2.62376	1.98459	0.438619	1.81297	4
ENSG00000151577.12	DRD3	0.0369573	2	2	0.06218	Brain_Caudate_basal_ganglia	0.2926	Brain_Nucleus_accumbens_basal_ganglia	1.32956	0.670441	0.670441	-1.86501	1.05244	-0.406287	2.06295	2
ENSG00000227356.2	LINC00866	0.037	5	1	0.037	Brain_Cerebellar_Hemisphere	0.037	Brain_Nucleus_accumbens_basal_ganglia	5	0	5	-2.08576	-2.08576	-2.08576	3.14018e-16	1
ENSG00000105376.4	ICAM5	0.0370157	47	5	0.000998257	Colon_Sigmoid	0.928	Brain_Amygdala	30.5575	7.03934e-16	1.56937	-3.29102	2.33819	-1.73152	1.60652	5
ENSG00000082175.14	PGR	0.0370338	41	5	0.0165996	Adipose_Subcutaneous	0.793008	Minor_Salivary_Gland	23.1332	1.91334e-15	1.04131	-1.84864	2.39546	0.210134	1.44581	5
ENSG00000105419.17	MEIS3	0.0370624	38	8	0.0213554	Esophagus_Muscularis	0.813013	Artery_Aorta	14.0602	5.29249e-16	0.476926	-1.24563	2.30164	0.328258	1.22261	8
ENSG00000203837.4	PNLIPRP3	0.0371533	11	2	0.01257	Pancreas	0.3488	Skin_Sun_Exposed_Lower_leg	9.20621	1.06317e-17	1.73381	-0.936919	2.49572	1.30102	1.03869	2
ENSG00000170160.17	CCDC144A	0.0371806	3	3	0.03638	Brain_Cerebellum	0.3353	Pancreas	1.33466	0.694652	0.694652	-2.09265	-0.963493	-1.62163	0.587376	3
ENSG00000071991.8	CDH19	0.0372212	18	5	0.0200112	Artery_Tibial	0.6523	Brain_Frontal_Cortex_BA9	9.08863	6.91311e-18	0.884357	-2.27962	2.32614	0.320019	1.63358	5
ENSG00000166927.12	MS4A7	0.0372706	46	4	0.01239	Skin_Not_Sun_Exposed_Suprapubic	0.962511	Whole_Blood	31.4502	5.83003e-16	1.46446	-1.18126	2.50084	0.833268	0.733299	4
ENSG00000117650.12	NEK2	0.0372775	38	4	0.00440309	Brain_Hypothalamus	0.697546	Whole_Blood	25.605	1.07913e-15	0.932952	-1.80759	2.84774	1.56123	1.10721	4
ENSG00000261150.2	EPPK1	0.0372862	31	5	0.01285	Lung	0.4516	Small_Intestine_Terminal_Ileum	21.4985	3.90889e-16	0.94014	-2.4879	-0.75275	-1.78665	0.50096	5
ENSG00000109705.7	NKX3-2	0.0372929	13	5	0.0296937	Cells_Cultured_fibroblasts	0.9505	Kidney_Cortex	5.83087	6.98676e-17	0.266425	-2.17415	1.02217	-0.0971743	0.801889	5
ENSG00000004700.15	RECQL	0.0373496	49	5	0.001092	Brain_Cortex	0.9995	Brain_Caudate_basal_ganglia	29.432	2.87071e-15	2.33853	-3.26568	2.97956	0.949272	1.26994	5
ENSG00000253190.3	AC084082.3	0.03736	2	1	0.03736	Liver	0.03736	Liver	2	0	2	-2.08181	-2.08181	-2.08181	0	1
ENSG00000223573.6	TINCR	0.0373692	39	6	0.00494885	Nerve_Tibial	0.790493	Cells_Cultured_fibroblasts	19.0733	1.42118e-15	0.791746	-1.7855	2.81034	0.574546	0.901018	6
ENSG00000101040.19	ZMYND8	0.0374138	4	3	0.006361	Spleen	0.6545	Brain_Cerebellum	2.29197	0.00889397	0.717518	-2.72857	-0.44752	-1.13305	1.07207	3
ENSG00000143257.11	NR1I3	0.0374274	7	4	0.05203	Brain_Hypothalamus	0.4274	Muscle_Skeletal	3.14514	1.07307e-17	0.98524	-1.93803	1.94289	0.409458	1.55369	4
ENSG00000198040.10	ZNF84	0.0374373	4	4	0.02384	Artery_Tibial	0.5296	Brain_Cerebellum	1.71317	0.634982	0.634982	-1.6973	2.2597	0.251401	1.75862	4
ENSG00000134318.13	ROCK2	0.0375455	47	6	0.00706039	Muscle_Skeletal	0.972027	Testis	30.623	2.92e-15	1.26493	-2.69398	2.09287	0.125667	0.786461	6
ENSG00000267420.1	RP11-527L4.6	0.0375497	4	3	0.04715	Testis	0.7624	Brain_Anterior_cingulate_cortex_BA24	2.80995	2.89565e-17	0.445938	-0.330132	1.98495	0.413704	1.08738	3
ENSG00000087128.9	TMPRSS11E	0.0376486	9	5	0.00963674	Pancreas	0.8981	Esophagus_Mucosa	4.73295	4.81942e-18	0.622706	-2.5886	1.09755	-0.626695	1.43818	5
ENSG00000267731.1	RP11-147L13.8	0.0376747	48	5	0.01241	Brain_Cerebellum	0.797585	Esophagus_Gastroesophageal_Junction	27.5336	2.68e-15	1.16475	-2.50027	1.64195	0.732223	0.809212	5
ENSG00000249685.1	RP11-360F5.3	0.0376853	49	2	0.09067	Esophagus_Muscularis	0.364698	Pancreas	45.493	1.0987e-15	2.33425	-1.42693	1.69187	1.25605	0.60909	2
ENSG00000183770.5	FOXL2	0.0376914	20	5	0.005553	Esophagus_Mucosa	0.9621	Adrenal_Gland	15.4081	2.25624e-18	0.635091	-2.77307	1.58627	-0.0153378	0.744194	5
ENSG00000114279.13	FGF12	0.0376981	7	7	0.003615	Spleen	0.5851	Lung	2.665	0.0916644	0.0916644	-0.647937	2.90994	1.29066	1.20095	7
ENSG00000164970.14	FAM219A	0.037742	45	4	0.0149207	Brain_Putamen_basal_ganglia	0.980329	Skin_Not_Sun_Exposed_Suprapubic	35.7633	1.1195e-15	1.54878	-2.17252	2.4343	-0.143991	1.52738	4
ENSG00000118961.14	LDAH	0.0377582	48	2	0.00365858	Whole_Blood	0.306297	Artery_Tibial	42.9262	1.45347e-15	2.46197	1.02302	2.90619	1.89706	0.443886	2
ENSG00000266821.1	RP11-6N17.2	0.0377594	18	3	0.00786387	Thyroid	0.3005	Cells_EBV-transformed_lymphocytes	12.7637	6.70179e-18	0.879366	-2.65786	-1.03536	-2.0154	0.408387	3
ENSG00000129128.12	SPCS3	0.0377609	41	5	0.00879475	Brain_Nucleus_accumbens_basal_ganglia	0.9965	Colon_Sigmoid	18.127	1.13079e-15	0.818142	-2.61993	2.49705	0.181509	1.40199	5
ENSG00000277352.1	KB-68A7.2	0.03777	1	1	0.03777	Liver	0.03777	Liver	1	1	1	2.07734	2.07734	2.07734	NA	1
ENSG00000233232.6	NPIPB7	0.0378084	23	3	0.07579	Liver	0.9083	Brain_Hypothalamus	20.7918	7.74535e-18	0.7451	-0.242491	1.77565	0.961855	0.578513	3
ENSG00000166825.13	ANPEP	0.0378151	31	6	0.0121849	Artery_Aorta	0.9907	Minor_Salivary_Gland	20.3255	4.62555e-16	0.744054	-1.67312	2.50674	0.988851	1.04073	6
ENSG00000242042.1	LINC01743	0.0378645	1	1	0.0378645	Testis	0.0378645	Testis	1	1	1	2.07632	2.07632	2.07632	NA	1
ENSG00000167210.16	LOXHD1	0.0378749	31	6	0.05936	Kidney_Cortex	0.8872	Adipose_Subcutaneous	17.1294	6.37559e-16	0.588781	-1.88552	1.85871	0.267647	0.956951	6
ENSG00000166855.9	CLPX	0.03788	3	1	0.03788	Cells_Cultured_fibroblasts	0.03788	Liver	3	1.28198e-16	3	-2.07615	-2.07615	-2.07615	3.14018e-16	1
ENSG00000172469.15	MANEA	0.0379136	49	4	0.0550763	Brain_Caudate_basal_ganglia	0.9963	Brain_Hypothalamus	26.0563	1.34273e-15	1.65739	-1.87201	1.91827	-0.348587	1.13724	4
ENSG00000226676.1	RP11-589B3.6	0.0379618	9	3	0.02508	Brain_Nucleus_accumbens_basal_ganglia	0.7213	Brain_Cortex	7.45264	6.52608e-17	0.645921	-2.24017	-0.356722	-1.15475	0.847478	3
ENSG00000187048.12	CYP4A11	0.0379944	27	4	0.001729	Brain_Hippocampus	0.95401	Esophagus_Mucosa	19.2382	3.66899e-16	0.973192	-3.13322	0.835742	-1.59273	1.08612	4
ENSG00000122971.8	ACADS	0.037998	48	5	0.018347	Spleen	0.992581	Lung	33.9446	6.71991e-16	1.20604	-2.14722	2.35854	-0.609691	0.803104	5
ENSG00000230472.5	RP1-28O17.1	0.03805	1	1	0.03805	Testis	0.03805	Testis	1	1	1	-2.07432	-2.07432	-2.07432	NA	1
ENSG00000144381.16	HSPD1	0.0380723	6	3	0.008607	Cells_Cultured_fibroblasts	0.3192	Colon_Sigmoid	3.06307	6.09756e-17	1.11791	-2.62728	2.62728	0	2.21526	3
ENSG00000006025.11	OSBPL7	0.0381067	47	4	0.00891657	Lung	0.9858	Colon_Sigmoid	30.5093	5.51298e-16	1.19968	-2.61524	2.41801	0.171886	0.638721	4
ENSG00000185610.6	DBX2	0.0381371	18	3	0.044357	Artery_Coronary	0.3259	Brain_Hippocampus	11.1218	3.19772e-18	2.75417	-2.0107	1.96955	-0.640975	1.25476	3
ENSG00000169136.10	ATF5	0.0381424	48	5	0.009771	Vagina	0.969893	Artery_Aorta	30.4896	2.87581e-15	1.01773	-2.58383	1.04041	-0.631321	0.703788	5
ENSG00000185303.16	SFTPA2	0.0381932	22	7	0.003804	Breast_Mammary_Tissue	0.9795	Brain_Cortex	11.284	4.60957e-18	0.445189	-2.89397	2.89397	-0.678499	2.12175	7
ENSG00000236641.1	CTA-221G9.7	0.0382241	5	4	0.008153	Skin_Not_Sun_Exposed_Suprapubic	0.2012	Thyroid	2.12539	4.3203e-17	0.292079	-2.64567	-1.27814	-1.89008	0.633935	4
ENSG00000197251.3	LINC00336	0.0382679	21	2	0.03749	Testis	0.6421	Lung	19.2545	8.90846e-18	0.801053	-2.08039	-0.464765	-1.26909	0.44119	2
ENSG00000169252.5	ADRB2	0.0382913	31	6	0.007859	Adipose_Subcutaneous	0.744646	Liver	21.2662	1.94146e-15	0.77095	-1.33539	2.65807	-0.372108	1.13292	6
ENSG00000281097.1	LINC01395	0.0383081	4	4	0.1542	Skin_Not_Sun_Exposed_Suprapubic	0.6564	Esophagus_Mucosa	1.83124	0.094053	0.094053	-1.42485	1.36644	-0.389042	1.23807	4
ENSG00000076864.19	RAP1GAP	0.0383186	35	9	0.00175389	Colon_Transverse	0.785087	Small_Intestine_Terminal_Ileum	14.8908	6.62994e-16	0.664717	-3.12902	2.51174	0.0440679	1.42812	9
ENSG00000196890.4	HIST3H2BB	0.0383318	46	3	0.00716338	Thyroid	0.4076	Nerve_Tibial	34.8153	7.94175e-16	1.9663	-2.41262	2.68915	0.942402	1.4267	3
ENSG00000233757.6	AC092835.2	0.0384578	36	1	0.03746	Artery_Tibial	0.950902	Thyroid	35.1931	7.82633e-16	35.1931	0.0615744	2.08071	2.02463	0.336523	1
ENSG00000089356.18	FXYD3	0.0384674	21	9	0.0112643	Lung	0.7527	Colon_Sigmoid	6.28516	7.81397e-18	0.314728	-1.29767	2.53439	0.753189	1.30494	9
ENSG00000106823.12	ECM2	0.0385195	48	5	0.0009956	Artery_Aorta	0.986795	Brain_Nucleus_accumbens_basal_ganglia	22.2449	6.44863e-16	2.29043	-1.61775	3.29177	0.450212	1.07966	5
ENSG00000111254.7	AKAP3	0.0385784	49	2	0.00618256	Heart_Left_Ventricle	0.0804257	Cells_EBV-transformed_lymphocytes	46.0709	4.55285e-15	1.74867	-2.579	2.73794	2.17148	0.731878	2
ENSG00000105982.16	RNF32	0.0385785	44	6	0.00652	Brain_Hippocampus	0.985985	Esophagus_Mucosa	22.2589	4.23392e-16	1.00443	-2.72042	2.08988	-0.168217	0.968305	6
ENSG00000281538.1	RP4-669P10.20	0.0386921	29	4	0.002897	Skin_Not_Sun_Exposed_Suprapubic	0.932839	Brain_Cerebellar_Hemisphere	18.8297	4.51732e-16	0.716184	-2.97846	0.627243	0.0583101	0.67659	4
ENSG00000147481.14	SNTG1	0.0387573	17	3	0.00969938	Brain_Cerebellum	0.4974	Brain_Spinal_cord_cervical_c-1	13.6531	1.19145e-17	0.702286	-0.902119	2.58637	-0.214982	1.0292	3
ENSG00000204592.8	HLA-E	0.0387574	28	4	0.0462304	Lung	0.9877	Thyroid	21.6053	6.7049e-16	0.994421	-1.99328	0.662579	-1.47452	0.735091	4
ENSG00000283473.2	RP11-509I21.2	0.0387864	6	3	0.00620019	Thyroid	0.5336	Brain_Substantia_nigra	2.99079	5.28433e-17	0.696478	-2.737	1.31517	-1.12487	1.41593	3
ENSG00000178175.11	ZNF366	0.0387961	11	2	0.01088	Minor_Salivary_Gland	0.85	Brain_Hypothalamus	6.32794	1.24302e-18	4.67206	-2.54653	2.54653	0.128347	1.8016	2
ENSG00000079393.20	DUSP13	0.0388174	9	5	0.2158	Prostate	0.9964	Skin_Sun_Exposed_Lower_leg	4.86412	0.00098898	0.300383	-1.23347	1.23777	-0.32167	0.928625	5
ENSG00000116544.11	DLGAP3	0.0388975	13	4	0.006229	Cells_Cultured_fibroblasts	0.71	Brain_Cerebellar_Hemisphere	10.0294	2.43559e-18	0.641088	-2.73548	0.570999	-0.307604	1.01347	4
ENSG00000131373.14	HACL1	0.0389321	48	5	0.0139778	Skin_Sun_Exposed_Lower_leg	0.865849	Small_Intestine_Terminal_Ileum	32.7082	3.10553e-15	1.09062	-2.45783	0.759757	-1.49433	0.885442	5
ENSG00000254004.6	ZNF260	0.0389718	38	4	0.00213933	Skin_Not_Sun_Exposed_Suprapubic	0.7881	Brain_Hippocampus	26.2046	7.60421e-16	2.62619	-2.14105	3.07018	1.52949	1.14146	4
ENSG00000132704.15	FCRL2	0.0389787	7	2	0.02547	Colon_Transverse	0.9208	Ovary	5.12332	3.95861e-18	1.87668	-0.0994261	2.2342	1.26248	1.21376	2
ENSG00000233047.6	LINC01677	0.03903	1	1	0.03903	Testis	0.03903	Testis	1	1	1	2.06387	2.06387	2.06387	NA	1
ENSG00000144834.13	TAGLN3	0.0390856	27	5	0.05826	Brain_Anterior_cingulate_cortex_BA24	0.9069	Adipose_Visceral_Omentum	18.345	1.17564e-15	0.662519	-1.34943	1.89374	0.328488	0.695102	5
ENSG00000166592.11	RRAD	0.0390913	3	3	0.02514	Esophagus_Mucosa	0.2454	Ovary	1.30743	0.574664	0.574664	1.16159	2.23924	1.78332	0.55763	3
ENSG00000235888.1	AF064858.8	0.0391291	31	11	0.0190121	Brain_Substantia_nigra	0.909288	Whole_Blood	14.6648	1.41488e-15	0.498347	-2.29422	2.34529	0.16919	1.46709	11
ENSG00000137225.12	CAPN11	0.0391298	36	10	0.00446251	Colon_Transverse	0.8533	Skin_Not_Sun_Exposed_Suprapubic	16.277	1.57455e-15	0.681639	-2.84347	2.63734	-1.03508	1.0607	10
ENSG00000162302.12	RPS6KA4	0.0391437	26	5	0.01123	Minor_Salivary_Gland	0.9652	Pituitary	16.8976	7.72095e-16	0.810494	-1.30946	2.53546	0.42445	1.34548	5
ENSG00000163508.12	EOMES	0.0392455	36	3	0.004782	Artery_Aorta	0.8455	Adipose_Visceral_Omentum	22.7497	1.20904e-15	1.56539	-0.194863	2.82136	0.637301	0.866506	3
ENSG00000228570.7	NUTM2E	0.0393091	26	3	0.009326	Brain_Spinal_cord_cervical_c-1	0.889561	Pituitary	21.4338	1.0888e-15	0.800149	0.13886	2.59987	0.729913	0.419467	3
ENSG00000028116.16	VRK2	0.039457	47	4	0.003212	Adipose_Visceral_Omentum	0.976581	Cells_EBV-transformed_lymphocytes	30.5077	2.623e-15	2.47616	-2.59299	2.94669	0.264598	1.01282	4
ENSG00000137266.14	SLC22A23	0.039513	45	5	0.0173206	Skin_Not_Sun_Exposed_Suprapubic	0.948948	Esophagus_Mucosa	25.0149	9.30563e-16	1.08534	-2.37983	2.16068	0.489701	1.36188	5
ENSG00000254206.5	NPIPB11	0.03953	1	1	0.03953	Whole_Blood	0.03953	Whole_Blood	1	1	1	2.05863	2.05863	2.05863	NA	1
ENSG00000164002.11	EXO5	0.0395781	49	4	0.010971	Cells_Cultured_fibroblasts	0.936437	Brain_Substantia_nigra	38.3253	6.61585e-16	1.66043	-2.54362	1.15742	-1.33192	0.862784	4
ENSG00000180530.10	NRIP1	0.0395932	7	6	0.02081	Colon_Sigmoid	0.938	Cells_Cultured_fibroblasts	2.95294	1.35811e-17	0.449968	-2.31141	1.36231	-1.13597	1.37444	6
ENSG00000257556.1	RP11-44N21.1	0.0396052	45	4	0.0171178	Ovary	0.937	Colon_Sigmoid	20.9526	4.44657e-16	1.70084	-2.37645	2.38417	0.470405	1.0515	4
ENSG00000163354.14	DCST2	0.0396125	49	3	0.00917546	Skin_Sun_Exposed_Lower_leg	0.887	Adipose_Visceral_Omentum	40.8805	1.45706e-15	1.39067	-2.60545	0.405378	-0.702025	0.577837	3
ENSG00000124215.16	CDH26	0.0396499	37	2	0.002158	Brain_Frontal_Cortex_BA9	0.794644	Adipose_Subcutaneous	33.1582	3.16554e-15	1.30397	-3.06758	2.27861	-2.23106	1.00532	2
ENSG00000168135.4	KCNJ4	0.0397548	28	4	0.006377	Adipose_Visceral_Omentum	0.9849	Minor_Salivary_Gland	16.559	1.2078e-15	0.906489	-2.72774	2.72774	-1.14892	1.59718	4
ENSG00000261304.1	CTD-2125J1.1	0.0398946	1	1	0.0398946	Testis	0.0398946	Testis	1	1	1	-2.05484	-2.05484	-2.05484	NA	1
ENSG00000122025.14	FLT3	0.0399426	32	6	0.04933	Adipose_Subcutaneous	0.9206	Thyroid	16.8186	6.53652e-16	0.635871	-1.62155	1.96573	0.371174	1.35532	6
ENSG00000073578.16	SDHA	0.039967	40	7	0.00512499	Uterus	0.9982	Heart_Atrial_Appendage	16.7493	3.61903e-16	0.619245	-2.79907	2.60078	-0.799211	1.24326	7
ENSG00000183011.13	NAA38	0.0399738	35	4	0.0339446	Artery_Tibial	0.642316	Prostate	28.143	5.27911e-16	0.975409	-1.21912	2.12073	1.36024	0.700903	4
ENSG00000105559.11	PLEKHA4	0.0399855	47	2	0.00899468	Brain_Spinal_cord_cervical_c-1	0.7715	Artery_Coronary	35.9961	2.19957e-15	10.6505	-2.60528	2.61226	1.5524	1.03948	2
ENSG00000101158.13	NELFCD	0.0400111	48	2	0.114973	Testis	0.916293	Brain_Putamen_basal_ganglia	43.7596	9.4058e-16	1.64592	-1.50077	1.57623	-0.974243	0.566352	2
ENSG00000104341.16	LAPTM4B	0.0401191	43	8	0.0309118	Heart_Left_Ventricle	0.978921	Colon_Sigmoid	18.904	1.78306e-15	0.66521	-2.15821	2.13614	0.0547357	0.916301	8
ENSG00000113532.12	ST8SIA4	0.0401426	35	2	0.03014	Lung	0.3849	Adipose_Subcutaneous	31.0323	1.64686e-15	1.27497	-2.16825	2.16825	-1.07985	1.64053	2
ENSG00000074964.16	ARHGEF10L	0.0401889	12	5	0.00239749	Thyroid	0.8049	Vagina	6.99369	1.15538e-17	0.279716	-3.03599	0.817925	0.179407	1.02372	5
ENSG00000198108.3	CHSY3	0.0402756	33	2	0.003828	Liver	0.982731	Artery_Coronary	19.1453	3.20459e-16	13.4198	-2.892	2.49481	0.630873	1.62721	2
ENSG00000262188.1	LINC01978	0.0403801	27	7	0.01254	Brain_Frontal_Cortex_BA9	0.893129	Pancreas	14.7078	1.10107e-15	0.69799	-1.68801	2.49657	-0.287652	1.09656	7
ENSG00000258713.2	C20orf141	0.0403887	4	2	0.06897	Adipose_Subcutaneous	0.814248	Adipose_Visceral_Omentum	3.65281	3.79806e-18	0.347185	-1.81862	1.81862	0.513392	1.72463	2
ENSG00000161609.9	CCDC155	0.0404301	14	2	0.02487	Brain_Hypothalamus	0.2178	Brain_Cerebellum	10.4325	5.01763e-17	3.43513	-2.24342	-1.2324	-1.85074	0.327707	2
ENSG00000231427.5	LINC01445	0.040474	13	3	0.04134	Brain_Hippocampus	0.3578	Brain_Frontal_Cortex_BA9	10.0802	4.69134e-17	0.836784	-1.69672	2.0401	1.20915	1.32384	3
ENSG00000266869.1	RP6-114E22.1	0.04049	1	1	0.04049	Testis	0.04049	Testis	1	1	1	-2.04871	-2.04871	-2.04871	NA	1
ENSG00000174307.6	PHLDA3	0.040514	47	5	0.00646643	Artery_Tibial	0.9333	Stomach	22.7314	4.12647e-16	1.09636	-2.72314	2.03066	0.770328	1.02927	5
ENSG00000234690.6	AC073283.4	0.0405146	46	3	0.00366634	Brain_Substantia_nigra	0.953672	Small_Intestine_Terminal_Ileum	33.2104	1.2104e-15	3.12956	-2.90553	1.98757	-1.5639	0.869113	3
ENSG00000151360.9	ALLC	0.0405931	32	6	0.0148913	Adipose_Visceral_Omentum	0.9442	Testis	18.9596	1.75393e-15	0.654027	-1.28899	2.43501	-0.538016	0.896709	6
ENSG00000184574.9	LPAR5	0.0406007	45	3	0.00205944	Colon_Sigmoid	0.4113	Brain_Cortex	27.5885	1.14759e-15	7.39809	-0.840193	3.08152	1.64399	0.91559	3
ENSG00000174456.13	C12orf76	0.0406121	34	3	0.0268665	Spleen	0.2374	Brain_Hippocampus	29.0213	1.50291e-15	1.96077	-2.21345	1.62859	-0.445975	1.60963	3
ENSG00000259807.1	RP11-426C22.4	0.0406217	30	5	0.08699	Artery_Coronary	0.988893	Brain_Spinal_cord_cervical_c-1	15.353	1.40591e-15	0.572203	-1.71149	1.20553	-0.139701	0.728305	5
ENSG00000124782.19	RREB1	0.0406555	27	5	0.002355	Brain_Cerebellum	0.7418	Cells_Cultured_fibroblasts	16.7168	7.4508e-16	0.924985	-3.04138	2.7429	1.35413	1.31782	5
ENSG00000185670.7	ZBTB3	0.0407375	31	1	0.01651	Adrenal_Gland	0.923107	Brain_Hippocampus	30.0015	5.1073e-16	30.0015	-2.39744	-0.0965208	-1.98353	0.463501	1
ENSG00000145063.14	AC062028.1	0.0407473	11	6	0.02478	Brain_Putamen_basal_ganglia	0.801991	Brain_Cortex	4.64658	4.7811e-17	0.515831	-1.36231	2.24482	0.705794	1.34615	6
ENSG00000110955.8	ATP5B	0.04083	47	1	0.04083	Adipose_Visceral_Omentum	0.04083	Brain_Putamen_basal_ganglia	47	2.02467e-15	47	-2.04525	2.04525	1.00087	1.80291	1
ENSG00000166770.10	ZNF667-AS1	0.0408519	47	4	0.0853266	Pancreas	0.992621	Skin_Sun_Exposed_Lower_leg	33.2505	3.23754e-15	1.69307	-1.72058	1.25351	-0.252208	0.716974	4
ENSG00000166278.14	C2	0.0408586	18	8	0.1477	Adrenal_Gland	0.9596	Heart_Left_Ventricle	8.03567	8.62487e-31	0.306161	-1.33799	1.4477	0.228581	0.890761	8
ENSG00000171148.13	TADA3	0.040881	48	4	0.00260524	Adipose_Visceral_Omentum	0.9381	Brain_Frontal_Cortex_BA9	40.8836	1.70587e-15	1.3878	0.0776581	3.01084	2.52851	0.582512	4
ENSG00000266312.1	LINC01927	0.040891	4	3	0.0480971	Pituitary	0.901293	Testis	2.20236	0.000244562	0.805599	-1.91135	1.97651	-0.484769	1.84123	3
ENSG00000164053.19	ATRIP	0.0408919	48	2	0.0814279	Nerve_Tibial	0.782384	Brain_Spinal_cord_cervical_c-1	45.5409	1.39367e-15	2.28907	-0.863686	1.74246	1.17427	0.526706	2
ENSG00000203722.7	RAET1G	0.0409485	37	2	0.009888	Brain_Hippocampus	0.3242	Skin_Sun_Exposed_Lower_leg	34.5649	5.42094e-16	1.75195	-2.57972	2.57972	2.05738	1.34033	2
ENSG00000233005.1	AC067959.1	0.0409646	17	3	0.0774624	Minor_Salivary_Gland	0.814783	Adipose_Subcutaneous	15.222	2.91926e-18	0.650906	-1.7656	1.45453	0.368649	0.900968	3
ENSG00000163512.13	AZI2	0.0409689	47	4	0.00487191	Esophagus_Muscularis	0.481606	Adrenal_Gland	33.8008	2.20071e-15	2.24314	-2.81538	1.86	-1.33239	1.441	4
ENSG00000111817.16	DSE	0.0409714	48	8	0.00243165	Brain_Cerebellar_Hemisphere	0.998813	Adrenal_Gland	16.413	6.08636e-16	0.663791	-3.03172	2.06803	0.173241	1.40497	8
ENSG00000261055.1	RP11-195M16.3	0.04098	1	1	0.04098	Adrenal_Gland	0.04098	Adrenal_Gland	1	1	1	-2.04373	-2.04373	-2.04373	NA	1
ENSG00000248866.1	USP46-AS1	0.040985	4	1	0.0116	Nerve_Tibial	0.06094	Heart_Atrial_Appendage	3.96627	8.02251e-19	3.96627	-2.52408	-1.87393	-2.03647	0.325077	1
ENSG00000158516.11	CPA2	0.0410004	16	5	0.00800246	Pancreas	0.6853	Stomach	11.4419	2.38931e-17	0.541879	-2.65197	1.86974	-0.112426	1.94137	5
ENSG00000019582.14	CD74	0.0410209	35	4	0.006374	Brain_Frontal_Cortex_BA9	0.8746	Thyroid	24.1034	9.1792e-16	0.973298	-0.468118	2.72789	1.63333	1.06059	4
ENSG00000171703.16	TCEA2	0.0410511	45	7	0.00329731	Muscle_Skeletal	0.946995	Skin_Not_Sun_Exposed_Suprapubic	24.4491	2.32739e-15	0.863523	-2.38391	2.93857	-0.0132261	1.42449	7
ENSG00000105852.10	PON3	0.0411004	47	5	0.00928929	Skin_Sun_Exposed_Lower_leg	0.852233	Nerve_Tibial	17.9365	7.5087e-16	1.09147	-2.60122	1.70155	-1.00768	1.20344	5
ENSG00000224032.6	EPB41L4A-AS1	0.0411097	17	3	0.121	Artery_Tibial	0.9351	Brain_Cortex	14.1994	3.2724e-17	0.99304	-1.47691	1.55059	0.280449	0.956236	3
ENSG00000229321.1	AC008269.2	0.0411105	9	4	0.00893	Pituitary	0.6538	Brain_Caudate_basal_ganglia	5.4879	6.6084e-17	0.606912	-2.61472	-0.448489	-2.1996	0.67557	4
ENSG00000262223.6	RP11-1055B8.3	0.0411199	41	2	0.0181588	Lung	0.81431	Nerve_Tibial	37.2413	6.87606e-16	1.37841	-0.234869	2.36236	1.00717	0.421158	2
ENSG00000182318.5	ZSCAN22	0.0411457	15	5	0.003108	Artery_Aorta	0.6135	Muscle_Skeletal	8.8765	1.51929e-64	0.768981	-1.15938	2.95685	0.0594453	1.3712	5
ENSG00000185404.16	SP140L	0.0411927	38	6	0.000547991	Esophagus_Gastroesophageal_Junction	0.7594	Heart_Left_Ventricle	20.2266	3.57288e-16	0.790749	-3.45613	0.703571	-1.69032	1.09377	6
ENSG00000205056.8	RP11-693J15.5	0.0412246	17	4	0.00233951	Brain_Cerebellum	0.847381	Colon_Transverse	10.2703	6.05454e-18	0.823314	-2.02517	3.04336	1.07489	1.49633	4
ENSG00000232063.1	RP11-307E17.8	0.0412345	44	4	0.0107413	Colon_Transverse	0.801803	Heart_Atrial_Appendage	28.8335	5.97783e-16	1.5788	-2.551	0.378293	-1.81533	0.745009	4
ENSG00000124212.5	PTGIS	0.0412391	43	6	0.0242779	Brain_Caudate_basal_ganglia	0.982304	Cells_Cultured_fibroblasts	16.4805	5.738e-16	0.707099	-1.96331	2.2527	0.451019	1.30822	6
ENSG00000146856.14	AGBL3	0.0413265	43	5	0.057925	Artery_Aorta	0.971678	Brain_Hypothalamus	21.9976	1.62408e-15	0.966846	-1.12521	1.89627	0.174799	0.985358	5
ENSG00000094796.4	KRT31	0.0413271	30	4	0.025803	Brain_Cerebellar_Hemisphere	0.769391	Esophagus_Gastroesophageal_Junction	18.4595	1.24181e-15	1.20089	-1.5456	2.22916	-0.186021	0.803881	4
ENSG00000274529.5	SEBOX	0.04135	1	1	0.04135	Liver	0.04135	Liver	1	1	1	-2.04	-2.04	-2.04	NA	1
ENSG00000070367.15	EXOC5	0.0413772	45	1	0.03952	Adipose_Visceral_Omentum	0.183431	Brain_Hippocampus	44.6014	3.01213e-15	44.6014	-2.05873	2.05873	1.93674	0.625753	1
ENSG00000142615.7	CELA2A	0.0414109	40	4	0.005481	Brain_Cortex	0.503321	Nerve_Tibial	22.5858	4.45687e-16	0.960485	-2.13099	2.77732	1.5644	1.49732	4
ENSG00000165949.12	IFI27	0.0414197	29	5	0.04075	Vagina	0.95925	Esophagus_Gastroesophageal_Junction	14.3537	1.37697e-15	0.637209	-2.04606	0.894789	-0.289236	0.82749	5
ENSG00000135537.16	LACE1	0.0414928	11	2	0.04116	Brain_Nucleus_accumbens_basal_ganglia	0.3889	Brain_Cerebellum	6.90651	2.17599e-33	3.97577	-1.18201	2.04191	0.431509	1.52745	2
ENSG00000122861.15	PLAU	0.0415319	47	2	0.00786261	Brain_Anterior_cingulate_cortex_BA24	0.9497	Adipose_Visceral_Omentum	27.6209	2.42186e-15	17.3839	-2.65791	0.166327	-1.75616	0.825794	2
ENSG00000180592.16	SKIDA1	0.0415742	45	2	0.0161098	Stomach	0.783145	Liver	42.8134	1.57144e-15	1.62103	0.275223	2.40642	2.25626	0.315333	2
ENSG00000122304.10	PRM2	0.0416084	20	2	0.01051	Heart_Left_Ventricle	0.3607	Adipose_Subcutaneous	14.1581	2.07941e-17	5.81897	-2.55858	2.55858	-1.17929	1.70579	2
ENSG00000176971.3	FIBIN	0.0416186	19	4	0.0169	Breast_Mammary_Tissue	0.4989	Brain_Anterior_cingulate_cortex_BA24	15.0639	1.40287e-18	0.752431	-0.676222	2.38888	0.163273	1.13354	4
ENSG00000172831.11	CES2	0.0416552	28	4	0.1069	Adrenal_Gland	0.745309	Heart_Left_Ventricle	22.0328	6.57824e-16	1.22905	-1.61228	1.59505	0.842018	0.851743	4
ENSG00000164816.7	DEFA5	0.04166	1	1	0.04166	Liver	0.04166	Liver	1	1	1	-2.0369	-2.0369	-2.0369	NA	1
ENSG00000188869.12	TMC3	0.0416847	25	4	0.00755168	Brain_Cerebellar_Hemisphere	0.9215	Brain_Anterior_cingulate_cortex_BA24	18.1034	2.5368e-17	0.928492	-0.875687	2.67148	-0.237363	0.831493	4
ENSG00000272053.1	RP11-367G6.3	0.0416877	12	4	0.05191	Colon_Transverse	0.9913	Adipose_Subcutaneous	5.1273	5.92952e-18	0.51232	-0.161373	1.94388	0.537356	0.871661	4
ENSG00000173114.12	LRRN3	0.0416999	48	4	0.03773	Adrenal_Gland	0.914858	Artery_Aorta	39.2005	2.22245e-15	1.79766	-2.07778	2.07778	0.518131	1.86877	4
ENSG00000053770.11	AP5M1	0.0417027	46	1	0.03952	Adipose_Visceral_Omentum	0.3127	Adipose_Subcutaneous	45.9833	4.54523e-15	45.9833	-2.05873	-1.00957	-2.03592	0.15469	1
ENSG00000168056.15	LTBP3	0.0417149	46	3	0.0124798	Cells_Cultured_fibroblasts	0.770883	Pancreas	30.8384	2.73959e-15	4.9462	-2.49828	2.33235	1.43498	0.962051	3
ENSG00000170525.19	PFKFB3	0.041735	39	8	0.00162803	Adrenal_Gland	0.9186	Colon_Sigmoid	20.2018	1.56563e-15	0.760391	-2.47606	3.15084	-0.75255	1.76112	8
ENSG00000167377.17	ZNF23	0.0417586	49	3	0.0846022	Uterus	0.969662	Prostate	38.5474	3.74851e-15	3.0646	-1.72459	1.49429	-0.176287	0.989922	3
ENSG00000182512.4	GLRX5	0.0417907	48	6	0.00111009	Heart_Atrial_Appendage	0.7977	Liver	27.9265	2.66575e-15	0.953575	-0.256325	3.26103	2.02474	0.74332	6
ENSG00000264790.1	RP11-26N15.2	0.04181	3	1	0.04181	Brain_Caudate_basal_ganglia	0.04181	Brain_Caudate_basal_ganglia	3	1.28198e-16	3	-2.03541	2.03541	0.678469	2.35028	1
ENSG00000235643.1	LINC01647	0.0418742	2	2	0.01199	Testis	0.1505	Brain_Spinal_cord_cervical_c-1	1.50926	0.490738	0.490738	-1.43777	2.51244	0.537335	2.79322	2
ENSG00000108465.14	CDK5RAP3	0.041938	49	3	0.0218188	Whole_Blood	0.913224	Brain_Hippocampus	40.3073	3.9581e-15	1.64616	-2.29351	2.06121	0.957147	0.945933	3
ENSG00000163815.5	CLEC3B	0.0419587	25	5	0.03247	Artery_Coronary	0.8892	Nerve_Tibial	12.3828	2.50906e-18	0.802283	-2.13858	1.38442	-1.17167	0.885186	5
ENSG00000112902.11	SEMA5A	0.0420074	42	7	0.001754	Kidney_Cortex	0.921124	Uterus	20.8119	6.15943e-16	0.770723	-0.764055	3.129	1.34099	0.979852	7
ENSG00000077522.12	ACTN2	0.0420918	49	7	0.003703	Adipose_Visceral_Omentum	0.916735	Minor_Salivary_Gland	28.5272	2.11698e-15	1.02772	-2.90241	2.90241	-1.81488	1.74066	7
ENSG00000127184.12	COX7C	0.0421036	4	2	0.03533	Heart_Atrial_Appendage	0.06007	Testis	3.09671	1.52588e-16	0.903293	-2.10456	-1.88028	-1.93635	0.112138	2
ENSG00000169955.7	ZNF747	0.0421037	36	2	0.06688	Adrenal_Gland	0.4523	Brain_Cerebellar_Hemisphere	32.4751	2.34349e-15	2.05826	-1.83248	0.840907	-1.59525	0.73609	2
ENSG00000087088.19	BAX	0.0421758	29	3	0.0299489	Cells_EBV-transformed_lymphocytes	0.2404	Adipose_Subcutaneous	24.7151	2.3209e-15	0.90459	-2.17077	2.00775	-1.53071	1.24005	3
ENSG00000151422.12	FER	0.0421849	28	7	0.00666	Brain_Substantia_nigra	0.815878	Muscle_Skeletal	13.3689	3.30289e-16	0.629632	-2.71338	2.71338	-0.506339	1.33726	7
ENSG00000155761.13	SPAG17	0.0421901	35	2	0.0268658	Cells_Cultured_fibroblasts	0.904347	Adrenal_Gland	32.2193	8.63925e-16	1.55701	-0.120172	2.21346	1.19842	0.408388	2
ENSG00000120370.12	GORAB	0.0422158	49	3	0.034093	Brain_Cerebellar_Hemisphere	0.950341	Skin_Sun_Exposed_Lower_leg	42.9464	6.96584e-16	1.88831	-0.325851	2.11897	1.11193	0.58338	3
ENSG00000013275.7	PSMC4	0.0422536	46	3	0.0108492	Artery_Coronary	0.906498	Esophagus_Mucosa	25.7492	9.91625e-16	7.70251	-1.40105	2.54752	1.11212	1.20939	3
ENSG00000150593.17	PDCD4	0.0422696	22	12	0.002427	Thyroid	0.8457	Artery_Coronary	5.84167	6.82765e-18	0.24131	-1.43988	3.0323	0.265587	1.01541	12
ENSG00000058056.8	USP13	0.0422759	47	9	0.0002227	Brain_Cerebellum	0.9643	Brain_Frontal_Cortex_BA9	18.9913	9.68526e-16	0.646473	-3.69177	2.67339	-0.689861	1.82752	9
ENSG00000275835.4	TUBGCP5	0.0424262	13	3	0.008672	Brain_Amygdala	0.6616	Nerve_Tibial	10.9323	4.1892e-19	0.987236	0.437705	2.62472	2.30682	0.675374	3
ENSG00000133083.14	DCLK1	0.0424391	28	5	0.00187697	Adipose_Visceral_Omentum	0.9224	Nerve_Tibial	18.9419	9.84237e-16	0.733002	-3.10904	3.09181	-1.10049	2.26387	5
ENSG00000100591.7	AHSA1	0.0424538	42	4	0.002808	Brain_Anterior_cingulate_cortex_BA24	0.6998	Brain_Substantia_nigra	24.6559	2.40902e-15	1.15782	-0.799917	2.98801	1.60202	1.01258	4
ENSG00000183735.9	TBK1	0.0425925	47	3	0.1665	Brain_Anterior_cingulate_cortex_BA24	0.997102	Brain_Amygdala	40.3377	9.50559e-16	1.51163	-0.476677	1.38354	0.412959	0.582097	3
ENSG00000105088.8	OLFM2	0.0425966	33	8	0.00275129	Skin_Sun_Exposed_Lower_leg	0.779922	Adipose_Visceral_Omentum	15.0864	5.16276e-16	0.690214	-2.99424	0.700204	-1.12548	0.793943	8
ENSG00000205111.8	CDKL4	0.04276	2	1	0.04276	Adipose_Visceral_Omentum	0.04276	Adipose_Visceral_Omentum	2	0	2	2.02605	2.02605	2.02605	0	1
ENSG00000182870.12	GALNT9	0.0427605	13	6	0.006004	Brain_Cerebellar_Hemisphere	0.9021	Cells_Cultured_fibroblasts	8.14995	7.25608e-18	0.596914	-2.74756	0.670719	0.0722965	1.00227	6
ENSG00000269473.1	CTD-2619J13.19	0.0427745	46	3	0.01391	Pancreas	0.702755	Thyroid	41.2766	6.5132e-16	2.05784	-0.489765	2.45958	1.15505	0.564348	3
ENSG00000170579.16	DLGAP1	0.0428179	35	13	0.0254691	Brain_Cortex	0.983153	Brain_Hippocampus	14.8239	1.32013e-15	0.629825	-1.88256	2.23421	0.112862	0.984281	13
ENSG00000175787.16	ZNF169	0.0428226	39	5	0.0172774	Liver	0.872061	Thyroid	24.0973	1.41246e-15	1.27393	-2.38075	2.09772	-0.0701986	1.4291	5
ENSG00000274766.1	LINC00453	0.0428892	1	1	0.0428892	Testis	0.0428892	Testis	1	1	1	-2.02479	-2.02479	-2.02479	NA	1
ENSG00000273375.1	RP11-803P9.1	0.04289	46	1	0.04289	Brain_Amygdala	0.04289	Adipose_Subcutaneous	46	1.29778e-15	46	-2.02478	2.02478	-1.93675	0.597075	1
ENSG00000163481.7	RNF25	0.0429077	48	1	0.01395	Adipose_Visceral_Omentum	0.444307	Skin_Not_Sun_Exposed_Suprapubic	47.0757	2.30548e-15	47.0757	-2.45855	2.45855	-1.76946	1.07349	1
ENSG00000188373.4	C10orf99	0.0429404	4	2	0.0243	Kidney_Cortex	0.161	Esophagus_Mucosa	3.02738	4.33563e-19	0.967087	-1.48409	2.25235	-0.508793	1.84117	2
ENSG00000138078.15	PREPL	0.0429834	38	3	0.001726	Cells_EBV-transformed_lymphocytes	0.865899	Liver	31.4578	7.09142e-16	2.15881	-2.62074	3.13373	-1.48776	1.3723	3
ENSG00000187288.10	CIDEC	0.0430242	30	4	0.0138016	Adipose_Subcutaneous	0.3973	Brain_Putamen_basal_ganglia	17.8819	1.29696e-15	0.936042	-2.20864	2.46239	1.43404	1.057	4
ENSG00000071205.11	ARHGAP10	0.0430364	5	4	0.01607	Cells_Cultured_fibroblasts	0.6324	Adipose_Subcutaneous	2.02835	1.55939e-16	0.54521	-2.40732	1.82906	-0.0840387	1.59694	4
ENSG00000273124.1	RP11-236B18.5	0.0430511	10	3	0.01247	Brain_Anterior_cingulate_cortex_BA24	0.9483	Brain_Amygdala	6.10483	1.3536e-31	0.981621	-0.0648417	2.49856	0.556055	0.891064	3
ENSG00000253339.1	RP11-434I12.3	0.04306	1	1	0.04306	Liver	0.04306	Liver	1	1	1	2.02313	2.02313	2.02313	NA	1
ENSG00000124249.6	KCNK15	0.0430855	44	7	0.0628399	Muscle_Skeletal	0.983855	Vagina	25.6349	8.38135e-16	1.10467	-1.86032	1.31533	-0.408048	0.957933	7
ENSG00000037757.13	MRI1	0.0431538	49	2	0.01652	Liver	0.843347	Brain_Cerebellar_Hemisphere	46.2104	1.9504e-15	2.4436	-2.39722	-0.197614	-1.58277	0.447151	2
ENSG00000273582.1	RP11-426C22.7	0.0431683	3	3	0.0252	Brain_Spinal_cord_cervical_c-1	0.9401	Brain_Substantia_nigra	2.01865	0.32254	0.32254	0.0751442	2.23832	1.02157	1.10663	3
ENSG00000072736.18	NFATC3	0.0432031	48	4	0.01519	Artery_Coronary	0.999501	Skin_Not_Sun_Exposed_Suprapubic	32.5964	6.92499e-16	1.36105	-2.42782	1.31562	0.112374	0.828121	4
ENSG00000226913.1	BSN-AS2	0.0432122	32	2	0.008467	Brain_Hippocampus	0.8113	Colon_Sigmoid	28.7708	7.4277e-16	2.7527	-0.238749	2.63286	1.54911	0.539041	2
ENSG00000162877.12	PM20D1	0.0432329	49	2	0.0076113	Brain_Anterior_cingulate_cortex_BA24	0.7127	Brain_Cerebellar_Hemisphere	44.0219	5.84064e-16	2.15882	-0.368232	2.66884	2.28859	0.619454	2
ENSG00000164604.12	GPR85	0.0433794	35	6	0.000990693	Lung	0.993701	Artery_Tibial	18.8526	4.92503e-16	0.709784	-3.29316	1.47111	0.0318264	1.05575	6
ENSG00000160190.13	SLC37A1	0.0433947	42	7	0.000971954	Esophagus_Mucosa	0.995921	Colon_Sigmoid	20.8308	1.68642e-15	0.8222	-1.47393	3.29852	0.36252	1.31643	7
ENSG00000073331.17	ALPK1	0.0434406	27	7	0.00852	Esophagus_Muscularis	0.9863	Brain_Putamen_basal_ganglia	14.6846	3.76736e-16	0.650718	-1.74747	2.63074	1.19752	1.43848	7
ENSG00000132676.15	DAP3	0.0435957	16	4	0.003731	Pancreas	1	Adipose_Subcutaneous	12.5751	1.10035e-17	0.554562	-0.649214	2.90005	0.132025	0.787812	4
ENSG00000272906.1	RP11-533E19.7	0.0436212	25	2	0.0121824	Small_Intestine_Terminal_Ileum	0.674	Brain_Anterior_cingulate_cortex_BA24	13.6225	1.34978e-32	11.3775	-2.50682	-0.420665	-1.38228	1.02168	2
ENSG00000198625.12	MDM4	0.0437387	37	3	0.002865	Artery_Tibial	0.949251	Artery_Aorta	32.6545	5.00434e-16	1.72499	-2.98186	0.526271	-0.290846	0.606149	3
ENSG00000278376.1	RP11-158I9.8	0.0437513	49	2	0.008607	Spleen	0.348092	Brain_Cortex	45.1897	7.09157e-16	3.34055	0.938297	2.62728	1.99751	0.427757	2
ENSG00000091490.10	SEL1L3	0.0437907	47	8	0.00864488	Colon_Sigmoid	0.977143	Brain_Nucleus_accumbens_basal_ganglia	20.5408	6.64859e-16	0.869353	-1.91174	2.62579	0.241998	1.32686	8
ENSG00000160345.12	C9orf116	0.0438224	34	4	0.00243025	Thyroid	0.7892	Artery_Coronary	26.1057	6.64507e-16	1.08412	-3.03189	1.11371	-0.361697	0.778823	4
ENSG00000128610.11	FEZF1	0.043827	7	4	0.163	Brain_Spinal_cord_cervical_c-1	0.964619	Brain_Cortex	4.6607	2.21692e-18	0.302037	-1.39505	-0.0443586	-1.04714	0.449942	4
ENSG00000169908.11	TM4SF1	0.0438356	45	8	0.04561	Liver	0.9541	Artery_Tibial	20.213	6.14061e-16	0.773738	-1.99898	1.99898	-0.107652	1.48917	8
ENSG00000211445.11	GPX3	0.043859	29	6	0.0284167	Brain_Nucleus_accumbens_basal_ganglia	0.98278	Artery_Coronary	11.974	1.08854e-15	0.568873	-2.19149	1.7444	0.0967213	1.07753	6
ENSG00000184281.14	TSSC4	0.0438727	40	3	0.02644	Heart_Atrial_Appendage	0.849076	Brain_Caudate_basal_ganglia	35.813	6.47147e-16	1.55569	-1.83437	2.21969	-1.11388	0.860828	3
ENSG00000188042.7	ARL4C	0.043956	15	9	0.0013908	Brain_Cerebellar_Hemisphere	0.6367	Uterus	4.28635	3.68105e-18	0.673743	-1.73868	3.19655	0.330091	1.43465	9
ENSG00000132361.16	CLUH	0.0439687	9	6	0.007853	Cells_Cultured_fibroblasts	0.9079	Brain_Cerebellar_Hemisphere	5.73793	6.34939e-17	0.298571	-1.27644	2.65833	0.509586	1.16945	6
ENSG00000105229.6	PIAS4	0.0440421	28	5	0.00781303	Stomach	0.954591	Pancreas	18.6855	1.7492e-15	0.710567	-1.7779	2.66004	0.163784	1.05529	5
ENSG00000076706.16	MCAM	0.0440704	6	4	0.008954	Adipose_Subcutaneous	0.628384	Brain_Cerebellum	2.11119	7.45314e-17	0.95174	-2.34635	2.61381	-0.138547	1.83869	4
ENSG00000100714.15	MTHFD1	0.044138	49	2	0.00672637	Brain_Spinal_cord_cervical_c-1	0.3751	Brain_Frontal_Cortex_BA9	43.5147	1.27141e-15	2.86717	-1.8306	2.7101	2.26207	0.679504	2
ENSG00000111206.12	FOXM1	0.0442559	28	5	0.04308	Kidney_Cortex	0.6837	Brain_Frontal_Cortex_BA9	18.6182	1.62142e-15	0.645649	-2.02293	1.66476	-0.732553	1.12465	5
ENSG00000123505.15	AMD1	0.0442687	37	3	0.01237	Brain_Putamen_basal_ganglia	0.659792	Testis	26.1994	8.22533e-16	4.44374	-2.50141	2.50141	1.0135	1.8967	3
ENSG00000106605.10	BLVRA	0.0442947	47	4	0.00290048	Adipose_Visceral_Omentum	0.8767	Heart_Atrial_Appendage	26.5139	8.5667e-16	2.5285	-0.237478	2.97809	1.72174	0.784825	4
ENSG00000064989.12	CALCRL	0.0444068	38	3	0.01405	Muscle_Skeletal	0.6283	Heart_Atrial_Appendage	27.5262	3.94662e-16	1.06177	-2.45598	2.45598	0.0766555	1.1592	3
ENSG00000128045.6	RASL11B	0.0444258	44	5	0.00398855	Skin_Not_Sun_Exposed_Suprapubic	0.703852	Minor_Salivary_Gland	20.1422	5.37518e-16	0.748205	-2.87907	2.22101	-1.42085	1.60107	5
ENSG00000132716.18	DCAF8	0.0444916	37	1	0.03609	Adipose_Visceral_Omentum	0.3862	Kidney_Cortex	35.4499	9.56026e-16	35.4499	0.866529	2.09591	1.95727	0.296904	1
ENSG00000144895.11	EIF2A	0.0445421	49	1	0.0194207	Adipose_Visceral_Omentum	0.174037	Adrenal_Gland	46.2461	1.25199e-15	46.2461	-2.33736	-1.35935	-1.94988	0.22967	1
ENSG00000170270.4	GON7	0.044543	40	7	0.009833	Kidney_Cortex	0.510055	Muscle_Skeletal	15.9446	4.45719e-16	0.643652	-1.57395	2.58165	0.184081	1.12328	7
ENSG00000157593.18	SLC35B2	0.0445564	30	5	0.0597367	Colon_Sigmoid	0.9585	Brain_Nucleus_accumbens_basal_ganglia	11.514	6.48025e-16	1.35177	-1.23841	1.88273	0.391028	0.870385	5
ENSG00000158201.9	ABHD3	0.0446544	11	3	0.00895894	Esophagus_Mucosa	0.5134	Brain_Spinal_cord_cervical_c-1	6.82809	4.4331e-17	0.73076	0.653553	2.61362	1.94539	0.571601	3
ENSG00000182261.3	NLRP10	0.0446702	4	1	0.03623	Cells_Cultured_fibroblasts	0.05846	Testis	3.94275	1.68408e-16	3.94275	1.89223	2.09434	1.99333	0.116636	1
ENSG00000272121.1	RP4-555D20.4	0.0446723	6	1	0.04404	Brain_Anterior_cingulate_cortex_BA24	0.04596	Brain_Spinal_cord_cervical_c-1	6	1.0434e-16	6	1.99576	2.01371	2.00773	0.009269	1
ENSG00000135443.8	KRT85	0.0446743	17	3	0.007063	Lung	0.7776	Adipose_Subcutaneous	12.9857	2.77907e-17	0.957435	-0.584913	2.69386	0.409482	0.657	3
ENSG00000197568.13	HHLA3	0.0446872	46	3	0.00956	Ovary	0.8602	Colon_Transverse	39.2668	1.42598e-15	2.52236	-0.233981	2.59135	1.55352	0.635727	3
ENSG00000027697.13	IFNGR1	0.0446889	40	5	0.0200103	Brain_Frontal_Cortex_BA9	0.960927	Colon_Sigmoid	18.6514	5.91289e-16	1.24247	-2.32615	1.00458	-0.243935	0.630938	5
ENSG00000178878.12	APOLD1	0.0447091	22	4	0.0262316	Cells_EBV-transformed_lymphocytes	0.9287	Spleen	17.3884	1.61416e-17	0.841584	-0.619936	2.22277	1.23022	1.06854	4
ENSG00000257261.5	RP11-96H19.1	0.0447187	49	2	0.0103358	Skin_Not_Sun_Exposed_Suprapubic	0.4879	Cells_Cultured_fibroblasts	45.81	1.80682e-15	2.06681	-2.56439	1.19476	-2.35247	0.579007	2
ENSG00000174428.16	GTF2IRD2B	0.04478	1	1	0.04478	Artery_Tibial	0.04478	Artery_Tibial	1	1	1	-2.00672	-2.00672	-2.00672	NA	1
ENSG00000185888.5	PRSS38	0.04485	1	1	0.04485	Testis	0.04485	Testis	1	1	1	2.00606	2.00606	2.00606	NA	1
ENSG00000236719.2	OVAAL	0.04485	1	1	0.04485	Testis	0.04485	Testis	1	1	1	2.00606	2.00606	2.00606	NA	1
ENSG00000164830.18	OXR1	0.0448922	16	5	0.006773	Brain_Cortex	0.9984	Esophagus_Muscularis	8.06811	2.63241e-18	0.351175	-1.22228	2.7078	1.33432	1.51587	5
ENSG00000160563.13	MED27	0.0448994	4	3	0.006663	Brain_Putamen_basal_ganglia	0.8437	Artery_Aorta	2.09506	7.81897e-17	0.67593	-2.71323	2.71323	-0.0314907	2.2258	3
ENSG00000258935.1	RP11-1078H9.2	0.04492	1	1	0.04492	Brain_Cerebellum	0.04492	Brain_Cerebellum	1	1	1	-2.0054	-2.0054	-2.0054	NA	1
ENSG00000078269.14	SYNJ2	0.0449265	47	6	0.000891308	Artery_Tibial	0.773932	Adrenal_Gland	21.074	1.49758e-15	1.1926	-3.02746	3.32276	1.42651	1.63124	6
ENSG00000170027.6	YWHAG	0.0449269	17	4	0.01617	Adipose_Visceral_Omentum	0.932355	Esophagus_Mucosa	10.7051	1.25347e-18	0.965771	-0.968289	2.40506	1.13107	1.4102	4
ENSG00000129566.12	TEP1	0.0449343	48	4	0.04502	Brain_Amygdala	0.9979	Kidney_Cortex	37.7221	8.20425e-16	1.56677	-1.07786	2.00447	0.287457	0.734957	4
ENSG00000178257.3	PRM3	0.04495	1	1	0.04495	Testis	0.04495	Testis	1	1	1	2.00512	2.00512	2.00512	NA	1
ENSG00000104129.9	DNAJC17	0.0450284	25	1	0.03208	Pancreas	0.05527	Nerve_Tibial	23.6935	1.11613e-17	23.6935	-2.14341	1.94438	-1.49147	1.29571	1
ENSG00000175643.8	RMI2	0.0450396	45	3	0.003822	Vagina	0.96275	Esophagus_Muscularis	33.1428	3.20823e-15	2.26103	-0.994425	2.89249	0.670024	1.08903	3
ENSG00000136636.12	KCTD3	0.0451622	39	1	0.04626	Adipose_Subcutaneous	0.1113	Esophagus_Mucosa	38.0164	2.64734e-15	38.0164	-1.99301	1.99301	0.986719	1.73734	1
ENSG00000071242.11	RPS6KA2	0.0451667	10	9	0.01798	Adipose_Visceral_Omentum	0.97	Brain_Putamen_basal_ganglia	2.38756	0.0310593	0.261941	-2.36603	2.26439	-0.369564	1.41634	9
ENSG00000233858.4	AC026904.1	0.0451707	20	2	0.02574	Skin_Sun_Exposed_Lower_leg	0.3813	Breast_Mammary_Tissue	19.0106	9.6497e-18	0.989357	-2.23011	0.875504	0.720223	0.694437	2
ENSG00000137449.15	CPEB2	0.0451785	48	4	0.055828	Adipose_Visceral_Omentum	0.9846	Uterus	26.5084	8.55026e-16	1.8211	-1.83673	1.91238	-0.0252745	0.798502	4
ENSG00000225056.1	RP11-218C14.5	0.0451817	14	1	0.0335003	Brain_Cortex	0.05025	Brain_Putamen_basal_ganglia	13.8791	2.70248e-17	13.8791	-1.95783	2.12603	1.71469	1.0585	1
ENSG00000229569.1	RP11-481G8.2	0.0451828	3	3	0.08947	Testis	0.3607	Thyroid	1.51771	0.547523	0.547523	-1.6982	-0.914032	-1.28217	0.394272	3
ENSG00000100596.6	SPTLC2	0.0453239	38	10	0.0263855	Nerve_Tibial	0.9353	Artery_Aorta	13.3778	1.01955e-15	0.638471	-2.22049	1.88969	-0.236758	1.19054	10
ENSG00000171574.17	ZNF584	0.0453498	44	2	0.00206612	Ovary	0.7463	Brain_Frontal_Cortex_BA9	37.9088	3.7386e-15	3.56397	-3.08056	-0.323522	-2.26952	0.504776	2
ENSG00000120471.15	TP53AIP1	0.0453589	33	5	0.00255	Colon_Transverse	0.801361	Muscle_Skeletal	16.9492	7.00915e-16	0.688719	-1.61137	3.01734	0.269957	1.41276	5
ENSG00000145349.16	CAMK2D	0.0453843	27	11	0.05067	Esophagus_Mucosa	0.866253	Brain_Cerebellar_Hemisphere	8.80583	3.23093e-16	0.307328	-1.75781	1.95426	-0.290826	1.08234	11
ENSG00000022976.15	ZNF839	0.0454184	43	8	0.0290191	Cells_Cultured_fibroblasts	0.993	Adrenal_Gland	15.7829	5.68834e-16	0.530633	-2.18323	1.47263	-0.159899	1.04395	8
ENSG00000168092.13	PAFAH1B2	0.0454996	42	4	0.0237581	Heart_Atrial_Appendage	0.989557	Spleen	20.9943	3.49898e-16	4.00073	-2.26102	1.87342	0.423535	1.29897	4
ENSG00000223443.2	USP17L2	0.0455237	2	2	0.06163	Testis	0.3963	Nerve_Tibial	1.87631	0.123686	0.123686	-1.86895	-0.848248	-1.3586	0.721744	2
ENSG00000038002.8	AGA	0.045527	49	1	0.02233	Liver	0.4481	Kidney_Cortex	46.7383	1.93979e-15	46.7383	-2.28471	-0.758586	-1.94678	0.255759	1
ENSG00000100678.18	SLC8A3	0.0455531	25	8	0.00413452	Brain_Hippocampus	0.8302	Brain_Frontal_Cortex_BA9	11.4218	9.30764e-18	0.626635	-2.10763	2.86771	0.202446	1.17159	8
ENSG00000228541.1	AC093159.1	0.0455948	19	3	0.00408207	Brain_Caudate_basal_ganglia	0.648872	Esophagus_Mucosa	13.1513	4.70439e-18	1.10556	-2.87175	-0.45533	-1.25613	0.926002	3
ENSG00000264026.1	LINC02003	0.0456339	11	5	0.0482494	Skin_Not_Sun_Exposed_Suprapubic	0.9923	Brain_Caudate_basal_ganglia	7.07664	4.06872e-17	0.276327	-1.63018	1.97517	-0.176057	0.868236	5
ENSG00000123612.15	ACVR1C	0.0456339	19	5	0.00831	Artery_Tibial	0.9399	Skin_Sun_Exposed_Lower_leg	11.2152	3.93996e-17	0.426758	-2.63921	2.63921	0.232343	1.27989	5
ENSG00000237541.3	HLA-DQA2	0.0457043	32	4	0.00422028	Adrenal_Gland	0.814798	Whole_Blood	22.9848	3.7989e-16	0.860755	-2.86121	-0.234241	-1.02051	0.906345	4
ENSG00000165661.16	QSOX2	0.0457971	46	4	0.01929	Brain_Cerebellum	0.871652	Brain_Nucleus_accumbens_basal_ganglia	33.3299	8.70236e-16	1.73873	-2.33988	1.87259	-0.384241	0.943918	4
ENSG00000153233.12	PTPRR	0.0458076	3	2	0.0359003	Artery_Tibial	0.06223	Artery_Coronary	2.13878	7.0083e-17	0.861221	1.86465	2.09806	1.94245	0.134755	2
ENSG00000166669.13	ATF7IP2	0.045863	41	9	0.006512	Heart_Atrial_Appendage	0.989	Brain_Frontal_Cortex_BA9	15.4677	1.48627e-15	0.89679	-2.72082	1.99972	0.0714196	1.15557	9
ENSG00000163218.14	PGLYRP4	0.0458633	5	1	0.02694	Esophagus_Mucosa	0.0668	Prostate	4.98279	6.25525e-17	4.98279	-2.21239	-1.83302	-1.99306	0.200929	1
ENSG00000232884.7	AF127936.3	0.0458963	12	5	0.06961	Thyroid	0.928402	Vagina	6.0471	2.4466e-17	0.452186	-1.81444	0.8733	-0.421512	0.927136	5
ENSG00000204560.9	DHX16	0.0458994	48	4	0.00642	Brain_Caudate_basal_ganglia	0.8586	Brain_Anterior_cingulate_cortex_BA24	34.969	5.96843e-16	1.52754	-2.72552	0.759815	-1.48448	0.887739	4
ENSG00000163075.12	CFAP221	0.0459106	29	5	0.04029	Brain_Nucleus_accumbens_basal_ganglia	0.8213	Artery_Coronary	14.1751	6.03059e-16	0.659641	-2.05076	1.75916	-0.770788	0.963178	5
ENSG00000122574.10	WIPF3	0.0459353	40	11	0.000313244	Adrenal_Gland	0.930945	Thyroid	13.4484	8.85828e-16	0.458362	-3.60409	2.4514	-0.119278	1.79763	11
ENSG00000178150.9	ZNF114	0.0459515	46	3	0.0144102	Brain_Amygdala	0.411875	Colon_Transverse	36.137	8.36369e-16	2.82045	-1.31168	2.44687	1.66683	0.612626	3
ENSG00000181826.9	RELL1	0.0459538	39	8	0.0266534	Esophagus_Muscularis	0.7473	Thyroid	19.0264	1.56344e-15	0.779009	-0.881587	2.21656	1.19237	0.796212	8
ENSG00000245651.2	RP11-620J15.2	0.046065	26	2	0.006045	Testis	0.979531	Adrenal_Gland	23.7593	8.02532e-16	1.34624	-2.74533	0.359847	-0.0433813	0.659304	2
ENSG00000173141.4	MRPL57	0.0461025	34	5	0.00607238	Artery_Tibial	0.5567	Small_Intestine_Terminal_Ileum	19.3369	4.90267e-16	0.834992	-0.58775	2.74385	2.07142	0.575771	5
ENSG00000184206.11	GOLGA6L4	0.0461495	37	4	0.004209	Brain_Hypothalamus	0.8634	Brain_Anterior_cingulate_cortex_BA24	17.3313	1.45589e-15	1.80417	-2.86206	1.77811	-0.273223	1.72524	4
ENSG00000156103.15	MMP16	0.0461923	44	4	0.009934	Breast_Mammary_Tissue	0.518915	Artery_Aorta	31.5565	2.59399e-15	1.20215	-2.57812	1.33006	-1.81279	0.623384	4
ENSG00000114738.10	MAPKAPK3	0.0462144	49	3	0.00033984	Spleen	0.915507	Stomach	25.5116	5.15964e-16	2.68021	-2.83134	3.58287	0.55445	1.85117	3
ENSG00000234948.1	LINC01524	0.04622	1	1	0.04622	Testis	0.04622	Testis	1	1	1	-1.99338	-1.99338	-1.99338	NA	1
ENSG00000155330.9	C16orf87	0.04626	4	1	0.04626	Adipose_Visceral_Omentum	0.04626	Adipose_Visceral_Omentum	4	2.92323e-32	4	1.99301	1.99301	1.99301	0	1
ENSG00000109118.13	PHF12	0.04627	1	1	0.04627	Cells_EBV-transformed_lymphocytes	0.04627	Cells_EBV-transformed_lymphocytes	1	1	1	1.99292	1.99292	1.99292	NA	1
ENSG00000251448.1	RP11-71E19.2	0.0463016	5	2	0.08605	Muscle_Skeletal	0.482742	Esophagus_Gastroesophageal_Junction	4.20483	8.35149e-18	0.795167	-1.71661	0.8167	-1.00701	1.11014	2
ENSG00000130313.6	PGLS	0.0465058	41	6	0.00271875	Testis	0.9792	Liver	24.7613	9.28496e-16	0.876779	-2.71894	2.99787	-0.36819	1.13462	6
ENSG00000230051.1	CTA-929C8.8	0.0465829	11	4	0.03923	Brain_Hippocampus	0.5774	Brain_Caudate_basal_ganglia	7.10668	2.45075e-17	0.592605	-0.868721	2.06177	0.882138	1.11512	4
ENSG00000131849.11	ZNF132	0.0465957	47	2	0.01391	Brain_Anterior_cingulate_cortex_BA24	0.6243	Brain_Cortex	42.2917	1.80089e-15	4.26376	-2.45958	1.34943	-2.1733	0.624265	2
ENSG00000166523.7	CLEC4E	0.046825	23	3	0.0954856	Nerve_Tibial	0.8679	Brain_Putamen_basal_ganglia	17.2488	8.58491e-18	1.24649	-1.55875	1.66714	0.721588	1.21759	3
ENSG00000196284.15	SUPT3H	0.0468304	47	3	0.0239829	Testis	0.9398	Artery_Aorta	34.6471	1.3602e-15	2.71169	-2.2574	1.79178	0.376663	1.18655	3
ENSG00000235007.2	RP11-344B5.4	0.046851	7	3	0.0150163	Ovary	0.9981	Brain_Caudate_basal_ganglia	5.81602	1.28399e-16	0.32263	-2.43199	-0.0023813	-1.0429	0.723468	3
ENSG00000152484.13	USP12	0.0468981	13	5	0.00209	Brain_Caudate_basal_ganglia	0.9565	Muscle_Skeletal	5.25073	4.59663e-17	0.306154	-3.07714	3.07714	0.116072	1.78141	5
ENSG00000173812.10	EIF1	0.04698	42	1	0.04698	Adipose_Subcutaneous	0.04698	Kidney_Cortex	42	7.79735e-16	42	-1.98648	1.98648	1.7027	1.0356	1
ENSG00000169684.13	CHRNA5	0.0470146	46	3	0.0247052	Minor_Salivary_Gland	0.580084	Esophagus_Muscularis	39.8619	5.2373e-16	2.28384	-2.20532	2.24598	1.52136	1.02326	3
ENSG00000048462.10	TNFRSF17	0.0470668	27	5	0.02049	Thyroid	0.885	Artery_Coronary	14.0793	3.86108e-16	0.665894	-2.18526	2.31725	0.481941	1.86818	5
ENSG00000225948.2	RP11-554I8.1	0.0471039	9	1	0.0269682	Muscle_Skeletal	0.162365	Brain_Cortex	8.78151	7.00413e-18	8.78151	-2.21198	-1.39716	-1.95847	0.252141	1
ENSG00000103932.11	RPAP1	0.0471181	48	2	0.0143078	Brain_Cerebellar_Hemisphere	0.3955	Brain_Spinal_cord_cervical_c-1	42.5785	1.08716e-15	2.35508	-2.44944	-0.849685	-1.76191	0.427689	2
ENSG00000158825.5	CDA	0.0472351	43	6	0.0002485	Liver	0.952005	Lung	28.2283	2.7613e-15	1.05761	-3.6638	3.62292	1.42293	1.3245	6
ENSG00000243716.10	NPIPB5	0.04729	1	1	0.04729	Cells_Cultured_fibroblasts	0.04729	Cells_Cultured_fibroblasts	1	1	1	-1.98369	-1.98369	-1.98369	NA	1
ENSG00000168159.11	RNF187	0.0472997	49	5	0.00164358	Brain_Putamen_basal_ganglia	0.980723	Spleen	29.245	1.18948e-15	2.61865	-3.14806	0.456542	-1.31911	0.865182	5
ENSG00000141699.10	FAM134C	0.0473017	18	3	0.07731	Muscle_Skeletal	0.7778	Adipose_Subcutaneous	9.14061	1.04976e-17	1.95988	-1.76651	1.76651	0.623384	1.06996	3
ENSG00000054116.11	TRAPPC3	0.0473372	42	3	0.00733149	Stomach	0.972355	Brain_Nucleus_accumbens_basal_ganglia	29.7561	2.15847e-15	1.21811	-1.90654	2.6814	1.11059	1.40172	3
ENSG00000256124.5	LINC01152	0.0473548	26	4	0.000429467	Brain_Anterior_cingulate_cortex_BA24	0.960054	Nerve_Tibial	15.6575	6.5656e-16	0.584317	-2.72528	3.52128	0.705334	2.3651	4
ENSG00000261672.1	RP11-475B2.1	0.0473961	25	2	0.009068	Artery_Tibial	0.626412	Ovary	22.4229	3.63726e-17	1.11959	-2.60948	-0.486783	-2.16303	0.513076	2
ENSG00000112053.13	SLC26A8	0.0474157	43	5	0.013032	Brain_Spinal_cord_cervical_c-1	0.992294	Artery_Aorta	23.9882	6.45028e-16	1.10255	-1.19393	2.48289	0.223729	1.225	5
ENSG00000251291.1	RP11-400D2.3	0.0474673	1	1	0.0474673	Testis	0.0474673	Testis	1	1	1	1.98211	1.98211	1.98211	NA	1
ENSG00000144034.14	TPRKB	0.0474776	49	2	0.02946	Kidney_Cortex	0.970917	Cells_Cultured_fibroblasts	43.5555	6.79523e-16	4.76052	-2.07161	2.17728	-0.268767	0.770865	2
ENSG00000205981.6	DNAJC19	0.04754	38	1	0.04754	Adipose_Visceral_Omentum	0.04754	Adrenal_Gland	38	3.74667e-15	38	-1.98146	1.98146	-1.56431	1.23251	1
ENSG00000105668.7	UPK1A	0.0475658	43	4	0.00300179	Brain_Anterior_cingulate_cortex_BA24	0.5755	Cells_Cultured_fibroblasts	31.755	5.20296e-16	1.51216	-2.96755	-0.55997	-2.2131	0.544237	4
ENSG00000059769.19	DNAJC25	0.0475699	44	3	0.0795	Brain_Amygdala	0.969626	Muscle_Skeletal	29.2486	6.44955e-16	1.06522	-1.19335	1.75359	0.979306	0.749227	3
ENSG00000174945.13	AMZ1	0.0475933	21	11	0.00117026	Lung	0.7844	Esophagus_Gastroesophageal_Junction	7.17747	3.3994e-17	0.344921	-3.24603	1.06098	-0.58622	1.01079	11
ENSG00000146592.16	CREB5	0.0476354	4	4	0.003155	Whole_Blood	0.7853	Brain_Cortex	1.39413	0.622754	0.622754	-2.95222	1.84822	-0.129584	2.01963	4
ENSG00000110395.6	CBL	0.0476523	42	3	0.07897	Vagina	0.949299	Small_Intestine_Terminal_Ileum	29.7982	4.32698e-16	3.78545	-1.75669	1.56749	-0.270676	0.945872	3
ENSG00000228792.2	RP11-354K1.2	0.04767	1	1	0.04767	Spleen	0.04767	Spleen	1	1	1	1.9803	1.9803	1.9803	NA	1
ENSG00000271320.1	RP11-1152H14.1	0.0476755	43	3	0.00361068	Brain_Cerebellum	0.998697	Artery_Tibial	36.8875	1.35507e-15	1.29272	-0.783898	2.91031	0.740163	0.475424	3
ENSG00000006047.12	YBX2	0.0476829	38	5	0.0341566	Cells_Cultured_fibroblasts	0.932026	Minor_Salivary_Gland	19.1759	4.74035e-16	0.70147	-2.11822	0.787773	-0.354439	1.13819	5
ENSG00000066294.14	CD84	0.047692	46	2	0.0078297	Heart_Left_Ventricle	0.3433	Testis	37.3978	1.15673e-15	6.9882	0.947665	2.65933	1.97476	0.451699	2
ENSG00000259611.1	LINC01582	0.0477012	1	1	0.0477012	Testis	0.0477012	Testis	1	1	1	-1.98002	-1.98002	-1.98002	NA	1
ENSG00000261390.5	MAFTRR	0.0478572	42	1	0.00545513	Heart_Atrial_Appendage	0.418114	Uterus	39.7581	6.63966e-16	39.7581	-2.77885	-0.809698	-1.92257	0.305196	1
ENSG00000250708.1	RP11-161D15.1	0.0479953	7	5	0.03633	Artery_Coronary	0.888001	Nerve_Tibial	4.44692	2.47763e-16	0.159384	-2.09321	1.32458	-0.63496	1.07601	5
ENSG00000257759.2	RP11-486O13.4	0.04804	1	1	0.04804	Testis	0.04804	Testis	1	1	1	1.97701	1.97701	1.97701	NA	1
ENSG00000070495.14	JMJD6	0.0480562	7	4	0.003762	Whole_Blood	0.1141	Spleen	5.4642	1.46827e-18	0.197843	-2.89746	2.40641	0.377416	2.29222	4
ENSG00000136936.10	XPA	0.0480956	40	2	0.02009	Brain_Amygdala	0.739	Esophagus_Gastroesophageal_Junction	31.2043	1.94002e-15	6.60931	-1.5763	2.32466	0.784406	1.00087	2
ENSG00000160349.9	LCN1	0.0481272	8	3	0.0162	Pituitary	0.5162	Brain_Anterior_cingulate_cortex_BA24	5.48512	7.01061e-17	0.691317	0.649214	2.40438	1.36914	0.774676	3
ENSG00000260588.1	RP11-930P14.2	0.0481529	44	5	0.02102	Pituitary	0.928916	Brain_Hippocampus	20.1692	6.18679e-16	0.904749	-2.30763	1.86744	-0.083715	1.51646	5
ENSG00000167178.15	ISLR2	0.0482095	19	5	0.08761	Testis	0.8967	Esophagus_Gastroesophageal_Junction	14.0184	3.18451e-18	0.587259	-1.61137	1.70814	0.31597	0.773522	5
ENSG00000180785.8	OR51E1	0.0482231	38	6	0.03292	Skin_Not_Sun_Exposed_Suprapubic	0.986867	Breast_Mammary_Tissue	21.5578	8.60171e-16	0.789381	-2.13306	1.45924	-0.418205	0.921316	6
ENSG00000133116.7	KL	0.0482799	39	6	0.03561	Artery_Tibial	0.9198	Whole_Blood	16.4837	1.0411e-15	0.97508	-1.66196	2.10135	-0.335228	0.929222	6
ENSG00000251580.1	RP11-539L10.3	0.0483206	49	2	0.00697324	Brain_Caudate_basal_ganglia	0.942068	Testis	42.1168	4.13158e-15	4.99982	0.0726706	2.69812	2.13248	0.419176	2
ENSG00000100593.17	ISM2	0.0483528	31	4	0.00530062	Brain_Putamen_basal_ganglia	0.989682	Testis	19.7391	4.77817e-16	0.659489	-1.58831	2.78817	0.905491	1.16876	4
ENSG00000168830.7	HTR1E	0.048363	18	3	0.124039	Thyroid	0.9848	Brain_Amygdala	9.55556	2.67483e-19	1.1514	-1.53804	1.43566	-0.105207	0.765774	3
ENSG00000109854.13	HTATIP2	0.0483746	48	2	0.0252533	Nerve_Tibial	0.9222	Lung	42.2994	1.52337e-15	4.2454	-2.23751	2.22962	-1.23409	1.50127	2
ENSG00000162367.11	TAL1	0.0484227	31	3	0.0218996	Nerve_Tibial	0.7964	Adipose_Visceral_Omentum	25.2999	1.87351e-15	1.9734	-0.910831	2.2921	-0.168848	0.872624	3
ENSG00000122986.13	HVCN1	0.0484366	47	1	0.00456	Whole_Blood	0.54991	Muscle_Skeletal	45.8845	1.63715e-15	45.8845	-1.9546	2.83658	1.19483	1.56712	1
ENSG00000148604.13	RGR	0.0484755	30	4	0.0422301	Brain_Spinal_cord_cervical_c-1	0.290977	Testis	22.4366	6.14139e-16	0.813451	-2.03125	1.29217	-1.36806	1.05844	4
ENSG00000178935.5	ZNF552	0.0485753	31	4	0.0107899	Colon_Transverse	0.459418	Brain_Cerebellum	19.7723	1.29157e-15	0.859768	-2.54943	2.46766	-0.352862	2.0156	4
ENSG00000140153.17	WDR20	0.0485945	14	3	0.01224	Spleen	0.7481	Adipose_Visceral_Omentum	9.95489	1.0188e-17	0.797517	-2.50515	0.804204	-1.55122	1.11928	3
ENSG00000152137.6	HSPB8	0.0486646	26	4	0.008133	Spleen	0.9856	Brain_Amygdala	12.6941	6.90179e-16	0.771736	-1.2233	2.6465	0.363414	0.853009	4
ENSG00000197245.5	FAM110D	0.0487306	47	2	0.01776	Brain_Nucleus_accumbens_basal_ganglia	0.591	Brain_Cortex	42.013	4.14488e-15	3.11824	0.537387	2.37058	1.21894	0.572421	2
ENSG00000204397.7	CARD16	0.0487476	17	4	0.04317	Brain_Hypothalamus	0.835487	Whole_Blood	9.64545	4.49623e-18	0.934862	-1.7569	2.02206	0.282774	1.45823	4
ENSG00000272130.1	RP11-360I2.1	0.0488019	27	2	0.1232	Thyroid	0.9961	Esophagus_Gastroesophageal_Junction	25.379	1.0162e-15	1.17621	-0.259093	1.54148	0.598568	0.608051	2
ENSG00000229206.3	RP11-397O4.1	0.0488636	2	2	0.03481	Brain_Cerebellar_Hemisphere	0.4655	Brain_Cerebellum	1.74407	0.255931	0.255931	-2.11056	-0.72982	-1.42019	0.976332	2
ENSG00000233393.1	AP000688.29	0.0489567	42	5	0.00682586	Testis	0.980446	Esophagus_Gastroesophageal_Junction	28.0498	2.61512e-15	1.1075	-2.70522	1.45347	-1.09012	1.14296	5
ENSG00000249743.5	RP11-60A8.1	0.0489617	5	3	0.00288198	Esophagus_Mucosa	0.7909	Brain_Cortex	2.79769	7.79353e-17	0.511901	-0.265142	2.98005	1.39191	1.31893	3
ENSG00000180332.6	KCTD4	0.0490511	36	2	0.01405	Adipose_Subcutaneous	0.7301	Prostate	23.1687	1.56348e-15	12.8313	-2.45598	2.45598	-1.44221	1.26232	2
ENSG00000150459.12	SAP18	0.0490838	34	3	0.01529	Artery_Aorta	1	Brain_Putamen_basal_ganglia	23.7358	6.43421e-16	1.72997	-1.1648	2.42544	0.179459	0.875536	3
ENSG00000170927.14	PKHD1	0.049084	7	6	0.0396527	Skin_Not_Sun_Exposed_Suprapubic	0.8098	Pancreas	2.99253	0.00896331	0.101366	-1.23428	2.05735	0.403332	1.26604	6
ENSG00000142507.9	PSMB6	0.0491058	19	4	0.02746	Nerve_Tibial	0.5281	Heart_Left_Ventricle	16.0259	3.04452e-18	0.780839	-2.20492	2.20492	1.51693	1.47741	4
ENSG00000176571.11	CNBD1	0.04913	1	1	0.04913	Spleen	0.04913	Spleen	1	1	1	1.96746	1.96746	1.96746	NA	1
ENSG00000184900.15	SUMO3	0.0491593	42	8	0.001283	Nerve_Tibial	0.985531	Brain_Hypothalamus	20.3999	1.92526e-15	0.708147	-1.3201	3.21976	0.827025	0.997804	8
ENSG00000023892.10	DEF6	0.0491689	47	3	0.00804362	Lung	0.700878	Liver	31.6934	8.83338e-16	5.88088	-2.65023	0.886961	-1.43323	0.858404	3
ENSG00000225548.5	LINC01980	0.0492134	1	1	0.0492134	Testis	0.0492134	Testis	1	1	1	-1.96674	-1.96674	-1.96674	NA	1
ENSG00000089902.9	RCOR1	0.0492352	42	5	0.00200688	Artery_Aorta	0.9131	Adrenal_Gland	27.8102	6.13312e-16	0.942444	-3.08921	1.23508	-0.958846	1.28282	5
ENSG00000205835.8	GMNC	0.0493835	3	2	0.02142	Brain_Caudate_basal_ganglia	0.3613	Pancreas	2.00147	1.57544e-16	0.998534	-2.3005	2.3005	-0.304297	2.3601	2
ENSG00000233237.6	LINC00472	0.0494605	37	4	0.005317	Esophagus_Muscularis	0.882759	Cells_Cultured_fibroblasts	24.5805	3.96127e-16	0.838448	-2.78717	1.70565	0.663729	1.33616	4
ENSG00000198739.10	LRRTM3	0.0495011	20	6	0.0349724	Esophagus_Muscularis	0.6033	Brain_Cerebellum	13.4512	5.55863e-18	0.546879	-2.10868	1.35127	-0.488881	1.1292	6
ENSG00000266028.7	SRGAP2	0.04959	1	1	0.04959	Artery_Aorta	0.04959	Artery_Aorta	1	1	1	1.96348	1.96348	1.96348	NA	1
ENSG00000258785.5	LINC01580	0.0496057	1	1	0.0496057	Testis	0.0496057	Testis	1	1	1	1.96335	1.96335	1.96335	NA	1
ENSG00000179085.7	DPM3	0.0496305	47	1	0.04864	Artery_Tibial	0.1324	Brain_Caudate_basal_ganglia	46.6301	2.76261e-15	46.6301	-1.97173	-1.5047	-1.95438	0.0759374	1
ENSG00000005059.15	MCUB	0.0496357	16	6	0.04486	Esophagus_Mucosa	0.6864	Nerve_Tibial	6.17411	1.19594e-17	0.421812	-2.00596	1.84657	-0.225425	1.13366	6
ENSG00000175701.10	LINC00116	0.04966	2	1	0.04966	Colon_Sigmoid	0.04966	Colon_Sigmoid	2	0	2	-1.96288	-1.96288	-1.96288	0	1
ENSG00000152766.5	ANKRD22	0.0496651	39	9	0.08471	Skin_Sun_Exposed_Lower_leg	0.905035	Adipose_Subcutaneous	17.3149	1.62346e-15	0.586294	-1.52323	1.72399	0.166735	1.07921	9
ENSG00000197241.3	SLC2A7	0.04972	1	1	0.04972	Testis	0.04972	Testis	1	1	1	-1.96237	-1.96237	-1.96237	NA	1
ENSG00000132017.10	DCAF15	0.0497748	14	4	0.004327	Prostate	0.966062	Heart_Atrial_Appendage	7.42698	3.15368e-19	0.979404	-2.85328	1.30704	0.067249	1.17366	4
ENSG00000179041.3	RRS1	0.0498029	34	3	0.00744836	Skin_Not_Sun_Exposed_Suprapubic	0.726274	Prostate	16.6869	3.59601e-16	7.88635	-2.10101	2.6761	0.430486	1.37073	3
ENSG00000172179.11	PRL	0.0498035	5	4	0.007759	Nerve_Tibial	0.7511	Pancreas	2.48737	5.3411e-17	0.21769	-2.66238	1.14213	-0.232414	1.45356	4
ENSG00000102606.17	ARHGEF7	0.0500072	47	4	0.0304818	Artery_Coronary	0.995466	Adipose_Visceral_Omentum	37.6737	3.71324e-15	1.5069	-2.16377	0.241458	-0.352541	0.720419	4
ENSG00000165555.9	NOXRED1	0.0500852	48	3	0.00310919	Whole_Blood	0.3368	Brain_Spinal_cord_cervical_c-1	38.6347	2.37033e-15	1.99525	0.960507	2.95673	2.26352	0.64542	3
ENSG00000161847.13	RAVER1	0.0501105	45	5	0.0124889	Lung	0.909718	Brain_Putamen_basal_ganglia	30.1823	6.37337e-16	1.30882	-2.49802	1.30254	-0.717291	0.9573	5
ENSG00000183161.4	FANCF	0.0501215	48	3	0.00501624	Colon_Transverse	0.7567	Brain_Cortex	39.3647	7.77486e-16	1.53011	-1.01313	2.80599	1.94096	0.711192	3
ENSG00000168096.14	ANKS3	0.0501402	29	3	0.07397	Testis	0.663	Artery_Coronary	25.7995	6.33771e-16	0.92655	-1.7868	1.68863	0.87695	1.37416	3
ENSG00000163428.3	LRRC58	0.0501848	45	4	0.00822126	Pituitary	0.9935	Cells_EBV-transformed_lymphocytes	27.366	7.93442e-16	0.916139	-2.64285	1.27721	-0.89643	1.04241	4
ENSG00000197208.5	SLC22A4	0.0504037	35	3	0.0150423	Brain_Cortex	0.929541	Artery_Aorta	30.5624	6.03881e-16	1.12243	-1.09572	2.43136	0.492707	1.11681	3
ENSG00000115392.11	FANCL	0.0504602	49	3	0.0563327	Esophagus_Gastroesophageal_Junction	0.9742	Brain_Cerebellar_Hemisphere	36.5062	6.84524e-16	1.2893	-1.90845	1.49621	-0.376847	0.549561	3
ENSG00000217442.3	SYCE3	0.0505231	30	2	0.142722	Brain_Cortex	0.877463	Brain_Cerebellum	27.895	1.23046e-15	1.00639	-1.46573	0.93292	-0.661945	0.461564	2
ENSG00000265817.2	FSBP	0.0505547	15	4	0.08224	Cells_Cultured_fibroblasts	0.9245	Breast_Mammary_Tissue	9.11675	8.21174e-18	0.405246	-1.73783	1.73783	0.635377	1.14333	4
ENSG00000256269.7	HMBS	0.0505576	45	5	0.00866987	Esophagus_Muscularis	0.9431	Brain_Hippocampus	31.6043	6.16763e-16	1.66052	-1.12027	2.6248	1.71375	0.916883	5
ENSG00000069849.10	ATP1B3	0.0505634	42	5	0.006873	Adipose_Visceral_Omentum	0.995922	Cells_Cultured_fibroblasts	23.0001	6.1766e-16	1.98188	-2.70294	0.654174	-0.186694	0.852321	5
ENSG00000163634.11	THOC7	0.0506471	47	6	0.000588708	Testis	0.962424	Cells_Cultured_fibroblasts	20.2008	5.84023e-16	1.10332	-3.43676	2.0696	-1.55897	1.15493	6
ENSG00000227036.6	LINC00511	0.0506975	19	4	0.0335	Testis	0.89892	Brain_Amygdala	16.1611	6.51858e-19	0.830325	-2.12604	0.127025	-1.33278	0.431568	4
ENSG00000255221.3	CARD17	0.0507218	9	2	0.0951999	Lung	0.677452	Testis	6.79994	2.91846e-17	1.96013	-1.52164	1.66858	-0.482214	1.25645	2
ENSG00000250237.1	CTC-498J12.1	0.0507413	10	3	0.005578	Adrenal_Gland	0.939077	Brain_Substantia_nigra	5.56139	9.20863e-18	0.968073	-0.257361	2.77161	1.75231	1.18309	3
ENSG00000161849.3	KRT84	0.0507951	3	2	0.01699	Testis	0.106	Skin_Not_Sun_Exposed_Suprapubic	2.35464	2.15378e-16	0.645364	1.61644	2.38692	1.87327	0.444841	2
ENSG00000153560.11	UBP1	0.0508057	48	3	0.01063	Esophagus_Gastroesophageal_Junction	0.954748	Nerve_Tibial	25.1253	1.04009e-15	6.26467	-2.55463	1.36003	0.272724	1.17714	3
ENSG00000189157.13	FAM47E	0.0508467	39	4	0.00339924	Brain_Spinal_cord_cervical_c-1	0.7118	Vagina	31.1913	3.0621e-15	1.45977	-2.92912	0.36944	-2.14387	0.832916	4
ENSG00000126790.11	L3HYPDH	0.0508523	49	2	0.0188737	Heart_Atrial_Appendage	0.996954	Brain_Hypothalamus	41.6351	4.10602e-15	3.93533	-2.34802	1.27247	0.117202	0.781822	2
ENSG00000153066.12	TXNDC11	0.0510235	49	4	0.00513496	Brain_Anterior_cingulate_cortex_BA24	0.844597	Brain_Putamen_basal_ganglia	29.7577	2.16681e-15	2.53518	-2.55369	2.79844	-1.04024	1.37402	4
ENSG00000248359.1	CTC-537E7.2	0.0510277	4	1	0.04489	Testis	0.06698	Prostate	3.89627	6.00957e-17	3.89627	-2.00568	1.93191	-0.959373	1.92884	1
ENSG00000183773.15	AIFM3	0.0510907	26	12	0.0632598	Colon_Transverse	0.9441	Artery_Coronary	6.97809	4.46327e-16	0.286665	-1.85736	0.985253	-0.216617	0.891695	12
ENSG00000137872.16	SEMA6D	0.0510978	8	8	0.04552	Brain_Cerebellum	0.9334	Ovary	2.33759	0.340201	0.340201	-1.99982	0.902107	-0.618074	1.13699	8
ENSG00000174721.9	FGFBP3	0.0511347	46	3	0.0079476	Skin_Not_Sun_Exposed_Suprapubic	0.140568	Thyroid	40.999	9.46652e-16	1.47552	1.47368	2.65429	1.96611	0.391888	3
ENSG00000160695.14	VPS11	0.0511847	48	2	0.0164507	Heart_Atrial_Appendage	0.977687	Nerve_Tibial	34.8716	3.42828e-15	12.3748	-1.74028	2.39876	0.361024	1.21477	2
ENSG00000230021.8	RP5-857K21.4	0.05123	1	1	0.05123	Testis	0.05123	Testis	1	1	1	1.94955	1.94955	1.94955	NA	1
ENSG00000008130.15	NADK	0.0513044	43	7	0.03523	Cells_Cultured_fibroblasts	0.9601	Brain_Anterior_cingulate_cortex_BA24	18.4363	5.47848e-16	0.714916	-2.1057	1.8589	-0.0894935	0.844695	7
ENSG00000042317.16	SPATA7	0.0514145	45	4	0.00214722	Artery_Tibial	0.941658	Thyroid	28.0436	2.72446e-15	1.70258	-1.88021	3.06908	0.269761	1.50689	4
ENSG00000134452.19	FBXO18	0.0516537	45	5	0.000499931	Thyroid	0.831879	Brain_Cerebellar_Hemisphere	29.8932	2.89641e-15	1.05331	-3.48079	-0.212292	-2.17242	0.719061	5
ENSG00000164520.11	RAET1E	0.0517032	30	2	0.00769835	Esophagus_Mucosa	0.04882	Kidney_Cortex	27.2964	6.2421e-16	2.51306	-2.66502	2.16521	1.4311	1.46444	2
ENSG00000132970.12	WASF3	0.0517112	40	6	0.0373128	Muscle_Skeletal	0.961792	Kidney_Cortex	19.6543	1.51649e-15	0.694775	-1.86487	2.08233	-0.0934395	1.02215	6
ENSG00000188778.5	ADRB3	0.0517537	5	2	0.01528	Colon_Transverse	0.04877	Brain_Frontal_Cortex_BA9	4.77389	6.39514e-17	0.226114	-2.42567	1.9706	-1.54642	1.96607	2
ENSG00000237484.5	LINC01684	0.0517923	7	5	0.04309	Lung	0.9823	Artery_Coronary	3.35349	3.95133e-17	0.477065	-0.913081	2.02284	0.131593	0.994867	5
ENSG00000174327.6	SLC16A13	0.0518492	37	6	0.02493	Lung	0.968597	Nerve_Tibial	24.3333	1.80228e-15	0.931542	-1.05703	2.24249	0.512301	1.03581	6
ENSG00000173442.12	EHBP1L1	0.0518904	27	6	0.002516	Cells_Cultured_fibroblasts	0.986526	Lung	14.6568	1.40874e-15	0.581243	-3.02141	0.70582	-1.55413	1.03962	6
ENSG00000101213.6	PTK6	0.0518995	35	6	0.08543	Skin_Sun_Exposed_Lower_leg	0.9839	Brain_Cortex	21.9864	6.41047e-16	1.00007	-1.23858	1.72001	-0.216432	0.811991	6
ENSG00000226207.1	RP1-104O17.3	0.05195	5	1	0.05195	Brain_Amygdala	0.05195	Brain_Caudate_basal_ganglia	5	1.44415e-17	5	-1.94355	-1.94355	-1.94355	2.48253e-16	1
ENSG00000049883.14	PTCD2	0.0519706	2	2	0.02593	Thyroid	0.5127	Skin_Sun_Exposed_Lower_leg	1.14016	0.859836	0.859836	-2.22726	0.654639	-0.78631	2.03781	2
ENSG00000181625.17	SLX1B	0.0519779	3	2	0.07324	Spleen	0.1328	Thyroid	1.97531	0.0521375	0.972553	-1.79133	1.50315	-0.632724	1.85194	2
ENSG00000260673.1	RP4-529N6.2	0.0519841	2	1	0.04413	Skin_Not_Sun_Exposed_Suprapubic	0.069123	Skin_Sun_Exposed_Lower_leg	1.94272	0.0572825	1.94272	-2.01285	-1.81762	-1.91523	0.138055	1
ENSG00000135521.8	LTV1	0.052028	11	5	0.06673	Brain_Nucleus_accumbens_basal_ganglia	0.81825	Prostate	4.7737	2.69563e-33	0.797333	-1.81243	1.83349	-0.0949986	1.27358	5
ENSG00000138778.11	CENPE	0.0520436	42	2	0.0128978	Brain_Substantia_nigra	0.9058	Stomach	36.6628	7.06925e-16	4.32001	-2.48658	1.79408	-1.97329	1.07946	2
ENSG00000269667.1	RP11-542M13.2	0.0522065	3	3	0.0131433	Colon_Transverse	0.842502	Small_Intestine_Terminal_Ileum	2.31655	0.122312	0.122312	-2.47986	-0.198694	-1.05179	1.24454	3
ENSG00000167925.15	GHDC	0.05223	2	1	0.05223	Brain_Nucleus_accumbens_basal_ganglia	0.05223	Brain_Frontal_Cortex_BA9	2	0	2	1.94123	1.94123	1.94123	3.14018e-16	1
ENSG00000125384.6	PTGER2	0.0522324	46	3	0.01248	Brain_Cerebellum	0.9967	Cells_EBV-transformed_lymphocytes	32.8767	1.26286e-15	1.43299	-2.49827	1.31117	-1.32443	0.923069	3
ENSG00000170846.16	AC093323.3	0.0522992	43	4	0.00886412	Kidney_Cortex	0.98993	Cells_EBV-transformed_lymphocytes	23.8735	1.77496e-15	1.89383	-2.52774	2.61725	-0.38834	1.30291	4
ENSG00000105127.8	AKAP8	0.0523154	19	4	0.006866	Heart_Left_Ventricle	0.9776	Uterus	15.0498	3.68782e-18	0.886903	-1.31891	2.70327	-0.227692	1.17235	4
ENSG00000085662.13	AKR1B1	0.0523539	42	7	0.004883	Thyroid	0.953774	Adrenal_Gland	17.423	8.23704e-16	0.64764	-2.81465	2.10975	-0.335787	1.09576	7
ENSG00000123737.12	EXOSC9	0.0523543	46	3	0.0178361	Heart_Left_Ventricle	0.32316	Cells_Cultured_fibroblasts	25.3177	4.36982e-16	2.44939	-2.369	1.92015	-0.031464	1.43086	3
ENSG00000085265.10	FCN1	0.0523713	47	3	0.0276459	Brain_Frontal_Cortex_BA9	0.985008	Prostate	31.6174	6.23779e-16	3.90348	-2.20228	1.6856	-1.09833	0.959135	3
ENSG00000223634.1	AC012506.3	0.0524	1	1	0.0524	Testis	0.0524	Testis	1	1	1	-1.93983	-1.93983	-1.93983	NA	1
ENSG00000182973.18	CNOT10	0.0524038	48	3	0.0455791	Spleen	0.896154	Skin_Sun_Exposed_Lower_leg	38.6597	7.88954e-16	3.33657	-1.99927	1.92244	-1.24792	1.14778	3
ENSG00000178078.11	STAP2	0.0524172	49	6	0.00478393	Colon_Transverse	0.899881	Minor_Salivary_Gland	28.8183	5.8953e-16	0.969703	-2.82123	1.96323	0.188641	1.22523	6
ENSG00000115425.13	PECR	0.0524259	34	9	0.00768318	Esophagus_Mucosa	0.99354	Lung	11.3202	4.96253e-16	0.416476	-2.66568	1.63762	-0.379948	0.958836	9
ENSG00000278743.1	RP11-707G18.1	0.0524474	42	3	0.01111	Brain_Caudate_basal_ganglia	0.961848	Uterus	35.0606	1.1743e-15	1.17939	-2.53922	0.874277	-0.499616	0.628829	3
ENSG00000126368.5	NR1D1	0.052528	29	3	0.01421	Whole_Blood	0.9387	Adrenal_Gland	16.2658	4.70233e-16	1.23438	-2.45191	-0.0769039	-0.831993	0.621981	3
ENSG00000018236.14	CNTN1	0.0525323	36	4	0.017938	Nerve_Tibial	0.777621	Brain_Anterior_cingulate_cortex_BA24	23.4393	2.17341e-15	1.18206	-2.36689	2.11629	-0.948624	1.69815	4
ENSG00000259974.2	LINC00261	0.0526188	7	3	0.1145	Lung	0.9989	Brain_Substantia_nigra	5.85548	2.94257e-20	0.296991	-0.31258	1.57829	0.17983	0.627472	3
ENSG00000269404.6	SPIB	0.0526443	20	4	0.01185	Artery_Coronary	0.3333	Liver	13.027	2.78236e-18	0.950474	-2.51658	2.51658	1.24038	1.75118	4
ENSG00000271265.1	RP11-230C9.4	0.0526596	37	3	0.0159132	Pituitary	0.8686	Artery_Coronary	29.6004	2.07944e-15	3.26574	-0.583584	2.4109	1.80908	0.974892	3
ENSG00000277399.4	GPR179	0.0527305	34	2	0.1333	Artery_Tibial	0.8921	Small_Intestine_Terminal_Ileum	30.9074	1.66057e-15	2.60738	-1.50121	1.50121	0.00979042	1.20295	2
ENSG00000215866.7	LINC01356	0.0527667	25	3	0.02418	Brain_Substantia_nigra	0.857401	Thyroid	22.0635	7.54514e-19	0.940306	-2.25426	0.892415	-1.87114	0.714642	3
ENSG00000103174.11	NAGPA	0.0527818	44	5	0.00148144	Liver	0.956108	Brain_Spinal_cord_cervical_c-1	31.4459	3.08952e-15	1.63823	-1.08663	3.17829	1.37967	0.842926	5
ENSG00000278540.4	ACACA	0.0527999	24	4	0.006765	Esophagus_Gastroesophageal_Junction	0.6	Pancreas	16.9843	1.88484e-18	1.05243	-2.7082	1.20656	-0.786636	0.759335	4
ENSG00000256001.1	RP11-575F12.2	0.0528083	25	6	0.0138887	Cells_Cultured_fibroblasts	0.921374	Adipose_Visceral_Omentum	10.8134	2.15924e-18	0.552662	-2.46013	2.36043	-0.217242	1.82029	6
ENSG00000108515.17	ENO3	0.052867	43	4	0.1218	Prostate	0.979421	Lung	32.613	3.12375e-15	1.76887	-0.792932	1.54726	0.0215166	0.765344	4
ENSG00000161860.7	SYCE2	0.0528799	35	4	0.0898224	Cells_EBV-transformed_lymphocytes	0.996545	Lung	25.8204	6.26809e-16	1.10454	-1.69634	1.63762	0.0253483	1.00865	4
ENSG00000237422.1	RP11-305L7.3	0.0529112	2	2	0.01782	Nerve_Tibial	0.5753	Brain_Cerebellum	1.01943	0.980568	0.980568	-2.36934	0.560263	-0.904537	2.07154	2
ENSG00000169862.18	CTNND2	0.0529206	18	6	0.0317	Pancreas	0.662365	Liver	7.79443	1.09463e-17	0.390592	-2.14817	2.14817	0.980232	1.56592	6
ENSG00000143106.12	PSMA5	0.0529287	16	4	0.0792449	Liver	0.967014	Heart_Atrial_Appendage	9.42626	7.96314e-18	0.470368	-1.16604	1.75508	-0.095006	1.05415	4
ENSG00000162511.7	LAPTM5	0.0529359	39	3	0.0148693	Muscle_Skeletal	0.892834	Heart_Left_Ventricle	28.4135	1.58008e-15	2.82803	-2.18458	2.43555	0.301345	1.01412	3
ENSG00000155868.7	MED7	0.0529435	22	3	0.1578	Colon_Transverse	0.8514	Kidney_Cortex	14.1051	1.77676e-18	0.538777	-1.41251	0.90079	-0.0157658	0.773159	3
ENSG00000282849.1	RP11-121P12.1	0.05295	1	1	0.05295	Cells_Cultured_fibroblasts	0.05295	Cells_Cultured_fibroblasts	1	1	1	1.93533	1.93533	1.93533	NA	1
ENSG00000134864.10	GGACT	0.0529517	47	2	0.005613	Brain_Caudate_basal_ganglia	0.976324	Pancreas	43.2138	6.60843e-16	2.4797	-2.76957	0.592291	-0.356045	0.738681	2
ENSG00000184752.12	NDUFA12	0.0529892	41	5	0.01163	Colon_Transverse	0.4666	Adipose_Subcutaneous	27.794	2.65507e-15	1.66942	-1.61922	2.52318	0.910142	1.14887	5
ENSG00000120915.13	EPHX2	0.0530157	48	3	0.0614372	Brain_Nucleus_accumbens_basal_ganglia	0.982668	Cells_Cultured_fibroblasts	41.5811	9.55868e-16	1.83201	-1.87034	1.19394	-0.582763	0.878394	3
ENSG00000136144.11	RCBTB1	0.0530538	49	3	0.00229	Testis	0.741024	Skin_Not_Sun_Exposed_Suprapubic	35.7783	2.27618e-15	3.91286	-3.04979	1.25144	-1.7182	0.735638	3
ENSG00000182612.10	TSPAN10	0.0530845	46	3	0.00468745	Brain_Amygdala	0.658691	Esophagus_Muscularis	27.3077	1.04345e-15	4.48149	-0.853829	2.82776	1.48277	0.962009	3
ENSG00000198604.10	BAZ1A	0.053089	13	7	0.06526	Pancreas	0.8724	Liver	3.38668	8.03557e-33	0.484522	-1.84347	1.84347	0.369279	1.42496	7
ENSG00000088756.12	ARHGAP28	0.0531086	34	7	0.005305	Minor_Salivary_Gland	0.918219	Skin_Sun_Exposed_Lower_leg	21.3478	7.80486e-16	0.841186	-1.02513	2.78791	0.131038	0.785329	7
ENSG00000130762.14	ARHGEF16	0.0531168	46	3	0.00999655	Heart_Left_Ventricle	0.9436	Thyroid	29.856	4.80173e-16	1.21771	-2.57595	1.59193	-1.17811	0.968654	3
ENSG00000164128.6	NPY1R	0.0531403	37	6	0.02962	Artery_Aorta	0.9601	Brain_Spinal_cord_cervical_c-1	24.1232	8.10258e-16	0.864351	-2.17514	2.17514	0.989019	1.53845	6
ENSG00000267147.2	LINC01842	0.0531615	12	3	0.008273	Spleen	0.777588	Brain_Putamen_basal_ganglia	8.47371	8.71011e-18	1.04507	-0.751586	2.64072	0.858366	0.996263	3
ENSG00000253321.1	RP11-61G23.2	0.0532	1	1	0.0532	Brain_Frontal_Cortex_BA9	0.0532	Brain_Frontal_Cortex_BA9	1	1	1	1.93329	1.93329	1.93329	NA	1
ENSG00000131737.5	KRT34	0.0534163	6	4	0.0118821	Esophagus_Mucosa	0.739294	Brain_Cerebellar_Hemisphere	3.21987	8.79825e-17	0.337967	-2.51563	2.23011	-0.764923	1.736	4
ENSG00000184182.18	UBE2F	0.0534585	45	2	0.00141336	Whole_Blood	0.956468	Thyroid	35.3215	5.32889e-16	7.85815	-3.19191	0.081677	-1.96838	0.797437	2
ENSG00000167792.11	NDUFV1	0.053557	47	2	0.0339625	Small_Intestine_Terminal_Ileum	0.4919	Prostate	43.055	5.50866e-16	1.47464	-2.12052	-0.68729	-1.72037	0.395422	2
ENSG00000163808.16	KIF15	0.0535809	45	2	0.01619	Artery_Aorta	0.954819	Brain_Cerebellar_Hemisphere	42.159	1.36254e-15	1.67771	-2.4046	0.056656	-2.2073	0.550352	2
ENSG00000149403.12	GRIK4	0.0535968	18	12	0.01287	Adrenal_Gland	0.8798	Whole_Blood	4.66864	2.09823e-17	0.203839	-2.48735	2.14217	0.239868	1.6161	12
ENSG00000205426.10	KRT81	0.0536303	39	6	0.0281937	Muscle_Skeletal	0.992444	Cells_EBV-transformed_lymphocytes	17.5684	5.37369e-16	0.802206	-1.73874	2.19458	0.193958	1.31663	6
ENSG00000233945.1	RP11-344L13.2	0.05364	1	1	0.05364	Testis	0.05364	Testis	1	1	1	1.92973	1.92973	1.92973	NA	1
ENSG00000258777.1	HIF1A-AS1	0.0537	1	1	0.0537	Brain_Frontal_Cortex_BA9	0.0537	Brain_Frontal_Cortex_BA9	1	1	1	-1.92925	-1.92925	-1.92925	NA	1
ENSG00000244411.3	KRTAP5-7	0.0537299	16	5	0.004642	Testis	0.5272	Adipose_Subcutaneous	9.82496	9.328e-19	0.35695	-2.83088	2.094	-0.393596	1.4793	5
ENSG00000164061.4	BSN	0.0537355	6	4	0.008467	Colon_Transverse	0.8946	Cells_Cultured_fibroblasts	3.36651	4.46162e-17	0.153298	-2.63286	0.241716	-0.939818	1.33836	4
ENSG00000132510.10	KDM6B	0.0537411	24	3	0.0143001	Nerve_Tibial	0.5543	Adipose_Visceral_Omentum	18.1097	8.60148e-19	0.935966	-2.44963	0.613267	-1.64103	1.1833	3
ENSG00000226992.1	AC144525.1	0.0538156	1	1	0.0538156	Cells_Cultured_fibroblasts	0.0538156	Cells_Cultured_fibroblasts	1	1	1	-1.92832	-1.92832	-1.92832	NA	1
ENSG00000240849.10	TMEM189	0.0538327	28	3	0.0319843	Brain_Cerebellum	0.9426	Artery_Coronary	22.6963	4.80377e-16	0.832307	-2.14461	2.05324	-0.00137833	1.66854	3
ENSG00000166145.14	SPINT1	0.0538697	39	3	0.004916	Artery_Tibial	0.903632	Whole_Blood	27.1814	4.7186e-16	1.08301	-2.81249	2.57986	-1.26162	1.78215	3
ENSG00000100982.11	PCIF1	0.0538913	47	5	0.01533	Adrenal_Gland	0.710813	Whole_Blood	21.7599	6.90843e-16	1.32791	-2.42449	2.209	0.313267	0.94462	5
ENSG00000250366.2	TUNAR	0.0539772	14	6	0.009688	Brain_Hypothalamus	0.9876	Artery_Aorta	9.49736	3.13312e-18	0.507727	-2.58677	0.893667	0.0787207	1.08142	6
ENSG00000124641.15	MED20	0.0539989	48	2	0.00314922	Cells_Cultured_fibroblasts	0.1417	Muscle_Skeletal	45.4112	6.37034e-16	1.78521	1.46949	2.95278	2.32911	0.228336	2
ENSG00000109787.12	KLF3	0.0541386	36	2	0.02467	Adrenal_Gland	0.6856	Vagina	33.1391	5.11826e-16	2.01658	-2.24653	2.24653	-0.758661	2.05913	2
ENSG00000126773.12	PCNX4	0.0541387	48	4	0.0613619	Brain_Putamen_basal_ganglia	0.997921	Adipose_Subcutaneous	33.8748	2.97444e-15	1.77626	-1.76409	1.87088	0.207247	0.935695	4
ENSG00000164687.10	FABP5	0.054166	15	4	0.07032	Esophagus_Muscularis	0.2021	Skin_Sun_Exposed_Lower_leg	7.09959	6.60675e-33	0.856927	-1.80984	1.80984	0.652842	1.46897	4
ENSG00000185386.14	MAPK11	0.0541749	44	7	0.07818	Brain_Amygdala	0.9811	Artery_Aorta	16.9109	9.27739e-16	0.891723	-1.37156	1.76135	0.323761	0.873886	7
ENSG00000271751.1	RP11-110I1.14	0.0541929	46	2	0.04852	Pancreas	0.7392	Brain_Amygdala	38.7779	3.12948e-15	5.63994	-1.97279	1.09837	-0.508371	1.03948	2
ENSG00000122705.16	CLTA	0.0541929	48	3	0.00627	Brain_Cortex	0.980995	Adipose_Visceral_Omentum	27.9382	5.84188e-16	8.73476	-2.73332	1.17975	-0.645401	1.18821	3
ENSG00000099953.9	MMP11	0.0542031	38	4	0.230894	Colon_Sigmoid	0.698981	Brain_Putamen_basal_ganglia	28.7579	3.60199e-16	1.24667	-1.17233	1.19806	0.613163	0.681059	4
ENSG00000256538.1	RP11-847H18.3	0.0543107	5	4	0.353	Adipose_Subcutaneous	0.8433	Breast_Mammary_Tissue	2.72813	4.49492e-19	0.0963928	-0.928786	0.715176	-0.0543075	0.622771	4
ENSG00000071655.17	MBD3	0.0543225	43	1	0.0376636	Colon_Sigmoid	0.885819	Brain_Amygdala	40.2838	1.04094e-15	40.2838	-2.0785	1.25137	-1.79005	0.589349	1
ENSG00000224877.3	NDUFAF8	0.0544974	49	3	0.00477804	Brain_Caudate_basal_ganglia	0.945324	Colon_Transverse	33.7856	1.58336e-15	1.45071	-2.82163	0.275533	-2.0556	0.665457	3
ENSG00000261039.2	RP11-417E7.2	0.0545598	15	2	0.0179054	Spleen	0.374105	Lung	13.6414	5.24856e-17	1.05887	-2.36757	-0.88881	-1.84342	0.423108	2
ENSG00000075891.21	PAX2	0.05456	1	1	0.05456	Kidney_Cortex	0.05456	Kidney_Cortex	1	1	1	-1.92236	-1.92236	-1.92236	NA	1
ENSG00000183813.6	CCR4	0.0545632	10	3	0.06793	Esophagus_Mucosa	0.2742	Testis	7.24836	2.43189e-17	0.964185	-1.82547	1.09344	-1.3883	0.922813	3
ENSG00000164690.7	SHH	0.0546315	20	8	0.0257601	Skin_Not_Sun_Exposed_Suprapubic	0.7903	Adrenal_Gland	12.9502	3.58432e-17	0.474099	-2.14529	2.22981	0.0736505	0.961161	8
ENSG00000143442.21	POGZ	0.054675	49	1	0.02712	Muscle_Skeletal	0.4769	Brain_Anterior_cingulate_cortex_BA24	47.8265	7.9131e-16	47.8265	0.711297	2.20979	1.89327	0.276113	1
ENSG00000279668.2	CTC-304I17.6	0.0546984	16	7	0.0100282	Heart_Left_Ventricle	0.9494	Skin_Sun_Exposed_Lower_leg	9.71171	1.77019e-17	0.435159	-2.57485	0.342488	-0.374021	0.84422	7
ENSG00000169860.6	P2RY1	0.0547225	43	5	0.009872	Thyroid	0.676995	Brain_Spinal_cord_cervical_c-1	25.0846	5.36998e-16	0.881327	-2.58028	2.28618	-0.279074	1.31877	5
ENSG00000170379.19	TCAF2	0.0547409	14	3	0.0522902	Thyroid	0.6811	Adipose_Subcutaneous	12.0605	2.1708e-18	0.415908	0.410963	1.94074	1.33945	0.622279	3
ENSG00000107560.10	RAB11FIP2	0.0548547	45	3	0.0139111	Brain_Hippocampus	0.823907	Ovary	28.9905	6.18636e-16	1.72264	-0.595963	2.45955	1.28152	1.09919	3
ENSG00000144355.14	DLX1	0.0549743	38	4	0.00595313	Ovary	0.988043	Adrenal_Gland	24.3397	5.05279e-16	0.922235	-2.75035	1.74396	-0.0606098	0.696962	4
ENSG00000251326.1	RP11-521E5.1	0.05498	1	1	0.05498	Testis	0.05498	Testis	1	1	1	-1.91903	-1.91903	-1.91903	NA	1
ENSG00000009709.11	PAX7	0.0549844	5	2	0.03102	Brain_Cortex	0.4058	Muscle_Skeletal	4.01568	8.72688e-17	0.984319	0.831307	2.15682	1.09641	0.592785	2
ENSG00000198265.11	HELZ	0.0550223	45	3	0.01752	Brain_Cortex	0.974623	Cells_EBV-transformed_lymphocytes	23.758	2.31652e-15	1.48635	-2.37561	1.657	0.485571	0.802255	3
ENSG00000100385.13	IL2RB	0.0550365	7	3	0.1048	Esophagus_Mucosa	0.4411	Cells_EBV-transformed_lymphocytes	3.79328	5.33117e-34	0.385621	-0.920522	1.62202	0.879686	0.893315	3
ENSG00000248809.5	LINC01095	0.05506	4	1	0.05506	Heart_Atrial_Appendage	0.05506	Artery_Tibial	4	2.04137e-32	4	-1.9184	1.9184	-0.959201	1.9184	1
ENSG00000094916.15	CBX5	0.0550944	40	3	0.00938028	Esophagus_Mucosa	0.873009	Artery_Tibial	30.7486	7.66574e-16	1.62954	-2.59787	2.47253	-0.774326	2.15751	3
ENSG00000137692.11	DCUN1D5	0.0550978	49	3	0.01393	Heart_Atrial_Appendage	0.8054	Artery_Aorta	33.107	1.40316e-15	3.1786	-2.45906	1.12105	-0.280313	0.78186	3
ENSG00000166535.19	A2ML1	0.055128	27	4	0.01486	Artery_Aorta	0.923962	Skin_Not_Sun_Exposed_Suprapubic	16.165	4.46293e-16	0.803832	-2.43577	2.43577	-0.417547	1.31653	4
ENSG00000251584.1	RP11-440I14.3	0.0551616	18	4	0.00739821	Adipose_Subcutaneous	0.8943	Lung	13.2071	6.07122e-17	0.869722	-2.67837	0.132865	-1.13988	0.866519	4
ENSG00000102753.9	KPNA3	0.0551792	40	6	0.01697	Brain_Frontal_Cortex_BA9	0.9236	Esophagus_Mucosa	26.0264	5.70055e-16	0.984151	-1.36485	2.38736	0.949507	0.964494	6
ENSG00000100023.18	PPIL2	0.0551885	48	3	0.01288	Skin_Not_Sun_Exposed_Suprapubic	0.998714	Pituitary	36.2809	5.00596e-16	2.77691	-1.0838	2.48707	0.653309	0.870937	3
ENSG00000159479.16	MED8	0.0551963	49	5	0.037648	Skin_Not_Sun_Exposed_Suprapubic	0.983999	Brain_Putamen_basal_ganglia	34.8378	1.20959e-15	1.19725	-1.55766	2.07867	-0.0158948	0.740718	5
ENSG00000166173.10	LARP6	0.0552001	42	4	0.0116502	Esophagus_Gastroesophageal_Junction	0.990258	Brain_Caudate_basal_ganglia	24.3289	7.09168e-16	0.948663	-2.32579	2.52257	1.19489	1.27101	4
ENSG00000138311.15	ZNF365	0.0552387	18	4	0.0008173	Brain_Spinal_cord_cervical_c-1	0.925	Brain_Caudate_basal_ganglia	12.7123	2.05698e-17	0.954977	-3.34687	1.51414	-0.427087	1.48113	4
ENSG00000105672.14	ETV2	0.0552604	42	5	0.005908	Colon_Transverse	0.8388	Brain_Anterior_cingulate_cortex_BA24	26.896	5.20416e-16	0.924153	-2.75284	2.70444	-0.868161	0.885297	5
ENSG00000154518.9	ATP5G3	0.0552759	49	2	0.0140745	Adrenal_Gland	0.6738	Skin_Not_Sun_Exposed_Suprapubic	41.8653	8.94474e-16	5.41763	-2.45536	-0.420938	-2.13618	0.334803	2
ENSG00000092820.17	EZR	0.0552826	48	4	0.00137526	Minor_Salivary_Gland	0.83919	Adipose_Visceral_Omentum	27.3391	6.07405e-16	1.89367	-1.42441	3.19979	1.55116	1.16884	4
ENSG00000275427.1	CTD-2281E23.1	0.0553673	3	2	0.01874	Pituitary	0.7836	Brain_Cortex	2.24327	0.0301814	0.726545	-0.274631	2.35066	1.17881	1.33511	2
ENSG00000072778.19	ACADVL	0.0553898	23	2	0.01881	Adipose_Visceral_Omentum	0.9448	Brain_Nucleus_accumbens_basal_ganglia	14.8073	3.61704e-17	7.3684	-0.693972	2.34928	1.27701	1.00261	2
ENSG00000151468.10	CCDC3	0.0553979	42	7	0.00999677	Artery_Aorta	0.833126	Cells_Cultured_fibroblasts	22.0849	4.48225e-16	1.01835	-0.56452	2.57594	0.558211	0.885761	7
ENSG00000114767.6	RRP9	0.0554139	46	1	0.05347	Brain_Anterior_cingulate_cortex_BA24	0.158343	Brain_Amygdala	44.1834	6.29119e-16	44.1834	-1.93111	1.93094	-1.80057	0.576311	1
ENSG00000278224.5	PRICKLE4	0.0554378	39	4	0.02711	Brain_Cerebellum	0.873582	Colon_Transverse	29.3551	9.90864e-16	1.17466	-2.14893	2.20993	0.0402416	1.13078	4
ENSG00000226762.1	RP11-298E9.6	0.05559	1	1	0.05559	Brain_Amygdala	0.05559	Brain_Amygdala	1	1	1	1.91424	1.91424	1.91424	NA	1
ENSG00000259267.2	RP11-432J9.6	0.05559	1	1	0.05559	Testis	0.05559	Testis	1	1	1	1.91424	1.91424	1.91424	NA	1
ENSG00000205444.2	RP4-529N6.1	0.0556654	4	1	0.04508	Skin_Not_Sun_Exposed_Suprapubic	0.1105	Uterus	3.95576	1.4327e-16	3.95576	-2.00391	-1.59595	-1.90192	0.203979	1
ENSG00000197580.11	BCO2	0.0557051	45	6	0.0265173	Vagina	0.995853	Heart_Atrial_Appendage	23.7861	2.26514e-15	1.17537	-1.55826	2.21855	0.476812	0.938551	6
ENSG00000002549.12	LAP3	0.0559094	37	3	0.00621475	Stomach	0.229224	Brain_Cerebellar_Hemisphere	31.397	8.99344e-16	1.12517	-2.34947	2.73623	-0.330051	2.07833	3
ENSG00000113851.14	CRBN	0.0559289	39	5	0.0398	Breast_Mammary_Tissue	0.989181	Esophagus_Gastroesophageal_Junction	22.4387	2.0583e-15	0.814573	-2.05582	1.38845	-0.32703	0.875544	5
ENSG00000174943.9	KCTD13	0.0559333	41	2	0.0152306	Colon_Transverse	0.132291	Esophagus_Mucosa	35.2415	7.22767e-16	4.35066	-1.95452	2.42685	1.53348	1.3308	2
ENSG00000188883.4	KLRG2	0.0559942	17	5	0.04143	Adipose_Subcutaneous	0.9287	Breast_Mammary_Tissue	7.91127	1.66541e-17	0.549615	-2.0392	0.0992551	-1.41472	0.739264	5
ENSG00000238266.1	LINC00707	0.0560625	24	5	0.01456	Kidney_Cortex	0.9987	Testis	13.8529	9.41084e-18	1.18305	-2.44314	1.80721	-0.438611	1.00178	5
ENSG00000258038.5	CTD-2384A14.1	0.05615	1	1	0.05615	Testis	0.05615	Testis	1	1	1	1.90987	1.90987	1.90987	NA	1
ENSG00000163596.16	ICA1L	0.0561804	40	2	0.0394922	Breast_Mammary_Tissue	0.59447	Whole_Blood	34.0444	1.00012e-15	5.69085	-1.9234	2.05902	0.854723	1.59507	2
ENSG00000116761.11	CTH	0.0561848	28	4	0.03307	Stomach	0.386652	Brain_Caudate_basal_ganglia	20.6083	8.56035e-16	0.700519	-2.13123	1.27108	-0.629698	1.1537	4
ENSG00000260476.1	RP11-254F7.1	0.05623	2	1	0.05623	Adrenal_Gland	0.05623	Liver	2	0	2	-1.90925	-1.90925	-1.90925	6.28037e-16	1
ENSG00000197408.8	CYP2B6	0.0563809	4	2	0.01629	Kidney_Cortex	0.1322	Liver	3.44759	5.59144e-17	0.552405	1.50548	2.40235	2.12201	0.424425	2
ENSG00000112874.9	NUDT12	0.0563812	49	5	0.0254972	Prostate	0.999188	Brain_Amygdala	31.1071	5.88458e-16	1.1729	-2.23379	0.949827	-1.0221	0.854219	5
ENSG00000133997.11	MED6	0.0564276	28	7	0.05466	Brain_Cortex	0.978569	Adipose_Subcutaneous	11.5563	2.89177e-16	0.391197	-1.92157	1.67343	0.419578	0.995931	7
ENSG00000165997.4	ARL5B	0.0565174	37	3	0.04656	Adipose_Subcutaneous	0.7772	Cells_Cultured_fibroblasts	25.4986	1.18241e-15	2.28157	-1.99028	1.99028	1.10579	1.2753	3
ENSG00000113971.19	NPHP3	0.0565276	49	2	0.008154	Prostate	0.1831	Brain_Spinal_cord_cervical_c-1	44.3433	1.23403e-15	2.58631	-2.64563	-1.33127	-2.21817	0.211896	2
ENSG00000238358.2	RP5-1121E10.2	0.056573	8	4	0.00798268	Pituitary	0.953	Brain_Cortex	5.34533	3.51214e-17	0.303645	-2.6528	0.0589399	-1.61805	1.0656	4
ENSG00000214534.5	ZNF705E	0.0566259	32	3	0.01758	Pituitary	0.7646	Cells_EBV-transformed_lymphocytes	21.0317	1.02452e-15	3.70496	-0.377772	2.37435	1.37771	0.690859	3
ENSG00000178999.12	AURKB	0.0566324	16	5	0.02162	Brain_Substantia_nigra	0.8899	Artery_Coronary	10.1768	3.78034e-18	0.389927	-2.10964	2.29698	-0.286409	1.13018	5
ENSG00000174899.10	PQLC2L	0.0566615	41	4	0.04745	Esophagus_Gastroesophageal_Junction	0.8529	Brain_Amygdala	29.7209	9.15053e-16	1.53622	-1.98226	1.18076	-0.0435844	0.856587	4
ENSG00000117411.16	B4GALT2	0.0568393	42	4	0.01733	Adipose_Subcutaneous	0.986073	Lung	29.7824	1.40372e-15	2.04353	-2.37963	1.36581	0.135572	0.960843	4
ENSG00000160294.10	MCM3AP	0.0569123	47	3	0.110801	Muscle_Skeletal	0.953638	Brain_Hypothalamus	38.7658	1.98125e-15	1.64207	-1.01249	1.5946	-0.417755	0.636171	3
ENSG00000168917.8	SLC35G2	0.0569193	21	3	0.06681	Esophagus_Mucosa	0.8938	Adipose_Subcutaneous	15.5491	1.92898e-17	0.938479	-1.8266	1.83295	-0.416125	1.46771	3
ENSG00000254480.1	RP11-23F23.2	0.0569528	24	4	0.00806739	Adipose_Subcutaneous	0.901437	Brain_Spinal_cord_cervical_c-1	12.3984	4.94768e-17	0.996169	-2.64924	1.00477	0.00450563	1.3102	4
ENSG00000174483.19	BBS1	0.0569563	48	2	0.00933305	Skin_Not_Sun_Exposed_Suprapubic	0.866829	Testis	36.0505	7.87191e-16	10.3649	-2.59961	2.27811	-1.53175	1.40744	2
ENSG00000167034.9	NKX3-1	0.056979	47	5	0.000960499	Whole_Blood	0.9012	Artery_Aorta	24.0457	4.59971e-16	1.12477	-3.30185	2.18593	1.00943	1.10012	5
ENSG00000255257.1	AC025016.1	0.057	1	1	0.057	Testis	0.057	Testis	1	1	1	1.90331	1.90331	1.90331	NA	1
ENSG00000129354.11	AP1M2	0.0570028	43	4	0.004111	Brain_Hippocampus	0.923601	Esophagus_Mucosa	23.1336	1.01861e-15	3.3063	-2.86952	2.79235	0.272509	1.28848	4
ENSG00000277494.1	GPIHBP1	0.0570299	45	4	0.04151	Brain_Caudate_basal_ganglia	0.827008	Brain_Amygdala	32.4167	8.45679e-16	1.32768	-2.0384	1.14176	-0.769272	0.610628	4
ENSG00000270022.3	RNU12	0.0570571	18	2	0.113	Testis	0.769673	Artery_Aorta	16.8514	3.67085e-17	1.11744	0.292803	1.58485	1.15662	0.293067	2
ENSG00000139684.13	ESD	0.0570584	41	3	0.00414355	Brain_Cortex	0.750021	Heart_Atrial_Appendage	34.5029	5.2837e-16	1.81903	-2.86266	2.86702	0.957161	2.11044	3
ENSG00000215244.2	RP11-563J2.2	0.0570758	41	7	0.00697989	Breast_Mammary_Tissue	0.932213	Heart_Left_Ventricle	18.8178	1.75098e-15	0.689121	-2.6978	1.52136	0.0666787	1.27841	7
ENSG00000181038.13	METTL23	0.0570804	4	3	0.007189	Cells_Cultured_fibroblasts	0.1141	Skin_Not_Sun_Exposed_Suprapubic	3.16992	1.63369e-16	0.196476	1.58003	2.68796	1.92243	0.525049	3
ENSG00000142186.16	SCYL1	0.0571204	23	3	0.001392	Whole_Blood	0.932323	Skin_Sun_Exposed_Lower_leg	16.6474	1.40859e-18	1.09422	-0.315608	3.1963	0.401742	1.07821	3
ENSG00000117505.12	DR1	0.0571212	47	2	0.0142148	Esophagus_Muscularis	0.409144	Pituitary	41.2685	1.04378e-15	4.36467	-2.1127	2.45179	2.05266	0.807308	2
ENSG00000228329.1	LINC01890	0.0573178	2	2	0.02075	Whole_Blood	0.106768	Testis	1.4643	0.535697	0.535697	-1.61289	2.3125	0.349806	2.77567	2
ENSG00000196866.2	HIST1H2AD	0.0573233	18	3	0.09124	Brain_Frontal_Cortex_BA9	0.8863	Artery_Coronary	15.4148	3.93709e-17	0.998612	-1.68889	1.31295	0.474994	0.932291	3
ENSG00000149488.12	TMC2	0.0573512	35	6	0.0463225	Brain_Caudate_basal_ganglia	0.7333	Brain_Nucleus_accumbens_basal_ganglia	17.3765	1.67646e-15	0.792698	-1.95723	1.99244	-0.205137	1.07452	6
ENSG00000204978.2	ERICH4	0.0573748	35	4	0.00200681	Skin_Not_Sun_Exposed_Suprapubic	0.2836	Brain_Frontal_Cortex_BA9	17.2995	2.4591e-16	0.675872	1.07227	3.08922	1.94487	0.573395	4
ENSG00000272853.1	RP11-398C13.6	0.0573875	12	2	0.05881	Nerve_Tibial	0.9216	Brain_Putamen_basal_ganglia	11.4379	4.09225e-34	0.562057	0.0984185	1.88961	1.74034	0.517073	2
ENSG00000243147.7	MRPL33	0.0574053	13	4	0.03683	Kidney_Cortex	0.7063	Heart_Left_Ventricle	10.4972	7.55122e-19	0.505697	-2.08764	0.592822	-0.671778	0.602632	4
ENSG00000263508.5	RP11-963H4.3	0.0574609	43	6	0.01853	Adipose_Visceral_Omentum	0.968729	Esophagus_Muscularis	25.3252	5.72642e-16	0.886085	-2.35485	1.03311	-1.22097	0.727365	6
ENSG00000177971.8	IMP3	0.0575087	40	4	0.098	Brain_Cerebellum	0.5286	Esophagus_Muscularis	23.2697	3.8851e-16	0.779218	-1.63295	1.65463	-1.10385	0.782874	4
ENSG00000065675.14	PRKCQ	0.0575228	49	5	0.00275976	Small_Intestine_Terminal_Ileum	0.796915	Esophagus_Mucosa	28.5108	9.83382e-16	1.02908	-2.9933	2.12556	-0.570725	1.12758	5
ENSG00000151726.13	ACSL1	0.057539	35	5	0.001497	Skin_Sun_Exposed_Lower_leg	0.9868	Heart_Left_Ventricle	22.3783	6.52871e-16	0.885224	-3.17526	1.83721	0.250221	0.767574	5
ENSG00000161057.11	PSMC2	0.0576673	9	4	0.1182	Prostate	0.3923	Brain_Substantia_nigra	5.62858	2.35165e-17	0.677668	-1.56237	1.52084	-0.371902	1.44577	4
ENSG00000203965.12	EFCAB7	0.0577016	48	3	0.00581971	Adipose_Visceral_Omentum	0.7616	Liver	32.1519	8.79485e-16	1.60706	-2.75777	0.981642	-1.72451	0.911058	3
ENSG00000164023.14	SGMS2	0.0577428	18	5	0.007752	Cells_Cultured_fibroblasts	0.9603	Breast_Mammary_Tissue	11.2751	1.42249e-18	0.689014	-1.98892	2.66268	0.0371557	1.07737	5
ENSG00000128040.10	SPINK2	0.0578293	37	6	0.00694946	Small_Intestine_Terminal_Ileum	0.969442	Brain_Hypothalamus	21.621	5.40744e-16	0.862072	-2.69926	2.21835	-1.30797	1.16958	6
ENSG00000125846.15	ZNF133	0.0579226	40	7	0.009441	Brain_Putamen_basal_ganglia	0.949954	Testis	12.0406	9.62788e-16	0.872665	-2.59566	1.54809	0.0949051	0.906288	7
ENSG00000254319.5	RP11-134O21.1	0.0579596	39	3	0.0197322	Brain_Cortex	0.796292	Brain_Substantia_nigra	32.0985	3.15237e-15	1.69181	-2.3314	0.573066	-1.1549	0.673269	3
ENSG00000188112.8	C6orf132	0.057986	30	11	0.002498	Pituitary	0.996988	Adrenal_Gland	9.0567	4.45889e-16	0.389488	-3.02358	3.02358	0.146894	1.67408	11
ENSG00000275966.1	RP11-1055B8.9	0.0580635	32	2	0.01325	Heart_Left_Ventricle	0.2617	Colon_Sigmoid	29.0379	2.41911e-15	1.91767	1.12238	2.47698	1.3196	0.429752	2
ENSG00000183668.17	PSG9	0.05809	2	1	0.05809	Testis	0.05809	Cells_Cultured_fibroblasts	2	7.85046e-17	2	-1.89502	-1.89502	-1.89502	6.28037e-16	1
ENSG00000241233.3	KRTAP5-8	0.0581266	11	2	0.02688	Artery_Coronary	0.3436	Brain_Anterior_cingulate_cortex_BA24	9.92197	7.00374e-20	0.998436	-1.19753	2.21326	-0.165955	1.18753	2
ENSG00000133665.12	DYDC2	0.0581462	27	3	0.00437773	Brain_Caudate_basal_ganglia	0.7665	Brain_Substantia_nigra	16.7818	3.47368e-16	2.81489	-2.71872	2.84958	-0.380114	1.83872	3
ENSG00000117724.12	CENPF	0.058194	33	2	0.178	Adipose_Subcutaneous	0.77547	Testis	28.6681	1.11525e-15	3.42539	-1.34694	1.34694	-0.623934	1.13431	2
ENSG00000127989.13	MTERF1	0.058329	46	2	0.07878	Brain_Cerebellum	0.921531	Skin_Sun_Exposed_Lower_leg	37.6061	1.18312e-15	7.39508	-1.75781	1.75781	0.315119	0.983422	2
ENSG00000103199.13	ZNF500	0.0583512	49	3	0.03704	Brain_Amygdala	0.954272	Cells_EBV-transformed_lymphocytes	42.2387	4.17048e-15	1.72771	-2.08532	1.687	0.798484	0.617512	3
ENSG00000177602.5	GSG2	0.0583618	21	6	0.02312	Lung	0.9167	Brain_Putamen_basal_ganglia	13.6728	4.73359e-18	0.723532	-2.27145	1.57222	-0.651905	1.34039	6
ENSG00000176842.14	IRX5	0.05839	19	1	0.05839	Adipose_Subcutaneous	0.05839	Brain_Cerebellum	19	3.0857e-18	19	-1.89276	1.89276	0.498094	1.87608	1
ENSG00000141002.19	TCF25	0.0583958	43	7	0.142549	Esophagus_Mucosa	0.8692	Liver	19.6035	2.84591e-16	0.808355	-1.20809	1.46637	0.387831	0.84325	7
ENSG00000230062.5	ANKRD66	0.05843	1	1	0.05843	Brain_Anterior_cingulate_cortex_BA24	0.05843	Brain_Anterior_cingulate_cortex_BA24	1	1	1	1.89246	1.89246	1.89246	NA	1
ENSG00000105402.7	NAPA	0.0584342	33	4	0.007659	Adipose_Visceral_Omentum	0.383392	Brain_Nucleus_accumbens_basal_ganglia	22.5596	1.24911e-15	0.82775	0.871664	2.66674	1.17764	0.537558	4
ENSG00000272250.1	RP11-346C20.4	0.0584943	29	4	0.05457	Brain_Cortex	0.6771	Artery_Aorta	22.9012	9.75144e-16	0.993824	-1.92228	1.73965	-1.24561	0.772456	4
ENSG00000013588.7	GPRC5A	0.0584988	22	6	0.05354	Skin_Sun_Exposed_Lower_leg	0.824981	Artery_Tibial	12.3793	6.85831e-18	0.474722	-1.93054	1.8633	-0.693507	0.890448	6
ENSG00000251692.7	PTX4	0.0585748	22	4	0.001126	Lung	0.308	Small_Intestine_Terminal_Ileum	16.8067	1.06221e-17	0.927701	1.01943	3.25699	1.73816	0.629288	4
ENSG00000151474.21	FRMD4A	0.0585828	18	10	0.002204	Breast_Mammary_Tissue	0.9489	Cells_Cultured_fibroblasts	9.04898	3.89366e-17	0.516308	-3.06127	1.15693	-0.0853906	1.23818	10
ENSG00000105519.15	CAPS	0.0586113	49	4	0.00539914	Brain_Nucleus_accumbens_basal_ganglia	0.949556	Colon_Sigmoid	33.4171	8.17547e-16	1.39991	-0.529873	2.7822	1.13806	0.909907	4
ENSG00000260300.5	RP11-505K9.4	0.0586483	48	4	0.01637	Minor_Salivary_Gland	0.966866	Whole_Blood	35.3488	9.273e-16	1.183	-2.40056	1.59916	-0.952285	0.795128	4
ENSG00000250317.8	SMIM20	0.0587587	30	3	0.02951	Adrenal_Gland	0.882	Skin_Not_Sun_Exposed_Suprapubic	23.0141	5.34984e-16	1.16662	-0.689355	2.17661	0.928729	0.578627	3
ENSG00000256725.1	RP11-662M24.2	0.0588039	10	4	0.03524	Brain_Hypothalamus	0.6004	Ovary	5.27168	1.69699e-17	0.31128	-2.10559	1.58222	-0.551033	1.67655	4
ENSG00000159228.12	CBR1	0.0588239	42	4	0.01549	Brain_Caudate_basal_ganglia	0.975734	Nerve_Tibial	23.3058	1.11488e-15	1.69964	-2.42072	1.42314	-0.886549	1.12344	4
ENSG00000129460.15	NGDN	0.05883	40	2	0.0414551	Brain_Amygdala	0.970448	Brain_Nucleus_accumbens_basal_ganglia	32.8398	6.08197e-16	6.89834	-1.78534	2.03895	0.587113	0.883798	2
ENSG00000170128.4	GPR25	0.0588685	13	4	0.02514	Spleen	0.285419	Whole_Blood	9.05067	1.11416e-17	0.350882	-2.23924	1.11232	0.212129	1.42858	4
ENSG00000104312.7	RIPK2	0.0589643	49	4	0.0782344	Breast_Mammary_Tissue	0.979566	Artery_Tibial	28.3188	7.87243e-16	1.72022	-1.72621	1.76102	0.27962	1.04005	4
ENSG00000248360.7	LINC00504	0.0589881	12	7	0.001903	Brain_Substantia_nigra	0.9941	Esophagus_Muscularis	4.57048	1.79655e-18	0.254757	-3.10497	3.10497	0.502865	1.81937	7
ENSG00000107643.15	MAPK8	0.0590293	39	4	0.002681	Esophagus_Muscularis	0.5505	Artery_Aorta	25.3737	8.56473e-16	1.37922	-3.00213	-0.597011	-2.06498	0.764468	4
ENSG00000100583.4	SAMD15	0.0590991	43	2	0.007532	Artery_Coronary	0.427067	Adipose_Subcutaneous	34.6719	1.18999e-15	7.32331	-2.67236	1.02874	-2.01368	0.736259	2
ENSG00000258740.1	RP11-293M10.1	0.0591023	2	2	0.1564	Skin_Not_Sun_Exposed_Suprapubic	0.5123	Skin_Sun_Exposed_Lower_leg	1.60782	0.392178	0.392178	-0.655261	1.41728	0.381011	1.46551	2
ENSG00000113595.14	TRIM23	0.0591116	38	1	0.03209	Cells_Cultured_fibroblasts	0.2643	Muscle_Skeletal	36.9286	1.27165e-15	36.9286	1.11629	2.14329	1.85624	0.218274	1
ENSG00000151881.14	TMEM267	0.0591614	36	4	0.01739	Liver	0.798	Artery_Tibial	25.6911	9.5774e-16	1.03756	-2.26543	2.37836	-0.748389	1.62458	4
ENSG00000196850.5	PPTC7	0.05932	16	1	0.05932	Adipose_Subcutaneous	0.05932	Adipose_Visceral_Omentum	16	5.83411e-18	16	-1.88581	1.88581	0.942907	1.68672	1
ENSG00000177508.11	IRX3	0.0594434	39	8	0.045963	Ovary	0.9977	Stomach	19.7046	8.4366e-16	0.694949	-1.99573	1.24712	0.137648	0.904108	8
ENSG00000196878.14	LAMB3	0.0594499	20	11	0.02342	Brain_Hypothalamus	0.8423	Adrenal_Gland	6.29197	1.23852e-17	0.340423	-2.26651	2.26651	-0.435405	1.37848	11
ENSG00000234438.3	KBTBD13	0.059548	8	2	0.0197527	Artery_Tibial	0.2721	Adipose_Visceral_Omentum	7.46942	3.27764e-17	0.516711	1.09824	2.33101	1.35874	0.406156	2
ENSG00000105854.12	PON2	0.0596005	35	9	0.00419303	Muscle_Skeletal	0.981833	Pancreas	11.2421	8.73601e-16	0.446782	-2.86326	1.53169	-0.151878	0.980121	9
ENSG00000137218.10	FRS3	0.0596465	39	4	0.00243071	Whole_Blood	0.940935	Skin_Not_Sun_Exposed_Suprapubic	30.9498	4.98517e-16	1.23837	-3.03184	2.87408	0.0359904	1.58088	4
ENSG00000134365.12	CFHR4	0.05967	1	1	0.05967	Nerve_Tibial	0.05967	Nerve_Tibial	1	1	1	1.88322	1.88322	1.88322	NA	1
ENSG00000103375.10	AQP8	0.0596732	41	1	0.0430066	Pancreas	0.3158	Brain_Caudate_basal_ganglia	38.1802	3.62e-15	38.1802	1.00313	2.02365	1.83513	0.175459	1
ENSG00000135220.10	UGT2A3	0.0597198	4	2	0.0434173	Colon_Transverse	0.6485	Colon_Sigmoid	3.17164	2.18953e-47	0.828362	-2.01967	0.455847	-0.163033	1.23776	2
ENSG00000157551.17	KCNJ15	0.0597295	22	4	0.0142805	Cells_Cultured_fibroblasts	0.984637	Spleen	11.0924	1.07382e-17	0.578915	-0.938484	2.45013	-0.0923514	0.73494	4
ENSG00000225058.1	RP11-132N15.1	0.05974	1	1	0.05974	Adrenal_Gland	0.05974	Adrenal_Gland	1	1	1	-1.88271	-1.88271	-1.88271	NA	1
ENSG00000064607.16	SUGP2	0.0597529	43	4	0.006685	Artery_Aorta	0.9479	Breast_Mammary_Tissue	21.7467	9.643e-16	0.764005	-2.71214	0.762268	-1.46242	1.03527	4
ENSG00000161016.17	RPL8	0.0597728	48	1	0.0379061	Cells_Cultured_fibroblasts	0.4427	Brain_Substantia_nigra	45.7267	1.88294e-15	45.7267	-2.07587	-0.767642	-1.83059	0.196305	1
ENSG00000131100.12	ATP6V1E1	0.0598321	47	2	0.0231767	Stomach	0.94535	Skin_Not_Sun_Exposed_Suprapubic	42.1295	7.30647e-16	2.96593	-1.91903	2.27051	-0.598635	0.67452	2
ENSG00000008300.16	CELSR3	0.0598721	23	3	0.1962	Muscle_Skeletal	0.895958	Esophagus_Gastroesophageal_Junction	17.3215	1.10033e-17	1.89088	-1.29245	1.26743	0.3443	1.04408	3
ENSG00000089876.11	DHX32	0.059914	25	2	0.009719	Ovary	0.393	Brain_Hypothalamus	22.0293	2.37607e-17	2.43973	-2.58567	1.23804	-2.0548	0.819468	2
ENSG00000063046.17	EIF4B	0.0600069	49	2	0.02357	Cells_EBV-transformed_lymphocytes	0.9669	Small_Intestine_Terminal_Ileum	44.807	7.64004e-16	2.81278	-2.26407	-0.0414966	-1.29939	0.498196	2
ENSG00000130540.13	SULT4A1	0.0600076	47	4	0.0286267	Heart_Left_Ventricle	0.974473	Cells_Cultured_fibroblasts	25.3108	1.28049e-15	1.99826	-1.95325	2.18859	0.0628028	0.697811	4
ENSG00000272856.1	RP11-710E1.2	0.0600131	29	4	0.07735	Small_Intestine_Terminal_Ileum	0.9036	Brain_Caudate_basal_ganglia	14.3019	7.94813e-16	0.939254	-1.76627	1.76627	0.0935039	0.841604	4
ENSG00000188277.9	C15orf62	0.0600265	9	2	0.03386	Brain_Cerebellum	0.4729	Nerve_Tibial	7.06669	3.61046e-33	1.93331	-2.12173	2.12173	-0.395252	1.97284	2
ENSG00000248994.1	RP11-259O2.1	0.0600329	40	7	0.0130248	Artery_Tibial	0.9873	Pancreas	21.803	2.12444e-15	0.893751	-2.48309	2.09602	-1.01943	1.13259	7
ENSG00000141985.9	SH3GL1	0.0600606	45	5	0.00592974	Esophagus_Mucosa	0.956141	Brain_Frontal_Cortex_BA9	20.8211	5.19769e-16	1.42215	-2.24795	2.75164	-0.466221	1.38199	5
ENSG00000136999.4	NOV	0.0600619	48	3	0.0132264	Brain_Putamen_basal_ganglia	0.798531	Cells_EBV-transformed_lymphocytes	31.94	4.43354e-16	1.64019	-1.18107	2.47761	-0.510661	0.848016	3
ENSG00000213424.8	KRT222	0.0600725	36	2	0.02135	Artery_Tibial	0.9509	Brain_Hypothalamus	32.2291	1.07973e-15	2.00983	-2.30174	0.888448	-0.579936	0.832855	2
ENSG00000165474.5	GJB2	0.0601678	46	4	0.001399	Testis	0.845124	Prostate	34.5119	1.04363e-15	2.07914	-2.02153	3.19486	-0.374151	0.851357	4
ENSG00000105967.15	TFEC	0.0602815	16	3	0.01784	Brain_Cortex	0.9498	Artery_Tibial	10.2235	2.07519e-17	1.91162	-2.36892	-0.0629579	-0.848753	0.693686	3
ENSG00000122873.11	CISD1	0.0603047	35	3	0.0083606	Colon_Transverse	0.3095	Esophagus_Gastroesophageal_Junction	25.9613	2.53728e-15	2.56254	-2.22294	2.63715	1.31255	1.52702	3
ENSG00000185420.18	SMYD3	0.0603856	41	9	0.00561659	Ovary	0.948812	Brain_Anterior_cingulate_cortex_BA24	11.1929	3.23648e-16	0.396243	-2.07984	2.76936	0.192755	1.06202	9
ENSG00000129473.9	BCL2L2	0.0604038	26	5	0.01884	Esophagus_Gastroesophageal_Junction	0.9763	Cells_Cultured_fibroblasts	15.1202	1.06611e-15	1.20554	-2.34868	2.34868	0.747132	1.23922	5
ENSG00000234255.8	AC012370.3	0.0604442	5	2	0.0157	Testis	0.1641	Pituitary	4.55812	6.11493e-18	0.441879	-2.41582	2.23266	1.06716	1.97373	2
ENSG00000229613.1	LINC01501	0.0604497	3	2	0.01378	Brain_Cortex	0.09184	Brain_Cerebellar_Hemisphere	2.66139	0.0505185	0.288091	-2.46295	-1.68577	-2.12138	0.397033	2
ENSG00000261319.1	LINC02152	0.0604709	2	2	0.05174	Thyroid	0.1616	Heart_Atrial_Appendage	1.02491	0.975092	0.975092	-1.94529	1.39971	-0.27279	2.36527	2
ENSG00000134042.12	MRO	0.0605155	45	7	0.0098657	Brain_Substantia_nigra	0.951429	Minor_Salivary_Gland	20.4584	1.89449e-15	0.73637	-1.48713	2.5805	0.492792	0.920193	7
ENSG00000189241.6	TSPYL1	0.0605989	42	3	0.00914639	Muscle_Skeletal	0.76675	Adipose_Visceral_Omentum	33.1458	5.19895e-16	2.64124	-2.60653	0.486377	-1.71496	0.733201	3
ENSG00000119318.12	RAD23B	0.0606318	34	5	0.004845	Muscle_Skeletal	0.9188	Brain_Frontal_Cortex_BA9	18.3597	1.16267e-15	0.995617	-0.287016	2.81716	0.601013	0.548666	5
ENSG00000179862.6	CITED4	0.0606628	42	8	0.04141	Esophagus_Gastroesophageal_Junction	0.997626	Adipose_Subcutaneous	16.0373	6.50301e-16	0.758508	-1.85792	2.0394	0.0346529	1.02568	8
ENSG00000124784.8	RIOK1	0.0606707	47	2	0.02523	Cells_EBV-transformed_lymphocytes	0.4968	Esophagus_Gastroesophageal_Junction	42.1254	6.5271e-16	2.45692	-1.39605	2.23786	1.30086	0.558147	2
ENSG00000160201.11	U2AF1	0.0607112	14	4	0.1964	Breast_Mammary_Tissue	0.6149	Skin_Not_Sun_Exposed_Suprapubic	8.46196	5.8646e-19	0.4297	-1.14744	1.29188	0.361284	1.08963	4
ENSG00000114948.12	ADAM23	0.0607507	42	6	0.00126104	Liver	0.8044	Ovary	23.3278	1.90459e-15	0.808434	-0.247657	3.2247	2.14673	0.780543	6
ENSG00000185475.10	TMEM179B	0.0607838	49	3	0.0390808	Minor_Salivary_Gland	0.9527	Nerve_Tibial	38.6983	7.43999e-16	1.56625	-2.06334	0.830776	-1.36266	0.772654	3
ENSG00000165138.17	ANKS6	0.0607901	43	2	0.01345	Artery_Aorta	0.612344	Brain_Cortex	35.6702	1.32361e-15	6.04417	-2.01801	2.47163	1.27186	1.20077	2
ENSG00000198169.8	ZNF251	0.0607914	33	2	0.0158468	Thyroid	0.09591	Small_Intestine_Terminal_Ileum	31.0282	5.98905e-16	1.64845	-2.0382	2.41243	1.84196	0.720712	2
ENSG00000067167.7	TRAM1	0.0608267	48	4	0.0197491	Cells_EBV-transformed_lymphocytes	0.9386	Muscle_Skeletal	28.0139	5.80553e-16	1.62507	-2.33108	1.99028	-0.802446	1.39461	4
ENSG00000251443.1	LINC02160	0.06087	2	1	0.06087	Minor_Salivary_Gland	0.06087	Minor_Salivary_Gland	2	7.85046e-17	2	-1.87444	-1.87444	-1.87444	0	1
ENSG00000100599.15	RIN3	0.0608924	42	9	0.01097	Small_Intestine_Terminal_Ileum	0.9876	Adipose_Subcutaneous	17.4224	1.535e-15	0.590726	-2.54365	1.81515	0.0158777	0.918788	9
ENSG00000204682.5	CASC10	0.060934	45	3	0.0742816	Brain_Cerebellar_Hemisphere	0.991566	Artery_Coronary	29.3099	5.90215e-16	2.40067	-1.66361	1.78488	0.368185	0.792574	3
ENSG00000111276.10	CDKN1B	0.0609535	36	5	0.023	Esophagus_Mucosa	0.9287	Prostate	16.7215	4.55169e-16	0.874377	-2.2042	2.27343	-0.51937	1.51553	5
ENSG00000234745.10	HLA-B	0.0609808	41	11	0.03526	Brain_Hippocampus	0.978322	Breast_Mammary_Tissue	18.4035	1.64413e-15	0.65741	-2.01077	2.10536	0.163575	0.987005	11
ENSG00000197841.14	ZNF181	0.0610286	49	2	0.119478	Brain_Substantia_nigra	0.87815	Adrenal_Gland	45.0012	6.70625e-16	2.53414	-1.55697	-0.153315	-0.911152	0.593105	2
ENSG00000167664.8	TMIGD2	0.0610543	31	5	0.0317499	Liver	0.985409	Cells_EBV-transformed_lymphocytes	15.237	4.48049e-16	0.527539	-0.292898	2.14755	0.648406	0.591714	5
ENSG00000148110.15	MFSD14B	0.0611117	38	5	0.00216394	Adipose_Visceral_Omentum	0.87889	Cells_EBV-transformed_lymphocytes	15.7642	1.06834e-15	3.30352	-3.06676	1.44272	-1.29966	1.08217	5
ENSG00000278195.1	SSTR3	0.0611661	20	6	0.02056	Brain_Putamen_basal_ganglia	0.825295	Spleen	8.18844	4.48671e-18	0.365232	-2.23557	2.31597	0.159782	1.5187	6
ENSG00000128805.14	ARHGAP22	0.0612098	38	10	0.001762	Brain_Cortex	0.9958	Adipose_Subcutaneous	12.865	1.1675e-15	0.539556	-2.37492	3.12767	-0.208453	1.22011	10
ENSG00000251536.2	RP11-572C21.1	0.0612419	1	1	0.0612419	Testis	0.0612419	Testis	1	1	1	1.87175	1.87175	1.87175	NA	1
ENSG00000063438.16	AHRR	0.0612786	31	9	0.00612	Artery_Coronary	0.992257	Colon_Sigmoid	12.5358	6.66689e-16	0.477979	-2.21615	2.74128	0.674808	1.2086	9
ENSG00000260464.1	RP4-561L24.3	0.0613328	36	4	0.0584624	Thyroid	0.8775	Whole_Blood	22.4147	2.48171e-16	3.12648	-1.89221	1.6434	-0.0746762	1.59591	4
ENSG00000111252.10	SH2B3	0.061367	41	1	0.06137	Small_Intestine_Terminal_Ileum	0.92827	Minor_Salivary_Gland	40.0012	3.69691e-15	40.0012	-1.87082	1.87082	0.81914	1.67702	1
ENSG00000198663.16	C6orf89	0.0613946	41	5	0.008266	Spleen	0.983	Prostate	21.2887	4.31938e-16	0.858056	-1.93753	2.64101	0.28111	1.22499	5
ENSG00000120784.15	ZFP30	0.0614173	48	4	0.004016	Brain_Caudate_basal_ganglia	0.999957	Artery_Aorta	26.0996	6.53744e-16	0.935696	-2.8769	2.46924	-0.329573	1.62751	4
ENSG00000039650.11	PNKP	0.06142	42	3	0.00544603	Brain_Cerebellum	0.908922	Prostate	24.7737	1.723e-15	1.71266	-2.77939	2.59876	-1.27653	1.23989	3
ENSG00000226965.1	AC003088.1	0.0614336	1	1	0.0614336	Cells_Cultured_fibroblasts	0.0614336	Cells_Cultured_fibroblasts	1	1	1	-1.87036	-1.87036	-1.87036	NA	1
ENSG00000135480.15	KRT7	0.0614401	39	6	0.003745	Brain_Anterior_cingulate_cortex_BA24	0.9694	Artery_Coronary	23.1306	2.1152e-15	0.811114	-2.51434	2.89888	0.248808	1.96404	6
ENSG00000205544.3	TMEM256	0.0614787	46	4	0.0126268	Thyroid	0.437756	Liver	32.1614	1.58737e-15	1.72692	-2.49412	-0.775988	-1.61916	0.481146	4
ENSG00000005981.12	ASB4	0.0615687	27	6	0.01801	Heart_Atrial_Appendage	0.8259	Colon_Sigmoid	19.0921	4.73949e-16	0.64781	-0.66633	2.36541	1.06553	0.798584	6
ENSG00000197322.3	C17orf102	0.0615881	14	4	0.1834	Brain_Substantia_nigra	0.969166	Brain_Spinal_cord_cervical_c-1	9.25694	7.26797e-18	0.367476	-0.950954	1.33036	0.0814143	0.768903	4
ENSG00000180878.2	C11orf42	0.0616601	22	2	0.02401	Thyroid	0.396	Adipose_Visceral_Omentum	20.5963	4.32009e-18	0.835511	-2.25697	0.848787	-0.552714	0.839039	2
ENSG00000154917.10	RAB6B	0.0618243	48	4	0.0213118	Testis	0.982994	Brain_Frontal_Cortex_BA9	37.4309	7.57218e-16	1.28939	-2.30241	1.35161	-0.375498	0.692364	4
ENSG00000172322.13	CLEC12A	0.0618548	44	3	0.00462469	Lung	0.07092	Artery_Coronary	36.3741	1.07925e-15	1.23905	-2.83208	-1.80599	-2.35302	0.276293	3
ENSG00000149577.15	SIDT2	0.0618664	42	7	0.01017	Adipose_Subcutaneous	0.994682	Colon_Transverse	18.8553	9.40908e-16	0.712551	-2.56999	2.27323	0.235189	1.31767	7
ENSG00000273664.1	RP11-2N1.3	0.0618883	8	3	0.0171842	Colon_Sigmoid	0.4627	Skin_Not_Sun_Exposed_Suprapubic	5.73038	1.03533e-16	0.858122	-1.05637	2.38274	1.51832	1.23269	3
ENSG00000236485.1	LINC01945	0.0619174	2	2	0.0238789	Lung	0.8405	Nerve_Tibial	1.20493	0.795073	0.795073	-2.25907	0.201254	-1.02891	1.73971	2
ENSG00000204352.2	C9orf129	0.061935	15	2	0.0185351	Lung	0.480475	Brain_Cerebellum	9.33986	2.51438e-17	5.36067	-2.35475	-0.705538	-1.61608	0.686619	2
ENSG00000185640.5	KRT79	0.0619366	4	3	0.1457	Esophagus_Mucosa	0.7026	Skin_Sun_Exposed_Lower_leg	2.60177	2.35514e-16	0.51913	-1.35663	1.45489	0.215472	1.16376	3
ENSG00000275898.1	RP11-497G19.7	0.0619429	6	5	0.07543	Brain_Spinal_cord_cervical_c-1	0.3238	Whole_Blood	2.14333	1.55605e-16	0.500818	-1.77784	1.47208	-0.11909	1.43046	5
ENSG00000176928.5	GCNT4	0.0620137	42	5	0.00140782	Artery_Coronary	0.84933	Brain_Caudate_basal_ganglia	20.646	5.0836e-16	0.716707	-3.19304	1.3674	-1.00649	0.977562	5
ENSG00000257114.2	RP11-25I15.3	0.0620384	2	2	0.03679	Uterus	0.05167	Testis	1.46841	0.531592	0.531592	-2.08809	-1.94587	-2.01698	0.10056	2
ENSG00000137960.5	GIPC2	0.0621017	37	4	0.0254125	Esophagus_Muscularis	0.959392	Cells_Cultured_fibroblasts	24.4401	9.98204e-16	1.71717	-1.9779	2.23507	0.259758	0.953028	4
ENSG00000134453.15	RBM17	0.0621138	33	7	0.0716679	Kidney_Cortex	0.9147	Brain_Cerebellar_Hemisphere	18.973	3.77834e-16	0.864116	-1.80122	1.73433	0.365951	0.778179	7
ENSG00000231324.1	AP000696.2	0.0621338	3	2	0.01833	Brain_Hypothalamus	0.9909	Kidney_Cortex	1.98759	0.00661479	1.0058	-0.0114054	2.35888	0.853929	1.30821	2
ENSG00000118246.13	FASTKD2	0.0621547	46	2	0.0170896	Skin_Not_Sun_Exposed_Suprapubic	0.99515	Brain_Cortex	36.0535	6.3089e-16	8.3327	-2.38477	2.24951	-1.69646	1.09112	2
ENSG00000153495.10	TEX29	0.0621695	46	7	0.003752	Thyroid	0.83942	Esophagus_Gastroesophageal_Junction	25.3347	2.38309e-15	0.845444	-2.89829	2.05985	-0.739411	1.37292	7
ENSG00000140057.8	AK7	0.0621827	43	2	0.0118525	Brain_Cerebellum	0.145789	Esophagus_Muscularis	40.8238	4.02966e-15	1.984	-2.5165	-1.45457	-1.9235	0.296743	2
ENSG00000214338.10	SOGA3	0.0622677	41	6	0.006641	Brain_Frontal_Cortex_BA9	0.43863	Colon_Sigmoid	21.8972	1.1837e-15	1.23673	-2.71433	0.864278	-1.26001	0.709731	6
ENSG00000188282.12	RUFY4	0.0622774	42	2	0.0194361	Whole_Blood	0.9697	Brain_Cerebellum	29.9352	1.42024e-15	11.6574	-2.33706	0.957888	-1.11671	1.13966	2
ENSG00000169981.10	ZNF35	0.062282	47	6	0.00397994	Adrenal_Gland	0.900715	Brain_Substantia_nigra	21.398	5.40392e-16	1.27776	-2.87975	1.48234	0.111588	0.990011	6
ENSG00000112299.7	VNN1	0.0623283	49	5	0.01834	Brain_Amygdala	0.8506	Liver	36.13	1.38984e-15	1.33686	-0.188353	2.35868	1.05746	0.600654	5
ENSG00000205186.2	FABP9	0.06233	1	1	0.06233	Breast_Mammary_Tissue	0.06233	Breast_Mammary_Tissue	1	1	1	1.86394	1.86394	1.86394	NA	1
ENSG00000160209.18	PDXK	0.0624017	44	10	0.01043	Brain_Hypothalamus	0.978299	Adipose_Visceral_Omentum	14.6081	1.33021e-15	0.518964	-1.94165	2.56124	0.883365	1.13781	10
ENSG00000205899.3	BHLHA9	0.0625	3	1	0.0625	Brain_Amygdala	0.0625	Brain_Frontal_Cortex_BA9	3	1.28198e-16	3	-1.86273	-1.86273	-1.86273	3.14018e-16	1
ENSG00000154237.12	LRRK1	0.0625045	32	6	0.0352124	Cells_Cultured_fibroblasts	0.96584	Skin_Not_Sun_Exposed_Suprapubic	15.9274	1.10759e-15	0.563988	-2.10591	1.9836	-0.596114	1.46906	6
ENSG00000092068.19	SLC7A8	0.0625876	41	11	0.02159	Prostate	0.9859	Heart_Left_Ventricle	12.7378	1.12929e-15	0.588687	-2.2975	2.12352	-0.0874118	1.37288	11
ENSG00000178951.8	ZBTB7A	0.0625905	29	2	0.009186	Brain_Amygdala	0.128027	Esophagus_Mucosa	27.8229	1.12411e-15	0.950393	-2.44932	2.60505	-1.39919	1.7082	2
ENSG00000170290.3	SLN	0.0625936	37	4	0.07923	Brain_Cortex	0.872882	Uterus	21.3459	5.1169e-16	0.94805	-1.75517	1.64127	-0.52992	1.20798	4
ENSG00000196805.7	SPRR2B	0.0625973	4	2	0.2264	Testis	0.9108	Skin_Not_Sun_Exposed_Suprapubic	3.76177	2.9332e-18	0.187896	-1.20968	0.11203	-0.486968	0.699	2
ENSG00000169314.14	C22orf15	0.0626033	16	3	0.05734	Nerve_Tibial	0.848	Artery_Aorta	11.4052	4.72253e-18	0.668824	-0.191671	1.90071	0.635411	0.985303	3
ENSG00000118997.13	DNAH7	0.0626676	40	2	0.0184177	Brain_Cerebellum	0.9862	Vagina	27.3115	7.35859e-16	11.7766	-2.35711	2.29125	-0.488384	1.49054	2
ENSG00000204287.13	HLA-DRA	0.0626895	31	6	0.0109404	Esophagus_Muscularis	0.981282	Brain_Caudate_basal_ganglia	13.1406	1.07199e-15	0.864091	-2.5446	1.65433	0.0724872	1.22353	6
ENSG00000269930.1	RP11-932O9.9	0.0627065	22	1	0.0623	Heart_Atrial_Appendage	0.3288	Brain_Nucleus_accumbens_basal_ganglia	21.3363	1.68602e-17	21.3363	-1.86415	0.976534	-1.73503	0.605637	1
ENSG00000137331.11	IER3	0.0627485	34	7	0.003536	Lung	0.9806	Cells_EBV-transformed_lymphocytes	12.655	1.79785e-16	0.680813	-1.78132	2.91684	0.0450584	0.999014	7
ENSG00000242553.1	AP001432.14	0.0627555	19	4	0.0366214	Heart_Atrial_Appendage	0.9431	Adipose_Subcutaneous	12.863	1.10327e-17	0.778595	-2.08996	1.13685	-0.802163	1.15149	4
ENSG00000176533.12	GNG7	0.0627848	18	8	0.004344	Esophagus_Gastroesophageal_Junction	0.993	Lung	8.17599	2.32792e-17	0.351324	-2.85204	2.26651	-0.789898	1.42949	8
ENSG00000137936.16	BCAR3	0.0627937	45	5	0.052231	Cells_Cultured_fibroblasts	0.978552	Brain_Cerebellar_Hemisphere	28.502	4.60588e-16	0.970248	-1.6895	1.94123	-0.0681745	0.981094	5
ENSG00000272374.1	RP3-329A5.8	0.06291	8	3	0.02967	Adipose_Subcutaneous	0.456274	Testis	5.86015	3.36051e-17	0.873625	-2.17447	2.17447	0.0220623	2.03849	3
ENSG00000258280.1	RP11-1028N23.2	0.06307	1	1	0.06307	Testis	0.06307	Testis	1	1	1	-1.8587	-1.8587	-1.8587	NA	1
ENSG00000108443.13	RPS6KB1	0.0630723	28	3	0.0628154	Esophagus_Gastroesophageal_Junction	0.9962	Brain_Caudate_basal_ganglia	17.6856	3.14452e-16	3.71759	-1.8605	1.6169	0.318926	1.22999	3
ENSG00000130711.3	PRDM12	0.0630966	11	3	0.0280905	Brain_Hippocampus	0.6255	Brain_Caudate_basal_ganglia	7.38246	4.46023e-17	0.925393	-1.10998	2.19602	0.169647	1.27323	3
ENSG00000228789.6	HCG22	0.0631096	39	3	0.00306378	Artery_Coronary	0.7548	Esophagus_Mucosa	32.7138	3.21837e-15	1.65762	-2.9315	2.96127	0.748214	2.35032	3
ENSG00000139636.15	LMBR1L	0.0631464	36	1	0.04149	Adipose_Visceral_Omentum	0.3834	Artery_Tibial	34.0662	3.35704e-15	34.0662	0.871649	2.0386	1.80105	0.26724	1
ENSG00000101216.10	GMEB2	0.0631574	39	2	0.03919	Muscle_Skeletal	0.889112	Liver	29.8843	1.45437e-15	7.14898	-2.06219	1.22866	0.0632419	1.04491	2
ENSG00000272369.1	RP11-446N19.1	0.0631773	45	4	0.0112963	Esophagus_Gastroesophageal_Junction	0.632	Heart_Atrial_Appendage	32.0679	5.96011e-16	2.02128	-2.5334	-0.478914	-2.19147	0.478376	4
ENSG00000228482.1	LINC01713	0.06321	1	1	0.06321	Testis	0.06321	Testis	1	1	1	-1.85771	-1.85771	-1.85771	NA	1
ENSG00000174021.10	GNG5	0.0633358	49	3	0.0271034	Thyroid	0.99587	Prostate	39.9136	1.63946e-15	1.59939	-2.21003	0.895965	-0.0980774	0.764733	3
ENSG00000105991.7	HOXA1	0.0633446	26	3	0.002335	Muscle_Skeletal	0.976092	Skin_Sun_Exposed_Lower_leg	21.8294	9.22266e-16	1.02437	-1.077	3.04394	0.138003	0.651055	3
ENSG00000164393.8	ADGRF2	0.0633592	16	3	0.004336	Minor_Salivary_Gland	0.0793	Testis	13.1045	1.06146e-16	0.607263	-2.85262	2.80306	-1.61403	1.60234	3
ENSG00000110427.14	KIAA1549L	0.0633824	44	8	0.00532307	Testis	0.780951	Nerve_Tibial	17.3713	1.22735e-15	0.703607	-1.19649	2.7868	0.78644	0.833784	8
ENSG00000188089.13	PLA2G4E	0.0635194	6	6	0.05593	Colon_Transverse	0.9964	Brain_Cortex	2.29127	0.187857	0.187857	-0.908698	1.91158	0.728231	1.05121	6
ENSG00000234880.1	LINC00163	0.0635982	15	9	0.0148602	Artery_Tibial	0.861735	Adipose_Visceral_Omentum	5.4638	1.37579e-17	0.212811	-2.43577	0.519055	-0.682424	0.780535	9
ENSG00000176920.11	FUT2	0.0636693	28	6	0.00540109	Lung	0.945463	Skin_Sun_Exposed_Lower_leg	14.3697	5.06606e-16	0.563317	-2.25745	2.78209	0.444375	1.51372	6
ENSG00000108878.4	CACNG1	0.0637165	6	2	0.0732462	Brain_Nucleus_accumbens_basal_ganglia	0.2654	Muscle_Skeletal	5.01714	1.56851e-18	0.958501	-1.79129	1.77505	-0.484169	1.76894	2
ENSG00000163138.18	PACRGL	0.0638248	49	3	0.01149	Brain_Spinal_cord_cervical_c-1	0.9587	Vagina	42.7097	4.21055e-15	1.97744	-2.52743	0.854912	-1.76334	0.645466	3
ENSG00000196510.12	ANAPC7	0.0638342	48	4	0.0285377	Whole_Blood	0.959372	Brain_Cerebellar_Hemisphere	28.4493	2.43496e-15	1.38287	-2.12086	2.18981	-0.620472	1.51616	4
ENSG00000182584.4	ACTL10	0.0639133	23	2	0.007748	Colon_Sigmoid	0.1262	Minor_Salivary_Gland	21.3471	1.04774e-17	1.54437	-2.66286	2.66286	1.75037	1.42501	2
ENSG00000148337.20	CIZ1	0.0639356	47	3	0.02659	Adrenal_Gland	0.978201	Ovary	26.4221	5.7267e-16	1.19017	-2.21748	1.77369	-0.346971	1.47901	3
ENSG00000267517.1	LINC01855	0.0639665	1	1	0.0639665	Testis	0.0639665	Testis	1	1	1	1.85241	1.85241	1.85241	NA	1
ENSG00000196305.17	IARS	0.0639698	49	4	0.00111809	Heart_Atrial_Appendage	0.9479	Brain_Putamen_basal_ganglia	37.1154	7.90781e-16	1.53191	-3.25899	1.24129	-2.29728	1.10598	4
ENSG00000115896.15	PLCL1	0.0640808	49	3	0.004853	Whole_Blood	0.976572	Brain_Hippocampus	23.6177	5.59305e-16	5.7998	-2.81663	2.41869	-0.450433	1.61372	3
ENSG00000197415.11	VEPH1	0.0641192	37	4	0.04665	Brain_Cortex	0.9746	Brain_Amygdala	25.7522	1.77158e-15	2.01143	-1.98946	1.98946	0.117835	1.09201	4
ENSG00000002822.15	MAD1L1	0.0641416	34	8	0.00408547	Esophagus_Muscularis	0.4218	Lung	14.2178	3.41404e-16	0.603565	-1.4214	2.87149	1.11347	1.33247	8
ENSG00000256591.5	RP11-286N22.8	0.0642726	48	2	0.012444	Stomach	0.3875	Adipose_Visceral_Omentum	44.2154	1.76747e-15	3.66871	0.86416	2.4993	1.99824	0.59039	2
ENSG00000196839.12	ADA	0.0643432	38	7	0.00760442	Pituitary	0.956523	Brain_Spinal_cord_cervical_c-1	19.4044	1.79493e-15	0.976089	-2.66915	2.35325	-0.963383	1.00586	7
ENSG00000226250.1	LINC00408	0.06438	1	1	0.06438	Testis	0.06438	Testis	1	1	1	-1.84954	-1.84954	-1.84954	NA	1
ENSG00000136463.7	TACO1	0.0645178	10	4	0.2178	Adipose_Visceral_Omentum	0.953	Heart_Left_Ventricle	5.14198	2.77011e-17	0.240556	-1.13113	1.2324	-0.369166	0.953306	4
ENSG00000267321.2	LINC02001	0.0645974	48	3	0.00640521	Uterus	0.9452	Adrenal_Gland	38.2147	1.72113e-15	3.95246	-2.72628	0.690945	-2.15503	0.926735	3
ENSG00000259847.1	LINC02126	0.0646046	7	3	0.02319	Breast_Mammary_Tissue	0.9539	Nerve_Tibial	3.9649	8.71446e-17	0.140628	-1.14165	2.27029	0.783951	1.19508	3
ENSG00000113248.5	PCDHB15	0.064659	45	5	0.01291	Testis	0.983639	Vagina	21.2721	3.67309e-16	0.892226	-1.45381	2.48624	-0.0256117	1.54648	5
ENSG00000127914.16	AKAP9	0.0646686	32	2	0.01956	Breast_Mammary_Tissue	0.5426	Skin_Sun_Exposed_Lower_leg	29.7031	7.61426e-16	2.17774	-2.33468	2.33468	0.135366	2.23986	2
ENSG00000226380.9	AC058791.1	0.0646725	43	4	0.04132	Breast_Mammary_Tissue	0.7522	Adipose_Visceral_Omentum	33.4942	1.24876e-15	1.27619	-1.8783	2.0403	1.15858	0.931173	4
ENSG00000034693.14	PEX3	0.0647313	46	2	0.0211445	Adipose_Subcutaneous	0.798964	Ovary	41.6076	4.01942e-16	3.42894	-2.30539	-0.254689	-1.86407	0.30904	2
ENSG00000267505.1	CTC-296K1.3	0.064739	35	3	0.00966777	Brain_Caudate_basal_ganglia	0.990072	Nerve_Tibial	27.2271	5.15214e-16	0.914629	-2.58749	1.82564	-0.423522	1.04078	3
ENSG00000166436.15	TRIM66	0.0647955	49	3	0.0154223	Brain_Frontal_Cortex_BA9	0.8231	Brain_Caudate_basal_ganglia	43.9165	1.64954e-15	1.80626	-2.42231	0.22356	-1.49623	0.538441	3
ENSG00000137709.9	POU2F3	0.0647955	34	3	0.003655	Minor_Salivary_Gland	0.943103	Small_Intestine_Terminal_Ileum	26.021	2.54849e-15	2.12315	-2.9065	1.6302	0.582372	0.974018	3
ENSG00000213639.9	PPP1CB	0.0648256	48	3	0.04566	Brain_Spinal_cord_cervical_c-1	0.998745	Thyroid	41.9478	1.54447e-15	2.12204	-1.3538	1.99852	0.404473	0.675774	3
ENSG00000163104.17	SMARCAD1	0.0648548	41	2	0.0627752	Adipose_Subcutaneous	0.821713	Brain_Cerebellum	27.3183	1.02926e-15	13.5812	-1.48781	1.86078	0.0962562	1.43673	2
ENSG00000213658.11	LAT	0.0648728	38	1	0.0127378	Adipose_Subcutaneous	0.0764	Whole_Blood	36.7425	3.62892e-15	36.7425	-2.49102	-1.77197	-1.82973	0.128799	1
ENSG00000154079.5	SDHAF4	0.0649124	44	2	0.000709733	Breast_Mammary_Tissue	0.8109	Brain_Hypothalamus	33.7993	1.37449e-15	9.28869	-3.38579	-0.239265	-1.96708	0.689469	2
ENSG00000182636.5	NDN	0.0649711	48	3	0.0562864	Brain_Caudate_basal_ganglia	0.9511	Brain_Amygdala	41.5956	4.1039e-15	1.65825	-1.90881	0.882431	0.567915	0.643082	3
ENSG00000184232.8	OAF	0.0649999	45	3	0.0323	Adrenal_Gland	0.957918	Cells_Cultured_fibroblasts	29.1357	7.76779e-16	3.92698	-2.14068	2.14068	0.541805	0.996524	3
ENSG00000092853.13	CLSPN	0.06501	1	1	0.06501	Testis	0.06501	Testis	1	1	1	-1.84519	-1.84519	-1.84519	NA	1
ENSG00000131652.13	THOC6	0.0650157	19	3	0.01987	Liver	0.2171	Colon_Transverse	17.2262	3.03216e-19	0.780188	-2.32879	1.31265	0.848775	1.11929	3
ENSG00000104894.11	CD37	0.0650586	43	2	0.001211	Cells_EBV-transformed_lymphocytes	0.901565	Brain_Hypothalamus	33.2375	4.81821e-16	8.79067	-3.23628	1.53816	-0.456925	1.07422	2
ENSG00000226140.5	RP11-461K13.1	0.0651	1	1	0.0651	Testis	0.0651	Testis	1	1	1	-1.84457	-1.84457	-1.84457	NA	1
ENSG00000011083.8	SLC6A7	0.0651616	34	6	0.00856494	Small_Intestine_Terminal_Ileum	0.9881	Breast_Mammary_Tissue	14.8799	1.41534e-15	0.889837	-2.62895	1.33952	-0.557204	1.38839	6
ENSG00000225718.1	RP11-3P22.2	0.0652	1	1	0.0652	Testis	0.0652	Testis	1	1	1	-1.84388	-1.84388	-1.84388	NA	1
ENSG00000148700.14	ADD3	0.0653046	47	4	0.1221	Skin_Sun_Exposed_Lower_leg	0.9589	Brain_Cerebellum	36.1823	3.55e-15	1.32361	-1.54602	0.845915	-0.337405	0.706563	4
ENSG00000182606.14	TRAK1	0.0653987	34	7	0.01326	Brain_Hippocampus	0.9337	Brain_Caudate_basal_ganglia	12.4916	4.77146e-16	0.427513	-1.48517	2.47671	1.28968	1.21464	7
ENSG00000178467.17	P4HTM	0.0654212	43	2	0.008876	Prostate	0.1916	Adipose_Visceral_Omentum	38.3379	1.09709e-15	3.67044	-2.61679	-1.30586	-1.80067	0.471179	2
ENSG00000105392.15	CRX	0.06543	1	1	0.06543	Testis	0.06543	Testis	1	1	1	1.84231	1.84231	1.84231	NA	1
ENSG00000133065.10	SLC41A1	0.0654331	47	2	0.01135	Brain_Cortex	0.7051	Adrenal_Gland	38.4107	2.2954e-15	7.0008	-2.53173	0.378445	-2.03584	0.617499	2
ENSG00000177951.17	BET1L	0.0654994	45	7	0.006383	Adrenal_Gland	0.945153	Vagina	19.0521	1.23678e-15	1.02971	-2.6772	2.72743	1.13583	1.28883	7
ENSG00000108417.3	KRT37	0.0655872	3	2	0.02254	Skin_Sun_Exposed_Lower_leg	0.5266	Esophagus_Mucosa	2.1799	0.0096696	0.810432	0.633205	2.28114	1.55425	0.84095	2
ENSG00000197479.6	PCDHB11	0.0657148	45	3	0.07715	Uterus	0.845206	Esophagus_Mucosa	38.0573	1.68301e-15	1.81098	-1.76747	1.65561	-0.0781153	0.838747	3
ENSG00000130449.5	ZSWIM6	0.0657181	9	4	0.02556	Whole_Blood	0.7838	Thyroid	5.26597	5.05756e-33	0.647679	-2.23283	0.475543	-1.4717	0.929405	4
ENSG00000163430.11	FSTL1	0.0657187	18	3	0.03377	Brain_Hypothalamus	0.5435	Adipose_Subcutaneous	12.823	1.05763e-18	1.16253	-2.12281	2.12281	-1.12497	1.44381	3
ENSG00000261386.2	CTD-2012K14.6	0.06581	6	1	0.06581	Adipose_Subcutaneous	0.06581	Adipose_Subcutaneous	6	2.28235e-32	6	-1.83972	-1.83972	-1.83972	0	1
ENSG00000205078.5	SYCE1L	0.0659715	48	2	0.0134977	Esophagus_Gastroesophageal_Junction	0.1546	Brain_Anterior_cingulate_cortex_BA24	43.3886	1.22222e-15	1.68963	-2.47036	-1.42347	-1.96527	0.234035	2
ENSG00000155530.2	LRGUK	0.0659858	44	6	0.000589327	Nerve_Tibial	0.163409	Testis	30.1403	2.95825e-15	1.15412	1.3937	3.43648	2.51625	0.551324	6
ENSG00000122034.14	GTF3A	0.0660242	47	4	0.0575343	Colon_Sigmoid	0.890203	Cells_EBV-transformed_lymphocytes	26.0876	4.82293e-16	1.57058	-1.89923	1.78721	-0.101229	0.927256	4
ENSG00000188162.10	OTOG	0.0660269	2	2	0.04949	Testis	0.06666	Pituitary	1.33025	0.669746	0.669746	-1.96435	-1.83396	-1.89915	0.092197	2
ENSG00000114030.12	KPNA1	0.0660302	47	4	0.00179885	Artery_Tibial	0.9002	Skin_Sun_Exposed_Lower_leg	28.8584	4.0665e-16	2.59637	-2.22353	3.12158	1.66063	1.42222	4
ENSG00000011451.17	WIZ	0.0660775	2	2	0.02937	Skin_Sun_Exposed_Lower_leg	0.521	Brain_Anterior_cingulate_cortex_BA24	1.08479	0.915215	0.915215	-2.17848	-0.641805	-1.41014	1.0866	2
ENSG00000126787.12	DLGAP5	0.0660973	17	2	0.0331	Breast_Mammary_Tissue	0.7686	Testis	13.6489	2.87097e-17	2.99704	-2.13087	1.36836	-1.21862	0.858959	2
ENSG00000108679.12	LGALS3BP	0.066222	44	6	0.04325	Brain_Amygdala	0.9982	Brain_Nucleus_accumbens_basal_ganglia	22.8204	1.4074e-15	0.786609	-2.02129	1.14623	0.00938795	0.942042	6
ENSG00000226453.1	RP11-379B8.1	0.0663857	20	6	0.05126	Ovary	0.7381	Artery_Coronary	13.4611	7.90669e-18	0.474554	-1.2421	1.9493	0.923482	0.680139	6
ENSG00000123094.15	RASSF8	0.0664162	44	7	0.01945	Prostate	0.9608	Adipose_Subcutaneous	17.7401	6.63095e-16	0.941163	-1.54406	2.33679	0.0227365	1.09602	7
ENSG00000157985.18	AGAP1	0.0664601	11	9	0.001107	Muscle_Skeletal	0.8617	Adrenal_Gland	3.04973	8.72711e-18	0.326619	-3.26182	1.17349	-0.552694	1.17905	9
ENSG00000148288.11	GBGT1	0.0665386	44	5	0.001925	Testis	0.8455	Small_Intestine_Terminal_Ileum	29.2343	4.01241e-16	1.02549	-1.6077	3.10157	0.463449	1.02488	5
ENSG00000254991.1	RP13-631K18.3	0.0666305	4	3	0.0121521	Cells_Cultured_fibroblasts	0.987091	Skin_Not_Sun_Exposed_Suprapubic	2.03847	0.0678222	0.898086	-0.774729	2.5077	0.530829	1.4056	3
ENSG00000143434.15	SEMA6C	0.0666478	48	3	0.0209983	Cells_Cultured_fibroblasts	0.996578	Brain_Spinal_cord_cervical_c-1	35.4572	3.49025e-15	5.42181	-1.91248	2.30802	-0.48753	1.02968	3
ENSG00000253898.1	LINC01419	0.066648	1	1	0.066648	Testis	0.066648	Testis	1	1	1	1.83404	1.83404	1.83404	NA	1
ENSG00000123416.15	TUBA1B	0.0666691	42	1	0.02868	Heart_Left_Ventricle	0.188	Muscle_Skeletal	41.7131	1.42137e-15	41.7131	1.31652	2.18786	1.82717	0.255147	1
ENSG00000165813.18	CCDC186	0.0667039	48	3	0.03093	Kidney_Cortex	0.997576	Brain_Substantia_nigra	40.949	7.9004e-16	3.31169	-2.15797	1.96205	0.0251656	0.741169	3
ENSG00000174939.10	ASPHD1	0.0667523	41	4	0.01986	Brain_Nucleus_accumbens_basal_ganglia	0.873081	Brain_Cerebellum	31.1641	9.89838e-16	1.07234	-1.36836	2.32898	1.25031	0.833326	4
ENSG00000114316.12	USP4	0.0668332	45	2	0.00885788	Colon_Sigmoid	0.913708	Brain_Substantia_nigra	36.2125	1.59806e-15	8.40163	-2.26455	2.61749	1.54198	1.34799	2
ENSG00000127540.11	UQCR11	0.0668631	36	1	0.002084	Muscle_Skeletal	0.6597	Lung	33.7737	6.40427e-16	33.7737	-1.92625	3.07799	0.0286104	1.83027	1
ENSG00000153774.8	CFDP1	0.0669557	38	3	0.00804	Pituitary	0.973486	Testis	27.6811	5.62579e-16	3.49349	-2.65039	2.23511	0.599346	1.18356	3
ENSG00000091128.12	LAMB4	0.06706	21	1	0.06706	Stomach	0.06706	Adipose_Subcutaneous	21	1.83979e-17	21	-1.83127	1.83127	-1.65686	0.799232	1
ENSG00000142549.9	IGLON5	0.0671425	16	4	0.0887639	Brain_Frontal_Cortex_BA9	0.7655	Artery_Aorta	12.6249	6.05986e-18	0.545867	-1.70195	1.18201	-0.444998	1.17428	4
ENSG00000182687.3	GALR2	0.0671553	2	2	0.02234	Colon_Sigmoid	0.7936	Testis	1.07193	0.928072	0.928072	-2.28454	0.261639	-1.01145	1.80042	2
ENSG00000277423.1	RP11-173P15.9	0.0671635	44	4	0.05845	Brain_Hypothalamus	0.980883	Brain_Spinal_cord_cervical_c-1	20.5798	4.97637e-16	0.809143	-0.8181	1.89231	0.931259	0.792422	4
ENSG00000240764.3	PCDHGC5	0.0671778	33	3	0.0109425	Adrenal_Gland	0.5769	Lung	29.9918	7.9205e-16	0.999738	-2.54453	2.51628	-2.21967	0.916735	3
ENSG00000126251.6	GPR42	0.0671834	8	3	0.032042	Adipose_Visceral_Omentum	0.9459	Colon_Sigmoid	6.03245	7.51539e-18	0.271329	-0.0853288	2.14389	0.788534	0.894755	3
ENSG00000231742.5	LINC01273	0.0672319	47	1	0.00944592	Skin_Sun_Exposed_Lower_leg	0.214102	Pituitary	44.6291	4.40108e-15	44.6291	1.24236	2.59548	1.78567	0.253712	1
ENSG00000271040.1	RP5-933K21.3	0.0672387	45	3	0.07106	Vagina	0.9478	Heart_Atrial_Appendage	33.6462	4.86957e-16	2.61403	-1.80509	1.27642	0.128802	0.757362	3
ENSG00000255561.6	FDXACB1	0.0673328	39	2	0.01778	Artery_Aorta	0.959928	Cells_Cultured_fibroblasts	30.9204	2.1694e-15	7.13227	-2.37017	0.869818	-1.09629	0.752501	2
ENSG00000268912.1	CTD-2619J13.17	0.0674042	47	3	0.0146747	Cells_Cultured_fibroblasts	0.6566	Ovary	36.0339	1.22533e-15	4.61405	-2.44031	0.444612	-1.36289	0.561673	3
ENSG00000179564.3	LSMEM2	0.0674284	40	1	0.06656	Adrenal_Gland	0.6436	Esophagus_Muscularis	39.0605	8.0518e-16	39.0605	-1.83463	1.83463	0.676421	1.70355	1
ENSG00000186377.7	CYP4X1	0.0674531	30	6	0.001965	Adipose_Subcutaneous	0.996087	Heart_Atrial_Appendage	14.4832	1.19101e-15	0.509338	-1.26076	3.09547	0.496117	0.89339	6
ENSG00000076662.9	ICAM3	0.0674985	34	3	0.03028	Brain_Cortex	0.95739	Skin_Not_Sun_Exposed_Suprapubic	26.6476	1.32713e-15	1.45982	-0.995486	2.16641	-0.669198	0.744442	3
ENSG00000198093.10	ZNF649	0.0675422	45	4	0.0249527	Skin_Sun_Exposed_Lower_leg	0.934382	Brain_Cerebellum	32.692	6.62352e-16	1.22739	-1.31981	2.24213	0.94955	0.863587	4
ENSG00000110324.10	IL10RA	0.067568	34	5	0.00216	Brain_Nucleus_accumbens_basal_ganglia	0.931631	Skin_Not_Sun_Exposed_Suprapubic	23.3055	5.32685e-16	0.885266	-0.352718	3.0673	0.345537	0.818784	5
ENSG00000151445.15	VIPAS39	0.067597	39	4	0.002808	Pancreas	0.6998	Artery_Aorta	23.0889	6.19618e-16	0.850984	-2.98801	0.38559	-1.61816	1.19722	4
ENSG00000125630.15	POLR1B	0.0675996	44	2	0.01847	Artery_Tibial	0.9515	Cells_EBV-transformed_lymphocytes	39.105	2.30679e-15	3.14145	-0.0608232	2.35606	1.8823	0.526397	2
ENSG00000108798.8	ABI3	0.0675998	47	3	0.008356	Breast_Mammary_Tissue	0.6501	Thyroid	39.1542	3.07614e-15	1.41232	-1.66632	2.63734	-0.580145	1.52674	3
ENSG00000124802.11	EEF1E1	0.0676302	41	3	0.005056	Cells_Cultured_fibroblasts	0.921441	Thyroid	33.341	6.36685e-16	1.97202	-0.130716	2.80344	1.47895	0.650447	3
ENSG00000197063.10	MAFG	0.06768	1	1	0.06768	Brain_Cerebellum	0.06768	Brain_Cerebellum	1	1	1	-1.82713	-1.82713	-1.82713	NA	1
ENSG00000130300.8	PLVAP	0.0677174	39	5	0.0023953	Lung	0.9934	Artery_Coronary	24.8328	2.42979e-15	0.929988	-0.323654	3.03626	0.354666	0.565589	5
ENSG00000120210.6	INSL6	0.0677314	1	1	0.0677314	Testis	0.0677314	Testis	1	1	1	-1.82679	-1.82679	-1.82679	NA	1
ENSG00000132965.9	ALOX5AP	0.0677582	42	5	0.003844	Skin_Not_Sun_Exposed_Suprapubic	0.9721	Brain_Hypothalamus	17.3146	1.43387e-15	1.9541	-2.89069	2.35007	0.140614	1.67161	5
ENSG00000168298.6	HIST1H1E	0.06776	1	1	0.06776	Brain_Nucleus_accumbens_basal_ganglia	0.06776	Brain_Nucleus_accumbens_basal_ganglia	1	1	1	-1.8266	-1.8266	-1.8266	NA	1
ENSG00000137713.15	PPP2R1B	0.0678017	47	2	0.0190506	Adipose_Subcutaneous	0.681575	Spleen	35.8784	7.96658e-16	9.48569	-2.34454	1.49154	-1.49148	0.880861	2
ENSG00000104689.9	TNFRSF10A	0.0678843	47	2	0.0139653	Skin_Sun_Exposed_Lower_leg	0.463463	Uterus	41.5464	4.10135e-15	2.97051	-2.45815	-0.733156	-1.82554	0.319607	2
ENSG00000110448.10	CD5	0.0679226	44	1	0.02301	Adrenal_Gland	0.489631	Brain_Hypothalamus	41.7085	1.01224e-15	41.7085	-2.27327	2.27327	-1.60954	0.920231	1
ENSG00000249364.5	RP11-434D9.1	0.0679483	4	4	0.09812	Muscle_Skeletal	0.8939	Lung	1.74108	0.231204	0.231204	-1.65404	-0.133371	-0.845519	0.702593	4
ENSG00000204572.9	KRTAP5-10	0.0679982	26	6	0.01402	Brain_Caudate_basal_ganglia	0.6767	Brain_Substantia_nigra	9.08788	7.25326e-16	0.807449	-1.63954	2.45675	0.738279	1.2175	6
ENSG00000115211.15	EIF2B4	0.0680224	11	2	0.03004	Heart_Atrial_Appendage	0.749	Heart_Left_Ventricle	9.12256	1.59134e-18	1.87744	-0.319958	2.16956	0.132682	1.00706	2
ENSG00000136929.12	HEMGN	0.0680589	16	2	0.02702	Thyroid	0.2468	Artery_Aorta	14.0576	3.22423e-18	1.94239	-2.21123	1.15816	0.744573	1.13034	2
ENSG00000099998.17	GGT5	0.0680858	41	4	0.0571207	Esophagus_Muscularis	0.6972	Testis	27.1144	8.04938e-16	1.30783	-1.90239	1.57524	-1.2764	0.714579	4
ENSG00000164597.13	COG5	0.0681799	41	4	0.00433673	Brain_Cerebellum	0.9878	Pancreas	24.0075	4.51717e-16	1.37256	-2.74762	2.85257	1.00647	1.51923	4
ENSG00000124159.15	MATN4	0.068263	28	5	0.0188	Brain_Anterior_cingulate_cortex_BA24	0.9891	Esophagus_Gastroesophageal_Junction	18.3681	1.76038e-15	0.713443	-2.34947	2.34947	-0.307357	1.15975	5
ENSG00000250066.1	RP11-141O11.1	0.0683174	1	1	0.0683174	Testis	0.0683174	Testis	1	1	1	-1.82291	-1.82291	-1.82291	NA	1
ENSG00000230945.1	LINC01507	0.0683377	2	2	0.1148	Brain_Frontal_Cortex_BA9	0.1275	Testis	1.10385	0.896154	0.896154	1.52403	1.57698	1.55051	0.0374383	2
ENSG00000102879.15	CORO1A	0.068367	45	2	0.02506	Adipose_Visceral_Omentum	0.9855	Adrenal_Gland	33.9601	1.1787e-15	10.5477	-2.24048	-0.0181741	-0.662145	0.984341	2
ENSG00000182952.4	HMGN4	0.0684231	45	3	0.00884549	Brain_Spinal_cord_cervical_c-1	0.9773	Brain_Nucleus_accumbens_basal_ganglia	32.391	9.06136e-16	1.8621	-0.165437	2.61797	1.54413	0.982848	3
ENSG00000244414.6	CFHR1	0.0684532	17	2	0.0289	Cells_Cultured_fibroblasts	0.9717	Adipose_Subcutaneous	15.2228	5.96745e-18	1.09863	0.0354762	2.18485	1.38474	0.705476	2
ENSG00000253782.1	RP11-350F16.2	0.0684597	2	2	0.4243	Spleen	0.6795	Testis	1.86199	0.138009	0.138009	-0.798983	-0.413146	-0.606064	0.272829	2
ENSG00000143774.16	GUK1	0.0684706	49	2	0.00446104	Artery_Coronary	0.997083	Whole_Blood	44.0145	4.20202e-15	4.6265	0.00365627	2.84358	1.8568	0.39021	2
ENSG00000137656.11	BUD13	0.0685482	17	5	0.05138	Brain_Amygdala	0.9581	Pituitary	7.60711	2.25565e-17	0.708443	-1.86537	1.94829	-0.0129566	1.28739	5
ENSG00000256223.5	ZNF10	0.0686239	49	3	0.00887461	Adipose_Visceral_Omentum	0.982842	Brain_Hypothalamus	27.5878	5.27436e-16	4.98171	-2.61685	1.52524	-0.765967	1.48473	3
ENSG00000163220.10	S100A9	0.0686889	42	3	0.01832	Brain_Amygdala	0.9951	Adrenal_Gland	28.5741	2.67241e-15	3.1697	-0.93033	2.35909	1.06221	1.1163	3
ENSG00000127081.13	ZNF484	0.0687465	46	9	0.0303477	Kidney_Cortex	0.993012	Pituitary	16.0358	8.87162e-16	0.619023	-2.16552	1.70928	-0.208385	1.2257	9
ENSG00000161547.16	SRSF2	0.06882	1	1	0.06882	Heart_Left_Ventricle	0.06882	Heart_Left_Ventricle	1	1	1	-1.8196	-1.8196	-1.8196	NA	1
ENSG00000125388.19	GRK4	0.0689554	49	2	0.09432	Brain_Substantia_nigra	0.971526	Brain_Putamen_basal_ganglia	45.931	9.14225e-16	1.85899	-1.67304	1.67304	0.579294	0.590741	2
ENSG00000198721.12	ECI2	0.0689938	46	3	0.01108	Minor_Salivary_Gland	0.9864	Brain_Anterior_cingulate_cortex_BA24	36.9088	1.22547e-15	3.49783	-2.54017	0.791953	-0.668101	0.764114	3
ENSG00000276073.1	RP5-1125A11.7	0.0689975	39	3	0.009353	Esophagus_Mucosa	0.9821	Adrenal_Gland	27.5397	6.46281e-16	0.945454	-2.59887	2.59887	0.300971	1.30757	3
ENSG00000229642.1	AC027119.1	0.06911	1	1	0.06911	Testis	0.06911	Testis	1	1	1	-1.8177	-1.8177	-1.8177	NA	1
ENSG00000111237.18	VPS29	0.0691328	46	3	0.04978	Liver	0.859727	Pancreas	37.9011	9.98247e-16	1.50738	-1.96185	0.889564	-0.865042	0.865076	3
ENSG00000144115.16	THNSL2	0.0691539	49	2	0.0637303	Cells_EBV-transformed_lymphocytes	0.949315	Brain_Nucleus_accumbens_basal_ganglia	44.5774	5.01284e-16	2.73344	-0.160517	1.85406	0.654483	0.57237	2
ENSG00000197714.8	ZNF460	0.0692141	15	4	0.01185	Esophagus_Muscularis	0.3489	Skin_Not_Sun_Exposed_Suprapubic	8.32147	5.70953e-18	0.545368	0.936725	2.51658	1.60936	0.43622	4
ENSG00000198736.11	MSRB1	0.0693178	43	3	0.0156505	Prostate	0.962352	Colon_Transverse	23.6152	8.03952e-16	3.65027	-2.41697	1.71659	-1.27663	1.19807	3
ENSG00000187164.19	SHTN1	0.0693433	36	3	0.0318596	Cells_Cultured_fibroblasts	0.7617	Brain_Hippocampus	30.6379	1.17965e-15	1.7091	-2.14617	2.13379	-0.0794394	1.04315	3
ENSG00000037042.8	TUBG2	0.0693964	47	3	0.1142	Spleen	0.999518	Skin_Sun_Exposed_Lower_leg	40.2247	3.95664e-15	1.463	-1.57959	1.50978	-0.657658	0.563614	3
ENSG00000226321.5	CROCC2	0.0694191	14	5	0.01073	Nerve_Tibial	0.997625	Stomach	8.09307	4.14378e-18	0.407116	-1.47393	2.55137	0.240365	1.2526	5
ENSG00000260573.2	RP11-21B23.3	0.06951	1	1	0.06951	Testis	0.06951	Testis	1	1	1	1.81509	1.81509	1.81509	NA	1
ENSG00000048471.13	SNX29	0.0695481	41	7	0.0160609	Lung	0.945189	Thyroid	20.0988	1.41502e-15	0.690227	-2.40753	0.722272	-1.16373	1.03582	7
ENSG00000149262.16	INTS4	0.0695623	46	4	0.06854	Brain_Amygdala	0.996081	Brain_Anterior_cingulate_cortex_BA24	31.1254	8.30784e-16	1.2417	-1.82144	1.36517	0.542959	0.701782	4
ENSG00000106211.8	HSPB1	0.0695685	15	4	0.005286	Pituitary	0.9834	Stomach	9.56717	8.13714e-19	0.836205	-2.06261	2.78907	1.20489	1.38411	4
ENSG00000248954.1	RP11-304F15.4	0.0695699	3	2	0.03358	Esophagus_Mucosa	0.5697	Testis	2.03894	0.0143271	0.946738	0.568493	2.12508	1.59201	0.88665	2
ENSG00000130304.16	SLC27A1	0.0696509	41	6	0.00254588	Brain_Cerebellum	0.976078	Skin_Not_Sun_Exposed_Suprapubic	21.7016	8.78728e-16	0.913945	-3.01783	2.7508	-0.64695	1.78947	6
ENSG00000099949.18	LZTR1	0.0696708	40	7	0.00343	Minor_Salivary_Gland	0.997656	Stomach	14.9243	1.29023e-15	0.956156	-2.92632	0.968089	-1.13946	0.883164	7
ENSG00000189051.5	RNF222	0.0696851	14	3	0.01188	Skin_Not_Sun_Exposed_Suprapubic	0.7483	Adipose_Subcutaneous	9.83544	1.94987e-17	0.987852	-1.46398	2.51569	0.536478	1.10007	3
ENSG00000248385.7	TARM1	0.0697469	2	2	0.0980064	Whole_Blood	0.512	Spleen	1.46465	0.535348	0.535348	-1.6546	0.655727	-0.499435	1.63365	2
ENSG00000105204.13	DYRK1B	0.0698087	41	2	0.0925342	Nerve_Tibial	0.8996	Artery_Tibial	37.81	2.26403e-15	1.70625	-1.25632	1.68218	1.3997	0.622998	2
ENSG00000185246.17	PRPF39	0.0698315	18	2	0.02118	Adipose_Visceral_Omentum	0.9541	Liver	16.0116	2.80671e-18	1.98841	-2.30476	2.30476	1.03073	1.96849	2
ENSG00000144035.3	NAT8	0.0698586	42	3	0.01443	Brain_Substantia_nigra	0.672966	Kidney_Cortex	27.3294	2.68276e-15	1.23382	-1.05051	2.44638	1.40535	0.847793	3
ENSG00000104805.15	NUCB1	0.069926	46	4	0.00197858	Skin_Sun_Exposed_Lower_leg	0.955906	Adipose_Subcutaneous	21.6526	1.89846e-15	0.88148	-3.09343	2.13734	-0.228659	1.78058	4
ENSG00000145428.14	RNF175	0.069927	37	5	0.0115386	Colon_Transverse	0.923283	Brain_Frontal_Cortex_BA9	23.321	8.32262e-16	0.961463	-0.674506	2.52595	0.82227	1.02076	5
ENSG00000182938.4	OTOP3	0.07005	1	1	0.07005	Esophagus_Mucosa	0.07005	Esophagus_Mucosa	1	1	1	-1.81159	-1.81159	-1.81159	NA	1
ENSG00000170291.14	ELP5	0.0700786	47	3	0.02906	Brain_Cerebellar_Hemisphere	0.955967	Adipose_Subcutaneous	35.5492	3.4905e-15	3.81839	-2.18267	1.61517	0.0870042	0.857267	3
ENSG00000236392.2	AC100848.1	0.07008	1	1	0.07008	Testis	0.07008	Testis	1	1	1	-1.81139	-1.81139	-1.81139	NA	1
ENSG00000078687.17	TNRC6C	0.0700935	12	5	0.08077	Nerve_Tibial	0.8943	Whole_Blood	7.89037	1.89467e-19	0.341503	-0.866529	1.74624	0.69323	0.610553	5
ENSG00000101150.17	TPD52L2	0.0700936	45	4	0.00403904	Brain_Cerebellum	0.965282	Lung	29.345	3.65027e-16	2.33104	-0.072505	2.8751	1.12418	0.637945	4
ENSG00000172061.8	LRRC15	0.0701062	28	2	0.1209	Skin_Sun_Exposed_Lower_leg	0.944904	Spleen	23.3503	2.28393e-15	2.93217	-1.53319	1.55101	0.260846	0.784367	2
ENSG00000052850.5	ALX4	0.0701391	29	2	0.02539	Brain_Cerebellar_Hemisphere	0.4751	Nerve_Tibial	20.2367	1.0014e-15	8.14762	-2.23542	-0.714205	-1.57713	0.515908	2
ENSG00000187581.2	COX8C	0.0701584	27	4	0.0168765	Esophagus_Muscularis	0.824452	Heart_Atrial_Appendage	18.7953	7.98711e-16	0.773576	-2.38939	0.417654	-1.66955	1.08821	4
ENSG00000173702.7	MUC13	0.0702085	12	4	0.05025	Artery_Coronary	0.8388	Pituitary	9.0147	5.80733e-18	0.417303	-1.95783	1.95783	-0.782802	1.76116	4
ENSG00000155816.19	FMN2	0.0702583	26	13	0.02456	Artery_Tibial	0.9407	Small_Intestine_Terminal_Ileum	8.01987	3.48253e-16	0.345294	-1.91667	2.24825	0.304393	0.946069	13
[truncated: 20,054 more rows]
