# Supplementary material for: Novel risk loci for COVID-19 hospitalization among admixed American populations
Source: eLife. 2024 Oct 3;13:RP93666. doi: 10.7554/eLife.93666 (PMC11449485; doi:10.7554/eLife.93666)
Supplement: Supplementary file 10. — Bonferroni correction thresholds: Pooled p<4.19E-06; PR p<4.99E-06; MX p<5.19E-06; AA p<4.67E-06. Var_g: variance of the gene expression; pred_perf_r2: cross-validated R2 of tissue model’s correlation to gene’s measured transcriptome; pref_perf_qval: qval of tissue model’s correlation to gene’s measured transcriptome; n_snps_used: number of snps from GWAS used in S-prediXcan analysis; n_snp_in_cov: number of snps in the covariance matrix; n_snps_in_model: number of snps in the model; best_gwas_p: the highest p-value from GWAS snps used in this model; largest_weight: the largest weight in this model. [file elife-93666-supp10.xlsx]

## Sheet: Supplementary Table 10.
Supplementary Table 10. Top 10 genes for the TWAS trained with the GALA II-SAGE models in Admixed Americans. Bonferroni correction thresholds: Pooled p<4.19E-06; PR p<4.99E-06; MX p<5.19E-06; AA p<4.67E-06. Var_g: variance of the gene expression; pred_perf_r2: cross validated R2 of tissue model's correlation to gene's measured transcriptome; pref_perf_qval: qval of tissue model's correlation to g…
gene	gene_name	zscore	pvalue	var_g	pred_perf_r2	pred_perf_pval	pred_perf_qval	n_snps_used	n_snps_in_cov	n_snps_in_model	best_gwas_p	largest_weight
Pooled cohort
ENSG00000131398.13	KCNC3	4.33407	1.46381e-05	0.074027	0.119243	4.34249e-79	NA	40	60	60	7.823e-06	0.108114
ENSG00000131400.8	NAPSA	-4.10825	3.98661e-05	0.0833701	0.114471	2.31874e-75	NA	101	153	153	4.911e-06	0.197972
ENSG00000185499.16	MUC1	4.02485	5.70108e-05	0.0221249	0.0409665	6.69311e-27	NA	25	42	42	0.0007384	0.210018
ENSG00000084652.16	TXLNA	-3.85999	0.000113394	0.0249186	0.0391666	1.25425e-25	NA	25	36	36	0.0001864	0.16424
ENSG00000177683.14	THAP5	3.84466	0.000120721	0.0935432	0.128033	2.32368e-85	NA	22	25	25	0.0004811	0.0912495
ENSG00000182504.11	CEP97	-3.81739	0.000134869	0.008631	0.0160301	3.19482e-11	NA	19	19	19	0.0001696	0.0685736
ENSG00000124587.14	PEX6	-3.81356	0.000136978	0.766528	0.80218	0	NA	136	179	179	0.0003397	0.498473
ENSG00000244041.7	LINC01011	-3.75537	0.000173089	0.28371	0.383079	0	NA	96	147	147	0.007651	1.06847
ENSG00000114738.11	MAPKAPK3	3.75345	0.000174418	0.131936	0.209814	4.49108e-147	NA	34	61	61	5.975e-05	0.334683
ENSG00000170190.16	SLC16A5	3.71083	0.000206583	0.174743	0.213019	2.27391e-150	NA	166	290	290	0.002778	0.631846
PR cohort
ENSG00000159110.19	IFNAR2	-4.30075	1.7022e-05	0.209788	0.355623	2.19404e-93	NA	79	118	118	7.61701e-06	0.314918
ENSG00000131398.13	KCNC3	4.04864	5.15169e-05	0.0471231	0.0874966	1.3574e-19	NA	26	36	36	1.857e-05	0.0516568
ENSG00000171109.19	MFN1	3.72865	0.000192507	0.157288	0.206712	6.80773e-48	NA	71	95	95	1.201e-07	0.726316
ENSG00000114378.17	HYAL1	3.72388	0.000196186	0.00708839	0.0108567	0.00193086	NA	38	45	45	7.771e-05	0.0725178
ENSG00000167034.10	NKX3-1	-3.71283	0.000204958	0.591469	0.699615	2.08777e-281	NA	106	164	164	0.000333	0.286151
ENSG00000114738.11	MAPKAPK3	3.69462	0.000220216	0.138395	0.21596	4.06368e-51	NA	23	43	43	8.678e-05	0.235827
ENSG00000130175.9	PRKCSH	-3.55231	0.000381861	0.0619242	0.0980291	6.46252e-22	NA	33	53	53	0.0002367	0.240727
ENSG00000124587.14	PEX6	-3.52549	0.000422708	0.730083	0.797747	0	NA	51	65	65	0.0003397	0.347614
ENSG00000244041.7	LINC01011	-3.51623	0.000437722	0.165453	0.270824	1.20029e-66	NA	50	94	94	0.007436	0.824148
ENSG00000249806.1	AC139720.1	3.48123	0.000499116	0.111002	0.137992	8.6761e-32	NA	64	95	95	0.001171	0.303119
AA cohort
ENSG00000159110.19	IFNAR2	-4.50133	6.75305e-06	0.156067	0.364533	2.21145e-82	NA	27	38	38	7.61701e-06	0.390073
ENSG00000131400.8	NAPSA	-4.37615	1.20796e-05	0.0264271	0.08473	2.55109e-16	NA	20	40	40	4.911e-06	0.181155
ENSG00000131398.13	KCNC3	4.26032	2.04139e-05	0.0252425	0.104357	5.85346e-20	NA	15	43	43	2.043e-05	0.119532
ENSG00000124587.14	PEX6	-3.93067	8.47105e-05	0.649351	0.773341	0	NA	50	87	87	0.001642	0.57946
ENSG00000177683.14	THAP5	3.64151	0.000271043	0.123245	0.202856	5.05884e-40	NA	21	26	26	0.0002759	0.113294
ENSG00000114388.12	NPRL2	3.59264	0.000327341	0.00995881	0.0442088	5.59817e-09	NA	10	19	19	2.298e-05	0.0868888
ENSG00000025800.14	KPNA6	3.5866	0.000335016	0.0131073	0.0585346	1.4516e-11	NA	14	19	19	9.291e-05	0.0544948
ENSG00000176490.5	DIRAS1	-3.56406	0.000365165	0.116297	0.174808	5.48877e-34	NA	48	75	75	0.002326	0.293384
ENSG00000134202.10	GSTM3	3.56149	0.00036876	0.419582	0.614328	3.1325e-184	NA	40	67	67	0.0002303	1.03364
ENSG00000160055.19	TMEM234	3.54001	0.000400113	0.00994039	0.0366409	1.03964e-07	NA	8	9	9	0.0001864	0.0734729
MX cohort
ENSG00000131400.8	NAPSA	-4.43677	9.13189e-06	0.0828776	0.131435	3.26337e-26	NA	28	29	29	4.911e-06	0.102411
ENSG00000088538.13	DOCK3	-4.29755	1.72694e-05	0.0417296	0.0535053	4.14859e-11	NA	35	39	39	4.565e-05	0.123227
ENSG00000171109.19	MFN1	3.99263	6.53451e-05	0.179532	0.223167	5.99799e-47	NA	62	63	63	1.201e-07	0.778291
ENSG00000131398.13	KCNC3	3.8457	0.000120207	0.0905762	0.145376	3.13438e-29	NA	16	16	16	7.775e-06	0.107343
ENSG00000198743.7	SLC5A3	3.80092	0.00014416	0.0474268	0.0963961	5.03584e-19	NA	30	36	36	0.0002135	0.248537
ENSG00000177683.14	THAP5	3.78935	0.000151039	0.0370026	0.0562781	1.44561e-11	NA	19	19	19	0.0004298	0.0754074
ENSG00000114738.11	MAPKAPK3	3.75221	0.000175282	0.0799141	0.131037	6.07616e-26	NA	21	23	23	4.104e-05	0.271875
ENSG00000249806.1	AC139720.1	3.59912	0.000319292	0.146413	0.156238	4.49653e-31	NA	76	88	88	0.0005503	0.227868
ENSG00000179344.16	HLA-DQB1	3.59361	0.000326128	0.451859	0.759278	6.45597e-302	NA	67	83	83	0.0001103	0.168824
ENSG00000169231.13	THBS3	3.54855	0.000387353	0.231629	0.329345	3.18855e-74	NA	24	28	28	0.0005112	0.756295
