# Supplementary material for: Novel risk loci for COVID-19 hospitalization among admixed American populations
Source: eLife. 2024 Oct 3;13:RP93666. doi: 10.7554/eLife.93666 (PMC11449485; doi:10.7554/eLife.93666)
Supplement: Supplementary file 11. — EA: effect allele; NEA: non-effect allele; EAF_avg: averaged effect allele frequency; FreqSE: standard error of averaged effect allele frequency. [file elife-93666-supp11.xlsx]

## Sheet: Supplementary Table 11.
Supplementary Table 11. Independent variants with p-value<1e-05 in the SC-HGI_ALL GWAS meta-analysis (hg38). EA: effect allele; NEA: non-effect allele; EAF_avg: averaged effect allele frequency; FreqSE: standard error of averaged effect allele frequency.
						SC-HGI_ALL meta-analysis							HGIB2_ALL						SC_LAT
SNP	CHR	POS	GENE	type	rsid	EA	NEA	beta	SE	pval	EAF_avg	FreqSE	NEA	EA	beta	SE	pval	EAF	NEA	EA	beta	SE	pval
1:154853813:A:G	1	154853813	KCNN3	intronic	rs139589338	a	g	-0.1913	0.0338	1.469e-08	0.8314	0.0159	A	G	0.19135	0.033938	1.717e-08		A	G	0.186431	0.337609	0.580804
1:155039663:G:A	1	155039663	DCST1	intronic	rs115888432	a	g	-0.1015	0.0225	6.26e-06	0.0002	0.0017	G	A	-0.098752	0.022564	1.2056e-05		G	A	-0.445383	0.251365	0.0764183
1:155041232:G:A	1	155041232	DCST1	intronic	rs79380792	a	g	-0.0906	0.0174	1.95e-07	0.0002	0.0023	G	A	-0.088065	0.017475	4.6659e-07		G	A	-0.467186	0.211612	0.0272622
1:155093927:C:T	1	155093927	EFNA3(dist=6389),EFNA1(dist=33949)	intergenic	rs138207102	t	c	0.1921	0.0368	1.717e-07	0.0001	0.0009	C	T	0.19151	0.036929	2.1494e-07		C	T	0.258684	0.379172	0.495091
1:155114935:G:A	1	155114935	EFNA3(dist=27397),EFNA1(dist=12941)	intergenic	rs34455078	a	g	-0.0767	0.0139	3.238e-08	-0.0667	0.0131	G	A	-0.076305	0.013933	4.3403e-08		G	A	-0.112726	0.141786	0.426588
1:155175305:G:A	1	155175305	TRIM46	intronic	rs7528026	a	g	0.1724	0.0254	1.054e-11	0.1287	0.0125	G	A	0.17211	0.025586	1.7328e-11		G	A	0.190456	0.191917	0.321008
1:155181260:A:T	1	155181260	TRIM46	intronic	rs115152457	a	t	0.2737	0.0568	1.429e-06	0.9996	0.0022	A	T	-0.26953	0.057692	2.9847e-06		A	T	-0.399341	0.318063	0.209283
1:155197995:A:G	1	155197995	THBS3	intronic	rs41264915	a	g	0.1318	0.0133	3.938e-23	1.1092	0.019	A	G	-0.13127	0.013369	9.3295e-23		A	G	-0.183074	0.134429	0.173243
1:155827874:T:C	1	155827874	GON4L	intronic	rs74188952	t	c	-0.079	0.0164	1.468e-06	0.9903	0.0493	T	C	0.07971	0.016721	1.8684e-06		T	C	0.0608903	0.0851516	0.474559
1:156126626:T:G	1	156126626	LMNA	intronic	rs594028	t	g	-0.0725	0.014	2.058e-07	0.9981	0.0148	T	G	0.074275	0.014076	1.3154e-07		T	G	-0.0373155	0.112017	0.739041
1:191981690:G:A	1	191981690	LINC01680(dist=753192),RGS18(dist=176772)	intergenic	rs7411141	a	g	0.0376	0.0084	7.148e-06	0.0071	0.0634	G	A	0.037434	0.0084286	8.9419e-06		A	G	-0.0506825	0.0748057	0.498074
1:204899420:A:AG	1	204899420	NFASC	intronic	rs35740789	a	ag	-0.0604	0.0133	5.227e-06	0.9856	0.0806	A	AG	0.057842	0.01347	1.7546e-05		A	AG	0.140266	0.0752392	0.0622849
1:205947571:G:A	1	205947571	SLC26A9-AS1	ncRNA_intronic	rs12047830	a	g	0.0424	0.0094	6.875e-06	0.0098	0.0743	G	A	0.041341	0.0095204	1.4094e-05		A	G	-0.105912	0.0720468	0.141551
1:228206228:C:A	1	228206228	OBSCN-AS1	ncRNA_exonic	rs7532924	a	c	0.0426	0.0084	3.514e-07	0.0077	0.066	C	A	0.043487	0.0084229	2.4307e-07		A	C	0.0218737	0.0724518	0.762723
1:243294474:G:T	1	243294474	SDCCAG8	intronic	rs12354170	t	g	-0.0741	0.0167	9.458e-06	0.0038	0.0227	G	T	-0.072459	0.016959	1.9332e-05		G	T	-0.130547	0.100489	0.193904
1:28658064:C:T	1	28658064	LINC01715(dist=9265),GMEB1(dist=10720)	intergenic	rs139449248	t	c	0.0904	0.0196	3.903e-06	0.0003	0.003	C	T	0.092467	0.019678	2.6133e-06		C	T	-0.123628	0.20074	0.537987
1:35583808:G:C	1	35583808	TFAP2E	intronic	rs6425949	c	g	0.0749	0.016	2.697e-06	0.0181	0.0836	G	C	0.072045	0.016338	1.035e-05		G	C	0.136001	0.0752641	0.0707646
1:46811056:G:C	1	46811056	CYP4B1	intronic	rs2297812	c	g	-0.0491	0.0087	1.436e-08	0.0057	0.0476	G	C	-0.047325	0.0087188	5.7025e-08		G	C	-0.17209	0.0730174	0.0184313
1:47731898:T:C	1	47731898	FOXD2(dist=291207),TRABD2B(dist=28630)	intergenic	rs12567716	t	c	0.0717	0.0138	1.997e-07	0.9983	0.0137	T	C	-0.074595	0.013896	7.9519e-08		T	C	0.113405	0.110992	0.306904
1:64947147:G:T	1	64947147	JAK1	intronic	rs11208552	t	g	-0.056	0.0091	8.079e-10	-0.0403	0.0535	G	T	-0.054975	0.0091889	2.194e-09		G	T	-0.124815	0.0743817	0.0933415
1:65517943:C:T	1	65517943	LEPR	intronic	rs11208660	t	c	0.0601	0.0136	9.836e-06	0.0013	0.0112	C	T	0.060891	0.01368	8.5451e-06		C	T	-0.00227309	0.120882	0.984997
1:77483438:G:A	1	77483438	AK5	intronic	rs7515509	a	g	0.0622	0.0089	2.206e-12	0.0585	0.0307	G	A	0.062296	0.0089243	2.9407e-12		G	A	0.0573969	0.0761311	0.450896
1:77984833:C:A	1	77984833	DNAJB4	intronic	rs34517439	a	c	0.0905	0.0151	1.97e-09	0.0793	0.0033	C	A	0.091877	0.015133	1.2684e-09		C	A	-0.100218	0.176051	0.569182
1:78320050:C:T	1	78320050	MGC27382	ncRNA_intronic	rs61778203	t	c	-0.0507	0.0111	4.666e-06	0.0022	0.0184	C	T	-0.049705	0.011142	8.1512e-06		C	T	-0.121376	0.0950875	0.20179
1:92577196:G:A	1	92577196	EVI5	intronic	rs115545251	a	g	0.1305	0.0261	5.5e-07	0.0002	0.0021	G	A	0.13032	0.026191	6.4974e-07		G	A	0.146429	0.25656	0.568175
1:96097966:G:A	1	96097966	LINC02790(dist=75086),LINC01787(dist=156103)	intergenic	rs9651212	a	g	0.1031	0.0233	9.963e-06	0.0003	0.003	G	A	0.099878	0.02347	2.0845e-05		G	A	0.378631	0.217359	0.0815148
10:112972548:C:A	10	112972548	TCF7L2	intronic	rs7897438	a	c	-0.0522	0.0098	9.212e-08	-0.0449	0.0406	C	A	-0.053738	0.009847	4.8342e-08		C	A	0.0468247	0.0788424	0.552577
10:12226538:G:A	10	12226538	CDC123	intronic	rs35828869	a	g	0.0433	0.0098	9.811e-06	0.0092	0.0661	G	A	0.043499	0.0098877	1.0859e-05		G	A	0.033083	0.0713518	0.642891
10:124565646:G:A	10	124565646	LHPP	intronic	rs12768929	a	g	0.0733	0.0152	1.317e-06	0.0048	0.0297	G	A	0.073459	0.015364	1.7425e-06		G	A	0.0692242	0.0941491	0.462181
10:30543771:T:C	10	30543771	MAP3K8(dist=81938),LYZL2(dist=68008)	intergenic	rs56307515	t	c	-0.0961	0.0184	1.902e-07	0.9988	0.0092	T	C	0.095906	0.018609	2.5521e-07		T	C	0.104043	0.137467	0.449135
10:31185614:T:C	10	31185614	ZNF438(dist=153677),LINC02664(dist=2269)	intergenic	rs10826920	t	c	-0.075	0.0152	7.524e-07	0.9988	0.0101	T	C	0.073502	0.015267	1.4755e-06		T	C	0.179168	0.127511	0.159985
10:66332261:G:A	10	66332261	CTNNA3	intronic	rs12766321	a	g	0.0533	0.0119	7.242e-06	0.0037	0.0272	G	A	0.049491	0.011984	3.6327e-05		G	A	0.25746	0.0880406	0.00345199
10:79468285:T:C	10	79468285	ZCCHC24(dist=22661),LOC729815(dist=38085)	intergenic	rs7909837	t	c	-0.0412	0.0093	9.422e-06	0.9929	0.055	T	C	0.04162	0.0093785	9.088e-06		T	C	0.0163035	0.0726905	0.822534
10:79645176:A:G	10	79645176	LINC02679	ncRNA_intronic	rs138722592	a	g	-0.0509	0.0109	3.075e-06	0.9976	0.0207	A	G	0.053792	0.010979	9.6029e-07		A	G	-0.161557	0.0937312	0.0847761
10:79963939:C:T	10	79963939	SFTPD(dist=14834),TMEM254-AS1(dist=82294)	intergenic	rs61860402	t	c	0.08	0.0119	1.592e-11	0.0757	0.0227	C	T	0.076982	0.011995	1.3813e-10		C	T	0.232794	0.0847794	0.00603497
11:10646094:A:G	11	10646094	IRAG1	intronic	rs2052692	a	g	-0.047	0.0094	5.821e-07	0.9915	0.0828	A	G	0.046915	0.0094642	7.154e-07		G	A	-0.0596583	0.0924478	0.518721
11:1219991:G:T	11	1219991	MUC5AC(dist=18853),MUC5B(dist=3075)	intergenic	rs35705950	t	g	-0.1024	0.0145	1.504e-12	-0.0919	0.0138	G	T	-0.10119	0.01454	3.4141e-12		G	T	-0.242627	0.155755	0.119292
11:127418775:C:T	11	127418775	LINC02712(dist=81742),LINC02098(dist=789991)	intergenic	rs73564538	t	c	0.1244	0.0281	9.368e-06	0.0132	0.0446	C	T	0.12501	0.029277	1.9551e-05		C	T	0.11796	0.0993884	0.235283
11:34438684:C:T	11	34438684	CAT(dist=250)	upstream	rs1001179	t	c	0.0482	0.0106	5.372e-06	0.0008	0.0092	C	T	0.048886	0.01064	4.3377e-06		C	T	-0.035605	0.119076	0.764931
11:34480495:C:T	11	34480495	ELF5	intronic	rs7949972	t	c	-0.087	0.0085	1.094e-24	-0.0692	0.0596	C	T	-0.087013	0.008542	2.2804e-24		C	T	-0.0857096	0.0710607	0.227761
11:34486581:T:C	11	34486581	ELF5	intronic	rs4755375	t	c	-0.0476	0.009	1.373e-07	0.991	0.0703	T	C	0.047646	0.0091079	1.6837e-07		C	T	-0.0448798	0.0713394	0.529282
11:34500102:C:T	11	34500102	ELF5	intronic	rs16930094	t	c	0.0662	0.0126	1.663e-07	0.0012	0.0109	C	T	0.065386	0.012725	2.7687e-07		C	T	0.134538	0.116413	0.247804
11:6957217:A:G	11	6957217	ZNF215(NM_001354858:c.*6860>0,NM_001354857:c.*6860>0,NM_001354856:c.*6860>0,NM_013250:c.*6860>0,NM_001354855:c.*6860>0,NM_001354853:c.*6860>0,NM_001354860:c.*6860>0,NM_001354859:c.*6860>0)	UTR3	rs10742995	a	g	-0.0406	0.0091	8.756e-06	0.9931	0.0536	A	G	0.040564	0.0092178	1.0796e-05		A	G	0.0456763	0.0717866	0.524595
12:107414722:C:T	12	107414722	BTBD11	intronic	rs11113315	t	c	0.0663	0.014	2.044e-06	0.0159	0.083	C	T	0.062992	0.014222	9.4541e-06		C	T	0.157476	0.0742586	0.0339515
12:112920989:C:T	12	112920989	OAS1	intronic	rs4767025	t	c	0.0756	0.0091	1.147e-16	0.0737	0.072	C	T	0.074702	0.0091585	3.4481e-16		T	C	-0.172764	0.096768	0.0742058
12:112927983:G:A	12	112927983	OAS1	intronic	rs10850101	a	g	0.0481	0.0102	2.429e-06	0.0053	0.0404	G	A	0.047524	0.010293	3.8881e-06		G	A	0.0812038	0.0778472	0.296894
12:132495777:C:G	12	132495777	FBRSL1	intronic	rs7315900	c	g	0.0489	0.0088	2.943e-08	1.0301	0.0438	C	G	-0.050579	0.0088856	1.2539e-08		C	G	0.0703807	0.0756373	0.352111
12:132565387:T:C	12	132565387	FBRSL1	intronic	rs5023077	t	c	0.0667	0.0084	2.169e-15	1.0479	0.0813	T	C	-0.066746	0.0084514	2.844e-15		C	T	0.0603331	0.0821913	0.462914
12:40784307:C:T	12	40784307	CNTN1	intronic	rs12424306	t	c	-0.0889	0.0199	7.675e-06	0.0004	0.0039	C	T	-0.092857	0.019988	3.3904e-06		C	T	0.242267	0.182792	0.185049
12:41137089:TG:T	12	41137089	CNTN1(dist=64674),PDZRN4(dist=51231)	intergenic	rs35233217	t	tg	0.1048	0.0234	7.769e-06	0.0009	0.0065	TG	T	0.10793	0.023663	5.0867e-06		TG	T	-0.0528944	0.166868	0.751256
13:112881427:C:T	13	112881427	ATP11A	intronic	rs12585036	t	c	0.0969	0.0102	3.05e-21	0.0783	0.0089	C	T	0.097378	0.010296	3.1503e-21		C	T	0.0514693	0.0974575	0.597416
13:112882153:G:A	13	112882153	ATP11A(NM_015205:c.*2870>0,NM_032189:c.*890>0)	UTR3	rs36048052	a	g	-0.0501	0.0103	1.067e-06	0.0051	0.0381	G	A	-0.04836	0.010355	3.0091e-06		G	A	-0.144028	0.0768173	0.0608005
14:103864095:C:A	14	103864095	LINC00637(dist=6046),ATP5MPL(dist=48193)	intergenic	rs10129899	a	c	-0.0477	0.0105	5.602e-06	0.0129	0.0902	C	A	-0.05052	0.010622	1.9737e-06		A	C	-0.0878751	0.0742917	0.236873
14:48943773:C:A	14	48943773	LINC00648(dist=1148759),RPS29(dist=627215)	intergenic	rs8181970	a	c	0.0528	0.0119	9.937e-06	0.0009	0.0093	C	A	0.053145	0.012007	9.5958e-06		C	A	0.0173995	0.119443	0.88418
14:89820376:A:G	14	89820376	EFCAB11	intronic	rs4904624	a	g	-0.0451	0.0099	5.644e-06	0.9908	0.0657	A	G	0.044681	0.010042	8.6171e-06		A	G	0.069224	0.0720994	0.336996
14:97907492:T:C	14	97907492	LINC02312(dist=144661),LINC01550(dist=18118)	intergenic	rs117293456	t	c	-0.1485	0.0303	9.156e-07	0.9999	0.0009	T	C	0.1525	0.030374	5.1435e-07		T	C	-0.355616	0.34183	0.298187
15:31515116:G:C	15	31515116	OTUD7A	intronic	rs60333545	c	g	0.081	0.0168	1.476e-06	0.0057	0.0316	G	C	0.082176	0.017099	1.5396e-06		G	C	0.0453009	0.0947336	0.632513
15:64135505:A:C	15	64135505	SNX1	intronic	rs12908340	a	c	-0.0462	0.0098	2.685e-06	0.9889	0.0818	A	C	0.047719	0.0099384	1.5751e-06		C	A	0.0350901	0.0732725	0.632011
15:74762525:G:C	15	74762525	CYP1A2(dist=5918),CSK(dist=19555)	intergenic	rs11072507	c	g	-0.0401	0.009	8.596e-06	0.0037	0.0326	G	C	-0.039875	0.0090699	1.1006e-05		G	C	-0.0578687	0.080109	0.470065
15:83776948:T:TG	15	83776948	ADAMTSL3	intronic	rs67503271	t	tg	-0.0502	0.0107	2.88e-06	0.9893	0.0928	T	TG	0.051348	0.010792	1.9563e-06		TG	T	0.0389322	0.0937112	0.677814
15:87545216:A:G	15	87545216	AGBL1(dist=516164),LINC00052(dist=31713)	intergenic	rs4887298	a	g	0.0481	0.0107	6.998e-06	0.997	0.0245	A	G	-0.046662	0.010783	1.5095e-05		A	G	-0.146357	0.0889962	0.100067
16:31396893:G:C	16	31396893	ITGAD	intronic	rs13339313	c	g	0.1761	0.0392	7.175e-06	0.0005	0.003	G	C	0.18266	0.039715	4.2417e-06		G	C	-0.0913566	0.253932	0.71902
16:3787893:G:C	16	3787893	CREBBP	intronic	rs77148607	c	g	0.1678	0.0317	1.227e-07	0.0004	0.003	G	C	0.16603	0.032026	2.1685e-07		G	C	0.264142	0.233977	0.25893
16:53885411:C:CTTGA	16	53885411	FTO	intronic	rs36007233	cttga	c	-0.1404	0.03	2.975e-06	0.0102	0.036	C	CTTGA	-0.1508	0.031224	1.369e-06		C	CTTGA	-0.0101306	0.110486	0.926943
16:54221310:T:C	16	54221310	FTO(dist=99369),LINC02169(dist=24236)	intergenic	rs2102497	t	c	-0.0515	0.0105	9.639e-07	0.9928	0.0801	T	C	0.052375	0.010547	6.8396e-07		C	T	0.0615841	0.11728	0.599513
16:75606623:T:C	16	75606623	ADAT1	intronic	rs60952428	t	c	0.0652	0.0131	6.782e-07	0.9901	0.0581	T	C	-0.070496	0.013322	1.2119e-07		T	C	0.117172	0.0785185	0.135623
16:75656381:A:G	16	75656381	TERF2IP	exonic	rs4888444	a	g	0.0982	0.0222	9.694e-06	0.9998	0.0017	A	G	-0.097594	0.022291	1.1967e-05		A	G	-0.176189	0.248869	0.478971
16:89196249:G:A	16	89196249	SLC22A31	exonic	rs117169628	a	g	0.1011	0.0127	1.874e-15	0.0814	0.003	G	A	0.098534	0.012798	1.3715e-14		G	A	0.294962	0.111773	0.00831666
16:89197046:T:C	16	89197046	SLC22A31	intronic	rs7188277	t	c	0.0518	0.0109	1.951e-06	0.9971	0.0234	T	C	-0.052271	0.010973	1.9012e-06		T	C	-0.0222823	0.0893056	0.802969
16:89262593:G:A	16	89262593	ZNF778(dist=25457),ANKRD11(dist=5039)	intergenic	rs3114857	a	g	0.0634	0.0125	3.975e-07	0.0059	0.0399	G	A	0.061793	0.012636	1.006e-06		G	A	0.136599	0.0857682	0.111237
17:11499339:A:G	17	11499339	SHISA6	intronic	rs3111833	a	g	-0.0383	0.0087	9.788e-06	0.9934	0.0537	A	G	0.037714	0.0087234	1.5375e-05		A	G	0.0767804	0.071402	0.282229
17:1453350:C:G	17	1453350	CRK	intronic	rs117985867	c	g	-0.0926	0.0204	5.56e-06	0.9998	0.0025	C	G	0.092393	0.020486	6.4818e-06		C	G	0.116898	0.211108	0.57976
17:16235835:T:C	17	16235835	PIGL	intronic	rs12945855	t	c	-0.0422	0.0085	6.857e-07	0.9957	0.0383	T	C	0.042679	0.0085474	5.9372e-07		T	C	0.00236072	0.0759378	0.9752
17:39909987:T:C	17	39909987	GSDMB	intronic	rs2290400	t	c	-0.0398	0.0081	9.875e-07	0.9946	0.0472	T	C	0.04	0.0081766	9.9801e-07		T	C	0.0212702	0.0718134	0.767088
17:40022374:A:G	17	40022374	MED24	intronic	rs3213762	a	g	0.0417	0.0085	9.348e-07	0.9954	0.0397	A	G	-0.039186	0.0085543	4.6298e-06		A	G	-0.227628	0.073873	0.00206064
17:44883641:C:T	17	44883641	EFTUD2	intronic	rs2289677	t	c	0.0384	0.0083	4.161e-06	0.0063	0.0539	C	T	0.038197	0.0083952	5.3679e-06		C	T	0.0515475	0.0713008	0.469706
17:45390086:CTGAG:C	17	45390086	MAP3K14(dist=73066),ARHGAP27(dist=3822)	intergenic	rs59079071	ctgag	c	-0.0509	0.0093	4.792e-08	0.9511	0.0372	CTGAG	C	0.052705	0.0093911	1.9977e-08		CTGAG	C	-0.0652567	0.074561	0.381458
17:45706997:TG:T	17	45706997	LINC02210-CRHR1	intronic	rs76969039	t	tg	0.0444	0.0095	2.789e-06	0.0061	0.0465	TG	T	0.04413	0.0095565	3.878e-06		TG	T	0.0606076	0.0733929	0.40892
17:45983409:C:T	17	45983409	MAPT	exonic	rs63750417	t	c	-0.0898	0.0108	1.173e-16	-0.0787	0.0213	C	T	-0.09096	0.010898	7.0453e-17		C	T	0.0175102	0.10596	0.868744
17:45997220:G:A	17	45997220	MAPT	intronic	rs12051901	a	g	0.0569	0.0099	9.36e-09	0.0537	0.0128	G	A	0.057325	0.009964	8.757e-09		G	A	0.0185729	0.093801	0.843043
17:46109586:T:C	17	46109586	KANSL1	intronic	rs9904766	t	c	0.0444	0.0093	1.773e-06	0.9899	0.0808	T	C	-0.046386	0.0093629	7.2623e-07		C	T	-0.0829301	0.0747044	0.266952
17:46939875:G:A	17	46939875	GOSR2(NM_001363851:c.*11150>0,NM_001330252:c.*11150>0,NM_001321134:c.*11150>0,NM_001353115:c.*11150>0,NM_001353114:c.*11150>0,NM_004287:c.*11150>0)	UTR3	rs758391	a	g	-0.0406	0.0083	8.787e-07	0.0041	0.0371	G	A	-0.04061	0.0083078	1.018e-06		G	A	-0.0397444	0.0747184	0.59478
17:47836287:C:T	17	47836287	LRRC46	intronic	rs11654648	t	c	-0.0905	0.0194	2.981e-06	0.0004	0.0039	C	T	-0.09154	0.019483	2.62e-06		C	T	0.00120058	0.185611	0.994839
17:49588349:C:T	17	49588349	NXPH3(dist=4522),SPOP(dist=10535)	intergenic	rs141458043	t	c	0.1403	0.0316	9.104e-06	0.0001	0.001	C	T	0.13658	0.031743	1.6864e-05		C	T	0.588731	0.349468	0.0920562
17:49863260:C:A	17	49863260	TAC4(dist=15243),DLX4(dist=105930)	intergenic	rs3848456	a	c	0.1883	0.0198	2.297e-21	0.1656	0.0001	C	A	0.19199	0.020254	2.5612e-21		C	A	0.10073	0.099371	0.310738
17:67817615:G:A	17	67817615	NOL11(dist=73084),BPTF(dist=7888)	intergenic	rs12602210	a	g	0.0763	0.0142	7.853e-08	0.0004	0.0043	G	A	0.073621	0.014266	2.4611e-07		G	A	0.430856	0.163359	0.00835259
17:67867234:C:A	17	67867234	BPTF	intronic	rs4790905	a	c	0.0516	0.0098	1.396e-07	0.0054	0.0417	C	A	0.050305	0.0098896	3.6445e-07		C	A	0.130142	0.075852	0.0862101
18:22436126:C:T	18	22436126	CTAGE1(dist=18211),LOC101927571(dist=287365)	intergenic	rs4800403	t	c	0.0521	0.0102	3.169e-07	0.0082	0.0609	C	T	0.054366	0.01029	1.2673e-07		C	T	-0.069936	0.0762131	0.358809
18:74521815:A:G	18	74521815	CNDP2(NM_018235:c.*17470>0,NM_001370249:c.*17470>0,NM_001370248:c.*17470>0,NM_001370254:c.*17470>0,NM_001370250:c.*17470>0,NM_001168499:c.*17470>0)	UTR3	rs72977800	a	g	-0.0822	0.0183	7.218e-06	0.9996	0.0041	A	G	0.085234	0.018422	3.7135e-06		A	G	-0.202534	0.17935	0.258787
19:10293551:C:G	19	10293551	ICAM5	intronic	rs2569703	c	g	0.0545	0.0083	4.514e-11	1.0329	0.073	C	G	-0.054561	0.008333	5.8489e-11		G	C	0.0520906	0.073111	0.476163
19:10305768:G:A	19	10305768	ZGLP1	intronic	rs73510898	a	g	0.1093	0.0156	2.664e-12	0.082	0.0031	G	A	0.10938	0.015688	3.1295e-12		G	A	0.0948627	0.168495	0.573436
19:10335892:T:C	19	10335892	ICAM3	exonic	rs2304237	t	c	0.0594	0.0105	1.375e-08	1.0494	0.0234	T	C	-0.059849	0.010534	1.3357e-08		T	C	-0.0253799	0.0961713	0.791854
19:10352442:G:C	19	10352442	TYK2	exonic	rs34536443	c	g	0.2326	0.0245	2.304e-21	0.1696	0.0142	G	C	0.23431	0.024613	1.7383e-21		G	C	0.0316541	0.266195	0.905344
19:10364976:C:A	19	10364976	TYK2	exonic	rs2304256	a	c	0.0805	0.0092	2.938e-18	0.0668	0.0161	C	A	0.080726	0.009295	3.7931e-18		C	A	0.0631808	0.0855929	0.46042
19:10714915:C:T	19	10714915	QTRT1(dist=1550),DNM2(dist=3138)	intergenic	rs36134945	t	c	-0.0393	0.0086	5.235e-06	0.0085	0.0721	C	T	-0.039212	0.0086801	6.2593e-06		T	C	0.0433208	0.073741	0.556887
19:1186560:C:T	19	1186560	SBNO2(dist=12292),STK11(dist=19218)	intergenic	rs66578645	t	c	0.0562	0.0111	3.889e-07	0.0079	0.0527	C	T	0.057404	0.011209	3.0311e-07		C	T	0.004863	0.0747716	0.948144
19:4063488:C:T	19	4063488	ZBTB7A	intronic	rs66833742	t	c	-0.06	0.0108	2.503e-08	0.0019	0.0178	C	T	-0.058863	0.010831	5.488e-08		C	T	-0.154936	0.0988615	0.117069
19:45869791:ATT:A	19	45869791	FOXA3	intronic	rs202075556	a	att	0.0621	0.0108	8.744e-09	0.0549	0.0245	ATT	A	0.062102	0.010883	1.156e-08		ATT	A	0.0631897	0.0859736	0.462345
19:4589178:T:C	19	4589178	SEMA6B(dist=29494),TNFAIP8L1(dist=50338)	intergenic	rs7507309	t	c	0.0557	0.0113	8.643e-07	0.9855	0.1028	T	C	-0.053289	0.011429	3.1213e-06		C	T	0.175859	0.0809944	0.0299119
19:4617760:G:C	19	4617760	SEMA6B(dist=58076),TNFAIP8L1(dist=21756)	intergenic	rs34597915	c	g	-0.0406	0.0089	5.128e-06	0.008	0.0636	G	C	-0.039437	0.0089835	1.134e-05		C	G	0.116263	0.0712686	0.102819
19:4656387:A:G	19	4656387	TNFAIP8L1(dist=819)	downstream	rs75895857	a	g	-0.1275	0.0265	1.458e-06	0.9999	0.0009	A	G	0.12895	0.026551	1.1939e-06		A	G	-0.0924138	0.322693	0.774585
19:4692342:G:C	19	4692342	DPP9	intronic	rs10406145	c	g	-0.0667	0.0099	1.502e-11	-0.0469	0.0439	G	C	-0.065057	0.0099614	6.538e-11		G	C	-0.165028	0.0777437	0.0337775
19:4717660:A:G	19	4717660	DPP9	intronic	rs12610495	a	g	-0.1507	0.0098	2.239e-53	0.8851	0.0135	A	G	0.1499	0.0098675	4.0601e-52		A	G	0.201566	0.0812157	0.0130697
19:4729735:T:C	19	4729735	DPP9(dist=5893),MIR7-3HG(dist=39370)	intergenic	rs138567877	t	c	-0.1494	0.0314	1.932e-06	0.9999	0.0013	T	C	0.14961	0.031543	2.1064e-06		T	C	0.126906	0.307041	0.679372
19:4740408:AT:A	19	4740408	DPP9(dist=16566),MIR7-3HG(dist=28697)	intergenic	NA	a	at	-0.0642	0.0134	1.62e-06	0.0118	0.0641	AT	A	-0.067363	0.013611	7.451e-07		AT	A	0.0292012	0.0739188	0.69281
19:48700572:C:T	19	48700572	FUT2	intronic	rs35106244	t	c	-0.0657	0.0098	1.863e-11	-0.0488	0.0275	C	T	-0.066985	0.0098406	9.9662e-12		C	T	0.0413583	0.0898291	0.645221
19:48867352:G:T	19	48867352	PLEKHA4	intronic	rs4801778	t	g	-0.0517	0.0114	5.737e-06	0.001	0.0102	G	T	-0.051218	0.011457	7.807e-06		G	T	-0.102048	0.115492	0.376916
19:50379362:T:C	19	50379362	NR1H2	intronic	rs1405655	t	c	-0.078	0.0087	2.439e-19	0.9202	0.0496	T	C	0.077686	0.0087352	5.9235e-19		T	C	0.0958272	0.0710706	0.177549
19:56086817:C:T	19	56086817	ZNF787(dist=549)	downstream	rs117328378	t	c	-0.1417	0.0287	7.863e-07	0.0002	0.0017	C	T	-0.14245	0.028858	7.967e-07		C	T	-0.0775131	0.272642	0.776178
19:6841055:G:A	19	6841055	VAV1	intronic	rs10414323	a	g	-0.1645	0.0347	2.14e-06	0.0014	0.0072	G	A	-0.15562	0.035346	1.0684e-05		G	A	-0.406231	0.184125	0.0273648
2:115690736:T:A	2	115690736	DPP10	intronic	rs62155262	a	t	0.0634	0.0143	8.749e-06	0.0005	0.0057	T	A	0.062464	0.014336	1.3182e-05		T	A	0.169034	0.148814	0.256012
2:136051463:A:T	2	136051463	DARS-AS1(dist=43921),CXCR4(dist=62886)	intergenic	rs11678022	a	t	0.0455	0.0103	9.727e-06	0.9959	0.032	A	T	-0.046735	0.010364	6.5011e-06		A	T	0.0327777	0.0817628	0.688502
2:142119512:C:A	2	142119512	LRP1B	intronic	rs4662398	a	c	-0.0705	0.014	4.988e-07	0.0099	0.0951	C	A	-0.071087	0.014102	4.6358e-07		A	C	0.0167971	0.136041	0.901734
2:165156244:C:T	2	165156244	SCN3A	intronic	rs79762515	t	c	-0.0593	0.0133	8.782e-06	0.0007	0.0073	C	T	-0.059024	0.013413	1.0802e-05		C	T	-0.0900933	0.134612	0.503316
2:175717108:A:G	2	175717108	ATP5MC3(dist=535398),LNPK(dist=206774)	intergenic	rs13024151	a	g	-0.0475	0.01	2.114e-06	0.9949	0.0406	A	G	0.049032	0.010099	1.2033e-06		A	G	-0.0481699	0.0802392	0.548287
2:197408867:C:T	2	197408867	SF3B1	intronic	rs12151726	t	c	0.0501	0.0089	1.846e-08	0.0501	0.0366	C	T	0.049296	0.0089755	3.9683e-08		C	T	0.107936	0.0745932	0.147899
2:26619278:C:G	2	26619278	CIB4	intronic	rs732990	c	g	-0.0519	0.0088	3.916e-09	0.9456	0.0394	C	G	0.051356	0.008871	7.0748e-09		C	G	0.0861434	0.0735809	0.241708
2:60480453:A:G	2	60480453	BCL11A	intronic	rs1123573	a	g	0.0714	0.0093	1.216e-14	1.054	0.0299	A	G	-0.071705	0.0093078	1.322e-14		A	G	-0.0443156	0.0863843	0.607947
2:62522865:A:G	2	62522865	TMEM17(dist=16670),EHBP1(dist=151013)	intergenic	rs75111840	a	g	-0.1159	0.0258	6.804e-06	0.9995	0.004	A	G	0.11955	0.025952	4.0925e-06		A	G	-0.123241	0.209918	0.557144
20:15211123:C:T	20	15211123	MACROD2	intronic	rs175263	t	c	0.0502	0.0111	5.969e-06	0.0025	0.0209	C	T	0.049856	0.011174	8.1323e-06		C	T	0.0759251	0.0928841	0.41369
20:23810913:G:A	20	23810913	CST1(dist=59978),CST2(dist=12856)	intergenic	rs139383547	a	g	0.1844	0.0385	1.649e-06	0.0001	0.0013	G	A	0.18153	0.038737	2.7837e-06		G	A	0.406789	0.338722	0.22977
20:33689009:T:C	20	33689009	E2F1(dist=2624),PXMP4(dist=13750)	intergenic	rs6141997	t	c	-0.088	0.0189	3.065e-06	0.9997	0.0028	T	C	0.087696	0.018939	3.6487e-06		T	C	0.12359	0.204617	0.545841
20:38794186:G:A	20	38794186	ACTR5(dist=21667),PPP1R16B(dist=11511)	intergenic	rs4456761	a	g	0.048	0.0106	6.365e-06	0.0128	0.0963	G	A	0.047307	0.010718	1.016e-05		A	G	-0.085053	0.080804	0.292531
20:42987870:A:G	20	42987870	PTPRT	intronic	rs2903624	a	g	-0.0364	0.0082	9.248e-06	0.9941	0.0506	A	G	0.03879	0.0082651	2.6888e-06		A	G	-0.13728	0.0704269	0.0512646
20:59025600:G:C	20	59025600	ATP5F1E(NM_006886:c.*32450>0),TUBB1(NM_030773:c.*8170>0)	UTR3	rs10485828	c	g	-0.0574	0.0124	3.836e-06	0.002	0.0166	G	C	-0.056574	0.012518	6.1998e-06		G	C	-0.113782	0.102786	0.2683
20:6492834:T:A	20	6492834	CASC20	ncRNA_intronic	rs2876034	a	t	-0.0472	0.0085	2.834e-08	0.0072	0.0604	T	A	-0.046599	0.0085532	5.0885e-08		A	T	0.0862361	0.0719962	0.231
21:33185858:A:G	21	33185858	LINC01548(dist=15622),IFNAR2(dist=44037)	intergenic	rs1475836	a	g	-0.1419	0.0286	6.657e-07	0.9897	0.0999	A	G	0.13552	0.028704	2.343e-06		G	A	-0.750383	0.279361	0.00722991
21:33203593:G:A	21	33203593	LINC01548(dist=33357),IFNAR2(dist=26302)	intergenic	rs2834139	a	g	-0.0593	0.0102	5.197e-09	-0.0489	0.0346	G	A	-0.059951	0.010227	4.5787e-09		G	A	-0.01517	0.0836773	0.856139
21:33220158:T:C	21	33220158	LINC01548(dist=49922),IFNAR2(dist=9737)	intergenic	rs112268545	t	c	-0.1209	0.0252	1.592e-06	0.9998	0.0017	T	C	0.11929	0.025306	2.432e-06		T	C	0.296075	0.264087	0.262234
21:33237639:A:G	21	33237639	IFNAR2	intronic	rs9636867	a	g	-0.1314	0.0087	1.892e-51	0.8849	0.0417	A	G	0.13121	0.0087727	1.4086e-50		A	G	0.143888	0.0716713	0.0446844
21:33239403:A:G	21	33239403	IFNAR2	intronic	rs9978157	a	g	0.0897	0.0138	8.319e-11	1.0775	0.0174	A	G	-0.08966	0.013893	1.0931e-10		A	G	-0.0934576	0.128007	0.465331
21:33248442:G:C	21	33248442	IFNAR2	intronic	rs7277142	c	g	0.1354	0.022	7.622e-10	0.1211	0.0098	G	C	0.13597	0.022134	8.084e-10		G	C	0.0869172	0.209633	0.678423
21:33278486:A:G	21	33278486	IL10RB	intronic	rs2834168	a	g	-0.0631	0.009	2.398e-12	0.9435	0.0211	A	G	0.062226	0.0090651	6.6785e-12		A	G	0.138041	0.0816116	0.090754
21:33448802:A:G	21	33448802	TMEM50B(dist=339)	downstream	rs8134061	a	g	0.0446	0.01	9.069e-06	0.9977	0.0204	A	G	-0.044792	0.010105	9.3122e-06		A	G	-0.0269702	0.0913211	0.767739
21:33629979:A:G	21	33629979	CRYZL1	intronic	rs2154503	a	g	-0.0392	0.0087	7.355e-06	0.9956	0.0374	A	G	0.038496	0.0088019	1.2224e-05		A	G	0.0891831	0.0747415	0.232783
21:33770243:A:G	21	33770243	ITSN1	intronic	rs146830693	a	g	-0.1386	0.0305	5.58e-06	0.9999	0.0009	A	G	0.13574	0.030639	9.4155e-06		A	G	0.469132	0.33154	0.157067
21:33916942:G:A	21	33916942	ATP5PO(dist=1138),LINC00649(dist=14180)	intergenic	rs2834301	a	g	0.0425	0.0093	4.278e-06	0.0098	0.0782	G	A	0.043622	0.0093267	2.9102e-06		A	G	0.0263861	0.0747464	0.724083
21:33933958:A:AC	21	33933958	LINC00649	ncRNA_intronic	rs35751524	a	ac	0.053	0.0106	5.698e-07	0.9987	0.0126	A	AC	-0.051475	0.01066	1.3726e-06		A	AC	-0.21009	0.106527	0.0485902
21:33980963:C:T	21	33980963	LOC101928126(dist=3272),SLC5A3(dist=92615)	intergenic	rs76608815	t	c	0.1357	0.014	3.223e-22	0.1166	0.0113	C	T	0.13283	0.014161	6.597e-21		C	T	0.259028	0.0928789	0.00528907
21:34010734:G:A	21	34010734	LOC101928126(dist=33043),SLC5A3(dist=62844)	intergenic	rs7276741	a	g	0.0393	0.0088	7.955e-06	0.0038	0.0333	G	A	0.040871	0.0088523	3.8933e-06		G	A	-0.0824928	0.0775069	0.28718
21:34139647:G:A	21	34139647	MRPS6	intronic	rs57398791	a	g	-0.07	0.0147	2.008e-06	0.0012	0.01	G	A	-0.068145	0.014818	4.2471e-06		G	A	-0.203978	0.127571	0.109835
21:36822398:G:A	21	36822398	HLCS	intronic	rs7280357	a	g	-0.0477	0.0102	3.258e-06	0.002	0.0185	G	A	-0.047337	0.010301	4.3193e-06		G	A	-0.0748214	0.0947191	0.429569
21:41480570:C:T	21	41480570	TMPRSS2	exonic	rs12329760	t	c	-0.0556	0.0099	1.624e-08	-0.0483	0.017	C	T	-0.055389	0.0098937	2.1636e-08		C	T	-0.0848371	0.106725	0.426663
21:41485974:C:T	21	41485974	TMPRSS2	intronic	rs62217531	t	c	0.0422	0.0085	7.75e-07	0.0034	0.0312	C	T	0.04303	0.0085986	5.6078e-07		C	T	-0.0246946	0.0792892	0.755459
21:44462240:C:T	21	44462240	LRRC3(dist=44)	downstream	rs2236676	t	c	-0.0475	0.0105	6.011e-06	0.0129	0.0895	C	T	-0.047118	0.010612	8.9947e-06		T	C	0.067477	0.0733708	0.357745
22:29161304:G:A	22	29161304	KREMEN1	intronic	rs132307	a	g	-0.0514	0.0112	4.315e-06	0.0077	0.0511	G	A	-0.050078	0.011303	9.3946e-06		G	A	-0.109173	0.075535	0.148365
3:101780431:T:C	3	101780431	NXPE3	intronic	rs17412601	t	c	0.0664	0.009	1.52e-13	1.0555	0.0346	T	C	-0.066775	0.0090438	1.5416e-13		T	C	-0.0346166	0.0799438	0.665007
3:113201061:G:A	3	113201061	LINC02044(dist=33330),BOC(dist=10496)	intergenic	rs113557555	a	g	0.1196	0.0268	7.891e-06	0.0001	0.0012	G	A	0.11738	0.026865	1.2458e-05		G	A	0.429298	0.316806	0.175391
3:126404106:G:T	3	126404106	CFAP100	intronic	rs9824351	t	g	-0.1168	0.0263	8.616e-06	0.0057	0.0246	G	T	-0.11576	0.026964	1.7607e-05		G	T	-0.136701	0.115688	0.237353
3:136413469:T:A	3	136413469	STAG1	intronic	rs75208555	a	t	0.1375	0.0306	6.937e-06	0.0016	0.0085	T	A	0.15103	0.031105	1.2002e-06		T	A	-0.254816	0.16738	0.127913
3:145089259:G:A	3	145089259	DIPK2A(dist=1096891),LNCSRLR(dist=977085)	intergenic	rs7646371	a	g	0.0861	0.0193	8.585e-06	0.0002	0.0023	G	A	0.088553	0.019423	5.1374e-06		G	A	-0.228333	0.219799	0.298886
3:146514682:C:T	3	146514682	PLSCR1(dist=498)	downstream	rs454645	t	c	0.0852	0.0152	2.203e-08	0.0618	0	C	T	0.086188	0.015314	1.8213e-08		C	T	-0.00430046	0.148124	0.976838
3:156447887:A:C	3	156447887	KCNAB1	intronic	rs115700976	a	c	-0.1674	0.035	1.787e-06	0.9999	0.0013	A	C	0.16732	0.035267	2.0926e-06		A	C	0.172145	0.313119	0.582475
3:169005497:A:C	3	169005497	LINC02082(dist=83504),MECOM(dist=78002)	intergenic	rs2421077	a	c	0.0508	0.0104	9.426e-07	0.9897	0.091	A	C	-0.051255	0.010425	8.8101e-07		C	A	0.0145754	0.0925058	0.874802
3:169361405:T:C	3	169361405	MECOM	intronic	rs1430435	t	c	-0.0434	0.0083	1.545e-07	0.9929	0.0707	T	C	0.042019	0.008309	4.2579e-07		C	T	-0.180419	0.0832978	0.0303146
3:188862098:A:T	3	188862098	LPP	intronic	rs9831757	a	t	-0.0499	0.0105	1.995e-06	0.9894	0.0743	A	T	0.050993	0.010601	1.5065e-06		T	A	0.00438646	0.074488	0.953041
3:23168992:TG:T	3	23168992	ZNF385D-AS2(dist=1189164),UBE2E2-AS1(dist=26079)	intergenic	rs10712160	t	tg	0.0444	0.0099	6.556e-06	0.0085	0.0629	TG	T	0.042759	0.0099398	1.6941e-05		TG	T	0.135496	0.0739333	0.0668506
3:45297145:A:G	3	45297145	TMEM158(dist=70858),LARS2(dist=91431)	intergenic	rs17573676	a	g	-0.0904	0.0197	4.65e-06	0.9998	0.0024	A	G	0.091881	0.019821	3.5617e-06		A	G	-0.0904039	0.220077	0.681232
3:45373826:C:T	3	45373826	TMEM158(dist=147539),LARS2(dist=14750)	intergenic	rs13059329	t	c	-0.05	0.0091	4.414e-08	-0.0308	0.0463	C	T	-0.05041	0.0092125	4.4516e-08		C	T	-0.0260024	0.0737984	0.72458
3:45708708:C:T	3	45708708	SACM1L	intronic	rs73058468	t	c	-0.1017	0.0133	2.43e-14	-0.0772	0.014	C	T	-0.099673	0.013395	9.9882e-14		C	T	-0.314843	0.138419	0.0229321
3:45729730:C:T	3	45729730	SACM1L	intronic	rs2673065	t	c	-0.0484	0.0083	4.855e-09	-0.0293	0.0539	C	T	-0.047541	0.008323	1.1164e-08		C	T	-0.111404	0.0719532	0.121553
3:45756734:C:T	3	45756734	SLC6A20(NM_020208:c.*22440>0,NM_022405:c.*22440>0,NM_001385683:c.*22440>0)	UTR3	rs17213127	t	c	0.3067	0.0221	8.621e-44	0.2335	0.0202	C	T	0.30563	0.022201	4.0781e-43		C	T	0.428917	0.234167	0.0670009
3:45777388:G:C	3	45777388	SLC6A20	intronic	rs7650511	c	g	0.1291	0.0139	1.764e-20	0.094	0.0217	G	C	0.1329	0.014108	4.5096e-21		G	C	-0.0079208	0.0843711	0.925204
3:45795331:AT:A	3	45795331	SLC6A20	intronic	rs755403771	a	at	0.0867	0.0126	5.43e-12	0.0931	0.1017	AT	A	0.088518	0.012708	3.2764e-12		A	AT	-0.00124015	0.086631	0.988578
3:45796521:G:T	3	45796521	SLC6A20(NM_020208:c.-1020>0,NM_022405:c.-1020>0,NM_001385683:c.-1020>0)	UTR5	rs2271616	t	g	0.1322	0.0131	4.41e-24	0.1042	0.001	G	T	0.13111	0.013138	1.8791e-23		G	T	0.225511	0.121109	0.0625956
3:45796808:G:A	3	45796808	SLC6A20(dist=272)	upstream	rs2531743	a	g	0.0731	0.009	5.261e-16	0.0681	0.0729	G	A	0.073185	0.0090783	7.5387e-16		A	G	-0.0662585	0.0783361	0.397651
3:45807778:T:G	3	45807778	SLC6A20(dist=11242),LZTFL1(dist=15540)	intergenic	rs9843503	t	g	0.0855	0.0186	4.294e-06	0.9995	0.0047	T	G	-0.084144	0.018715	6.9213e-06		T	G	-0.206017	0.174232	0.237033
3:45847198:A:G	3	45847198	LZTFL1	intronic	rs34288077	a	g	-0.4921	0.0155	1.17e-220	0.6214	0.0336	A	G	0.49191	0.015605	4.3591e-218		A	G	0.509613	0.148355	0.000592374
3:45847464:T:G	3	45847464	LZTFL1	intronic	rs11712469	t	g	-0.0779	0.0091	1.335e-17	0.9286	0.0748	T	G	0.076738	0.0091764	6.1398e-17		G	T	-0.172699	0.0829885	0.0374335
3:45848095:G:T	3	45848095	LZTFL1	intronic	rs141146648	t	g	-0.1209	0.0273	9.264e-06	0.0003	0.0025	G	T	-0.12262	0.027434	7.8383e-06		G	T	0.0175953	0.244278	0.942578
3:45863056:C:G	3	45863056	LZTFL1	intronic	rs71325089	c	g	0.087	0.0133	5.486e-11	1.067	0.0133	C	G	-0.088731	0.013327	2.7754e-11		C	G	0.10067	0.138061	0.465896
3:45936981:A:G	3	45936981	FYCO1	intronic	rs11130079	a	g	-0.0919	0.0195	2.307e-06	0.993	0.0824	A	G	0.093476	0.019532	1.7034e-06		G	A	0.119989	0.230018	0.601913
3:45993299:T:C	3	45993299	FYCO1	intronic	rs1392288	t	c	-0.086	0.0099	3.454e-18	0.9174	0.08	T	C	0.086241	0.0099567	4.651e-18		C	T	-0.0687382	0.0867334	0.428056
3:46027272:A:C	3	46027272	XCR1	intronic	rs7623460	a	c	-0.1168	0.0087	1.756e-41	0.9146	0.0273	A	C	0.11551	0.0087102	3.886e-40		A	C	0.211586	0.0761284	0.00544713
3:46218953:G:A	3	46218953	CCR1(dist=10640),CCR3(dist=23428)	intergenic	rs34759782	a	g	0.1665	0.0128	1.341e-38	0.1256	0.0001	G	A	0.16892	0.012902	3.6123e-39		G	A	-0.00811493	0.108964	0.940633
3:46220844:A:T	3	46220844	CCR1(dist=12531),CCR3(dist=21537)	intergenic	rs73074163	a	t	0.0846	0.0172	9.445e-07	0.9997	0.0035	A	T	-0.082443	0.017325	1.9498e-06		A	T	-0.32562	0.184445	0.0774958
3:46230671:G:T	3	46230671	CCR1(dist=22358),CCR3(dist=11710)	intergenic	rs1542756	t	g	0.197	0.0145	8.088e-42	0.1484	0.0021	G	T	0.20153	0.014685	7.3604e-43		G	T	-0.0303599	0.104171	0.770714
3:46298256:CAAGTT:C	3	46298256	CCR3(dist=31550),CCR2(dist=55488)	intergenic	rs57008264	caagtt	c	0.061	0.0102	2.394e-09	1.0437	0.0241	CAAGTT	C	-0.059047	0.010291	9.5859e-09		CAAGTT	C	-0.219559	0.0917921	0.0167608
3:46309955:G:T	3	46309955	CCR3(dist=43249),CCR2(dist=43789)	intergenic	rs6767895	t	g	-0.0775	0.0089	3.898e-18	-0.0491	0.0866	G	T	-0.076866	0.0089905	1.2342e-17		T	G	0.12981	0.0786761	0.0989571
3:46348208:G:A	3	46348208	CCR3(dist=81502),CCR2(dist=5536)	intergenic	rs149125253	a	g	0.1395	0.0237	4.225e-09	0.1242	0.0103	G	A	0.13531	0.023863	1.425e-08		G	A	0.577882	0.243247	0.0175156
3:46437445:CA:C	3	46437445	LTF	intronic	rs34455820	ca	c	-0.0503	0.0105	1.835e-06	0.9974	0.0218	CA	C	0.048648	0.010609	4.5248e-06		CA	C	0.168144	0.0904644	0.0630736
3:46442226:T:G	3	46442226	LTF	intronic	rs3828477	t	g	-0.0713	0.0099	5.823e-13	0.9414	0.0206	T	G	0.071993	0.0099731	5.247e-13		T	G	0.0258114	0.0839166	0.758399
3:46484897:C:T	3	46484897	LTF	intronic	rs73067779	t	c	0.1299	0.0155	4.776e-17	0.0872	0.0041	C	T	0.12817	0.01554	1.6135e-16		C	T	0.373212	0.182143	0.0404619
3:48153360:CTAAT:C	3	48153360	MAP4(dist=64512),CDC25A(dist=3786)	intergenic	rs34082492	ctaat	c	-0.0468	0.0097	1.541e-06	0.9889	0.0818	CTAAT	C	0.048975	0.009835	6.37e-07		C	CTAAT	0.0701539	0.0728135	0.335309
4:102267552:C:T	4	102267552	SLC39A8	exonic	rs13107325	t	c	0.0896	0.0169	1.256e-07	0.0004	0.0042	C	T	0.090344	0.017033	1.1324e-07		C	T	0.0136297	0.167916	0.935307
4:105282863:A:C	4	105282863	TET2-AS1	ncRNA_intronic	rs2647251	a	c	-0.0399	0.009	8.892e-06	0.9974	0.0244	A	C	0.039002	0.0090368	1.5898e-05		A	C	0.119057	0.0840811	0.156783
4:105669137:T:G	4	105669137	ARHGEF38	intronic	rs115599607	t	g	-0.0843	0.0176	1.64e-06	0.9995	0.0047	T	G	0.086229	0.017676	1.07e-06		T	G	-0.0957106	0.169466	0.572225
4:105897896:G:A	4	105897896	NPNT	intronic	rs34712979	a	g	-0.0622	0.011	1.479e-08	-0.0417	0.0135	G	A	-0.06072	0.011036	3.7572e-08		G	A	-0.232568	0.117112	0.0470495
4:106867781:A:AT	4	106867781	LINC02173(dist=414334),DKK2(dist=54021)	intergenic	rs202188157	a	at	-0.1634	0.0361	6.113e-06	0.9998	0.0015	A	AT	0.16745	0.036369	4.1394e-06		A	AT	-0.142627	0.316109	0.651848
4:107808529:C:T	4	107808529	PAPSS1(dist=88295),SGMS2(dist=16034)	intergenic	rs143556778	t	c	0.118	0.024	9.319e-07	0.0001	0.001	C	T	0.1194	0.024124	7.4456e-07		C	T	-0.110597	0.305238	0.717104
4:12085139:A:G	4	12085139	MIR12113(dist=301891),LINC02270(dist=138312)	intergenic	rs140734723	a	g	-0.1074	0.0241	8.346e-06	0.9996	0.0032	A	G	0.10669	0.024248	1.0824e-05		A	G	0.158312	0.212397	0.456055
4:133482030:C:T	4	133482030	PCDH10(dist=287330),PABPC4L(dist=714304)	intergenic	rs17025197	t	c	0.0788	0.0177	8.838e-06	0.0023	0.0153	C	T	0.082448	0.017928	4.2476e-06		C	T	-0.0790894	0.117155	0.499624
4:25308729:C:T	4	25308729	PI4K2B(dist=29525),ZCCHC4(dist=4045)	intergenic	rs316807	t	c	-0.0569	0.0095	1.855e-09	-0.0407	0.0891	C	T	-0.056863	0.0095467	2.5795e-09		T	C	0.0607472	0.0756166	0.421768
4:25319105:C:T	4	25319105	ZCCHC4	intronic	rs115257276	t	c	0.0993	0.0175	1.422e-08	0.0924	0.0049	C	T	0.09657	0.017608	4.15e-08		C	T	0.332572	0.163503	0.0419475
4:25447603:G:A	4	25447603	ANAPC4(dist=29105),LOC101929161(dist=83437)	intergenic	rs7671107	a	g	-0.0714	0.0101	1.636e-12	-0.0516	0.0987	G	A	-0.071892	0.010204	1.844e-12		A	G	0.0455006	0.0760529	0.549656
4:25483013:T:C	4	25483013	ANAPC4(dist=64515),LOC101929161(dist=48027)	intergenic	rs35816121	t	c	0.056	0.0123	5.141e-06	0.9934	0.0419	T	C	-0.056292	0.012447	6.1087e-06		T	C	-0.0462542	0.0785513	0.555968
4:82165819:G:C	4	82165819	RASGEF1B(dist=693912),HNRNPD(dist=186679)	intergenic	rs2087830	c	g	0.0429	0.0095	5.54e-06	0.0053	0.0417	G	C	0.042823	0.0095294	6.9982e-06		G	C	0.050568	0.0747699	0.498841
5:132073149:A:C	5	132073149	CSF2(dist=640)	upstream	rs1469149	a	c	0.0454	0.0088	2.356e-07	0.9965	0.0314	A	C	-0.044107	0.0088335	5.9392e-07		A	C	-0.14556	0.0785794	0.0639693
5:132075767:T:C	5	132075767	CSF2	exonic	rs25882	t	c	-0.0589	0.0097	1.315e-09	0.9551	0.0239	T	C	0.058019	0.0097694	2.8698e-09		T	C	0.120224	0.0836362	0.150585
5:132441275:T:C	5	132441275	IRF1-AS1	ncRNA_intronic	rs10066378	t	c	-0.0744	0.0115	9.887e-11	0.9461	0.0087	T	C	0.074001	0.011575	1.625e-10		T	C	0.110941	0.106241	0.296372
5:156245985:C:G	5	156245985	KIF4B(dist=1227851),SGCD(dist=81179)	intergenic	rs30280	c	g	-0.0428	0.0094	4.734e-06	0.996	0.0336	C	G	0.040138	0.0094155	2.017e-05		C	G	0.234061	0.0799321	0.00340874
5:161483653:T:C	5	161483653	GABRB2	intronic	rs2964772	t	c	-0.1021	0.0228	7.725e-06	0.98	0.1361	T	C	0.098368	0.02308	2.0265e-05		C	T	-0.275503	0.156731	0.07878
5:179297726:T:C	5	179297726	ADAMTS2	intronic	rs467053	t	c	0.039	0.0087	6.631e-06	0.9931	0.0557	T	C	-0.039479	0.0087241	6.0295e-06		T	C	-0.00806117	0.0707303	0.909261
5:35644519:T:C	5	35644519	SPEF2	exonic	rs7706444	t	c	-0.0435	0.0094	3.705e-06	0.9904	0.0847	T	C	0.044404	0.0094666	2.7246e-06		C	T	0.0245796	0.0833046	0.767951
5:35678153:T:C	5	35678153	SPEF2	intronic	rs115013202	t	c	-0.0859	0.0192	7.936e-06	0.9997	0.0029	T	C	0.084766	0.019312	1.1369e-05		T	C	0.220125	0.209908	0.294328
5:43491580:TTA:T	5	43491580	C5orf34	intronic	rs34724911	t	tta	0.0402	0.009	7.239e-06	0.0054	0.0447	TTA	T	0.040559	0.0090219	6.9358e-06		TTA	T	0.0146128	0.0743095	0.844103
5:732767:C:T	5	732767	ZDHHC11B	intronic	rs55724150	t	c	-0.0661	0.0145	5.2e-06	0.0013	0.0106	C	T	-0.066987	0.014602	4.4892e-06		C	T	-0.00161604	0.121901	0.989423
6:108949348:G:A	6	108949348	ARMC2	intronic	rs2768552	a	g	-0.0459	0.0094	9.219e-07	0.0059	0.0457	G	A	-0.046062	0.0094343	1.0477e-06		G	A	-0.0373536	0.0731521	0.609611
6:138173051:A:C	6	138173051	ARFGEF3	intronic	rs12191707	a	c	0.0442	0.0093	2.136e-06	0.9946	0.0436	A	C	-0.043934	0.0094038	2.9838e-06		A	C	-0.0632942	0.0752706	0.40041
6:21638263:AT:A	6	21638263	SOX4(dist=39645),CASC15(dist=28150)	intergenic	NA	a	at	0.1976	0.0443	8.014e-06	0.0024	0.0096	AT	A	0.18315	0.045593	5.8949e-05		AT	A	0.432555	0.183948	0.0186974
6:26022164:C:T	6	26022164	H4C1(dist=114)	downstream	rs75397441	t	c	-0.0736	0.0166	9.095e-06	0.0002	0.0026	C	T	-0.074276	0.016637	8.0245e-06		C	T	0.0282373	0.200737	0.888132
6:29947491:C:T	6	29947491	HLA-A(dist=1607),HCG9(dist=27624)	intergenic	rs2517723	t	c	-0.0587	0.0091	9.206e-11	-0.042	0.0888	C	T	-0.06117	0.009111	1.8948e-11		T	C	-0.15253	0.0840971	0.0697182
6:31052494:A:G	6	31052494	HCG22(dist=956)	upstream	rs9262602	a	g	0.0706	0.013	5.135e-08	0.9994	0.0065	A	G	-0.06995	0.013026	7.8677e-08		A	G	-0.150854	0.140173	0.28184
6:31112117:A:G	6	31112117	C6orf15	exonic	rs2233977	a	g	0.0605	0.0111	4.414e-08	0.9971	0.0233	A	G	-0.060619	0.011136	5.2253e-08		A	G	-0.0520898	0.0899129	0.562362
6:31306250:C:T	6	31306250	LINC02571(dist=4613),HLA-B(dist=47625)	intergenic	rs1634761	t	c	-0.0565	0.0083	7.866e-12	-0.0429	0.0701	C	T	-0.057607	0.0083243	4.5039e-12		T	C	-0.0181158	0.0698264	0.795295
6:31352732:G:A	6	31352732	LINC02571(dist=51095),HLA-B(dist=1143)	intergenic	rs9266089	a	g	-0.0564	0.0123	4.869e-06	0.0008	0.0082	G	A	-0.057485	0.012386	3.4658e-06		G	A	0.0676187	0.129522	0.601625
6:31382067:A:G	6	31382067	HLA-B(dist=24888),MICA-AS1(dist=12222)	intergenic	rs9295987	a	g	-0.0895	0.0146	1.005e-09	0.911	0.0158	A	G	0.09313	0.01485	3.5804e-10		A	G	-0.0424384	0.0893369	0.63476
6:31464348:C:T	6	31464348	HCP5	ncRNA_exonic	rs2284178	t	c	-0.0491	0.0083	3.341e-09	-0.0354	0.0579	C	T	-0.050196	0.0083555	1.884e-09		C	T	0.0306266	0.0702051	0.66266
6:31465913:T:G	6	31465913	HCP5(dist=104)	downstream	rs55886855	t	g	0.0737	0.0155	1.965e-06	0.9988	0.0096	T	G	-0.075803	0.015608	1.1948e-06		T	G	0.0686008	0.128564	0.593623
6:31470319:C:A	6	31470319	HCG26(dist=910)	upstream	rs2523668	a	c	-0.0643	0.0136	2.047e-06	0.0004	0.0042	C	A	-0.063899	0.0136	2.6192e-06		C	A	-0.125031	0.158386	0.429876
6:31502371:G:A	6	31502371	MICB	intronic	rs3095232	a	g	-0.0672	0.0107	3.395e-10	-0.0433	0.0894	G	A	-0.069332	0.010747	1.109e-10		A	G	-0.162891	0.110912	0.141927
6:31556227:GC:G	6	31556227	NFKBIL1	intronic	rs530924163	g	gc	-0.0664	0.0112	2.878e-09	-0.0416	0.1025	GC	G	-0.067923	0.011306	1.8842e-09		G	GC	0.000551209	0.0731812	0.99399
6:32427864:T:C	6	32427864	TSBP1-AS1(dist=20135),HLA-DRA(dist=12023)	intergenic	rs9268576	t	c	-0.0862	0.0149	7.922e-09	0.9201	0.0037	T	C	0.086658	0.015063	8.7724e-09		T	C	0.0580002	0.113971	0.61082
6:32612880:T:C	6	32612880	HLA-DRB1(dist=23044),HLA-DQA1(dist=24526)	intergenic	rs2395516	t	c	0.0515	0.0091	1.767e-08	1.0349	0.0534	T	C	-0.053379	0.0092082	6.7553e-09		T	C	0.0683006	0.0728097	0.348209
6:32692598:A:G	6	32692598	HLA-DQB1(dist=25941),HLA-DQA2(dist=48793)	intergenic	rs2858324	a	g	0.045	0.0091	7.92e-07	0.9913	0.0815	A	G	-0.044455	0.009166	1.2348e-06		G	A	0.0934937	0.0862719	0.278494
6:32707868:G:A	6	32707868	HLA-DQB1(dist=41211),HLA-DQA2(dist=33523)	intergenic	rs17219281	a	g	-0.1145	0.0176	7.557e-11	-0.0929	0.0077	G	A	-0.11557	0.017628	5.5258e-11		G	A	0.120949	0.258871	0.640345
6:33070114:C:T	6	33070114	HLA-DPA1	intronic	rs72879614	t	c	0.0483	0.0101	1.705e-06	0.0043	0.0335	C	T	0.048964	0.010172	1.4829e-06		C	T	0.00722391	0.0785376	0.926714
6:33090806:T:C	6	33090806	HLA-DPB1(dist=1110),HLA-DPB2(dist=21710)	intergenic	rs2068205	t	c	-0.0484	0.0089	4.56e-08	0.9512	0.0751	T	C	0.049693	0.0089022	2.3754e-08		C	T	0.0702746	0.0857565	0.41252
6:41520640:G:A	6	41520640	LINC01276(dist=788)	downstream	rs12660421	a	g	0.2396	0.0201	8.471e-33	0.2247	0.0074	G	A	0.24033	0.02066	2.8231e-31		G	A	0.226766	0.085833	0.00824307
6:41752344:A:T	6	41752344	PGC(dist=4943),FRS3(dist=17832)	intergenic	rs113820722	a	t	0.093	0.0169	3.439e-08	1.0794	0.014	A	T	-0.092775	0.016956	4.4661e-08		A	T	-0.115368	0.159187	0.468618
6:41946040:G:A	6	41946040	CCND3	intronic	rs4714520	a	g	-0.0426	0.0092	4.002e-06	0.0054	0.0427	G	A	-0.041576	0.0093033	7.8605e-06		G	A	-0.105798	0.0742931	0.154427
6:50972964:G:A	6	50972964	TFAP2B(dist=125345),PKHD1(dist=642335)	intergenic	rs62407804	a	g	0.0541	0.0112	1.411e-06	0.006	0.0425	G	A	0.052742	0.01133	3.2392e-06		G	A	0.123367	0.0804625	0.125222
7:100032719:C:T	7	100032719	ZKSCAN1	intronic	rs2897075	t	c	0.05	0.0086	5.52e-09	0.0462	0.0505	C	T	0.049692	0.0086419	8.9169e-09		C	T	0.0745934	0.0728555	0.305904
7:100249210:A:G	7	100249210	CASTOR3	ncRNA_intronic	rs10269574	a	g	-0.0561	0.0114	8.993e-07	0.998	0.0171	A	G	0.055237	0.011502	1.5669e-06		A	G	0.121305	0.0986504	0.218832
7:22855116:A:T	7	22855116	SNHG26	ncRNA_intronic	rs3757447	a	t	0.0495	0.0087	1.244e-08	1.0354	0.0839	A	T	-0.049293	0.008748	1.7535e-08		T	A	0.067624	0.0797451	0.396437
7:22880189:A:G	7	22880189	SNHG26(dist=18753),FAM126A(dist=54042)	intergenic	rs6950451	a	g	-0.045	0.0096	2.644e-06	0.9949	0.04	A	G	0.042222	0.0096514	1.2162e-05		A	G	0.216734	0.0762848	0.00449554
7:2698925:C:T	7	2698925	AMZ1	intronic	rs4719633	t	c	0.0621	0.0136	5.196e-06	0.0011	0.0097	C	T	0.063148	0.013707	4.0833e-06		C	T	-0.0260024	0.124811	0.834968
7:5489454:A:G	7	5489454	FBXL18(NM_001321213:c.*3530>0,NM_001363442:c.*9530>0)	UTR3	rs4724702	a	g	0.0673	0.0145	3.335e-06	0.9821	0.1221	A	G	-0.070096	0.01463	1.6565e-06		G	A	-0.0631145	0.0998566	0.527353
7:7027369:T:C	7	7027369	CCZ1B(dist=201094),MIR3683(dist=39595)	intergenic	rs34138876	t	c	-0.0914	0.0195	2.667e-06	0.9993	0.0058	T	C	0.09511	0.019603	1.2229e-06		T	C	-0.169899	0.164201	0.300808
7:75621312:AGAGCCG:A	7	75621312	HIP1	intronic	rs138089196	a	agagccg	0.0553	0.0112	7.547e-07	0.0027	0.0219	AGAGCCG	A	0.055719	0.011256	7.4089e-07		AGAGCCG	A	0.0251806	0.0917279	0.78369
8:134693976:A:G	8	134693976	ZFAT	intronic	rs10100533	a	g	0.0386	0.0084	4.679e-06	0.9946	0.0458	A	G	-0.038359	0.0085	6.3962e-06		A	G	-0.059183	0.071669	0.408928
8:22163617:G:A	8	22163617	SFTPC	intronic	rs8192330	a	g	-0.0964	0.0192	4.849e-07	0.0039	0.0218	G	A	-0.099952	0.019467	2.8305e-07		G	A	0.0143606	0.109482	0.895642
8:60519448:G:A	8	60519448	RAB2A	intronic	rs4403445	a	g	0.0524	0.0084	3.728e-10	0.0484	0.0445	G	A	0.05261	0.008423	4.2101e-10		G	A	0.0377732	0.071325	0.596395
8:62599165:A:C	8	62599165	NKAIN3	intronic	rs76497941	a	c	-0.1237	0.0269	4.4e-06	0.9998	0.0018	A	C	0.12381	0.027077	4.8174e-06		A	C	0.11507	0.274677	0.67527
9:106728026:G:A	9	106728026	LINC01505(dist=48226),ZNF462(dist=135140)	intergenic	rs962719	a	g	0.0418	0.0088	2.14e-06	0.0069	0.0573	G	A	0.040508	0.0088804	5.0794e-06		G	A	0.130463	0.0738685	0.0773694
9:128529861:C:G	9	128529861	MIR1268A	ncRNA_intronic	rs146902539	c	g	-0.1943	0.0357	5.225e-08	0.9999	0.0011	C	G	0.18879	0.03589	1.4396e-07		C	G	0.682059	0.33839	0.0438419
9:133251881:T:C	9	133251881	ABO(NM_020469:c.*37850>0)	UTR3	rs9411475	t	c	-0.0677	0.0141	1.465e-06	0.9994	0.0059	T	C	0.068383	0.014115	1.2686e-06		T	C	-0.0104078	0.147484	0.943741
9:133257521:T:TC	9	133257521	ABO	exonic	rs8176719	t	tc	-0.0979	0.0095	7.487e-25	0.9057	0.0158	T	TC	0.10027	0.0095694	1.094e-25		T	TC	-0.0929913	0.0859591	0.279338
9:133257761:T:C	9	133257761	ABO	intronic	rs8176715	t	c	-0.057	0.0085	2.639e-11	0.9411	0.0736	T	C	0.058662	0.008594	8.7362e-12		C	T	0.094186	0.0810652	0.245294
9:133872761:G:C	9	133872761	VAV2	intronic	rs73662320	c	g	0.1442	0.0307	2.58e-06	0.0003	0.0023	G	C	0.14566	0.030891	2.4156e-06		G	C	0.044093	0.253142	0.861722
9:15795835:G:T	9	15795835	CCDC171	intronic	rs79611697	t	g	0.103	0.0187	3.718e-08	0.0896	0.0055	G	T	0.10347	0.018776	3.5703e-08		G	T	0.0311183	0.234342	0.894359
9:16987695:G:C	9	16987695	BNC2(dist=117025),CNTLN(dist=147345)	intergenic	rs2020320	c	g	-0.044	0.0094	2.914e-06	0.0032	0.0281	G	C	-0.043982	0.0094686	3.4006e-06		G	C	-0.0459781	0.0844269	0.586035
9:17014808:G:A	9	17014808	BNC2(dist=144138),CNTLN(dist=120232)	intergenic	rs62560463	a	g	0.0509	0.0112	5.498e-06	0.001	0.0105	G	A	0.050345	0.011265	7.8601e-06		G	A	0.112983	0.11409	0.32203
9:21139010:A:T	9	21139010	IFNB1(dist=61068),IFNW1(dist=1622)	intergenic	rs10811479	a	t	-0.0623	0.0126	7.723e-07	0.9987	0.0118	A	T	0.061364	0.012688	1.322e-06		A	T	0.143986	0.116234	0.215434
9:21212604:C:A	9	21212604	IFNA10(dist=5461),IFNA16(dist=3769)	intergenic	rs12347089	a	c	0.075	0.0169	8.659e-06	0.0015	0.0109	C	A	0.072851	0.017005	1.8344e-05		C	A	0.193076	0.126902	0.128147
9:33420010:A:G	9	33420010	AQP7(dist=17328),AQP3(dist=21151)	intergenic	rs10758202	a	g	0.0445	0.0089	5.26e-07	0.9978	0.0218	A	G	-0.043915	0.0089213	8.5444e-07		A	G	-0.102007	0.0869165	0.240549
9:33425186:GTAAC:G	9	33425186	AQP7(dist=22504),AQP3(dist=15975)	intergenic	rs60840586	g	gtaac	0.0645	0.0109	3.753e-09	0.0568	0.0204	GTAAC	G	0.065743	0.011024	2.4674e-09		GTAAC	G	-0.0145574	0.0866467	0.866576
9:8262268:C:T	9	8262268	DMAC1(dist=462490),PTPRD(dist=51978)	intergenic	rs62533935	t	c	0.264	0.058	5.394e-06	0.0003	0.0018	C	T	0.2888	0.058929	9.5453e-07		C	T	-0.535547	0.334576	0.10945
23:15381161:A:G	23	15381161	NONE(dist=NONE),NONE(dist=NONE)	intergenic	NA	a	g	-0.0351	0.0065	6.298e-08	0.9936	0.0709	A	G	0.034535	0.0065136	1.145e-07		G	A	-0.103385	0.0718857	0.150383
23:15383291:C:T	23	15383291	NONE(dist=NONE),NONE(dist=NONE)	intergenic	rs6632521	t	c	0.0301	0.0065	3.663e-06	0.0018	0.0192	C	T	0.029764	0.0065267	5.1093e-06		C	T	0.0693319	0.0714852	0.332107
23:15497196:C:G	23	15497196	NONE(dist=NONE),NONE(dist=NONE)	intergenic	rs4830964	c	g	-0.0407	0.0062	3.711e-11	0.9515	0.0437	C	G	0.041115	0.0061842	2.9629e-11		C	G	0.00164631	0.0591048	0.977779
23:15529038:T:C	23	15529038	NONE(dist=NONE),NONE(dist=NONE)	intergenic	rs60768809	t	c	-0.1303	0.023	1.46e-08	0.8733	0.0133	T	C	0.12993	0.023318	2.5176e-08		T	C	0.144193	0.139549	0.301471
23:15627422:T:C	23	15627422	NONE(dist=NONE),NONE(dist=NONE)	intergenic	rs6653979	t	c	0.1482	0.0319	3.338e-06	0.9991	0.0049	T	C	-0.14637	0.032385	6.1885e-06		T	C	-0.202677	0.179142	0.257897
