# Supplementary material for: Novel risk loci for COVID-19 hospitalization among admixed American populations
Source: eLife. 2024 Oct 3;13:RP93666. doi: 10.7554/eLife.93666 (PMC11449485; doi:10.7554/eLife.93666)
Supplement: Supplementary file 12. — SC-HGI_ALL: meta-analysis SCOURGE-HGI_ALL; SC-HGI_AMR: meta-analysis SCOURGE-HGI_AMR; SC-HGI_3POP: meta-analysis SCOURGE-HGI_3POP. [file elife-93666-supp12.xlsx]

## Sheet: Supplementary Table 12.
Supplementary Table 12. Results of the 40 lead variants associated with COVID-19 hospitalization in the HGIv7 (hg38). SC-HGI_ALL: meta-analysis SCOURGE-HGI_ALL; SC-HGI_AMR: meta-analysis SCOURGE-HGI_AMR; SC-HGI_3POP: meta-analysis SCOURGE-HGI_3POP
		HGIB2_ALL					SC-HGI_ALL meta-analysis					SC-HGI_3POP meta-analysis					SC-HGI_AMR meta-analysis					SCOURGE_AMR GWAS
rsid	SNP	NEA	EA	beta	SE	pval	NEA	EA	beta	SE	pval	NEA	EA	beta	SE	pval	NEA	EA	beta	SE	pval	NEA	EA	beta	SE	pval
rs35154152	chr1:155202934:T:C	C	T	-0.13041	0.013532	5.5608e-22	t	c	0.131	0.0135	2.295e-22	t	c	0.1278	0.0139	3.267e-20	t	c	0.1263	0.0593	0.03326	T	C	-0.187511	0.134876	0.164453
rs10890422	chr1:46810098:T:C	C	T	-0.047171	0.0086191	4.4297e-08	t	c	0.0485	0.0086	1.512e-08	t	c	0.0486	0.0092	1.062e-07	t	c	0.0689	0.0321	0.03163	T	C	-0.140538	0.0731166	0.0545917
rs11208552	chr1:64947147:G:T	T	G	-0.054975	0.0091889	2.194e-09	t	g	-0.056	0.0091	8.079e-10	t	g	-0.0576	0.0098	3.671e-09	t	g	-0.0259	0.0325	0.4261	G	T	-0.124815	0.0743817	0.0933415
rs7515509	chr1:77483438:G:A	A	G	0.062296	0.0089243	2.9407e-12	a	g	0.0622	0.0089	2.206e-12	a	g	0.0625	0.0093	2.005e-11	a	g	0.0385	0.0328	0.2407	G	A	0.0573969	0.0761311	0.450896
rs7897438	chr10:112972548:C:A	A	C	-0.053738	0.009847	4.8342e-08	a	c	-0.0522	0.0098	9.212e-08	a	c	-0.0519	0.0106	9.167e-07	a	c	-0.0405	0.0348	0.2446	C	A	0.0468247	0.0788424	0.552577
rs3934643	chr10:79977061:G:A	A	G	0.077333	0.012223	2.5039e-10	a	g	0.0805	0.0121	2.841e-11	a	g	0.075	0.0137	4.694e-08	a	g	0.1078	0.0367	0.003303	G	A	0.238641	0.0859734	0.00550738
rs35705950	chr11:1219991:G:T	T	G	-0.10119	0.01454	3.4141e-12	t	g	-0.1024	0.0145	1.504e-12	t	g	-0.0975	0.015	7.947e-11	t	g	-0.0585	0.0651	0.369	G	T	-0.242627	0.155755	0.119292
rs7949972	chr11:34480495:C:T	T	C	-0.087013	0.008542	2.2804e-24	t	c	-0.087	0.0085	1.094e-24	t	c	-0.0876	0.0091	5.656e-22	t	c	-0.0526	0.0314	0.09382	C	T	-0.0857096	0.0710607	0.227761
rs10850094	chr12:112922758:T:C	C	T	0.074444	0.0091577	4.3253e-16	t	c	-0.0753	0.0091	1.461e-16	t	c	-0.073	0.0097	5.172e-14	t	c	-0.062	0.0413	0.1337	C	T	-0.171261	0.0967736	0.0767752
rs5023077	chr12:132565387:T:C	C	T	-0.066746	0.0084514	2.844e-15	t	c	0.0667	0.0084	2.169e-15	t	c	0.0663	0.0089	1.038e-13	t	c	0.0603	0.0356	0.09011	C	T	0.0603331	0.0821913	0.462914
rs12585036	chr13:112881427:C:T	T	C	0.097378	0.010296	3.1503e-21	t	c	0.0969	0.0102	3.05e-21	t	c	0.0947	0.011	5.586e-18	t	c	0.107	0.0407	0.008517	º	T	0.0514693	0.0974575	0.597416
rs117169628	chr16:89196249:G:A	A	G	0.098534	0.012798	1.3715e-14	a	g	0.1011	0.0127	1.874e-15	a	g	0.1036	0.0131	2.567e-15	a	g	0.1584	0.0525	0.002569	G	A	0.294962	0.111773	0.00831666
rs241044	chr17:45635098:G:A	A	G	-0.087001	0.010858	1.1236e-15	a	g	-0.0861	0.0108	1.631e-15	a	g	-0.0871	0.011	2.787e-15	a	g	-0.0404	0.0461	0.3808	G	A	0.00472646	0.10628	0.964528
rs3848456	chr17:49863260:C:A	A	C	0.19199	0.020254	2.5612e-21	a	c	0.1883	0.0198	2.297e-21	a	c	0.1861	0.0224	1.082e-16	a	c	0.1683	0.0444	0.0001506	C	A	0.10073	0.099371	0.310738
rs34536443	chr19:10352442:G:C	C	G	0.23431	0.024613	1.7383e-21	c	g	0.2326	0.0245	2.304e-21	c	g	0.2333	0.0248	4.918e-21	c	g	0.3164	0.1251	0.01141	G	C	0.0316541	0.266195	0.905344
rs71175234	chr19:45869791:ATT:A	A	ATT	0.062102	0.010883	1.156e-08	a	att	0.0621	0.0108	8.744e-09	a	att	0.0599	0.0113	1.122e-07	a	att	0.0725	0.0393	0.06546	ATT	A	0.0631897	0.0859736	0.462345
rs12610495	chr19:4717660:A:G	G	A	0.1499	0.0098675	4.0601e-52	a	g	-0.1507	0.0098	2.239e-53	a	g	-0.1473	0.0102	7.623e-47	a	g	-0.1594	0.0363	1.122e-05	A	G	0.201566	0.0812157	0.0130697
rs516316	chr19:48702888:G:C	C	G	-0.057447	0.0085683	2.0196e-11	c	g	-0.0561	0.0085	4.719e-11	c	g	-0.0502	0.0088	1.215e-08	c	g	-0.0634	0.0351	0.07082	G	C	0.0656014	0.0801333	0.412984
rs1405655	chr19:50379362:T:C	C	T	0.077686	0.0087352	5.9235e-19	t	c	-0.078	0.0087	2.439e-19	t	c	-0.0763	0.0091	6.538e-17	t	c	-0.1307	0.0313	2.997e-05	T	C	0.0958272	0.0710706	0.177549
rs1662979	chr2:26616850:G:T	T	G	0.049772	0.0087581	1.3233e-08	t	g	0.0503	0.0087	7.111e-09	t	g	0.0493	0.0092	8.083e-08	t	g	0.0706	0.0325	0.02993	G	T	0.0906731	0.0737558	0.218934
rs1123573	chr2:60480453:A:G	G	A	-0.071705	0.0093078	1.322e-14	a	g	0.0714	0.0093	1.216e-14	a	g	0.0687	0.0096	8.91e-13	a	g	0.0458	0.039	0.2398	A	G	-0.0443156	0.0863843	0.607947
rs9636867	chr21:33237639:A:G	G	A	0.13121	0.0087727	1.4086e-50	a	g	-0.1314	0.0087	1.892e-51	a	g	-0.1294	0.0093	1.456e-43	a	g	-0.1535	0.0314	9.794e-07	A	G	0.143888	0.0716713	0.0446844
rs78143111	chr21:33934844:G:A	A	G	0.13022	0.014024	1.6196e-20	a	g	0.132	0.0139	1.625e-21	a	g	0.1336	0.0156	1.077e-17	a	g	0.2134	0.0404	1.277e-07	G	A	0.209157	0.0911186	0.021708
rs11924013	chr3:101647854:G:A	A	G	-0.06008	0.0088715	1.2684e-11	a	g	-0.0596	0.0088	1.361e-11	a	g	-0.0671	0.0094	8.256e-13	a	g	-0.1062	0.0361	0.003309	G	A	-0.0228817	0.0778231	0.768741
rs73062389	chr3:45793925:G:A	A	G	0.16012	0.020947	2.1028e-14	a	g	0.1616	0.0208	7.036e-15	a	g	0.1634	0.0211	9.372e-15	a	g	0.1501	0.0871	0.08474	G	A	0.242431	0.155459	0.118889
rs17713054	chr3:45818159:G:A	A	G	0.48958	0.015541	8.3124e-218	a	g	0.4898	0.0155	2.12e-220	a	g	0.4884	0.0167	1.57e-187	a	g	0.5102	0.0622	2.394e-16	G	A	0.511072	0.148262	0.000566656
rs34712979	chr4:105897896:G:A	A	G	-0.06072	0.011036	3.7572e-08	a	g	-0.0622	0.011	1.479e-08	a	g	-0.0626	0.0112	2e-08	a	g	-0.0571	0.0577	0.322	G	A	-0.232568	0.117112	0.0470495
rs16877005	chr4:25312372:A:G	G	A	0.093562	0.015175	7.0159e-10	a	g	-0.0951	0.015	2.563e-10	a	g	-0.0959	0.0176	4.787e-08	a	g	-0.1281	0.0464	0.005737	A	G	0.183213	0.114193	0.108621
rs7671107	chr4:25447603:G:A	A	G	-0.071892	0.010204	1.844e-12	a	g	-0.0714	0.0101	1.636e-12	a	g	-0.0639	0.011	6.952e-09	a	g	-0.0375	0.0338	0.2677	A	G	0.0455006	0.0760529	0.549656
rs10066378	chr5:132441275:T:C	C	T	0.074001	0.011575	1.625e-10	t	c	-0.0744	0.0115	9.887e-11	t	c	-0.0809	0.0125	9.423e-11	t	c	-0.0693	0.0495	0.1613	T	C	0.110941	0.106241	0.296372
rs2517723	chr6:29947491:C:T	T	C	-0.06117	0.009111	1.8948e-11	t	c	-0.0587	0.0091	9.206e-11	t	c	-0.058	0.0096	1.343e-09	t	c	0.009	0.039	0.8182	T	C	-0.15253	0.0840971	0.0697182
rs1128175	chr6:31182658:A:G	G	A	-0.066846	0.010214	5.9666e-11	a	g	0.0657	0.0101	9.186e-11	a	g	0.0714	0.0108	3.174e-11	a	g	0.0501	0.0381	0.1888	G	A	-0.0119168	0.0841338	0.887363
rs35122968	chr6:32714422:T:C	C	T	-0.10631	0.017055	4.5603e-10	t	c	0.1055	0.017	5.614e-10	t	c	0.1062	0.0179	2.913e-09	t	c	-0.0971	0.1064	0.3613	T	C	0.0713419	0.255432	0.780015
rs12660421	chr6:41520640:G:A	A	G	0.24033	0.02066	2.8231e-31	a	g	0.2396	0.0201	8.471e-33	a	g	0.1874	0.0264	1.256e-12	a	g	0.1802	0.0458	8.508e-05	G	A	0.226766	0.085833	0.00824307
rs2897075	chr7:100032719:C:T	T	C	0.049692	0.0086419	8.9169e-09	t	c	0.05	0.0086	5.52e-09	t	c	0.0523	0.0092	1.349e-08	t	c	0.0047	0.0315	0.8817	C	T	0.0745934	0.0728555	0.305904
rs717624	chr7:22854868:T:C	C	T	-0.049354	0.0087621	1.7742e-08	t	c	0.0496	0.0087	1.275e-08	t	c	0.0506	0.0092	3.322e-08	t	c	0.0462	0.0349	0.186	C	T	0.0660574	0.0797501	0.407498
rs2875968	chr8:60513412:G:A	A	G	0.050369	0.0085951	4.6237e-09	a	g	0.0503	0.0085	3.784e-09	a	g	0.0525	0.0091	9.201e-09	a	g	0.0229	0.0313	0.4641	G	A	0.0451678	0.0718544	0.52961
rs505922	chr9:133273813:C:T	T	C	-0.087094	0.0085991	4.1403e-24	t	c	-0.0853	0.0086	2.123e-23	t	c	-0.0882	0.0091	4.237e-22	t	c	0.0157	0.0367	0.6688	T	C	-0.0988416	0.0869253	0.255502
rs79611697	chr9:15795835:G:T	T	G	0.10347	0.018776	3.5703e-08	t	g	0.103	0.0187	3.718e-08	t	g	0.1008	0.0193	1.914e-07	t	g	0.1763	0.0981	0.07228	G	T	0.0311183	0.234342	0.894359
rs202198158	chr9:33425186:GTAAC:G	G	GTAAC	0.065743	0.011024	2.4674e-09	g	gtaac	0.0645	0.0109	3.753e-09	g	gtaac	0.0645	0.0118	4.233e-08	g	gtaac	0.0422	0.0412	0.3059	GTAAC	G	-0.0145574	0.0866467	0.866576
