# Supplementary material for: Novel risk loci for COVID-19 hospitalization among admixed American populations
Source: eLife. 2024 Oct 3;13:RP93666. doi: 10.7554/eLife.93666 (PMC11449485; doi:10.7554/eLife.93666)
Supplement: Supplementary file 13. — EA: effect allele; NEA: non-effect allele; EAF_avg: average effect allele frequency; FreqSE: standard error of averaged effect allele frequency. [file elife-93666-supp13.xlsx]

## Sheet: Supplementary Table 13.
Supplementary Table 13. Independent variants with p-value<1e-05 in the SC-HGI_3POP GWAS meta-analysis (hg38). EA: effect allele; NEA: non-effect allele; EAF_avg: average effect allele frequency; FreqSE: standard error of averaged effect allele frequency.
						SC-HGI_ALL meta-analysis							HGIB2_AMR					HGIB2_AFR					HGIB2_EUR					SC_LAT
SNP	CHR	POS	GENE	type	rsid	EA	NEA	beta	SE	pval	EAF_avg	FreqSE	NEA	EA	beta	SE	pval	NEA	EA	beta	SE	pval	NEA	EA	beta	SE	pval	NEA	EA	beta	SE	pval	EAF
1:28620777:G:T	1	28620777	TAF12	intronic	rs2809817	t	g	0.0975	0.0202	1.303e-06	0.0502	0.0074	G	T	0.25162	0.10097	0.012701	G	T	0.15925	0.093727	0.089309	G	T	0.090043	0.021201	2.1664e-05	G	T	-0.122745	0.200824	0.541063	0.0303246
1:35602257:G:A	1	35602257	PSMB2(NM_002794:c.*10100>0,NM_001199780:c.*10100>0,NM_001199779:c.*10100>0)	UTR3	rs4845406	a	g	0.0595	0.0131	5.258e-06	0.2347	0.2199	G	A	0.091376	0.036263	0.011743	G	A	0.060861	0.035591	0.087267	G	A	0.049618	0.015574	0.0014427	G	A	0.143531	0.0736841	0.0514243	0.455011
1:39499302:C:G	1	39499302	BMP8A	intronic	rs115888432	c	g	0.0442	0.0099	7.816e-06	0.4305	0.0552	C	G	-0.044037	0.038151	0.24839	C	G	-0.04464	0.033837	0.18708	C	G	-0.044554	0.010852	4.0344e-05	G	C	0.025229	0.0709986	0.722331	0.420416
1:46810098:T:C	1	46810098	CYP4B1	intronic	rs79380792	t	c	0.0486	0.0092	1.062e-07	0.5957	0.0927	T	C	-0.051846	0.035674	0.14613	T	C	-0.074536	0.037211	0.045172	T	C	-0.044901	0.0098801	5.5037e-06	T	C	-0.140538	0.0731166	0.0545917	0.442198
1:47731898:T:C	1	47731898	FOXD2(dist=291207),TRABD2B(dist=28630)	intergenic	rs184585274	t	c	0.0744	0.0153	1.23e-06	0.8788	0.0154	T	C	-0.056218	0.053257	0.29115	T	C	-0.16068	0.070099	0.021891	T	C	-0.075536	0.016636	5.6134e-06	T	C	0.113405	0.110992	0.306904	0.111475
1:64947147:G:T	1	64947147	JAK1	intronic	rs34455078	t	g	-0.0576	0.0098	3.671e-09	0.6348	0.1308	G	T	-0.0025276	0.03612	0.94421	G	T	-0.078371	0.04034	0.052045	G	T	-0.059513	0.010581	1.8589e-08	G	T	-0.124815	0.0743817	0.0933415	0.392654
1:77483444:A:T	1	77483444	AK5	intronic	rs41264915	a	t	-0.0628	0.0093	1.57e-11	0.6261	0.0442	A	T	0.034558	0.036313	0.34126	A	T	0.013566	0.037486	0.71743	A	T	0.068613	0.010061	9.1078e-12	A	T	0.0573969	0.0761311	0.450896	0.320757
1:77984833:C:A	1	77984833	DNAJB4	intronic	rs60981924	a	c	0.0908	0.0152	2.116e-09	0.1146	0.0191	C	A	0.065252	0.089068	0.4638	C	A	0.13988	0.11331	0.217	C	A	0.092186	0.015597	3.4118e-09	C	A	-0.100218	0.176051	0.569182	0.041287
1:78329131:G:A	1	78329131	MGC27382	ncRNA_intronic	rs594028	a	g	-0.0543	0.0122	8.019e-06	0.1592	0.0354	G	A	-0.022719	0.045733	0.61935	G	A	-0.047618	0.034588	0.1686	G	A	-0.056587	0.013673	3.4957e-05	G	A	-0.128133	0.0953886	0.179185	0.158172
1:90724174:C:T	1	90724174	BARHL2(dist=6872),LINC02609(dist=58810)	intergenic	rs58237354	t	c	0.0428	0.0096	7.833e-06	0.419	0.0585	C	T	0.031579	0.034696	0.36274	C	T	-0.031821	0.053362	0.55096	C	T	0.046294	0.010241	6.1731e-06	C	T	0.0542941	0.0724609	0.453684	0.414294
1:92577196:G:A	1	92577196	EVI5	intronic	rs9661015	a	g	0.141	0.0269	1.555e-07	0.0278	0.0025	G	A	0.14154	0.10842	0.19172	G	A	-0.24103	0.2494	0.33383	G	A	0.14576	0.028087	2.1049e-07	G	A	0.146429	0.25656	0.568175	0.0206435
1:100541480:T:C	1	100541480	GPR88(NM_022049:c.*13590>0)	UTR3	rs7532924	t	c	-0.0558	0.012	3.614e-06	0.7902	0.0243	T	C	0.05765	0.054126	0.28682	T	C	0.027791	0.085276	0.74451	T	C	0.057224	0.012601	5.594e-06	T	C	0.00796954	0.0887756	0.928469	0.212557
1:155036134:A:G	1	155036134	DCST1	intronic	rs72663814	a	g	0.0432	0.0088	1.059e-06	0.4179	0.0567	A	G	-0.013573	0.0374	0.71667	A	G	0.001512	0.036847	0.96727	A	G	-0.046681	0.0094585	8.0017e-07	G	A	0.143027	0.0819495	0.0809309	0.267938
1:155039663:G:A	1	155039663	DCST1	intronic	rs12082263	a	g	-0.103	0.0225	4.792e-06	0.0444	0.0064	G	A	-0.00039411	0.12853	0.99755	G	A	-0.040124	0.17173	0.81526	G	A	-0.10456	0.023175	6.4251e-06	G	A	-0.445383	0.251365	0.0764183	0.0193622
1:155041232:G:A	1	155041232	DCST1	intronic	rs11206189	a	g	-0.0909	0.0178	3.216e-07	0.0803	0.0123	G	A	-0.21875	0.099982	0.02868	G	A	-0.11532	0.14784	0.43538	G	A	-0.083402	0.01827	4.9944e-06	G	A	-0.467186	0.211612	0.0272622	0.0280467
1:155090468:G:A	1	155090468	EFNA3(dist=2930),EFNA1(dist=37408)	intergenic	rs10890422	a	g	0.1781	0.0276	1.127e-10	0.0298	0.0117	G	A	0.19049	0.072615	0.0087071	G	A	-0.2271	0.23831	0.34061	G	A	0.18763	0.030492	7.5743e-10	G	A	-0.0153538	0.188293	0.935011	0.0360194
1:155114935:G:A	1	155114935	EFNA3(dist=27397),EFNA1(dist=12941)	intergenic	rs12567716	a	g	-0.0743	0.0142	1.552e-07	0.1182	0.0164	G	A	-0.15249	0.068113	0.025174	G	A	-0.022613	0.10032	0.82166	G	A	-0.071316	0.014703	1.2308e-06	G	A	-0.112726	0.141786	0.426588	0.0670558
1:155197995:A:G	1	155197995	THBS3	intronic	rs11208552	a	g	0.1278	0.0137	1.109e-20	0.8814	0.0531	A	G	-0.096317	0.065687	0.14257	A	G	-0.05359	0.03514	0.12725	A	G	-0.14296	0.015375	1.432e-20	A	G	-0.183074	0.134429	0.173243	0.0820046
1:155346338:C:A	1	155346338	ASH1L	intronic	rs7528932	a	c	-0.1918	0.0426	6.762e-06	0.1096	0.0457	C	A	0.0048531	0.18226	0.97876	C	A	-0.20081	0.046705	1.7112e-05	C	A	-0.077675	0.14392	0.58939	C	A	-0.713217	0.267407	0.00764961	0.0187927
1:156126626:T:G	1	156126626	LMNA	intronic	rs34517439	t	g	-0.083	0.0147	1.847e-08	0.8172	0.2085	T	G	-0.0095536	0.061453	0.87646	T	G	0.090166	0.031054	0.0036902	T	G	0.091257	0.017635	2.2839e-07	T	G	-0.0373155	0.112017	0.739041	0.119448
1:204811778:AG:A	1	204811778	LRRN2(dist=126040),NFASC(dist=16874)	intergenic	rs12024239	a	ag	0.0627	0.0137	4.629e-06	0.2195	0.1472	AG	A	0.15648	0.040573	0.00011495	AG	A	0.083098	0.032021	0.0094564	AG	A	0.043944	0.016724	0.0085982	AG	A	0.00782422	0.0751539	0.917083	0.40803
1:205280562:A:G	1	205280562	TMCC2(dist=7219),NUAK2(dist=21501)	intergenic	rs1008078	a	g	0.0433	0.0097	8.527e-06	0.3467	0.0252	A	G	-0.025531	0.035741	0.47502	A	G	-0.083267	0.036258	0.021647	A	G	-0.042911	0.01065	5.5926e-05	G	A	-0.0232625	0.0725323	0.748424	0.381549
1:228206228:C:A	1	228206228	OBSCN-AS1	ncRNA_exonic	rs115545251	a	c	0.0479	0.0089	7.115e-08	0.582	0.0485	C	A	0.070371	0.035048	0.044659	C	A	0.022754	0.03108	0.4641	C	A	0.049893	0.0097086	2.7617e-07	A	C	0.0218737	0.0724518	0.762723	0.424544
2:26619278:C:G	2	26619278	CIB4	intronic	rs61875109	c	g	-0.0502	0.0093	7.086e-08	0.4887	0.0706	C	G	0.06986	0.036105	0.053004	C	G	0.10394	0.032763	0.0015121	C	G	0.042741	0.010181	2.6907e-05	C	G	0.0861434	0.0735809	0.241708	0.381122
2:28888233:T:C	2	28888233	TRMT61B(dist=17924),WDR43(dist=6434)	intergenic	rs5783244	t	c	0.0469	0.0101	3.704e-06	0.7101	0.0736	T	C	-0.055945	0.036575	0.12611	T	C	-0.020041	0.031333	0.52242	T	C	-0.049833	0.011327	1.0844e-05	T	C	-0.0339986	0.0761026	0.655058	0.51082
2:57614906:C:T	2	57614906	CCDC85A(dist=1228732),VRK2(dist=292745)	intergenic	rs12768929	t	c	0.1948	0.0434	7.086e-06	0.0663	0.0373	C	T	0.15347	0.056109	0.0062358	C	T	-0.006925	0.24971	0.97788	C	T	0.29151	0.085462	0.00064721	C	T	0.246065	0.12812	0.0547849	0.0851367
2:60480453:A:G	2	60480453	BCL11A	intronic	rs118104785	a	g	0.0687	0.0096	8.91e-13	0.6325	0.0331	A	G	-0.046162	0.043641	0.29016	A	G	-0.082986	0.032115	0.0097649	A	G	-0.068848	0.010432	4.1276e-11	A	G	-0.0443156	0.0863843	0.607947	0.223804
2:88259506:T:C	2	88259506	THNSL2(dist=72869),FOXI3(dist=187281)	intergenic	rs12253422	t	c	0.0605	0.0128	2.437e-06	0.806	0.1643	T	C	-0.019613	0.051874	0.70537	T	C	-0.055897	0.030807	0.06961	T	C	-0.066303	0.014818	7.6614e-06	T	C	0.00971815	0.104441	0.925864	0.141088
2:115793358:T:G	2	115793358	DPP10	intronic	rs10826920	t	g	-0.062	0.0138	7.505e-06	0.8972	0.0087	T	G	0.082389	0.069155	0.23351	T	G	0.13458	0.05212	0.0098218	T	G	0.05437	0.01476	0.00022988	T	G	0.137534	0.137598	0.317535	0.0699032
2:136250665:C:T	2	136250665	CXCR4(dist=132516),THSD7B(dist=514880)	intergenic	rs138722592	t	c	-0.0455	0.0096	2.215e-06	0.5644	0.1253	C	T	-0.026571	0.043537	0.54166	C	T	-0.0048114	0.052443	0.9269	C	T	-0.047578	0.010096	2.4445e-06	C	T	-0.0798959	0.0899281	0.374303	0.199601
2:165156244:C:T	2	165156244	SCN3A	intronic	rs721917	t	c	-0.065	0.0144	6.708e-06	0.1392	0.0224	C	T	-0.16824	0.07376	0.022553	C	T	-0.12493	0.088549	0.15827	C	T	-0.058655	0.015013	9.3514e-05	C	T	-0.0900933	0.134612	0.503316	0.0736048
2:165473791:T:A	2	165473791	CSRNP3	intronic	rs77025477	a	t	-0.0473	0.0105	6.275e-06	0.247	0.0255	T	A	-0.034001	0.037881	0.36941	T	A	0.01331	0.041708	0.74964	T	A	-0.053877	0.011397	2.2761e-06	T	A	-0.00451415	0.079814	0.954897	0.271498
2:175712176:C:A	2	175712176	ATP5MC3(dist=530466),LNPK(dist=211706)	intergenic	rs2052692	a	c	0.048	0.0107	6.81e-06	0.251	0.0389	C	A	0.040994	0.037199	0.27046	C	A	0.072468	0.052086	0.16413	C	A	0.04955	0.011504	1.6542e-05	C	A	-0.0538752	0.079533	0.498156	0.330723
2:175735661:C:T	2	175735661	ATP5MC3(dist=553951),LNPK(dist=188221)	intergenic	rs650162	t	c	-0.0435	0.0095	4.381e-06	0.5936	0.0287	C	T	-0.070882	0.035921	0.048463	C	T	-0.03506	0.034134	0.30436	C	T	-0.040594	0.010354	8.8352e-05	T	C	0.116754	0.0744483	0.116821	0.371014
2:197408867:C:T	2	197408867	SF3B1	intronic	rs35705950	t	c	0.049	0.0096	2.974e-07	0.4075	0.0628	C	T	0.13127	0.039118	0.00079185	C	T	0.072587	0.056497	0.19887	C	T	0.041701	0.010113	3.7306e-05	C	T	0.107936	0.0745932	0.147899	0.354072
2:216446907:G:T	2	216446907	SMARCAL1	intronic	rs1001179	t	g	-0.0534	0.0118	5.942e-06	0.2832	0.1648	G	T	-0.11154	0.036746	0.0024019	G	T	-0.050429	0.034331	0.14186	G	T	-0.04613	0.013577	0.00067938	G	T	-0.0463157	0.0733941	0.528005	0.40447
3:45297145:A:G	3	45297145	TMEM158(dist=70858),LARS2(dist=91431)	intergenic	rs61882275	a	g	-0.0948	0.0201	2.563e-06	0.9275	0.0103	A	G	0.049645	0.12723	0.69639	A	G	-0.048151	0.19012	0.80006	A	G	0.099246	0.020614	1.4756e-06	A	G	-0.0904039	0.220077	0.681232	0.0264806
3:45373826:C:T	3	45373826	TMEM158(dist=147539),LARS2(dist=14750)	intergenic	rs4755375	t	c	-0.0498	0.0097	3.162e-07	0.3784	0.0566	C	T	-0.05057	0.036417	0.16494	C	T	0.037772	0.045657	0.40807	C	T	-0.054865	0.010476	1.6287e-07	C	T	-0.0260024	0.0737984	0.72458	0.340262
3:45708708:C:T	3	45708708	SACM1L	intronic	rs16930094	t	c	-0.1051	0.0136	1.369e-14	0.1333	0.0205	C	T	-0.0043091	0.064278	0.94655	C	T	-0.0051213	0.1023	0.96007	C	T	-0.10968	0.01417	9.9603e-15	C	T	-0.314843	0.138419	0.0229321	0.0677677
3:45729730:C:T	3	45729730	SACM1L	intronic	rs836143	t	c	-0.0525	0.0087	1.522e-09	0.5156	0.0328	C	T	0.01631	0.034916	0.6404	C	T	-0.029535	0.030475	0.33246	C	T	-0.058727	0.009464	5.4595e-10	C	T	-0.111404	0.0719532	0.121553	0.436503
3:45756734:C:T	3	45756734	SLC6A20(NM_020208:c.*22440>0,NM_022405:c.*22440>0,NM_001385683:c.*22440>0)	UTR3	rs10742995	t	c	0.3138	0.0227	1.266e-43	0.0445	0.0061	C	T	0.2047	0.1301	0.11563	C	T	-0.025226	0.18704	0.89272	C	T	0.32144	0.0233	2.7099e-43	C	T	0.428917	0.234167	0.0670009	0.0206435
3:45777388:G:C	3	45777388	SLC6A20	intronic	rs10849896	c	g	0.1413	0.015	3.506e-21	0.154	0.0522	G	C	0.040348	0.064021	0.52854	G	C	0.012242	0.037076	0.74126	G	C	0.18275	0.017251	3.1867e-26	G	C	-0.0079208	0.0843711	0.925204	0.223662
3:45795331:AT:A	3	45795331	SLC6A20	intronic	rs4767025	a	at	0.0869	0.0132	3.952e-11	0.5375	0.1017	AT	A	0.11423	0.06322	0.07078	AT	A	0.07104	0.053385	0.18329	AT	A	0.088891	0.014077	2.707e-10	A	AT	-0.00124015	0.086631	0.988578	0.213838
3:45796521:G:T	3	45796521	SLC6A20(NM_020208:c.-1020>0,NM_022405:c.-1020>0,NM_001385683:c.-1020>0)	UTR5	rs12231415	t	g	0.1466	0.0138	2.348e-26	0.1124	0.0138	G	T	0.13196	0.075715	0.081362	G	T	0.22232	0.087858	0.011393	G	T	0.14396	0.014313	8.4937e-24	G	T	0.225511	0.121109	0.0625956	0.0953872
3:45796808:G:A	3	45796808	SLC6A20(dist=272)	upstream	rs5023077	a	g	0.0748	0.0095	3.525e-15	0.5748	0.0347	G	A	0.059996	0.038233	0.11659	G	A	0.025817	0.032094	0.42116	G	A	0.081174	0.010394	5.7297e-15	A	G	-0.0662585	0.0783361	0.397651	0.303246
3:45830416:G:A	3	45830416	LZTFL1	intronic	rs138641451	a	g	0.4884	0.0167	1.13e-187	0.0745	0.0105	G	A	0.51086	0.068635	9.8355e-14	G	A	0.2234	0.12901	0.083338	G	A	0.49158	0.017513	2.3629e-173	G	A	0.509613	0.148355	0.000592374	0.0595103
3:45847464:T:G	3	45847464	LZTFL1	intronic	rs35233217	t	g	-0.0784	0.0097	6.901e-16	0.3831	0.0257	T	G	0.091091	0.046883	0.052024	T	G	0.029063	0.031821	0.36108	T	G	0.081654	0.010534	9.0786e-15	G	T	-0.172699	0.0829885	0.0374335	0.25242
3:45848095:G:T	3	45848095	LZTFL1	intronic	rs12585036	t	g	-0.1247	0.0276	6.302e-06	0.0249	0.0024	G	T	-0.056919	0.11958	0.63407	G	T	-0.0094284	0.21357	0.96479	G	T	-0.13276	0.02884	4.1601e-06	G	T	0.0175953	0.244278	0.942578	0.0224943
3:45863056:C:G	3	45863056	LZTFL1	intronic	rs36048052	c	g	0.0835	0.0135	7.081e-10	0.8147	0.0309	C	G	-0.14328	0.077733	0.06529	C	G	-0.11967	0.095043	0.208	C	G	-0.082698	0.013978	3.2924e-09	C	G	0.10067	0.138061	0.465896	0.0708998
3:45993299:T:C	3	45993299	FYCO1	intronic	rs7145240	t	c	-0.0827	0.0103	7.633e-16	0.296	0.1247	T	C	0.062338	0.050588	0.21785	T	C	0.048884	0.032879	0.13707	T	C	0.087807	0.011146	3.3326e-15	C	T	-0.0687382	0.0867334	0.428056	0.220103
3:46016929:A:T	3	46016929	XCR1(dist=80)	downstream	rs4903661	a	t	0.0887	0.0188	2.307e-06	0.9226	0.0127	A	T	-0.096643	0.0988	0.32799	A	T	0.23963	0.14383	0.095707	A	T	-0.087424	0.019385	6.4857e-06	A	T	-0.93583	0.213448	1.16333e-05	0.0276196
3:46027272:A:C	3	46027272	XCR1	intronic	rs117293456	a	c	-0.1192	0.0093	9.889e-38	0.6452	0.084	A	C	0.12054	0.037131	0.0011692	A	C	0.0241	0.031731	0.44755	A	C	0.12724	0.010152	4.9008e-36	A	C	0.211586	0.0761284	0.00544713	0.324032
3:46218953:G:A	3	46218953	CCR1(dist=10640),CCR3(dist=23428)	intergenic	rs60333545	a	g	0.1672	0.0138	1.305e-33	0.1605	0.1231	G	A	0.17585	0.056214	0.0017588	G	A	-0.011049	0.030654	0.71852	G	A	0.22092	0.016316	8.9942e-42	G	A	-0.00811493	0.108964	0.940633	0.126424
3:46230671:G:T	3	46230671	CCR1(dist=22358),CCR3(dist=11710)	intergenic	rs75968492	t	g	0.2327	0.0167	2.531e-44	0.0888	0.0193	G	T	0.061309	0.04908	0.21161	G	T	0.081814	0.13544	0.54582	G	T	0.26677	0.018136	5.5775e-49	G	T	-0.0303599	0.104171	0.770714	0.133685
3:46278971:T:C	3	46278971	CCR3(dist=12265),CCR2(dist=74773)	intergenic	rs12908340	t	c	0.0713	0.0132	6.416e-08	0.8234	0.0303	T	C	-0.073195	0.066958	0.27432	T	C	0.095878	0.092541	0.30018	T	C	-0.071353	0.01367	1.7931e-07	T	C	-0.390571	0.130228	0.00270743	0.0731777
3:46348208:G:A	3	46348208	CCR3(dist=81502),CCR2(dist=5536)	intergenic	rs67503271	a	g	0.1376	0.0243	1.583e-08	0.0402	0.006	G	A	0.32254	0.13323	0.015484	G	A	-0.04262	0.24695	0.86298	G	A	0.12825	0.025013	2.9373e-07	G	A	0.577882	0.243247	0.0175156	0.0193622
3:46355949:A:G	3	46355949	CCR2	intronic	rs73515468	a	g	-0.0778	0.0089	1.835e-18	0.5782	0.095	A	G	0.029538	0.034849	0.39667	A	G	-0.059051	0.035397	0.095264	A	G	0.091688	0.0095869	1.1342e-21	G	A	-0.0665487	0.0709707	0.348403	0.4375
3:46397734:A:T	3	46397734	CCR5AS	ncRNA_intronic	rs76564172	a	t	-0.0421	0.0089	2.217e-06	0.4319	0.0236	A	T	0.051934	0.034948	0.13726	A	T	0.021013	0.032564	0.51875	A	T	0.041829	0.0096667	1.5109e-05	T	A	-0.116266	0.0719676	0.106195	0.471384
3:46442226:T:G	3	46442226	LTF	intronic	rs2102497	t	g	-0.0801	0.0108	1.313e-13	0.7393	0.0185	T	G	0.11603	0.042606	0.0064639	T	G	-0.0051384	0.036023	0.88657	T	G	0.087673	0.011883	1.6094e-13	T	G	0.0258114	0.0839166	0.758399	0.231634
3:46484897:C:T	3	46484897	LTF	intronic	rs60952428	t	c	0.1349	0.0169	1.574e-15	0.0924	0.0162	C	T	0.21658	0.083695	0.0096596	C	T	0.14645	0.12697	0.24872	C	T	0.12891	0.017526	1.9047e-13	C	T	0.373212	0.182143	0.0404619	0.0395786
3:46524726:T:C	3	46524726	LRRC2	intronic	rs117657830	t	c	-0.0418	0.0087	1.529e-06	0.4364	0.0584	T	C	0.035473	0.03388	0.29509	T	C	0.03392	0.030916	0.27257	T	C	0.04316	0.0094772	5.2619e-06	C	T	-0.0325345	0.0712576	0.647976	0.440774
3:47766287:C:T	3	47766287	SMARCC1	intronic	rs117169628	t	c	-0.1393	0.0314	9.181e-06	0.1994	0.1035	C	T	-0.14522	0.10329	0.15974	C	T	-0.16305	0.036314	7.1181e-06	C	T	-0.10021	0.088533	0.25768	C	T	0.256402	0.170703	0.133088	0.0442768
3:48153360:CTAAT:C	3	48153360	MAP4(dist=64512),CDC25A(dist=3786)	intergenic	rs3114857	ctaat	c	-0.0479	0.0106	5.61e-06	0.3994	0.061	CTAAT	C	0.14174	0.039623	0.0003472	CTAAT	C	0.09042	0.033015	0.0061672	CTAAT	C	0.037351	0.011757	0.0014884	C	CTAAT	0.0701539	0.0728135	0.335309	0.383115
3:101778725:C:T	3	101778725	NXPE3(dist=486)	upstream	rs3111833	t	c	-0.0723	0.0096	3.761e-14	0.3409	0.0324	C	T	-0.13272	0.042379	0.0017375	C	T	-0.090869	0.035002	0.0094274	C	T	-0.067504	0.010296	5.5135e-11	C	T	-0.0487937	0.0797256	0.540524	0.254271
3:113201061:G:A	3	113201061	LINC02044(dist=33330),BOC(dist=10496)	intergenic	rs117985867	a	g	0.1243	0.0271	4.558e-06	0.0328	0.0048	G	A	0.11128	0.14332	0.43748	G	A	-0.0052219	0.2533	0.98355	G	A	0.12401	0.027889	8.7303e-06	G	A	0.429298	0.316806	0.175391	0.0145216
3:146520241:A:G	3	146520241	PLSCR1	intronic	rs12945855	a	g	-0.0864	0.0156	2.848e-08	0.9136	0.0394	A	G	0.064526	0.075403	0.39214	A	G	0.070162	0.039508	0.075751	A	G	0.092344	0.017492	1.2983e-07	A	G	-0.0296186	0.147381	0.840725	0.0625
3:169296542:A:G	3	169296542	MECOM	intronic	rs2290400	a	g	-0.0672	0.0145	3.751e-06	0.8804	0.0778	A	G	0.048977	0.058084	0.39911	A	G	0.014817	0.035646	0.67765	A	G	0.076909	0.016761	4.4624e-06	A	G	0.20128	0.105037	0.0553296	0.123434
3:169361405:T:C	3	169361405	MECOM	intronic	rs3213762	t	c	-0.0471	0.0088	8.361e-08	0.4754	0.0477	T	C	0.066344	0.046217	0.15114	T	C	0.070082	0.031063	0.024066	T	C	0.042496	0.0094087	6.2834e-06	C	T	-0.180419	0.0832978	0.0303146	0.283884
3:188863636:C:A	3	188863636	LPP	intronic	rs1230082	a	c	0.058	0.0124	3.179e-06	0.2021	0.0713	C	A	-0.039202	0.046222	0.39637	C	A	0.10542	0.039329	0.0073499	C	A	0.063277	0.013912	5.4071e-06	C	A	-0.0145208	0.0763205	0.849105	0.462272
4:12093153:C:T	4	12093153	MIR12113(dist=309905),LINC02270(dist=130298)	intergenic	rs63750417	t	c	0.1184	0.0262	6.204e-06	0.0295	0.0156	C	T	0.12513	0.11033	0.25676	C	T	0.093122	0.062331	0.13518	C	T	0.12321	0.030234	4.5956e-05	C	T	0.152233	0.211619	0.471911	0.0287585
4:25309802:C:T	4	25309802	PI4K2B(dist=30598),ZCCHC4(dist=2972)	intergenic	rs12051901	t	c	-0.0549	0.0105	1.487e-07	0.7818	0.0175	C	T	-0.083426	0.039181	0.033234	C	T	-0.013259	0.036812	0.71872	C	T	-0.056337	0.01147	9.0364e-07	T	C	0.0651969	0.0802232	0.416394	0.264949
4:25312372:A:G	4	25312372	ZCCHC4(dist=402)	upstream	rs4792827	a	g	-0.0959	0.0176	4.787e-08	0.9225	0.0269	A	G	0.11719	0.050732	0.020894	A	G	0.058523	0.048134	0.22405	A	G	0.096337	0.020644	3.0617e-06	A	G	0.183213	0.114193	0.108621	0.11119
4:25416709:T:G	4	25416709	ANAPC4	intronic	rs10432043	t	g	0.0591	0.0099	2.455e-09	0.3537	0.1158	T	G	-0.11215	0.034973	0.0013426	T	G	-0.048958	0.034365	0.15426	T	G	-0.056094	0.010965	3.1251e-07	G	T	0.0103264	0.0713806	0.884974	0.470672
4:25428154:C:T	4	25428154	ANAPC4(dist=9656),LOC101929161(dist=102886)	intergenic	rs11654648	t	c	0.1109	0.0199	2.482e-08	0.0496	0.0068	C	T	0.090632	0.069958	0.19514	C	T	0.10253	0.061598	0.096012	C	T	0.1147	0.022329	2.7955e-07	C	T	0.087102	0.137602	0.526735	0.0673405
4:25483013:T:C	4	25483013	ANAPC4(dist=64515),LOC101929161(dist=48027)	intergenic	rs3848456	t	c	0.062	0.0132	2.684e-06	0.7345	0.0343	T	C	-0.13803	0.043658	0.0015685	T	C	-0.039681	0.047087	0.39939	T	C	-0.056073	0.014758	0.00014505	T	C	-0.0462542	0.0785513	0.555968	0.271071
4:53730729:A:G	4	53730729	LOC100506444	ncRNA_intronic	rs12602210	a	g	0.04	0.0088	6.165e-06	0.4693	0.0691	A	G	-0.086447	0.034517	0.012263	A	G	0.0028782	0.047882	0.95207	A	G	-0.038581	0.0093949	4.0157e-05	G	A	0.015688	0.0709687	0.825049	0.420131
4:102267552:C:T	4	102267552	SLC39A8	exonic	rs4790905	t	c	0.0889	0.0171	2.1e-07	0.0582	0.0064	C	T	0.058458	0.08366	0.4847	C	T	-0.053536	0.13412	0.68977	C	T	0.093611	0.017749	1.3334e-07	C	T	0.0136297	0.167916	0.935307	0.0419989
4:105669137:T:G	4	105669137	ARHGEF38	intronic	rs4800403	t	g	-0.0918	0.018	3.606e-07	0.9471	0.0041	T	G	-0.030989	0.085452	0.71687	T	G	0.17092	0.084493	0.043083	T	G	0.096238	0.019031	4.2632e-07	T	G	-0.0957106	0.169466	0.572225	0.0455581
4:105897896:G:A	4	105897896	NPNT	intronic	rs710845	a	g	-0.0626	0.0112	2e-08	0.2408	0.0382	G	A	-0.00091771	0.066305	0.98896	G	A	0.0088176	0.079728	0.91194	G	A	-0.064307	0.011488	2.172e-08	G	A	-0.232568	0.117112	0.0470495	0.101936
4:106867781:A:AT	4	106867781	LINC02173(dist=414334),DKK2(dist=54021)	intergenic	rs73510898	a	at	-0.1713	0.0366	2.895e-06	0.9832	0.0033	A	AT	0.13634	0.16735	0.41525	A	AT	0.13018	0.10034	0.19452	A	AT	0.18538	0.040793	5.511e-06	A	AT	-0.142627	0.316109	0.651848	0.0128132
4:107808529:C:T	4	107808529	PAPSS1(dist=88295),SGMS2(dist=16034)	intergenic	rs2304237	t	c	0.1302	0.0245	1.039e-07	0.0498	0.0079	C	T	0.18213	0.1757	0.29993	C	T	0.21756	0.2043	0.28692	C	T	0.12948	0.024986	2.1939e-07	C	T	-0.110597	0.305238	0.717104	0.0123861
5:732767:C:T	5	732767	ZDHHC11B	intronic	rs34536443	t	c	-0.0698	0.0149	2.839e-06	0.1881	0.0305	C	T	-0.002092	0.095526	0.98253	C	T	-0.17254	0.10183	0.090184	C	T	-0.070273	0.015377	4.8773e-06	C	T	-0.00161604	0.121901	0.989423	0.0894077
5:28043097:C:G	5	28043097	PURPL(dist=546696),LINC02103(dist=243292)	intergenic	rs2304256	c	g	-0.0446	0.0093	1.565e-06	0.6859	0.0316	C	G	0.0058596	0.035576	0.86917	C	G	0.071926	0.037021	0.052034	C	G	0.046259	0.010044	4.1157e-06	C	G	0.0109166	0.0732806	0.881578	0.377278
5:35678153:T:C	5	35678153	SPEF2	intronic	rs76186695	t	c	-0.0862	0.0194	9.017e-06	0.9457	0.0077	T	C	0.055869	0.097763	0.56768	T	C	0.08141	0.091139	0.37173	T	C	0.086533	0.020401	2.22e-05	T	C	0.220125	0.209908	0.294328	0.0313212
5:63256890:A:C	5	63256890	IPO11(dist=628301),HTR1A(dist=700986)	intergenic	rs66578645	a	c	0.0555	0.0124	7.648e-06	0.8532	0.0302	A	C	-0.028952	0.059636	0.62734	A	C	-0.089715	0.036624	0.014302	A	C	-0.052075	0.013619	0.00013154	A	C	-0.0626986	0.113491	0.580639	0.109339
5:94806175:T:G	5	94806175	MCTP1	intronic	rs565841517	t	g	-0.107	0.0242	9.78e-06	0.9642	0.0047	T	G	0.11398	0.13366	0.39378	T	G	0.26438	0.095369	0.0055692	T	G	0.099456	0.025655	0.00010589	T	G	-0.181755	0.216474	0.401125	0.0237756
5:132073149:A:C	5	132073149	CSF2(dist=640)	upstream	rs66833742	a	c	0.0426	0.009	1.947e-06	0.6221	0.0402	A	C	-0.012442	0.040371	0.75793	A	C	-0.025166	0.029997	0.40149	A	C	-0.044631	0.0097225	4.423e-06	A	C	-0.14556	0.0785794	0.0639693	0.28246
5:132075767:T:C	5	132075767	CSF2	exonic	NA	t	c	-0.0646	0.0105	7.847e-10	0.7651	0.0269	T	C	0.038459	0.039407	0.32909	T	C	0.062956	0.031828	0.047923	T	C	0.066045	0.011718	1.74e-08	T	C	0.120224	0.0836362	0.150585	0.249288
5:132383357:CTGAT:C	5	132383357	SLC22A5	intronic	rs11880374	ctgat	c	-0.0795	0.0179	8.633e-06	0.9267	0.0062	CTGAT	C	0.14246	0.091651	0.12009	CTGAT	C	0.0096959	0.059774	0.87114	CTGAT	C	0.085338	0.019262	9.412e-06	CTGAT	C	-0.0200591	0.164633	0.903025	0.0484055
5:132440814:A:G	5	132440814	IRF1-AS1	ncRNA_intronic	rs75895857	a	g	-0.0601	0.0092	6.387e-11	0.6528	0.0758	A	G	0.079261	0.037376	0.033949	A	G	0.047489	0.030997	0.12551	A	G	0.058194	0.010052	7.0657e-09	A	G	0.165668	0.0762718	0.0298499	0.329157
5:156245985:C:G	5	156245985	KIF4B(dist=1227851),SGCD(dist=81179)	intergenic	rs10406145	c	g	-0.0445	0.0097	4.227e-06	0.7009	0.0282	C	G	0.068239	0.036714	0.063079	C	G	0.055924	0.038892	0.15045	C	G	0.038528	0.01048	0.00023666	C	G	0.234061	0.0799321	0.00340874	0.289294
5:161483653:T:C	5	161483653	GABRB2	intronic	rs12610495	t	c	-0.1174	0.0234	5.171e-07	0.1574	0.137	T	C	0.25228	0.10418	0.015455	T	C	0.096531	0.034704	0.0054094	T	C	0.11565	0.034006	0.00067191	C	T	-0.275503	0.156731	0.07878	0.055951
6:10753642:T:C	6	10753642	TMEM14B	intronic	rs138567877	t	c	-0.1193	0.026	4.402e-06	0.6425	0.2451	T	C	0.1492	0.075908	0.049355	T	C	0.089887	0.032588	0.0058099	T	C	0.17724	0.057065	0.0018962	T	C	0.197227	0.129287	0.127135	0.0888383
6:22733184:G:T	6	22733184	LOC105374972(dist=15260),NRSN1(dist=1393031)	intergenic	rs35106244	t	g	-0.0527	0.0116	5.2e-06	0.1958	0.0242	G	T	-0.022023	0.049305	0.65512	G	T	-0.1113	0.053113	0.036131	G	T	-0.05045	0.012283	4.0004e-05	G	T	-0.122416	0.103824	0.238371	0.136959
6:26022164:C:T	6	26022164	H4C1(dist=114)	downstream	rs638294	t	c	-0.0796	0.0169	2.343e-06	0.1016	0.0165	C	T	-0.08056	0.089747	0.36938	C	T	-0.30945	0.14892	0.037712	C	T	-0.077286	0.017353	8.4399e-06	C	T	0.0282373	0.200737	0.888132	0.0318907
6:29947491:C:T	6	29947491	HLA-A(dist=1607),HCG9(dist=27624)	intergenic	rs10414323	t	c	-0.058	0.0096	1.343e-09	0.6256	0.0411	C	T	-0.030476	0.044085	0.48937	C	T	-0.06482	0.031627	0.040409	C	T	-0.062011	0.010388	2.3808e-09	T	C	-0.15253	0.0840971	0.0697182	0.221953
6:31109869:C:T	6	31109869	HCG22(dist=49991),C6orf15(dist=1354)	intergenic	rs11669872	t	c	-0.0617	0.0118	1.776e-07	0.1611	0.0155	C	T	-0.10581	0.046174	0.021939	C	T	-0.032484	0.051311	0.52668	C	T	-0.060402	0.012712	2.0169e-06	C	T	-0.0491584	0.0896597	0.583501	0.1875
6:31200620:G:A	6	31200620	HCG27	ncRNA_intronic	rs62156328	a	g	-0.053	0.0116	4.541e-06	0.1692	0.0116	G	A	0.008339	0.053292	0.87566	G	A	-0.047801	0.037913	0.20739	G	A	-0.057151	0.01255	5.2626e-06	G	A	-0.0407288	0.110854	0.713314	0.118024
6:31224989:C:T	6	31224989	HCG27(dist=21021),HLA-C(dist=43760)	intergenic	rs13018756	t	c	-0.0574	0.0111	2.042e-07	0.1858	0.0141	C	T	-0.065472	0.048519	0.17721	C	T	-0.075441	0.044921	0.093075	C	T	-0.056329	0.011806	1.8319e-06	C	T	-0.00868385	0.103166	0.932919	0.143935
6:31306250:C:T	6	31306250	LINC02571(dist=4613),HLA-B(dist=47625)	intergenic	rs79762515	t	c	-0.0579	0.0087	2.96e-11	0.4974	0.0138	C	T	-0.089369	0.036357	0.013968	C	T	0.045348	0.029759	0.12756	C	T	-0.067678	0.0094951	1.0208e-12	T	C	-0.0181158	0.0698264	0.795295	0.454584
6:31368625:G:A	6	31368625	HLA-B(dist=11446),MICA-AS1(dist=25664)	intergenic	rs16850739	a	g	-0.0926	0.0169	4.421e-08	0.0854	0.0136	G	A	0.013647	0.098725	0.89006	G	A	-0.042482	0.13453	0.75217	G	A	-0.095459	0.017366	3.8659e-08	G	A	-0.363464	0.249364	0.144961	0.0216401
6:31382067:A:G	6	31382067	HLA-B(dist=24888),MICA-AS1(dist=12222)	intergenic	rs10469710	a	g	-0.1008	0.0158	1.62e-10	0.9133	0.0263	A	G	0.12324	0.050769	0.015203	A	G	0.093577	0.05916	0.1137	A	G	0.10428	0.017607	3.1696e-09	A	G	-0.0424384	0.0893369	0.63476	0.184226
6:31464348:C:T	6	31464348	HCP5	ncRNA_exonic	rs13430212	t	c	-0.0537	0.0087	7.198e-10	0.4479	0.0265	C	T	-0.11866	0.034919	0.00067863	C	T	0.017854	0.030351	0.55636	C	T	-0.057451	0.0095094	1.5264e-09	C	T	0.0306266	0.0702051	0.66266	0.45074
6:31502371:G:A	6	31502371	MICB	intronic	rs12151726	a	g	-0.0688	0.011	4.478e-10	0.7665	0.0306	G	A	-0.1167	0.049862	0.019256	G	A	-0.1144	0.039553	0.003825	G	A	-0.064605	0.011868	5.2256e-08	A	G	-0.162891	0.110912	0.141927	0.120871
6:31556227:GC:G	6	31556227	NFKBIL1	intronic	rs284550	g	gc	-0.0692	0.0118	4.4e-09	0.671	0.0285	GC	G	-0.063849	0.052494	0.22386	GC	G	-0.15025	0.05396	0.0053612	GC	G	-0.067159	0.012607	9.986e-08	G	GC	0.000551209	0.0731812	0.99399	0.378274
6:32137224:G:T	6	32137224	FKBPL(dist=6936),PRRT1(dist=11135)	intergenic	rs732990	t	g	-0.044	0.0099	9.783e-06	0.2932	0.0359	G	T	-0.059016	0.038119	0.12157	G	T	0.064985	0.06742	0.33511	G	T	-0.048294	0.010532	4.5328e-06	G	T	0.0964193	0.0747585	0.19714	0.315632
6:32427864:T:C	6	32427864	TSBP1-AS1(dist=20135),HLA-DRA(dist=12023)	intergenic	rs12613887	t	c	-0.0963	0.0164	4.267e-09	0.9442	0.0259	T	C	0.10131	0.057248	0.076788	T	C	0.13326	0.046645	0.0042774	T	C	0.090912	0.018644	1.0814e-06	T	C	0.0580002	0.113971	0.61082	0.107773
6:32615580:A:T	6	32615580	HLA-DRB1(dist=25744),HLA-DQA1(dist=21826)	intergenic	rs17039663	a	t	0.062	0.0122	3.982e-07	0.8274	0.0239	A	T	-0.052913	0.043314	0.22185	A	T	-0.068665	0.053147	0.19636	A	T	-0.063354	0.013291	1.8731e-06	A	T	-0.0243744	0.0866015	0.778362	0.213126
6:32692598:A:G	6	32692598	HLA-DQB1(dist=25941),HLA-DQA2(dist=48793)	intergenic	rs1123573	a	g	0.0516	0.0097	8.934e-08	0.3909	0.0419	A	G	-0.065289	0.043354	0.13208	A	G	-0.041213	0.030668	0.179	A	G	-0.051404	0.010538	1.0714e-06	G	A	0.0934937	0.0862719	0.278494	0.224374
6:32707868:G:A	6	32707868	HLA-DQB1(dist=41211),HLA-DQA2(dist=33523)	intergenic	rs7605877	a	g	-0.1139	0.0179	2.096e-10	0.077	0.0123	G	A	0.15614	0.11952	0.19142	G	A	0.041296	0.12987	0.75051	G	A	-0.12453	0.018353	1.1567e-11	G	A	0.120949	0.258871	0.640345	0.0195046
6:33070114:C:T	6	33070114	HLA-DPA1	intronic	rs1884826	t	c	0.0488	0.0109	7.745e-06	0.189	0.0665	C	T	0.03719	0.043445	0.39198	C	T	0.037655	0.030944	0.22365	C	T	0.052483	0.012252	1.837e-05	C	T	0.00722391	0.0785376	0.926714	0.262956
6:33090806:T:C	6	33090806	HLA-DPB1(dist=1110),HLA-DPB2(dist=21710)	intergenic	rs139383547	t	c	-0.0469	0.0092	3.623e-07	0.3867	0.0636	T	C	0.032862	0.039975	0.41104	T	C	0.029973	0.050069	0.54942	T	C	0.049815	0.0096999	2.8125e-07	C	T	0.0702746	0.0857565	0.41252	0.227363
6:41522644:G:C	6	41522644	LINC01276(dist=2792),FOXP4-AS1(dist=1251)	intergenic	rs6141987	c	g	0.1968	0.0252	5.139e-15	0.0954	0.0829	G	C	0.16312	0.054192	0.002612	G	C	0.18401	0.05801	0.0015133	G	C	0.21307	0.035222	1.4538e-09	G	C	0.212716	0.0856169	0.0129729	0.255837
6:41752344:A:T	6	41752344	PGC(dist=4943),FRS3(dist=17832)	intergenic	rs4456761	a	t	0.0898	0.0172	1.662e-07	0.9056	0.0137	A	T	-0.19977	0.084222	0.017691	A	T	-0.23143	0.13424	0.084699	A	T	-0.082077	0.017784	3.9279e-06	A	T	-0.115368	0.159187	0.468618	0.0522494
6:50953889:A:T	6	50953889	TFAP2B(dist=106270),PKHD1(dist=661410)	intergenic	rs10485828	a	t	-0.0533	0.0113	2.531e-06	0.7933	0.0465	A	T	0.14315	0.037108	0.00011444	A	T	0.099253	0.050757	0.050529	A	T	0.038366	0.012372	0.0019287	A	T	0.141924	0.0791712	0.0730337	0.316629
6:108949348:G:A	6	108949348	ARMC2	intronic	rs237695	a	g	-0.0496	0.01	7.974e-07	0.2802	0.1069	G	A	-0.052758	0.035808	0.14066	G	A	-0.060262	0.031682	0.057157	G	A	-0.048206	0.011214	1.7181e-05	G	A	-0.0373536	0.0731521	0.609611	0.360621
7:5509020:C:T	7	5509020	FBXL18	intronic	rs2876034	t	c	0.0651	0.0147	9.695e-06	0.1026	0.0118	C	T	0.039237	0.049763	0.43041	C	T	0.018073	0.05618	0.74769	C	T	0.074616	0.016214	4.1879e-06	C	T	-0.0512151	0.103542	0.620859	0.140803
7:7027369:T:C	7	7027369	CCZ1B(dist=201094),MIR3683(dist=39595)	intergenic	rs2834139	t	c	-0.0978	0.0197	7.301e-07	0.9365	0.0088	T	C	0.0054386	0.10889	0.96017	T	C	0.38253	0.13104	0.0035094	T	C	0.098238	0.020467	1.5874e-06	T	C	-0.169899	0.164201	0.300808	0.0492597
7:22855116:A:T	7	22855116	SNHG26	ncRNA_intronic	rs112268545	a	t	0.0517	0.0092	1.653e-08	0.4113	0.0479	A	T	-0.043436	0.038839	0.26341	A	T	-0.10787	0.039231	0.0059682	A	T	-0.048493	0.0097817	7.1387e-07	T	A	0.067624	0.0797451	0.396437	0.270501
7:75621312:AGAGCCG:A	7	75621312	HIP1	intronic	rs9636867	a	agagccg	0.0532	0.0118	6.268e-06	0.2505	0.039	AGAGCCG	A	-0.0019759	0.050656	0.96889	AGAGCCG	A	0.11412	0.059155	0.053712	AGAGCCG	A	0.054405	0.012496	1.3381e-05	AGAGCCG	A	0.0251806	0.0917279	0.78369	0.181521
7:100032719:C:T	7	100032719	ZKSCAN1	intronic	rs9978157	t	c	0.0523	0.0092	1.349e-08	0.3681	0.0509	C	T	-0.011436	0.034998	0.74384	C	T	0.019486	0.044907	0.66435	C	T	0.058531	0.009857	2.8842e-09	C	T	0.0745934	0.0728555	0.305904	0.472096
7:100282394:G:A	7	100282394	CASTOR3(dist=10162),SPDYE3(dist=25308)	intergenic	rs7277142	a	g	0.0588	0.0128	4.743e-06	0.2119	0.0281	G	A	-0.040869	0.055428	0.46092	G	A	0.080328	0.036794	0.029024	G	A	0.061911	0.014284	1.4614e-05	G	A	0.0699521	0.101204	0.489441	0.141088
8:22163617:G:A	8	22163617	SFTPC	intronic	rs2834168	a	g	-0.1035	0.0195	1.076e-07	0.0841	0.012	G	A	-0.066548	0.063236	0.29263	G	A	-0.051721	0.15302	0.73536	G	A	-0.11296	0.021045	7.9818e-08	G	A	0.0143606	0.109482	0.895642	0.126281
8:60519448:G:A	8	60519448	RAB2A	intronic	rs9305531	a	g	0.0539	0.0089	1.654e-09	0.3971	0.0717	G	A	0.010376	0.034974	0.76672	G	A	0.11259	0.032229	0.00047696	G	A	0.05221	0.0097427	8.3746e-08	G	A	0.0377732	0.071325	0.596395	0.424972
8:62599165:A:C	8	62599165	NKAIN3	intronic	rs78143111	a	c	-0.1235	0.0271	5.195e-06	0.978	0.0023	A	C	0.033464	0.13969	0.81067	A	C	0.4749	0.20916	0.023175	A	C	0.12089	0.028013	1.5938e-05	A	C	0.11507	0.274677	0.67527	0.0187927
8:115706211:A:G	8	115706211	TRPS1(dist=37236),LINC00536(dist=244300)	intergenic	rs57398791	a	g	-0.0462	0.0104	8.608e-06	0.2819	0.0697	A	G	0.055715	0.039088	0.15405	A	G	0.071032	0.032862	0.030654	A	G	0.044024	0.011519	0.00013243	G	A	0.0314283	0.0771381	0.683693	0.297978
9:4090290:T:C	9	4090290	GLIS3	intronic	rs7280357	t	c	-0.0424	0.0095	8.85e-06	0.6131	0.0213	T	C	0.092434	0.035351	0.0089286	T	C	0.032601	0.032496	0.31575	T	C	0.03593	0.010516	0.00063418	T	C	0.189979	0.0728019	0.00906648	0.422978
9:15823920:A:G	9	15823920	CCDC171	intronic	rs915823	a	g	-0.0898	0.0172	1.745e-07	0.9089	0.0142	A	G	0.15153	0.093091	0.10358	A	G	-0.11266	0.1355	0.40572	A	G	0.092284	0.0177	1.8513e-07	A	G	-0.079639	0.204276	0.69664	0.0300399
9:21139010:A:T	9	21139010	IFNB1(dist=61068),IFNW1(dist=1622)	intergenic	rs383510	a	t	-0.0663	0.0129	2.763e-07	0.8485	0.0101	A	T	0.091703	0.058314	0.11582	A	T	0.1525	0.042128	0.0002947	A	T	0.054147	0.014042	0.00011523	A	T	0.143986	0.116234	0.215434	0.109197
9:21208230:A:G	9	21208230	IFNA10(dist=1087),IFNA16(dist=8143)	intergenic	rs132307	a	g	-0.123	0.0278	9.664e-06	0.9632	0.0056	A	G	0.20076	0.17816	0.25978	A	G	0.073403	0.2463	0.76569	A	G	0.12056	0.028432	2.2307e-05	A	G	0.287735	0.34178	0.39986	0.0113895
9:21324555:T:C	9	21324555	IFNA5(dist=19242),KLHL9(dist=5110)	intergenic	rs78812795	t	c	0.051	0.0111	4.538e-06	0.7252	0.0312	T	C	-0.024751	0.042364	0.55906	T	C	-0.092379	0.079586	0.24574	T	C	-0.050628	0.011772	1.702e-05	T	C	-0.130586	0.0847151	0.123203	0.223377
9:33420010:A:G	9	33420010	AQP7(dist=17328),AQP3(dist=21151)	intergenic	rs1460097	a	g	0.0452	0.0095	1.883e-06	0.6909	0.0218	A	G	-0.024511	0.042232	0.56165	A	G	-0.011046	0.031726	0.7277	A	G	-0.049174	0.010287	1.7531e-06	A	G	-0.102007	0.0869165	0.240549	0.214408
9:33425186:GTAAC:G	9	33425186	AQP7(dist=22504),AQP3(dist=15975)	intergenic	rs113557555	g	gtaac	0.0645	0.0118	4.233e-08	0.1821	0.0142	GTAAC	G	0.058793	0.046853	0.20953	GTAAC	G	0.054026	0.044978	0.22969	GTAAC	G	0.067508	0.012769	1.2452e-07	GTAAC	G	-0.0145574	0.0866467	0.866576	0.217113
9:76176273:T:G	9	76176273	PCSK5	intronic	rs186910	t	g	0.0498	0.0113	9.858e-06	0.2476	0.0687	T	G	-0.029448	0.036675	0.422	T	G	-0.01203	0.033826	0.72211	T	G	-0.05727	0.012842	8.2072e-06	G	T	0.0663648	0.0731097	0.364014	0.44291
9:106728026:G:A	9	106728026	LINC01505(dist=48226),ZNF462(dist=135140)	intergenic	rs1430440	a	g	0.0443	0.0094	2.295e-06	0.3742	0.0531	G	A	0.029484	0.034972	0.39918	G	A	-0.052053	0.057562	0.36584	G	A	0.046876	0.0099733	2.5994e-06	G	A	0.130463	0.0738685	0.0773694	0.483628
9:108372818:T:A	9	108372818	KLF4(dist=883049),ACTL7B(dist=481771)	intergenic	rs1430435	a	t	-0.0578	0.0122	2.112e-06	0.1774	0.0391	T	A	-0.071357	0.041484	0.085414	T	A	-0.034225	0.035252	0.33162	T	A	-0.060956	0.013882	1.1288e-05	T	A	-0.023903	0.081872	0.770321	0.240888
9:128529861:C:G	9	128529861	MIR1268A	ncRNA_intronic	rs4525856	c	g	-0.2018	0.037	5.085e-08	0.9804	0.0041	C	G	0.027571	0.18974	0.88447	C	G	0.27806	0.090029	0.0020114	C	G	0.18636	0.041911	8.7256e-06	C	G	0.682059	0.33839	0.0438419	0.0105353
9:133169006:G:A	9	133169006	GBGT1(dist=5092),OBP2B(dist=36273)	intergenic	rs17573676	a	g	0.0448	0.0092	1.062e-06	0.6385	0.0894	G	A	0.087837	0.037751	0.019979	G	A	0.017084	0.031817	0.5913	G	A	0.043094	0.010003	1.6453e-05	A	G	-0.135519	0.0786594	0.0849134	0.329015
9:133257761:T:C	9	133257761	ABO	intronic	rs13059329	t	c	-0.0547	0.0091	1.552e-09	0.4065	0.0591	T	C	0.064044	0.040404	0.11294	T	C	0.005286	0.035787	0.88257	T	C	0.059922	0.0096943	6.3655e-10	C	T	0.094186	0.0810652	0.245294	0.246868
9:133263862:A:C	9	133263862	ABO	intronic	rs73058468	a	c	0.0889	0.009	4.783e-23	0.3842	0.0324	A	C	0.00013685	0.039877	0.99726	A	C	-0.054347	0.02989	0.069028	A	C	-0.10009	0.0097644	1.1762e-24	C	A	-0.0755196	0.0841994	0.369765	0.257688
9:133872761:G:C	9	133872761	VAV2	intronic	rs2673065	c	g	0.1405	0.0318	9.801e-06	0.0439	0.0361	G	C	0.23464	0.14213	0.098767	G	C	0.20579	0.053067	0.00010539	G	C	0.094307	0.041885	0.024349	G	C	0.044093	0.253142	0.861722	0.0195046
10:12243129:TG:T	10	12243129	CDC123	intronic	rs17213127	t	tg	0.0452	0.0096	2.275e-06	0.4838	0.0679	TG	T	0.044628	0.038964	0.25205	TG	T	0.026056	0.038468	0.49819	TG	T	0.046942	0.010306	5.2494e-06	TG	T	0.0286285	0.0712566	0.687856	0.482773
10:30544796:C:G	10	30544796	MAP3K8(dist=82963),LYZL2(dist=66983)	intergenic	rs7650511	c	g	-0.0964	0.0187	2.671e-07	0.9123	0.0513	C	G	0.088612	0.065856	0.17845	C	G	0.074162	0.039726	0.061928	C	G	0.10549	0.022759	3.5708e-06	C	G	0.0650573	0.133884	0.627023	0.0730353
10:31185614:T:C	10	31185614	ZNF438(dist=153677),LINC02664(dist=2269)	intergenic	NA	t	c	-0.0844	0.0162	2.016e-07	0.8859	0.0651	T	C	0.091568	0.066557	0.16889	T	C	0.11502	0.036538	0.0016447	T	C	0.07333	0.019032	0.00011664	T	C	0.179168	0.127511	0.159985	0.0858485
10:79645176:A:G	10	79645176	LINC02679	ncRNA_intronic	rs2271616	a	g	-0.0614	0.012	3.01e-07	0.7924	0.0093	A	G	0.070021	0.046853	0.13505	A	G	0.069551	0.040809	0.088321	A	G	0.064267	0.013142	1.0071e-06	A	G	-0.161557	0.0937312	0.0847761	0.1791
10:79946568:A:G	10	79946568	SFTPD	exonic	rs2531743	a	g	-0.0532	0.0087	1.158e-09	0.5794	0.0049	A	G	0.096236	0.034427	0.005185	A	G	0.0422	0.030231	0.16274	A	G	0.050305	0.0095538	1.3981e-07	A	G	0.0903389	0.0711872	0.20443	0.429527
10:80006668:A:G	10	80006668	SFTPD(dist=57563),TMEM254-AS1(dist=39565)	intergenic	rs67959919	a	g	-0.0972	0.019	3.236e-07	0.9337	0.0081	A	G	0.12151	0.080154	0.12952	A	G	0.38103	0.13838	0.005897	A	G	0.091604	0.019934	4.3179e-06	A	G	-0.0259412	0.167541	0.876952	0.0471241
10:112969804:C:A	10	112969804	TCF7L2	intronic	rs11712469	a	c	-0.0517	0.0105	8.415e-07	0.2616	0.1403	C	A	-0.057414	0.038466	0.13554	C	A	-0.063773	0.031515	0.043015	C	A	-0.052001	0.011754	9.6774e-06	C	A	0.0620908	0.0787686	0.43054	0.281464
10:124565646:G:A	10	124565646	LHPP	intronic	rs141146648	a	g	0.0816	0.0174	2.913e-06	0.1011	0.0383	G	A	0.02901	0.045088	0.51996	G	A	0.16366	0.044406	0.0002283	G	A	0.074963	0.021441	0.00047183	G	A	0.0692242	0.0941491	0.462181	0.186646
10:128433131:A:C	10	128433131	LINC01163(dist=115405),LINC02667(dist=479702)	intergenic	rs71325089	a	c	-0.129	0.0282	4.816e-06	0.9627	0.0059	A	C	0.22369	0.18471	0.22588	A	C	0.40359	0.22833	0.077133	A	C	0.12227	0.028904	2.3349e-05	A	C	0.127111	0.293977	0.665462	0.0132403
11:1219991:G:T	11	1219991	MUC5AC(dist=18853),MUC5B(dist=3075)	intergenic	rs1392288	t	g	-0.0975	0.015	7.947e-11	0.1039	0.0137	G	T	-0.019505	0.071642	0.78543	G	T	-0.14139	0.11974	0.23766	G	T	-0.098933	0.015532	1.8969e-10	G	T	-0.242627	0.155755	0.119292	0.0556663
11:6957217:A:G	11	6957217	ZNF215(NM_001354858:c.*6860>0,NM_001354857:c.*6860>0,NM_001354856:c.*6860>0,NM_013250:c.*6860>0,NM_001354855:c.*6860>0,NM_001354853:c.*6860>0,NM_001354860:c.*6860>0,NM_001354859:c.*6860>0)	UTR3	rs73070431	a	g	-0.0476	0.0098	1.234e-06	0.6286	0.0384	A	G	0.020609	0.037066	0.57822	A	G	0.077699	0.035445	0.028369	A	G	0.04717	0.010749	1.1423e-05	A	G	0.0456763	0.0717866	0.524595	0.424117
11:10646094:A:G	11	10646094	IRAG1	intronic	rs7623460	a	g	-0.0434	0.0097	7.324e-06	0.3184	0.0397	A	G	0.09195	0.046401	0.047521	A	G	0.10227	0.04037	0.011299	A	G	0.037005	0.010269	0.00031387	G	A	-0.0596583	0.0924478	0.518721	0.182802
11:34438684:C:T	11	34438684	CAT(dist=250)	upstream	rs34759782	t	c	0.0504	0.0111	5.588e-06	0.2257	0.0376	C	T	-0.064232	0.055417	0.24643	C	T	0.038691	0.072899	0.5956	C	T	0.056396	0.01151	9.5989e-07	C	T	-0.035605	0.119076	0.764931	0.104072
11:34482745:G:A	11	34482745	ELF5	intronic	rs1542756	a	g	-0.0893	0.0092	2.884e-22	0.3432	0.0406	G	A	-0.050678	0.034998	0.14761	G	A	-0.094135	0.038474	0.014415	G	A	-0.091959	0.0099445	2.3031e-20	G	A	-0.098681	0.0714783	0.16741	0.406891
11:34486581:T:C	11	34486581	ELF5	intronic	rs4383561	t	c	-0.0559	0.0096	6.295e-09	0.311	0.0409	T	C	-0.03651	0.035206	0.29972	T	C	0.0026028	0.037211	0.94424	T	C	0.068632	0.010503	6.3728e-11	C	T	-0.0448798	0.0713394	0.529282	0.440063
11:34500102:C:T	11	34500102	ELF5	intronic	rs149125253	t	c	0.0757	0.0137	3.341e-08	0.1045	0.0099	C	T	0.076869	0.061279	0.20969	C	T	0.12033	0.044784	0.0072116	C	T	0.069688	0.014932	3.0568e-06	C	T	0.134538	0.116413	0.247804	0.10094
11:34514038:G:C	11	34514038	ELF5(dist=244)	upstream	rs3092961	c	g	0.0445	0.0101	9.701e-06	0.5986	0.0397	G	C	0.015685	0.0357	0.66039	G	C	0.0025578	0.039443	0.94829	G	C	0.048892	0.010994	8.6962e-06	C	G	-0.116984	0.074069	0.114247	0.416429
11:117703682:T:C	11	117703682	DSCAML1	intronic	rs4683222	t	c	-0.1073	0.024	7.464e-06	0.1	0.0841	T	C	0.14331	0.098849	0.14713	T	C	0.12247	0.040075	0.0022436	T	C	0.099307	0.032051	0.0019459	C	T	0.0123433	0.149622	0.934251	0.0580866
12:41137089:TG:T	12	41137089	CNTN1(dist=64674),PDZRN4(dist=51231)	intergenic	rs3828477	t	tg	0.1087	0.0246	9.785e-06	0.11	0.0897	TG	T	0.067974	0.10791	0.52874	TG	T	0.10771	0.037821	0.0044031	TG	T	0.12077	0.034651	0.00049159	TG	T	-0.0528944	0.166868	0.751256	0.0469818
12:110459397:T:C	12	110459397	GPN3	intronic	rs73067779	t	c	0.0509	0.0115	9.157e-06	0.7949	0.1252	T	C	-0.12018	0.050903	0.018232	T	C	-0.031245	0.030994	0.3134	T	C	-0.047342	0.012832	0.00022493	T	C	-0.188665	0.0958298	0.0489818	0.167568
12:112920989:C:T	12	112920989	OAS1	intronic	rs34478154	t	c	0.0734	0.0097	3.621e-14	0.6873	0.0426	C	T	0.035909	0.045695	0.43196	C	T	0.013292	0.069575	0.84849	C	T	0.07545	0.010079	7.1275e-14	T	C	-0.172764	0.096768	0.0742058	0.165433
12:132512566:G:A	12	132512566	FBRSL1	intronic	rs7649277	a	g	-0.0483	0.0098	9.415e-07	0.3012	0.0262	G	A	-0.057415	0.038629	0.13719	G	A	-0.017359	0.041213	0.6736	G	A	-0.051961	0.010593	9.3256e-07	G	A	0.0902258	0.081464	0.268054	0.264949
12:132565387:T:C	12	132565387	FBRSL1	intronic	rs34082492	t	c	0.0663	0.0089	1.038e-13	0.48	0.0783	T	C	-0.060323	0.039489	0.12661	T	C	-0.075734	0.03659	0.038472	T	C	-0.06608	0.0095148	3.7852e-12	C	T	0.0603331	0.0821913	0.462914	0.257261
12:133248974:G:A	12	133248974	ANHX(dist=13097),NONE(dist=NONE)	intergenic	rs13107325	a	g	0.0555	0.0123	6.464e-06	0.2197	0.0342	G	A	0.13064	0.066739	0.050296	G	A	0.027926	0.080594	0.72896	G	A	0.054822	0.012759	1.7346e-05	G	A	-0.0459839	0.109671	0.675005	0.118736
13:112881427:C:T	13	112881427	ATP11A	intronic	rs115599607	t	c	0.0947	0.011	5.586e-18	0.2075	0.0286	C	T	0.1187	0.044751	0.0079914	C	T	0.028173	0.054385	0.60444	C	T	0.096736	0.011638	9.39e-17	C	T	0.0514693	0.0974575	0.597416	0.16287
13:112882153:G:A	13	112882153	ATP11A(NM_015205:c.*2870>0,NM_032189:c.*890>0)	UTR3	rs34712979	a	g	-0.0501	0.0106	2.495e-06	0.2278	0.0254	G	A	-0.013765	0.039787	0.72937	G	A	-0.048302	0.057739	0.40284	G	A	-0.051031	0.011362	7.0789e-06	G	A	-0.144028	0.0768173	0.0608005	0.287728
14:66241581:A:G	14	66241581	FUT8(dist=497460),CCDC196(dist=244790)	intergenic	rs202188157	a	g	-0.0797	0.0179	8.822e-06	0.8144	0.1361	A	G	0.01274	0.038907	0.74332	A	G	0.10138	0.032425	0.0017679	A	G	0.085107	0.027307	0.0018293	A	G	0.181608	0.0791972	0.0218414	0.312642
14:77869596:A:G	14	77869596	ADCK1	intronic	rs143556778	a	g	0.0414	0.0089	3.289e-06	0.4047	0.0355	A	G	0.0064203	0.039398	0.87055	A	G	-0.050589	0.030136	0.093219	A	G	-0.045637	0.009667	2.3481e-06	G	A	-0.101362	0.0763644	0.184396	0.309795
14:97907492:T:C	14	97907492	LINC02312(dist=144661),LINC01550(dist=18118)	intergenic	rs183231299	t	c	-0.1472	0.0304	1.299e-06	0.9708	0.0041	T	C	0.32011	0.18998	0.091989	T	C	0.0041324	0.27226	0.98789	T	C	0.14865	0.031149	1.8218e-06	T	C	-0.355616	0.34183	0.298187	0.0102506
15:31515116:G:C	15	31515116	OTUD7A	intronic	rs7689775	c	g	0.0787	0.0178	9.596e-06	0.0853	0.0515	G	C	-0.0086761	0.053409	0.87095	G	C	0.094913	0.039714	0.016853	G	C	0.090334	0.021993	4.0014e-05	G	C	0.0453009	0.0947336	0.632513	0.180809
15:45624910:C:G	15	45624910	BLOC1S6(dist=15194),SQOR(dist=6238)	intergenic	rs16877005	c	g	-0.071	0.0156	5.292e-06	0.8722	0.0581	C	G	0.081893	0.040783	0.044642	C	G	0.036637	0.04534	0.41907	C	G	0.07556	0.018599	4.8551e-05	C	G	0.0478924	0.0847687	0.572089	0.251566
15:64135505:A:C	15	64135505	SNX1	intronic	rs1017716	a	c	-0.0503	0.0105	1.5e-06	0.2488	0.1055	A	C	0.081235	0.036083	0.024367	A	C	-0.024305	0.032182	0.4501	A	C	0.059187	0.011763	4.8606e-07	C	A	0.0350901	0.0732725	0.632011	0.385535
15:83776948:T:TG	15	83776948	ADAMTSL3	intronic	rs73254177	t	tg	-0.0529	0.011	1.587e-06	0.4286	0.0904	T	TG	0.10244	0.052661	0.05175	T	TG	0.059993	0.040687	0.14034	T	TG	0.051255	0.01182	1.4498e-05	TG	T	0.0389322	0.0937112	0.677814	0.183371
16:3892266:G:T	16	3892266	CREBBP(dist=11553),LINC02861(dist=55360)	intergenic	rs35816121	t	g	0.2669	0.0465	9.641e-09	0.0118	0.0085	G	T	0.14273	0.22017	0.51681	G	T	0.271	0.097588	0.0054868	G	T	0.2767	0.055329	5.706e-07	G	T	0.157214	0.322731	0.626163	0.0121014
16:11373410:G:A	16	11373410	LOC400499	intronic	rs2616411	a	g	0.0526	0.0116	5.363e-06	0.2172	0.0681	G	A	0.093903	0.046566	0.043743	G	A	0.060595	0.031808	0.056778	G	A	0.046249	0.013016	0.00038056	G	A	0.1245	0.0838319	0.137514	0.245587
16:54221310:T:C	16	54221310	FTO(dist=99369),LINC02169(dist=24236)	intergenic	rs1469149	t	c	-0.0622	0.0112	2.986e-08	0.2537	0.0405	T	C	0.038564	0.057387	0.50159	T	C	0.062559	0.055761	0.26191	T	C	0.064371	0.011743	4.2098e-08	C	T	0.0615841	0.11728	0.599513	0.102221
16:75606623:T:C	16	75606623	ADAT1	intronic	rs25882	t	c	0.0768	0.0149	2.805e-07	0.8698	0.0922	T	C	-0.064528	0.03937	0.10121	T	C	-0.042839	0.05267	0.41602	T	C	-0.092386	0.01739	1.0813e-07	T	C	0.117172	0.0785185	0.135623	0.352363
16:75732975:A:G	16	75732975	CPHXL(dist=6485),CNTNAP4(dist=544426)	intergenic	rs77461733	a	g	0.1039	0.0235	9.976e-06	0.968	0.0034	A	G	-0.10575	0.1324	0.42444	A	G	0.20849	0.22563	0.35547	A	G	-0.10697	0.024152	9.4629e-06	A	G	-0.157445	0.253473	0.534499	0.0183656
16:89196249:G:A	16	89196249	SLC22A31	exonic	rs4475253	a	g	0.1036	0.0131	2.567e-15	0.1391	0.0186	G	A	0.1197	0.059535	0.04437	G	A	0.037953	0.099651	0.70331	G	A	0.10114	0.013651	1.2728e-13	G	A	0.294962	0.111773	0.00831666	0.107773
16:89262593:G:A	16	89262593	ZNF778(dist=25457),ANKRD11(dist=5039)	intergenic	rs30280	a	g	0.0716	0.0139	2.389e-07	0.1433	0.04	G	A	0.022355	0.04215	0.59586	G	A	0.011588	0.093	0.90084	G	A	0.077541	0.015101	2.825e-07	G	A	0.136599	0.0857682	0.111237	0.27705
17:1453350:C:G	17	1453350	CRK	intronic	rs2964772	c	g	-0.0976	0.0206	2.188e-06	0.9418	0.0093	C	G	0.044038	0.10475	0.67419	C	G	0.20394	0.15082	0.17631	C	G	0.097506	0.02134	4.8958e-06	C	G	0.116898	0.211108	0.57976	0.0264806
17:11499339:A:G	17	11499339	SHISA6	intronic	rs11742925	a	g	-0.0415	0.0093	8.269e-06	0.5902	0.0261	A	G	0.057154	0.035166	0.1041	A	G	0.01423	0.03221	0.65864	A	G	0.042144	0.010208	3.6484e-05	A	G	0.0767804	0.071402	0.282229	0.446042
17:16235835:T:C	17	16235835	PIGL	intronic	rs115013202	t	c	-0.0418	0.0088	1.952e-06	0.5457	0.054	T	C	0.048728	0.037162	0.18978	T	C	0.032581	0.032643	0.31824	T	C	0.042721	0.0094774	6.5544e-06	T	C	0.00236072	0.0759378	0.9752	0.344533
17:39909987:T:C	17	39909987	GSDMB	intronic	rs347666	t	c	-0.0401	0.0086	3.19e-06	0.498	0.0313	T	C	0.098705	0.034587	0.0043197	T	C	0.012232	0.029773	0.6812	T	C	0.038858	0.0093883	3.4878e-05	T	C	0.0212702	0.0718134	0.767088	0.420131
17:40022374:A:G	17	40022374	MED24	intronic	rs55724150	a	g	0.0424	0.009	2.682e-06	0.6208	0.0265	A	G	-0.047973	0.036304	0.18637	A	G	-0.059807	0.033598	0.075065	A	G	-0.037303	0.009806	0.00014229	A	G	-0.227628	0.073873	0.00206064	0.347096
17:45422978:G:C	17	45422978	ARHGAP27	intronic	rs17084072	c	g	-0.0532	0.0095	2.446e-08	0.6168	0.0424	G	C	-0.017783	0.035378	0.61521	G	C	-0.0921	0.031004	0.0029721	G	C	-0.054232	0.010568	2.8724e-07	C	G	-0.0580758	0.0723298	0.422015	0.406891
17:45983409:C:T	17	45983409	MAPT	exonic	rs9461128	t	c	-0.0911	0.011	1.438e-16	0.1784	0.0212	C	T	-0.047548	0.051105	0.35216	C	T	-0.21299	0.075683	0.0048889	C	T	-0.091763	0.011487	1.3695e-15	C	T	0.0175102	0.10596	0.868744	0.128274
17:45997220:G:A	17	45997220	MAPT	intronic	rs2768552	a	g	0.0635	0.0105	1.497e-09	0.254	0.0396	G	A	-0.014667	0.047851	0.75921	G	A	0.089782	0.063183	0.15533	G	A	0.067496	0.011009	8.7203e-10	G	A	0.0185729	0.093801	0.843043	0.173975
17:46053939:T:C	17	46053939	KANSL1	intronic	rs56098167	t	c	0.0423	0.0092	4.288e-06	0.4636	0.0326	T	C	-0.030887	0.036707	0.40011	T	C	-0.040019	0.030335	0.18709	T	C	-0.0457	0.010108	6.1471e-06	C	T	-0.0785841	0.0739592	0.287994	0.352221
17:46792201:C:T	17	46792201	WNT3	intronic	rs75397441	t	c	0.0411	0.0093	9.991e-06	0.334	0.0384	C	T	-0.013291	0.035034	0.70441	C	T	-0.034211	0.035394	0.33376	C	T	0.052372	0.010117	2.2566e-07	C	T	0.00870518	0.0728447	0.904877	0.444191
17:47836287:C:T	17	47836287	LRRC46	intronic	rs2517723	t	c	-0.0989	0.02	7.768e-07	0.0688	0.01	C	T	0.16409	0.093102	0.077982	C	T	-0.33078	0.17336	0.056384	C	T	-0.10988	0.020763	1.2084e-07	C	T	0.00120058	0.185611	0.994839	0.0380125
17:49863260:C:A	17	49863260	TAC4(dist=15243),DLX4(dist=105930)	intergenic	rs9295951	a	c	0.1861	0.0224	1.082e-16	0.0651	0.0446	C	A	0.18518	0.049641	0.00019122	C	A	0.078791	0.059757	0.18733	C	A	0.21864	0.028867	3.6178e-14	C	A	0.10073	0.099371	0.310738	0.166002
17:67817615:G:A	17	67817615	NOL11(dist=73084),BPTF(dist=7888)	intergenic	rs9263868	a	g	0.0766	0.0162	2.308e-06	0.0926	0.0146	G	A	-0.02783	0.080238	0.72871	G	A	0.13676	0.086037	0.11193	G	A	0.075144	0.016969	9.4934e-06	G	A	0.430856	0.163359	0.00835259	0.0492597
17:67867234:C:A	17	67867234	BPTF	intronic	rs9263993	a	c	0.0507	0.0106	1.609e-06	0.2476	0.0847	C	A	0.041434	0.037611	0.27062	C	A	0.047165	0.030171	0.11799	C	A	0.050262	0.011986	2.7465e-05	C	A	0.130142	0.075852	0.0862101	0.325171
18:22436126:C:T	18	22436126	CTAGE1(dist=18211),LOC101927571(dist=287365)	intergenic	rs1634761	t	c	0.0575	0.0111	2.134e-07	0.2158	0.068	C	T	0.07767	0.043481	0.074052	C	T	0.024608	0.04973	0.62072	C	T	0.060955	0.011917	3.1341e-07	C	T	-0.069936	0.0762131	0.358809	0.459567
19:1186560:C:T	19	1186560	SBNO2(dist=12292),STK11(dist=19218)	intergenic	rs112907408	t	c	0.0573	0.0119	1.566e-06	0.2351	0.0411	C	T	0.036258	0.042637	0.39511	C	T	0.0021683	0.044818	0.96141	C	T	0.065689	0.01314	5.7647e-07	C	T	0.004863	0.0747716	0.948144	0.359767
19:4063488:C:T	19	4063488	ZBTB7A	intronic	rs9295987	t	c	-0.0627	0.0111	1.886e-08	0.2018	0.0642	C	T	-0.11416	0.055055	0.038121	C	T	-0.023359	0.03131	0.45563	C	T	-0.06472	0.012309	1.4558e-07	C	T	-0.154936	0.0988615	0.117069	0.164151
19:4636934:C:T	19	4636934	SEMA6B(dist=77250),TNFAIP8L1(dist=2582)	intergenic	rs2284178	t	c	0.0488	0.0095	2.548e-07	0.6437	0.0366	C	T	0.093918	0.034844	0.007031	C	T	0.029688	0.030722	0.33387	C	T	0.046158	0.010491	1.0828e-05	T	C	-0.0850422	0.0721957	0.23882	0.42127
19:4656387:A:G	19	4656387	TNFAIP8L1(dist=819)	downstream	rs3095232	a	g	-0.1294	0.0269	1.451e-06	0.9623	0.0047	A	G	0.526	0.29464	0.074224	A	G	0.09525	0.24983	0.70301	A	G	0.12799	0.027224	2.5862e-06	A	G	-0.0924138	0.322693	0.774585	0.0106777
19:4692342:G:C	19	4692342	DPP9	intronic	NA	c	g	-0.0627	0.0104	1.557e-09	0.2839	0.0953	G	C	-0.056885	0.03698	0.12398	G	C	-0.055375	0.030388	0.068411	G	C	-0.062102	0.011718	1.1605e-07	G	C	-0.165028	0.0777437	0.0337775	0.295843
19:4717660:A:G	19	4717660	DPP9	intronic	rs4713505	a	g	-0.1473	0.0102	7.623e-47	0.7101	0.0386	A	G	0.14889	0.040571	0.00024274	A	G	0.11687	0.042291	0.0057195	A	G	0.14828	0.011043	4.205e-41	A	G	0.201566	0.0812157	0.0130697	0.226082
19:4729735:T:C	19	4729735	DPP9(dist=5893),MIR7-3HG(dist=39370)	intergenic	rs9268576	t	c	-0.1468	0.0315	3.083e-06	0.9703	0.0041	T	C	-0.21883	0.2252	0.3312	T	C	0.13692	0.27364	0.61682	T	C	0.15464	0.032175	1.5375e-06	T	C	0.126906	0.307041	0.679372	0.0129556
19:6841055:G:A	19	6841055	VAV1	intronic	rs6931277	a	g	-0.1684	0.0354	1.898e-06	0.1844	0.0795	G	A	-0.043101	0.13306	0.746	G	A	-0.17487	0.039268	8.4547e-06	G	A	-0.10562	0.12337	0.39195	G	A	-0.406231	0.184125	0.0273648	0.0390091
19:9875848:A:G	19	9875848	OLFM2	intronic	rs2858324	a	g	-0.042	0.0089	2.721e-06	0.4763	0.0773	A	G	0.10474	0.035297	0.0030021	A	G	0.10632	0.048988	0.02998	A	G	0.035014	0.0095011	0.00022842	G	A	-0.0405842	0.0704814	0.564741	0.478218
19:10296493:G:C	19	10296493	ICAM5	exonic	rs17219281	c	g	-0.0594	0.0088	1.785e-11	0.5502	0.021	G	C	-0.11796	0.036287	0.001151	G	C	-0.029081	0.030575	0.34154	G	C	-0.058283	0.0096262	1.4076e-09	C	G	0.0596521	0.0731909	0.41506	0.393793
19:10305768:G:A	19	10305768	ZGLP1	intronic	rs72879614	a	g	0.1153	0.0161	8.075e-13	0.0852	0.0076	G	A	0.14679	0.079527	0.064926	G	A	-0.026711	0.057032	0.63953	G	A	0.12703	0.017262	1.8535e-13	G	A	0.0948627	0.168495	0.573436	0.0484055
19:10335892:T:C	19	10335892	ICAM3	exonic	rs2068205	t	c	0.0692	0.0112	6.687e-10	0.7873	0.0161	T	C	-0.10074	0.04403	0.022137	T	C	-0.077131	0.041509	0.063143	T	C	-0.066822	0.01217	4.0031e-08	T	C	-0.0253799	0.0961713	0.791854	0.164294
19:10352442:G:C	19	10352442	TYK2	exonic	rs41435745	c	g	0.2333	0.0248	4.918e-21	0.0399	0.0059	G	C	0.39709	0.14169	0.0050698	G	C	-0.031534	0.19089	0.86879	G	C	0.2346	0.02552	3.8328e-20	G	C	0.0316541	0.266195	0.905344	0.0163724
19:10364976:C:A	19	10364976	TYK2	exonic	rs113820722	a	c	0.089	0.01	4.361e-19	0.2617	0.0358	C	A	0.052821	0.041756	0.20587	C	A	0.094272	0.047075	0.045223	C	A	0.091418	0.010595	6.2292e-18	C	A	0.0631808	0.0855929	0.46042	0.214977
19:10797947:G:T	19	10797947	DNM2	intronic	rs6904450	t	g	0.0543	0.0119	5.054e-06	0.1695	0.0257	G	T	0.069266	0.057905	0.23161	G	T	-0.038767	0.075082	0.60563	G	T	0.057574	0.012382	3.3247e-06	G	T	-0.0854296	0.121475	0.481889	0.0989465
19:34704606:G:A	19	34704606	ZNF302(dist=18209),ZNF181(dist=29637)	intergenic	rs2897075	a	g	0.1371	0.0306	7.643e-06	0.0281	0.0037	G	A	0.036231	0.1257	0.77316	G	A	0.53211	0.20606	0.0098156	G	A	0.14256	0.032233	9.7475e-06	G	A	-0.379437	0.25164	0.131591	0.0206435
19:45869791:ATT:A	19	45869791	FOXA3	intronic	rs7807934	a	att	0.0599	0.0113	1.122e-07	0.2958	0.0196	ATT	A	0.074926	0.044243	0.090357	ATT	A	0.031605	0.033546	0.34611	ATT	A	0.062551	0.012579	6.6025e-07	ATT	A	0.0631897	0.0859736	0.462345	0.248576
19:48700572:C:T	19	48700572	FUT2	intronic	rs3757447	t	c	-0.0593	0.0102	5.136e-09	0.3964	0.0695	C	T	-0.12023	0.043915	0.0061864	C	T	-0.041894	0.059465	0.48111	C	T	-0.057701	0.010674	6.4606e-08	C	T	0.0413583	0.0898291	0.645221	0.202591
19:50359766:A:G	19	50359766	NAPSA	exonic	rs2966437	a	g	-0.0775	0.0092	3.939e-17	0.6584	0.0419	A	G	0.15072	0.03473	1.4259e-05	A	G	0.027142	0.030317	0.37065	A	G	0.076273	0.010169	6.3576e-14	A	G	0.108506	0.071208	0.127561	0.475797
20:6308945:G:T	20	6308945	FERMT1(dist=185915),CASC20(dist=117787)	intergenic	rs34138876	t	g	0.0408	0.0089	4.251e-06	0.4414	0.06	G	T	0.071808	0.036776	0.050867	G	T	0.019478	0.032309	0.54659	G	T	0.042478	0.0096131	9.9274e-06	G	T	-0.0679884	0.0723907	0.347635	0.396213
20:6492834:T:A	20	6492834	CASC20	ncRNA_intronic	rs138089196	a	t	-0.0485	0.009	7.351e-08	0.3941	0.036	T	A	-0.064169	0.034784	0.065066	T	A	0.0004706	0.031722	0.98816	T	A	-0.051302	0.0098597	1.9589e-07	A	T	0.0862361	0.0719962	0.231	0.484624
20:19697070:G:A	20	19697070	SLC24A3	intronic	rs800572	a	g	0.0547	0.0115	1.851e-06	0.5176	0.0774	G	A	0.063203	0.037544	0.092292	G	A	0.023187	0.034774	0.5049	G	A	0.062437	0.013058	1.7399e-06	A	G	0.0691446	0.0696773	0.321024	0.473662
20:23810913:G:A	20	23810913	CST1(dist=59978),CST2(dist=12856)	intergenic	rs8192330	a	g	0.1848	0.0387	1.757e-06	0.0325	0.0229	G	A	-0.48729	0.23056	0.034562	G	A	0.17935	0.060481	0.0030223	G	A	0.21801	0.052142	2.9e-05	G	A	0.406789	0.338722	0.22977	0.0112472
20:33607945:C:T	20	33607945	CBFA2T2	intronic	rs4403445	t	c	0.1068	0.0213	5.103e-07	0.054	0.0085	C	T	0.055628	0.10426	0.59367	C	T	0.64962	0.13458	1.3861e-06	C	T	0.0937	0.022124	2.2827e-05	C	T	0.176479	0.216165	0.414266	0.0284738
20:38794186:G:A	20	38794186	ACTR5(dist=21667),PPP1R16B(dist=11511)	intergenic	rs76497941	a	g	0.0518	0.0114	5.916e-06	0.7196	0.0149	G	A	0.014611	0.039839	0.71381	G	A	0.014943	0.038882	0.70075	G	A	0.058694	0.0127	3.8109e-06	A	G	-0.085053	0.080804	0.292531	0.260962
20:59025600:G:C	20	59025600	ATP5F1E(NM_006886:c.*32450>0),TUBB1(NM_030773:c.*8170>0)	UTR3	rs962719	c	g	-0.0623	0.0134	3.444e-06	0.1644	0.02	G	C	-0.038665	0.047483	0.41548	G	C	-0.06668	0.091122	0.46431	G	C	-0.063315	0.014289	9.3792e-06	G	C	-0.113782	0.102786	0.2683	0.138667
21:33203593:G:A	21	33203593	LINC01548(dist=33357),IFNAR2(dist=26302)	intergenic	rs7852356	a	g	-0.0591	0.0109	6.266e-08	0.2562	0.0779	G	A	-0.11448	0.042143	0.0065981	G	A	-0.015082	0.03065	0.62266	G	A	-0.062475	0.012308	3.8572e-07	G	A	-0.01517	0.0836773	0.856139	0.234055
21:33220158:T:C	21	33220158	LINC01548(dist=49922),IFNAR2(dist=9737)	intergenic	rs146902539	t	c	-0.1239	0.0266	3.208e-06	0.9666	0.005	T	C	0.020189	0.13315	0.87948	T	C	0.357	0.21748	0.10069	T	C	0.12277	0.027524	8.177e-06	T	C	0.296075	0.264087	0.262234	0.0182232
21:33237639:A:G	21	33237639	IFNAR2	intronic	rs35781646	a	g	-0.1294	0.0093	1.456e-43	0.6646	0.042	A	G	0.15576	0.034864	7.9107e-06	A	G	0.11158	0.035976	0.0019249	A	G	0.12824	0.010176	2.0488e-36	A	G	0.143888	0.0716713	0.0446844	0.455581
21:33239403:A:G	21	33239403	IFNAR2	intronic	rs8176715	a	g	0.0847	0.0143	3.337e-09	0.8938	0.034	A	G	-0.22245	0.068242	0.0011149	A	G	-0.036535	0.038353	0.3408	A	G	-0.085348	0.015968	9.053e-08	A	G	-0.0934576	0.128007	0.465331	0.082574
21:33248442:G:C	21	33248442	IFNAR2	intronic	rs657152	c	g	0.1314	0.0235	2.103e-08	0.0431	0.0212	G	C	0.16285	0.11042	0.14029	G	C	0.10042	0.053094	0.058581	G	C	0.13836	0.027132	3.409e-07	G	C	0.0869172	0.209633	0.678423	0.0287585
21:33278486:A:G	21	33278486	IL10RB	intronic	rs73662320	a	g	-0.0681	0.0096	1.009e-12	0.7139	0.03	A	G	0.13361	0.039318	0.00067814	A	G	0.061439	0.038486	0.1104	A	G	0.063026	0.010271	8.457e-10	A	G	0.138041	0.0816116	0.090754	0.246298
21:33586898:T:C	21	33586898	DONSON	intronic	rs77264633	t	c	0.0417	0.0092	6.525e-06	0.3401	0.0257	T	C	-0.064639	0.03674	0.078519	T	C	0.030955	0.035462	0.38271	T	C	-0.045214	0.010011	6.2857e-06	C	T	0.0732108	0.0746877	0.326975	0.322751
21:33934844:G:A	21	33934844	LINC00649	ncRNA_intronic	rs10811479	a	g	0.1336	0.0156	1.077e-17	0.0949	0.0307	G	A	0.21438	0.045061	1.9604e-06	G	A	0.086209	0.09386	0.35837	G	A	0.12079	0.017198	2.1622e-12	G	A	0.209157	0.0911186	0.021708	0.197181
21:34139647:G:A	21	34139647	MRPS6	intronic	rs79214653	a	g	-0.0702	0.0156	6.629e-06	0.119	0.0931	G	A	-0.11228	0.070368	0.11058	G	A	-0.073346	0.03333	0.027762	G	A	-0.063534	0.018379	0.00054646	G	A	-0.203978	0.127571	0.109835	0.0874146
21:36822398:G:A	21	36822398	HLCS	intronic	rs12341875	a	g	-0.0519	0.0107	1.313e-06	0.2882	0.0285	G	A	-0.14482	0.046916	0.0020238	G	A	-0.0037225	0.036942	0.91974	G	A	-0.050622	0.011633	1.3528e-05	G	A	-0.0748214	0.0947191	0.429569	0.172409
21:41479527:A:C	21	41479527	TMPRSS2	intronic	rs10758202	a	c	0.0663	0.0117	1.31e-08	0.7756	0.0341	A	C	-0.0012218	0.051322	0.98101	A	C	-0.083913	0.044088	0.057001	A	C	-0.068488	0.012505	4.326e-08	A	C	-0.0878223	0.120949	0.467772	0.101794
21:41486440:T:C	21	41486440	TMPRSS2	intronic	rs60840586	t	c	0.0439	0.0093	2.133e-06	0.4545	0.0327	T	C	-0.011456	0.035414	0.74633	T	C	-0.055941	0.032187	0.082213	T	C	-0.045532	0.010148	7.2255e-06	C	T	0.0349867	0.0722245	0.628091	0.398491
22:29161304:G:A	22	29161304	KREMEN1	intronic	rs764328	a	g	-0.0583	0.0121	1.487e-06	0.2213	0.0297	G	A	-0.15028	0.05585	0.0071277	G	A	-0.059879	0.038349	0.11842	G	A	-0.051345	0.01333	0.00011721	G	A	-0.109173	0.075535	0.148365	0.349374
22:42752315:G:C	22	42752315	A4GALT(dist=31014),ARFGAP3(dist=44188)	intergenic	rs2377527	c	g	-0.0861	0.0189	5.183e-06	0.0674	0.0105	G	C	-0.25719	0.10011	0.010194	G	C	-0.051438	0.12419	0.67874	G	C	-0.07694	0.019563	8.389e-05	G	C	-0.462635	0.20339	0.0229287	0.0311788
23:15383291:C:T	23	15383291	NONE(dist=NONE),NONE(dist=NONE)	intergenic	rs6632521	t	c	0.0318	0.0071	7.849e-06	0.2599	0.065	C	T	-0.02786	0.034694	0.42196	C	T	0.043306	0.029187	0.13787	C	T	0.033468	0.007555	9.425e-06	C	T	0.0693319	0.0714852	0.332107	0.212557
23:15523993:G:A	23	15523993	NONE(dist=NONE),NONE(dist=NONE)	intergenic	rs35697037	a	g	0.0398	0.0064	6.451e-10	0.4462	0.0454	G	A	0.10575	0.031276	0.00072171	G	A	-0.023001	0.033394	0.49097	G	A	0.039838	0.0067618	3.8253e-09	G	A	-0.000767422	0.0601212	0.989816	0.378986
23:15599940:T:C	23	15599940	NONE(dist=NONE),NONE(dist=NONE)	intergenic	rs1978124	t	c	-0.031	0.0067	3.157e-06	0.4925	0.0719	T	C	0.070981	0.057336	0.21572	T	C	0.10706	0.069642	0.12421	T	C	0.030015	0.0067654	9.142e-06	C	T	-0.00271359	0.0703894	0.969248	0.22779
