# Supplementary material for: Novel risk loci for COVID-19 hospitalization among admixed American populations
Source: eLife. 2024 Oct 3;13:RP93666. doi: 10.7554/eLife.93666 (PMC11449485; doi:10.7554/eLife.93666)
Supplement: Supplementary file 14. [file elife-93666-supp14.xlsx]

## Sheet: Supplementary Table 14.
Supplementary Table 14. Instruments used in the Polygenic Risk Score model (hg38).
rsid	SNP	EA	beta	commentary	gene	STUDY
rs35154152	chr1:155202934:T:C	C	-0.13041	Not_present	THBS3	HGI v7
rs11264349	chr1:155278322:A:C	A	-0.062		HCN3	GenOMICC
rs10890422	chr1:46810098:T:C	C	-0.047171		CYP4B1	HGI v7
rs11208552	chr1:64947147:G:T	T	-0.054975		JAK1	HGI v8
rs7515509	chr1:77483438:G:A	A	0.062296		AK5	HGI v9
rs2478868	chr1:9067157:C:A	A	-0.083		SLC2A5	GenOMICC
rs7897438	chr10:112972548:C:A	A	-0.053738		TCF7L2	HGI v7
rs3934643	chr10:79977061:G:A	A	0.077333		SFTPD(dist=27956),TMEM254-AS1(dist=69172)	HGI v7
rs35705950	chr11:1219991:G:T	T	-0.10119		MUC5AC(dist=18853),MUC5B(dist=3075)	HGI v7
rs7949972	chr11:34480495:C:T	T	-0.087013		ELF5	HGI v7
rs10850094	chr12:112922758:T:C	C	0.074444		OAS1	HGI v7
rs5023077	chr12:132565387:T:C	C	-0.066746		FBRSL1	HGI v7
rs12585036	chr13:112881427:C:T	T	0.097378		ATP11A	HGI v7
rs117169628	chr16:89196249:G:A	A	0.098534		SLC22A31	HGI v7
rs241044	chr17:45635098:G:A	A	-0.087001		LINC02210	HGI v7
rs3848456	chr17:49863260:C:A	A	0.19199		TAC4(dist=15243),DLX4(dist=105930)	HGI v7
rs34536443	chr19:10352442:G:C	C	0.23431		TYK2	HGI v7
rs142770866	chr19:10414696:G:A	A	0.18		CDC37(dist=11154),PDE4A(dist=2077)	GenOMICC
rs71175234	chr19:45869791:ATT:A	A	0.062102		FOXA3	HGI v7
rs12610495	chr19:4717660:A:G	G	0.1499		DPP9	HGI v7
rs516316	chr19:48702888:G:C	C	-0.057447		LOC105447645	HGI v7
rs1405655	chr19:50379362:T:C	C	0.077686		NR1H2	HGI v7
rs1662979	chr2:26616850:G:T	T	0.049772		CIB4	HGI v7
rs1123573	chr2:60480453:A:G	G	-0.071705		BCL11A	HGI v7
rs2326788	chr20:6489447:G:A	A	-0.073		CASC20	GenOMICC
rs9636867	chr21:33237639:A:G	G	0.13121		IFNAR2	HGI v7
rs78143111	chr21:33934844:G:A	A	0.13022		LINC00649	HGI v7
rs9305744	chr21:41471061:G:A	A	-0.050483		TMPRSS2	HGI v7
rs11924013	chr3:101647854:G:A	A	-0.06008		PCNP(dist=53388),ZBTB11(dist=1035)	HGI v7
rs73062389	chr3:45793925:G:A	A	0.16012		SLC6A20	HGI v7
rs17713054	chr3:45818159:G:A	A	0.48958		SLC6A20(dist=21623),LZTFL1(dist=5159)	HGI v7
rs72670002	chr4:105673359:G:A	A	0.095		ARHGEF38	GenOMICC
rs34712979	chr4:105897896:G:A	A	-0.06072		NPNT	HGI v7
rs1073165	chr4:167824478:A:G	A	0.095		SPOCK3(dist=589888),ANXA10(dist=268059)	GenOMICC
rs16877005	chr4:25312372:A:G	G	0.093562		ZCCHC4(dist=402)	HGI v7
rs7671107	chr4:25447603:G:A	A	-0.071892		ANAPC4(dist=29105),LOC101929161(dist=83437)	HGI v7
rs10066378	chr5:132441275:T:C	C	0.074001		IRF1-AS1	HGI v7
rs2517723	chr6:29947491:C:T	T	-0.06117		HLA-A(dist=1607),HCG9(dist=27624)	HGI v7
rs1128175	chr6:31182658:A:G	G	-0.066846		PSORS1C3	HGI v7
rs2071590	chr6:31571991:A:G	A	0.095		LTA	GenOMICC
rs35122968	chr6:32714422:T:C	C	-0.10631		HLA-DQB1(dist=47765),HLA-DQA2(dist=26969)	HGI v7
rs12660421	chr6:41520640:G:A	A	0.24033		LINC01276(dist=788)	HGI v7
rs2897075	chr7:100032719:C:T	T	0.049692		ZKSCAN1	HGI v7
rs717624	chr7:22854868:T:C	C	-0.049354		SNHG26	HGI v7
NA	chr7:75622276:CA:C	C	0.04531		HIP1	HGI v7
rs2875968	chr8:60513412:G:A	A	0.050369		LINC01301(dist=99594),RAB2A(dist=3498)	HGI v7
rs505922	chr9:133273813:C:T	T	-0.087094		ABO	HGI v7
rs79611697	chr9:15795835:G:T	T	0.10347		CCDC171	HGI v7
rs28368148	chr9:21206606:C:G	G	0.22961	Not_present	IFNA10	HGI v7
rs202198158	chr9:33425186:GTAAC:G	G	0.065743		AQP7(dist=22504),AQP3(dist=15975)	HGI v7
