# Supplementary material for: Novel risk loci for COVID-19 hospitalization among admixed American populations
Source: eLife. 2024 Oct 3;13:RP93666. doi: 10.7554/eLife.93666 (PMC11449485; doi:10.7554/eLife.93666)
Supplement: Supplementary file 15. — Reference class for the multinomial regression is ‘asymptomatic’. [file elife-93666-supp15.xlsx]

## Sheet: Supplementary Table 15.
Supplementary Table 15. Multinomial regression results. Reference class for the multinomial regression is "asymptomatic".
CATEGORY	BETA	SE	OR	IC_LOW	IC_UPPER	Z-VALUE	P-VALUE
Mild	0.01329	0.0785822	1.01338	0.868723	1.18212	0.169123	0.8657
Moderate	0.111191	0.10036	1.11761	0.91804	1.36056	1.10792	0.267897
Severe	0.26385	0.0884621	1.30193	1.09468	1.54842	2.98263	0.00285781
Critical	0.457885	0.0905167	1.58073	1.32375	1.88758	5.05857	4.22421e-07
